# Supplementary material for: Genome-wide association, RNA-seq and iTRAQ analyses identify candidate genes controlling radicle length of wheat
Source: Front Plant Sci. 2022 Sep 28;13:939544. doi: 10.3389/fpls.2022.939544 (PMC9554269; doi:10.3389/fpls.2022.939544)
Supplement: Supplementary file 7 [file Table_1.XLSX]

## Sheet: Sheet1
Table S1. Information of the 196 wheat accessions assessed in this study
Taxa	Accession	Origin	Pedigree	Registered year
ZQ001	Zhoumai9	Henan	(Yumai 2/Bainong 791)//(Lumai 1/Yanshi 4)	1992
ZQ002	Yumai49	Henan	Wen 2540 mutations	1998
ZQ003	Yumai47	Henan	Baofeng 7228/Baiquan 3199	1997
ZQ004	Yumai18	Henan	Zhengzhou 761/Yanshi 4	1990
ZQ005	Zhongmai1	Henan	Luomai 4/northwestern dwarf (97-26)	2004
ZQ006	Yannong19	Shandong	Yan 1933/Shan 82-29	2001
ZQ007	Hengguan35	Hebei	Heng 84Guan 749/Heng 87-263	2006
ZQ008	Zhengmai366	Henan	Yumai 47/PH82-2-2	2005
ZQ009	Xuke1	Henan	3047-3/Neixiang 82C6	2009
ZQ010	Yumai34	Henan	Aifeng 3/Meng 201//Neuzucht///Yumai 2	1994
ZQ011	Zhoumai19	Henan	Zhoumai 13/Shanyou 225//PH82-2	2004
ZQ012	Zhoumai13	Henan	Zhou 8425B/Zhoumai 9	1998
ZQ013	Luomai4	Henan	80(6)-3-3-10/Aizao 781	2003
ZQ014	Jinan17	Shandong	Linfen 5046/Lumai 13	2002
ZQ015	Yanzhan4110	Henan	Yanshi (1)-0-3-1/Yumai 10	2003
ZQ016	Xinmai18	Henan	(C5/Xinxiang 3577) F3//Xinmai 9	2004
ZQ017	Zhoumai18	Henan	Neixiang 185/Zhoumai 9	2004
ZQ018	Fanmai5	Henan	Ji 5418/Jingfan 309//Zhoumai 13	2005
ZQ019	Zhengmai004	Henan	Yumai 13/90m434//Shi 89-6021	2004
ZQ020	Zhengmai9023	Henan	{(Xiaoyan 6×Xinong 65)×[83(2)3-3×84(14)43]}F3×Shan 213	2001
ZQ021	Neixiang188	Henan	Miangyang 84-27/Neixiang 82C6//Yumai 17	2000
ZQ022	Aikang58	Henan	Zhoumai 11//Wenmai 6/Zhengzhou 8960	2005
ZQ023	Xiaoyan81	Beijing	Xiaoyan 54×8602	2005
ZQ024	Zhengyumai9987	Henan	Yumai 21/ Yumai2// Yumai 57	2007
ZQ026	Xinmai19	Henan	(C5/Xinxiang 3577)F3d1//Xinmai 9	2006
ZQ027	Luomai21	Henan	Luomai 1 / Zhoumai 13	2006
ZQ028	Zhongyu12	Henan	Aibai progenies /Bainong 64	2008
ZQ029	Yimai6	Henan	Zhoumai 9/Yumai 18	2011
ZQ030	Nongda1108	Beijing	5108/Riband//Wen 6/3/Zhoumai 134	2012
ZQ031	Kaimai21	Henan	D9401/Kaimai 16	2011
ZQ032	Yujiao5	Henan	Zheng 91138/ Yamai 49	2011
ZQ034	Pingan8	Henan	Yumai 2 /Zhoumai 13	2011
ZQ035	Luomai24	Henan	Luotai 911/Huaimai 18	2013
ZQ036	Wennong14	Shandong	84139//9215/876161	2010
ZQ037	Shi4185	Hebei	Zhi 8094/Yumai 2/Shi 84-7120	2001
ZQ038	Luomai23	Henan	Yumai 18/Huaiyin 9628	2009
ZQ039	Xinmai9	Henan	3047-3/Neixiang 82C6	1997
ZQ040	Yumai2	Henan	65(14)3/Kanghuihong	1983
ZQ041	Bainong3217	Henan	(Funo/NX5//Xiannong 39)/(XN64/YD24)	1981
ZQ042	Shaanyou225	Shaanxi	Xiaoyan 6/NS2761	1992
ZQ043	86(79)-128	Henan	86-178/11013	1994
ZQ044	Chinese Spring	Sichuan	Unknown	Landrace
ZQ045	Xinmai20	Henan	Yanzhan 1/Xinmai 9	2007
ZQ046	Zhengmai7698	Henan	Zhengmai 9405/4B269// Zhoumai 16	2011
ZQ047	Jimai22	Shandong	935024/935106	2006
ZQ048	Zhoumai23	Henan	Zhoumai 13/Xinmai 9	2008
ZQ049	Liangxing99	Shandong	Ji 91102/Lumai 14//PH85-16	2004
ZQ050	Zhongmai875	Beijing	Zhoumai 16/Liken 6	2014
ZQ051	Yunong201	Henan	Neixiang 182/818036//Tai 910989/Shi 6021	2006
ZQ052	Yumai52	Henan	Yumai 1//Sichuan oligoculm/Puyang 5	1998
ZQ053	Yumai68	Henan	(Bainong 3217/Yumai 3)F1/(Ji 84-5418/Yumai 10)F1	2000
ZQ054	Yunong202	Henan	Yumai 21/Yunong 127	2007
ZQ055	Yunong416	Henan	Yumai 49// Yumai 21/ Yumai 35	2009
ZQ056	Yunong982	Henan	HY9153/Bainong 3217// Yumai 49	2009
ZQ057	Yunong949	Henan	(Zhengtaiyu 92215/90m434)F1/90(232)	2005
ZQ058	Yubao1	Henan	89(35)-14/Aizao 781-4	2008
ZQ059	Zhengnong17	Henan	Yumai 51/Youfan 5	2003
ZQ060	Yunong9901	Henan	Xianyang super spike/Yunong 8923	2004
ZQ061	Anmai8	Henan	Aibai recurrent selection lines	2002
ZQ062	Ruzhou0319	Henan	Taigu/ Zhoumai 9, etc.	2009
ZQ063	Yuanyu3	Henan	Bainong 64/Zhoumai 11	2006
ZQ064	Taikong6	Henan	Yumai 49spaceflight mutation	2003
ZQ065	Yantian9433	Henan	Zhoumai 9/ Yumai 18	2006
ZQ066	Zhoumai22	Henan	Zhoumai 12/Wenmai 6//Zhoumai 13	2007
ZQ067	04zhong36	Henan	Bainong 64/ Zhoumai 11	2006
ZQ068	Lankao198	Henan	R81/ Bainong 64//Yanzhan 4110	2011
ZQ069	Xuke316	Henan	Zhoumai 16/ Bainong 64	2011
ZQ070	Guomai301	Henan	G883/Pumai 9	2012
ZQ071	Xinmai26	Henan	Xinmai 9408/Jinan 17	2010
ZQ072	Luohan6	Henan	Yumai 49/Shannong 45	2006
ZQ073	Jihan2	Shandong	Unknown	2001
ZQ074	Xinhan1	Henan	Unknown	2011
ZQ075	Zhenghan1	Henan	Zhengzhou 831/Yumai 13	1999
ZQ076	Yunong4023	Henan	Zhoumai 16/Xinhan 1	2011
ZQ077	Qiule2122	Henan	Xunong 5/Xinmai 18	2014
ZQ078	Xuke415	Henan	Zhoumai 16/recurrent selection 01-1	2014
ZQ079	Zhengyumai043	Henan	Yumai 57/ Zhoumai 16	2014
ZQ080	Pingan11	Henan	Exterior line 835/ Self-selection Z52	2015
ZQ081	Cunmai10	Henan	Zhoumai 24/Aikang 58	2015
ZQ082	Zhengmai 103	Henan	Zhou13/D8904-7-1//Zheng 004	2014
ZQ083	Zhengmai113	Henan	Aikang 58/Yanzhan 4110	2015
ZQ084	Pu2056	Henan	Zhoumai 16/Yumai 24	Regional test
ZQ085	Zhongyu9302	Henan	Aibai/(Zhoumai 16/04zhong36)	2014
ZQ086	Fanmai11	Henan	Fanai 2/Yuangfan 3	2008
ZQ087	Luomai05159	Henan	Aikang 58/Kaimai 18	2014
ZQ088	Zhengmai1023	Henan	Zhoumai 16/Yumai 34// Zhoumai 16	Regional test
ZQ089	Yanke028	Henan	Zhoumai 16/Yanke 95-6	2015
ZQ091	Luoxin998	Henan	Bainong 71-22/Yumai 18//Wen 2540/Lovrin 10	2008
ZQ092	Han6172	hebei	J1697(Shannong 17sib line)/Yannong 19	2002
ZQ093	Zhou8425B	Henan	Zhou 78A/Annong 7959	1996
ZQ096	Jinmai47	shanxi	12057/Han 522/k37-20	1995
ZQ098	Shan160	Shaanxi	Shan 213/167-6-4	1996
ZQ101	Zhoumai16	Henan	Zhoumai 9/ Zhou8425B	2002
ZQ102	Pumai9	Henan	Xuzhou 174/Neixiang 183//Yumai 24	2004
ZQ103	Lankaoaizao8	Henan	Triticale84(184)/90pedigree selection	2003
ZQ104	Shannong7859	Shaanxi	(Shanqianmai/7576)//(Sib/6811(2))	1991
ZQ105	Yumai8	Henan	Aifeng 3/6850	1985
ZQ106	Bainong64	Henan	Bainong 8717/ Bainong 844046-1	1998
ZQ107	Kaimai18	Henan	Kaimai 64/89Zhong170//Kaimai 1003/Wen 2540	2006
ZQ108	Luohan3	Henan	Yumai 2 /Yumai 18// Yumai 48	2004
ZQ109	Hemai026	Henan	Zhoumai 13 ion beam mutation line	2006
ZQ110	Aifeng3	Shaanxi	58(18)2/Fengchan 3	1970
ZQ111	Yumai51	Henan	Zhou 8425B/Zhoumai 17	1998
ZQ112	Haocheng8901	Hebei	77546-2/Linzhangmai	1998
ZQ113	Nanda2419	Jiangsu	Mentana pedigree selection	1942
ZQ114	Sumai3	Jiangsu	Taiwanxiaomai/Funo	1970
ZQ115	Zhengmai98	Henan	Yumai 49, etc. recurrent selection	2002
ZQ116	Yunong211	Henan	Yunong 201// Yunong 9234903/Hard winter	2014
ZQ118	Beijing841	Beijing	Beijing 18 /Fengkang 4//Nongda 139	1992
ZQ119	Bainong 160	Henan	Duokang 893/Wenmai 6//Bainong 64/ Wenmai 6	2012
ZQ120	Zhengmai9694	Henan	Yumai 21/ Yumai 18// Yumai 21	2006
ZQ121	Xinmai208	Henan	Jimai 5418/Yumai 18	2005
ZQ122	Xun9917	Henan	Unknown	Regional test
ZQ123	Pumai10	Henan	Zhou 8425B/Jiheng 90-4041	2006
ZQ124	Pingan3	Henan	Lankao 8679/Yumai 18//Xiang 8820	2006
ZQ125	Pingan6	Henan	Laizhou 953/Wen 2540	2006
ZQ126	Pingan9	Henan	(Yumai 59/ Yumai 21)//(Zhengmai 91138/ Yumai 49)	2014
ZQ127	Zhoumai26	Henan	Zhoumai 24/ Zhoumai 22	2012
ZQ128	Luomai31	Henan	Luomai 21/ Aikang 58	2016
ZQ129	Zhengyumai0519	Henan	Aikang 58/Yuzhan 9804	Regional test
ZQ130	Zhongyanmai0708	Jiangsu	Yumai 54/Zhoumai 9	2016
ZQ131	Tunfeng802	Henan	Luomai 9∥Shangyan 99-0267∕Zhoumai 13	Regional test
ZQ132	Cunmai12	Henan	Zhoumai 16/Shanyou 225//Aikang 58	2016
ZQ133	Guoyu101	Henan	Unknown	Regional test
ZQ134	Xumai1242	Henan	Unknown	Regional test
ZQ135	Xumai0054	Jiangsu	Xinmai 93119/Zhoumai 16	2016
ZQ136	Luomai8	Henan	Yanzhong 1604/Wenmai 4	2007
ZQ137	Zhengmai0856	Henan	Zhengmai 9405/4B269//Zhoumai 16	2007
ZQ138	Yunong186	Henan	Zhoumai 16/Yunong 202	2012
ZQ139	Xin0208	Henan	Xinmai 18/Shanyou 225	2016
ZQ140	Luomai 18	Henan	4336/ Zhoumai 16	2014
ZQ141	Zhengmai583	Henan	Bainong AK58pedigree selection	2012
ZQ142	Zhongyu9307	Henan	Aibai//Zhoumai 16/04zhong36	2014
ZQ143	Luo6073	Henan	Nuclear sterile recurrent populationⅡ	2014
ZQ144	Huayu198	Henan	Bainong 64/Zhoumai 16	2014
ZQ145	Bainong207	Henan	Zhoumai 16/Bainong 64	2013
ZQ146	Zhengmai379	Henan	Zhoumai 13/D9054-6-1(41)	2012
ZQ147	Zhengmai101	Henan	Ta1648/Zhengmai 9023	2013
ZQ148	Cunmai1	Henan	Zhou 9811/ Aikang 58	2011
ZQ149	Fengdecunmai5	Henan	Zhoumai 16/Zhengmai 366	2014
ZQ150	Fengdecunmai8	Henan	Zhoumai 24/ Zhoumai 22	2014
ZQ151	Bonong6	Henan	Bonong 653/Zhengmai 9023//RECITAL	2014
ZQ152	Weilai0818	Anhui	Huaimai 18/Su 9908	2014
ZQ153	Huarui00712	Jiangsu	Huaimai 18/Lumai 14	Regional test
ZQ154	Huaimai0882	Jiangsu	Yannong 19/Zhengmai 991	2014
ZQ155	Zhoumai24	Henan	Zhoumai 16/Shanyou 225	2012
ZQ156	Zhoumai27	Henan	Zhoumai 16/ Aikang 58	2011
ZQ157	Huaimai19	Jiangsu	Recurrent selection of Taigu	2001
ZQ158	Yumai41	Henan	Yumai 25 mutations	1996
ZQ159	Yumai55	Henan	Zhengzhou 761 /Fan 9//77（2）	1999
ZQ160	Yumai14you	Henan	(Yanda 72-629/resistant 7410)//P75(2)	1993
ZQ162	Yumai4	Henan	Funo radiated by Co-60	1985
ZQ163	Fengyou6	Henan	Zhou 8934(Zhou 8846/Bian 8579-2)	2001
ZQ164	Yanshi16	Henan	Yanshi(1)-0-3-1/Yumai 10	2001
ZQ165	Zhengyou 6	Henan	891×8826/5418	1999
ZQ167	Yumai58	Henan	394A/Siyang 1883	1999
ZQ168	Jimai20	Shandong	Lumai 14/884187	2003
ZQ169	Luo10T07	Henan	Zhoumai 16/Xinmai 18	Regional test
ZQ170	FS059	Henan	Zhoumai 16/FS94	Regional test
ZQ171	Zaoxiang158	Henan	Aikang 59/Tongzhoumai 916	2015
ZQ172	Tainong8968	Shandong	Tainong 2101/PH1521	Regional test
ZQ173	Xuke168	Henan	Xuke 316/04zhong36	2014
ZQ174	Lunxuan1298	Henan	Shimai 12/Lunxuan 987	Regional test
ZQ175	Luomai28	Henan	Luomai 21/ Aikang 58	2015
ZQ176	Wen0418	Henan	Zhoumai 16/Xinmai 9408	Regional test
ZQ177	Huaichuan919	Henan	Wenmai 4/ Zhoumai 16/Xianyang 151	2015
ZQ178	Fanmai7030	Henan	Zhengmai 9023/ Zhoumai 18	2015
ZQ179	Junda106	Henan	Zhongyu 9/Zhoumai 16	2015
ZQ180	Huayumai118	Henan	Yumai 52/Xinmai 9//Zhoumai 16	Regional test
ZQ181	Pumai053	Henan	Aikang 58/ Zhoumai 18	2015
ZQ182	Shangmai156	Henan	Xunong 5/Aikang 58	2015
ZQ183	Xuke793	Henan	Zhoumai 16/Luo 5356	Regional test
ZQ184	Cunmai11	Henan	Zhoumai 22/ Zhoumai 24	2015
ZQ185	Hongmai118	Henan	Xinong 88/Shanyou 211	Regional test
ZQ186	Taihemai1	Henan	Zhoumai 18/Bainong 64	2015
ZQ187	Fanmai803	Henan	Han 6172/ Zhoumai 16	2015
ZQ188	Wenliang1	Henan	Yumai 18/ Zhoumai 16	Regional test
ZQ189	Bainong418	Henan	Zhoumai 18/Aikang 58// Aikang 58	2015
ZQ190	Huangming116	Henan	Yanzhan 4110/Zhoumai 16	2015
ZQ191	Jiyanmai7	Henan	Zhengmai 366/Ji 05-5053	Regional test
ZQ192	Zhongchuang805	Henan	Yumai 18/Shang 01-0179// Zhoumai 9	Regional test
ZQ193	Yanmai864	Henan	Zhengmai 9023//Bainong 64/Yanmai 8942	2015
ZQ194	Xianmai13	Henan	Yumai 64/Zhongyu 5	2016
ZQ195	Yamai1	Henan	Pumai 9 pedigree selection	2015
ZQ196	Mengmai023	Henan	Zhoumai 13/Yanke 956	2015
ZQ197	Lankao182	Henan	Aibian 1/Octoploid Thinopyruminternedium 4	Regional test
ZQ198	Shannong 29	Shandong	Linmai 6 /J1781	2016
ZQ199	Xinong889	Shaanxi	E han-4×(Xiaoyan 6×Xiaoyan 83352)F1	2005
ZQ200	Xinong9871	Shaanxi	Xinong 2208/Xiaoyan	2008
ZQ201	Xinong529	Shaanxi	Mianyang 26/Xiaoyan 597	2013
ZQ202	Zhoumai30	Henan	Zhoumai 23/Zhoumai 18-15	2016
ZQ203	Zhengpinmai8	Henan	(Aikang 58/Zhoumai 18)F1mutation	2016
ZQ204	Yanmai8911	Shaanxi	8222-6pedigree selection	1997
ZQ205	Xiaoyan22	Shaanxi	(Xiaoyan 6/775-1)/ Xiaoyan 107	1998
ZQ206	Ruiquanmai168	Unknown	Zhoumai 16/Yumai 13	Regional test
ZQ207	Yan99102	Shandong	Yanhangxuan 2 /Lin 9511F1//Yan 14-15	2011

## Sheet: Sheet2
Table S2. Primer sequences used for quantitative real-time RT-PCR (qRT-PCR)
Gene name	Forward primer (5’-3’)	Reverse primer (5’-3’)
β-actin	GAACCTCCACTGAGAACAACATTACC	GTTCCAATCTATGAGGGATACACGC
TaCRK6-VIGS	GCTCCCAGATCTTCAGCGAG	CGGCCGTTCTTGATCTCCTT
TraesCS1A02G422700-EMS	TGCGACTACAGCAAGGTGG	AGGCAGCAGAATAATAAGAACCA
TraesCS1A02G422700	GCTTCGGCGTCATGGTTCTT	GTCCAACACCGTTCTTGCCA
TraesCS1B02G454000	CTTCTCAGAGAGCGGCTTGC	CGGTATCGCTTCCGAGCATC
TraesCS1D02G430900	ACTCTTGCACGCTCCACTAC	ACACCATGATCTTGGCGAGG
TraesCS1A02G414600	AGATCTACAAGTCCATCGTCGC	GATCGATCAACATGACGCACATAC
TraesCS1D02G392500	ATACGTCCACACCCACAACA	CTTCGCACTTGGAAGCATCAG
TraesCS1D02G411300	GCTCCCAGATCTTCAGCGAG	CGGCCGTTCTTGATCTCCTT
TraesCS1D02G428200	CCCCGAGGTGCTCCAGAAGT	GACCATTGATGCGGAACCCT
TraesCS4A02G459400	GCCTACAACACTGGAGCTGATG	CGGAAACCACACTGCGTGAGAG
TraesCS4A02G462300	GCAGTGACCGTTCCAGTTGAGG	AGAACTCATCGTCAATCGGCACAC
TraesCS4A02G482100	GGCACTTCCGCAACTACCTCATG	GCAGAGCATCATCCTCCTCCTTTG
TraesCS4A02G488300	TTGACAACTTTGTGCCCCCT	ACCGAGGTGCTACAACAGTG
TraesCS1B02G035100	GACATGCCTGACGCCGACATC	CGATGATGCGGACACGGTTGG
TraesCS5A02G111400	CGGTCGTTGGTAGAAACTGGAGTG	GGAAGCAGCCCACCCATCAATG
TraesCS5B02G299600	TTCAGGTGTTCGAGGCTGTCAATG	CCGCAACTCGTTCAGCATCTCC
TraesCS7D02G000700	CGTTGCGAGCACAGGAAGAGG	TCACCTCATCCACCTCTGCTTCC
TraesCS1D02G009100	GCAACGACGCTGACAAGGATAG	AGTCCGCCATTACCGTACCATC
TraesCSU02G005600	GCCAACCAAGTCACTGTTGC	AACAAGGTTTGCATCGGCAG
TraesCS1A02G422900	TGCCACCATTGTCAACCAGG	AGGCGTAGTCCAGTGCATTC
TraesCS4B02G313400	GCATCCCAAACCCAAAGCAC	GACGAAGGTAGCAGCTCTGG
TraesCS1B02G456900	AAGACACGGCTGTGGATGTC	ATCTTTGCAGCTGTGTCCGT

## Sheet: Sheet3
Table S3. The genetic positions of SNPs are associated with radical/primary length of wheat (log10(P)>3.5 under four environments
SNP marker genetic position(Mb)	number of SNP				Range-lg(p)	R2 (%)Range
	IHC	17-OHC	18-OHC	19-OHC
1A,570.13-579.22	2	1	1		3.50-4.56	7.02-12.39
1A,493.01				1	4.23	12.02
1B,633.24-645.02			4		4.01-4.33	10.90-12.13
1D,460.79-482.24	1		2	1	3.81-4.38	7.69-11.65
2A,38.81-71.37		2			3.68-4.29	8.00-12.32
2A,510.81	1				3.57	7.15
2B,26.58				1	4.52	13.85
2B,448.25	1				3.61609	9.19
2B ,682.18		1			3.76574	11.262
2B,750.31-750.34			2		4.04-4.07	8.91-8.93
2B,794.49		1			3.86315	11.467
2D,18.17				1	4.06251	11.521
3A,473.71	1				3.65573	9.534
3A,710.26				1	5.08186	14.618
3A,561.03-510.14				2	4.92-4.21	14.33-12.61
3A,514.27		1			4.2065	11.954
3B,729.49-730.24		1		1	3.96-4.20	9.83-10.76
4A,671.33-674.54			6		4.02-4.61	10.81-12.30
4A,722.12-740.88	4	2	1	5	3.54-4.69	8.95-14.04
4B,26.49	1				4.12787	8.483
4B,640.10-642.92	5				3.62-4.56	7.36-9.64
4D,498.18	1				3.79436	7.674
4D,32.23	1				3.61363	7.176
5A,411.67			1		4.18863	11.22
5B,313.15				1	4.3585	12.492
5B,400.67-420.73	1			2	4.15-4.20	11.79-11.83
5B,455.74	1				3.72033	7.439
5B,663.97				2	4.04-4.89	11.43-13.51
5B,691.38			2		4.08-4.56	11.53-12.32
5D,544.75			1		4.53007	10.21
6A,2.75-18.60			1	6	4.00-4.75	11.4813.18
6B,58.77			1		4.10846	10.941
6B,717.89			1		4.01039	9.964
6B,486.23				1	4.11469	12.008
6D,386.94		1			3.5981	9.674
7A,7.59-10.20		1	1	2	3.86-4.34	11.79-12.35
7A,85.34			1		4.07784	11.078
7A,598.21		1			3.58443	7.855
7B,686.98	1				3.53297	10.254
7D,2.90		1			3.97196	11.538
ns,417.50	1				3.77937	9.699
ns,1.88	1				3.73264	7.642
ns???

## Sheet: Sheet4
Table S4. RNA-Seq reads quality control result parameters
Sample_name	Raw read(M)	Clean read(M)	clean_base(Gb)	Clean read q20(%)	Cleanread q30(%)	Clean read ratio(%)	Total map(%)
WRL1_1	111.32	101.62	10.16	97.59	89.65	91.29	92.6
WRL1_2	111.37	101.56	10.16	97.78	90.41	91.19	92.22
WRL1_3	111.51	102.77	10.28	97.94	90.77	92.16	92.59
WRL2_1	112.84	103.04	10.3	98.02	90.94	91.32	92.23
WRL2_2	112.87	102.65	10.27	97.7	89.99	90.95	92.35
WRL2_3	112.57	101.31	10.13	97.94	90.74	90	92.48
WRS1_1	112.83	102.1	10.21	97.87	90.47	90.49	91.59
WRS1_2	112.74	101.47	10.15	97.79	90.25	90	91.33
WRS1_3	112.89	102.28	10.23	97.85	90.38	90.6	91.16
WRS2_1	111.43	101.79	10.18	97.98	91.02	91.34	90.69
WRS2_2	111.42	101.42	10.14	97.46	89.39	91.03	90.88
WRS2_3	111.38	101.26	10.13	97.95	90.9	90.91	90.82

## Sheet: Sheet12
Table S5. Expressions and annotation of DEGs in four comparable comple
Gene ID	WRL1_1 FPKM	WRL1_2 FPKM	WRL1_3 FPKM	WRL2_1 FPKM	WRL2_2 FPKM	WRL2_3 FPKM	WRS1_1 FPKM	WRS1_2 FPKM	WRS1_3 FPKM	WRS2_1 FPKM	WRS2_2 FPKM	WRS2_3 FPKM	log2(WRS1/WRL1)	Pvalue(WRL1-vs-WRS1)	log2(WRS2/WRL1)	Pvalue(WRL1-vs-WRS2)	log2(WRS1/WRL2)	Pvalue(WRL2-vs-WRS1)	log2(WRS2/WRL2)	Pvalue(WRL2-vs-WRS2)	log2(WRS/WRL)	Pvalue(WRL-vs-WRS)	TFs	PRG	Kegg Orthology	Nr	GO
TraesCS4B02G139700	8.03	5.7	4.86	6.26	9.46	9.46	26.55	32.13	21.29	13.79	15.42	10.62	2.13405	0	1.12934	3.28977e-162	1.66207	0	0.657356	1.41945e-65	1.46641	0		Medicago truncatula NBS resistance protein (MTR_4g055630) mRNA, complete cds	K14209//solute carrier family 36 (proton-coupled amino acid transporter);K15015//solute carrier family 32 (vesicular inhibitory amino acid transporter);K14209//solute carrier family 36 (proton-coupled amino acid transporter)	EMT08824.1|2.3e-255|hypothetical protein F775_30855 [Aegilops tauschii]
TraesCS1A02G189300	5.14	3.66	2.38	5.17	10.86	6.74	16.9	21.16	10.63	15.48	12.98	14.11	2.1265	0	1.93391	1.26996e-272	1.09454	9.68983e-135	0.901955	8.98785e-86	1.43004	0			K22020//mucin-19	XP_020176368.1|2.1e-212|uncharacterized protein LOC109761971 [Aegilops tauschii subsp. tauschii]	GO:0003824//catalytic activity;GO:0016787//hydrolase activity;
TraesCS5A02G232700	1.44	1.27	0.79	0.95	0.81	1.06	3.1	2.43	2.32	3.53	2.51	4.06	1.16687	2.45599e-25	1.53227	1.12092e-47	1.47805	1.34725e-35	1.84344	3.98272e-61	1.50643	3.01821e-81			K09338//homeobox-leucine zipper protein	XP_020148543.1|3.5e-167|homeobox-leucine zipper protein HOX11-like [Aegilops tauschii subsp. tauschii]	GO:0009987//cellular process;GO:0009058//biosynthetic process;GO:0046483//heterocycle metabolic process;GO:0032774//RNA biosynthetic process;GO:0010467//gene expression;GO:0044249//cellular biosynthetic process;GO:0006139//nucleobase-containing compound metabolic process;GO:1901362//organic cyclic compound biosynthetic process;GO:0043170//macromolecule metabolic process;GO:0006807//nitrogen compo…
TraesCS7B02G233400	6.35	2.17	2.38	2.74	6.81	2.81	10.87	17.32	13.16	6	9.06	4.05	1.93467	9.12051e-57	0.836556	1.53111e-08	1.72579	1.3521e-48	0.627677	1.12761e-05	1.38325	1.51777e-51				XP_010227644.1|1.2e-31|PREDICTED: uncharacterized protein LOC104581546 [Brachypodium distachyon]
TraesCS3A02G359500	6.67	2.93	2.73	1.95	3.78	1.81	18.16	24.1	11.18	3.78	10.12	1.99	2.11546	5.19664e-187	0.373876	0.000144705	2.81359	1.15094e-257	1.072	5.92942e-22	1.80344	3.36565e-196			K01803//triosephosphate isomerase (TIM) [EC:5.3.1.1]+ko00010//Glycolysis / Gluconeogenesis+ko01230//Biosynthesis of amino acids+ko01100//Metabolic pathways+ko00051//Fructose and mannose metabolism+ko01110//Biosynthesis of secondary metabolites+ko00710//Carbon fixation in photosynthetic organisms+ko01200//Carbon metabolism+ko00562//Inositol phosphate metabolism;K12486//stromal membrane-associated …	EMS48714.1|6.9e-87|Elicitor-responsive protein 1 [Triticum urartu]
TraesCS2B02G040600	1.53	0.32	0.37	4.33	11.68	1.14	7.38	5.03	2.21	4.85	35.75	1.4	2.72445	1.005e-154	4.25475	0	-0.232029	0.000171362	1.29827	2.09725e-164	1.55322	4.27404e-289			K13496//UDP-glucosyl transferase 73C [EC:2.4.1.-]	ADA71978.1|2.6e-277|UDP-glucosyltransferase [Triticum aestivum]
TraesCS4A02G352700	2.11	1.75	1.08	1.5	1.55	1.13	4.55	4.55	3.64	1.62	1.96	2.02	1.37118	5.93773e-53	0.185784	0.0920565	1.60539	3.87523e-66	0.419996	0.000264165	1.0123	4.08792e-47	C2H2		K13412//calcium-dependent protein kinase [EC:2.7.11.1]+ko04626//Plant-pathogen interaction;K17987//next to BRCA1 gene 1 protein	XP_020188988.1|4.8e-212|zinc finger protein STAR3-like [Aegilops tauschii subsp. tauschii]	GO:0043620//regulation of DNA-templated transcription in response to stress;GO:0010556//regulation of macromolecule biosynthetic process;GO:0051173//positive regulation of nitrogen compound metabolic process;GO:0051252//regulation of RNA metabolic process;GO:0051254//positive regulation of RNA metabolic process;GO:0010035//response to inorganic substance;GO:0031328//positive regulation of cellula…
TraesCS2B02G062500	3.18	3.13	2.65	3.85	4.16	4.08	9.98	9.84	9.72	6.72	4.41	7.77	1.7231	2.14349e-125	1.08233	1.22948e-40	1.28272	2.97817e-81	0.64196	1.54517e-17	1.20411	6.62484e-120			K00430//peroxidase [EC:1.11.1.7]+ko01100//Metabolic pathways+ko01110//Biosynthesis of secondary metabolites+ko00940//Phenylpropanoid biosynthesis;K08360//cytochrome b-561 [EC:1.16.5.1]	XP_020190173.1|6.6e-145|putative methyltransferase DDB_G0268948 [Aegilops tauschii subsp. tauschii]	GO:0042221//response to chemical;GO:0050896//response to stimulus;GO:0010038//response to metal ion;GO:0032259//methylation;GO:0046686//response to cadmium ion;GO:0010035//response to inorganic substance;GO:0008152//metabolic process;GO:0005622//intracellular;GO:0044444//cytoplasmic part;GO:0005739//mitochondrion;GO:0044424//intracellular part;GO:0005737//cytoplasm;GO:0043226//organelle;GO:004322…
TraesCS2B02G060900	5.99	5.09	5.6	4.85	4.9	4.36	14.3	15.8	13.84	5.61	7.07	5.13	1.399	0	0.1004	0.0122572	1.6368	0	0.338209	6.63562e-16	1.00842	0		P-loop containing nucleoside triphosphate hydrolases superfamily protein (best arabidopsis hit); white-brown complex homolog protein, putative, expressed (best rice hit)	K05681//ATP-binding cassette, subfamily G (WHITE), member 2+ko02010//ABC transporters;K21396//ATP-binding cassette, subfamily G (WHITE), eye pigment precursor transporter;K05681//ATP-binding cassette, subfamily G (WHITE), member 2+ko02010//ABC transporters;K21396//ATP-binding cassette, subfamily G (WHITE), eye pigment precursor transporter;K05681//ATP-binding cassette, subfamily G (WHITE), member…	AOV85919.1|0.0e+00|ABCG8, partial [Triticum polonicum]	GO:0044464//cell part;GO:0005886//plasma membrane;GO:0005623//cell;GO:0016020//membrane;GO:0016021//integral component of membrane;GO:0044425//membrane part;GO:0031224//intrinsic component of membrane;GO:0071944//cell periphery;GO:0022857//transmembrane transporter activity;GO:0043167//ion binding;GO:0017111//nucleoside-triphosphatase activity;GO:0016787//hydrolase activity;GO:0043492//ATPase act…
TraesCS7D02G429000	9.64	6.46	8.1	12.83	19.38	16.54	47.02	59.27	44.46	10.65	16.79	8.64	2.64241	0	0.589287	1.59219e-14	1.61773	3.00003e-283	-0.43539	1.37631e-11	1.36032	1.13915e-272			K07213//copper chaperone	PAN06295.1|1.4e-34|hypothetical protein PAHAL_A01981 [Panicum hallii]	GO:0006811//ion transport;GO:0006812//cation transport;GO:0051179//localization;GO:0051234//establishment of localization;GO:0006810//transport;GO:0030001//metal ion transport;GO:0043169//cation binding;GO:0043167//ion binding;GO:0046872//metal ion binding;GO:0005488//binding;
BGI_novel_G012750	3.73	3.83	3	0	0	0.09	2.25	1.23	0.87	18.6	15.09	37.96	-1.27094	9.78358e-14	2.77463	6.27481e-234	5.62943	2.54316e-23	9.675	9.47578e-259	2.83258	5.11324e-252
TraesCS2B02G569500	2.35	2.26	2.03	1.09	2.37	2.22	24.75	24.46	21.13	1.69	2.33	2.12	3.40945	0	-0.102646	0.417415	3.62336	0	0.111265	0.398124	2.64078	0			K22020//mucin-19	EMS65281.1|2.5e-84|hypothetical protein TRIUR3_32617 [Triticum urartu]
TraesCS2B02G369100	0.9	0.6	0.61	1.44	3.55	1.34	4.34	4.04	3.48	4.65	7.92	2.9	2.49375	2.1702e-72	2.88575	2.36063e-109	0.8966	1.71057e-17	1.28861	6.15745e-39	1.69611	1.12619e-100			K01183//chitinase [EC:3.2.1.14]+ko00520//Amino sugar and nucleotide sugar metabolism+ko01100//Metabolic pathways	AAD28733.1|1.0e-165|chitinase IV precursor [Triticum aestivum]
TraesCS2A02G031400	1.03	0.21	0.3	1.2	3.29	1.29	3.84	6.73	1.75	2.23	3.87	1.16	2.82454	0	2.1974	2.34577e-194	1.05038	3.60692e-103	0.423238	7.7789e-15	1.40633	3.22124e-266			K15078//structure-specific endonuclease subunit SLX1 [EC:3.6.1.-];K15078//structure-specific endonuclease subunit SLX1 [EC:3.6.1.-]	EMS49548.1|0.0e+00|Putative disease resistance RPP13-like protein 1 [Triticum urartu]	GO:0050789//regulation of biological process;GO:0050794//regulation of cellular process;GO:0009987//cellular process;GO:0006952//defense response;GO:0065007//biological regulation;GO:0007154//cell communication;GO:0050896//response to stimulus;GO:0007165//signal transduction;GO:0051716//cellular response to stimulus;GO:0006950//response to stress;GO:0023052//signaling;GO:0071944//cell periphery;G…
BGI_novel_G011455	3.47	3.62	3.45	0.35	0.14	0.7	3.34	2.2	3.27	4.82	4.16	7.84	-0.258776	0.00192497	0.677327	1.76319e-21	2.87683	8.57335e-89	3.81293	1.35694e-211	1.12011	2.95775e-72			K02184//formin 2;K00430//peroxidase [EC:1.11.1.7]+ko01100//Metabolic pathways+ko01110//Biosynthesis of secondary metabolites+ko00940//Phenylpropanoid biosynthesis
TraesCS7D02G041500	1.38	1.04	0.86	1.16	1.12	0.61	3.56	3.96	2.91	6.27	6.65	4.94	1.66752	2.1022e-52	2.4471	1.52462e-143	1.8465	7.75602e-60	2.62608	1.84597e-154	2.19322	2.84468e-198			K16040//trans-resveratrol di-O-methyltransferase [EC:2.1.1.240]+ko00945//Stilbenoid, diarylheptanoid and gingerol biosynthesis	XP_020177482.1|7.2e-207|flavonoid O-methyltransferase-like protein Os11g0303600 [Aegilops tauschii subsp. tauschii]
TraesCS5D02G395800	15.89	6.32	5.59	11.58	26.77	9.55	39.97	46.96	21.44	13.6	23.96	7.99	1.96866	0	0.725224	1.2028e-32	1.17203	2.49176e-165	-0.0714124	0.179646	1.02989	8.83892e-191			K01870//isoleucyl-tRNA synthetase [EC:6.1.1.5]+ko00970//Aminoacyl-tRNA biosynthesis;K17987//next to BRCA1 gene 1 protein	XP_020193121.1|3.5e-94|dirigent protein 22-like [Aegilops tauschii subsp. tauschii]
TraesCS1D02G433200	1.34	1.21	1.16	0.66	0.81	1.23	5.96	5.46	4.31	2.54	2.04	3.27	2.08726	3.89305e-172	1.08434	4.27729e-34	2.54196	1.71275e-216	1.53904	3.8517e-57	1.88273	5.84215e-224				XP_020151237.1|0.0e+00|S-type anion channel SLAH2-like [Aegilops tauschii subsp. tauschii]
TraesCS3A02G495300	16.47	5.74	6	8.16	16.53	6.17	28.77	42.51	21.96	10.67	15.45	7.09	1.61638	0	0.231819	6.78643e-10	1.4793	0	0.094738	0.00998653	1.01841	0			K00858//NAD+ kinase [EC:2.7.1.23]+ko01100//Metabolic pathways+ko00760//Nicotinate and nicotinamide metabolism;K00858//NAD+ kinase [EC:2.7.1.23]+ko01100//Metabolic pathways+ko00760//Nicotinate and nicotinamide metabolism;K00858//NAD+ kinase [EC:2.7.1.23]+ko01100//Metabolic pathways+ko00760//Nicotinate and nicotinamide metabolism	XP_020195586.1|4.2e-301|probable NAD kinase 1 isoform X1 [Aegilops tauschii subsp. tauschii]	GO:0051188//cofactor biosynthetic process;GO:1901564//organonitrogen compound metabolic process;GO:0006739//NADP metabolic process;GO:0006793//phosphorus metabolic process;GO:0090407//organophosphate biosynthetic process;GO:0044249//cellular biosynthetic process;GO:0009058//biosynthetic process;GO:0072525//pyridine-containing compound biosynthetic process;GO:0072524//pyridine-containing compound …
TraesCS6B02G167700	1.24	1.38	1.06	0.84	0.91	0.74	4.44	4.34	3.8	1.8	1.83	1.69	1.77333	9.70262e-70	0.53796	1.63488e-05	2.33277	3.83429e-98	1.09739	1.7224e-15	1.53916	1.22673e-80			K21952//CASK-interacting protein;K21952//CASK-interacting protein	XP_020167940.1|5.7e-223|uncharacterized protein LOC109753454 [Aegilops tauschii subsp. tauschii]
TraesCS4A02G172600	1.97	0.59	1.04	0.51	1.8	3.01	9.31	2.06	2.96	2.78	2.28	0.93	1.9929	5.15423e-83	0.738613	9.55862e-09	1.42883	2.47827e-52	0.174549	0.135772	1.19361	3.36868e-56			K08235//xyloglucan:xyloglucosyl transferase [EC:2.4.1.207]	XP_020170870.1|3.9e-175|probable xyloglucan endotransglucosylase/hydrolase [Aegilops tauschii subsp. tauschii]	GO:0071554//cell wall organization or biogenesis;GO:0044085//cellular component biogenesis;GO:0044237//cellular metabolic process;GO:0045229//external encapsulating structure organization;GO:0005976//polysaccharide metabolic process;GO:0008152//metabolic process;GO:0005975//carbohydrate metabolic process;GO:0010383//cell wall polysaccharide metabolic process;GO:0043170//macromolecule metabolic pr…
TraesCS3D02G341100	22.2	18.73	18.21	18.28	22.46	20.16	57.48	65.56	54.73	42.68	38.01	40.85	1.58898	0	1.04226	0	1.54259	0	0.995866	0	1.3198	0	WRKY		K13424//WRKY transcription factor 33+ko04016//MAPK signaling pathway - plant+ko04626//Plant-pathogen interaction	XP_020154000.1|0.0e+00|WRKY transcription factor WRKY24-like [Aegilops tauschii subsp. tauschii]
TraesCS2A02G355300	1.12	0.92	0.79	1.27	1.39	1.17	2.21	2.83	1.11	3.03	2.8	2	1.12479	3.6278e-25	1.47516	5.34826e-47	0.687477	9.32306e-12	1.03784	1.1459e-27	1.07535	5.00256e-51			K00430//peroxidase [EC:1.11.1.7]+ko01100//Metabolic pathways+ko01110//Biosynthesis of secondary metabolites+ko00940//Phenylpropanoid biosynthesis	BAJ87785.1|1.0e-251|predicted protein [Hordeum vulgare subsp. vulgare]	GO:0044237//cellular metabolic process;GO:0016043//cellular component organization;GO:0071554//cell wall organization or biogenesis;GO:0006979//response to oxidative stress;GO:0009056//catabolic process;GO:0071555//cell wall organization;GO:0050896//response to stimulus;GO:0051186//cofactor metabolic process;GO:0009987//cellular process;GO:0009664//plant-type cell wall organization;GO:0042737//dr…
TraesCS6B02G201900	1.9	2.12	1.88	1.49	2.04	2.26	1.13	1.21	1.25	9.85	8.87	12.12	-0.705356	8.50325e-09	2.39305	2.26326e-243	-0.69449	1.64982e-08	2.40392	1.75487e-243	1.55053	6.50746e-153			K12844//U4/U6 small nuclear ribonucleoprotein PRP31+ko03040//Spliceosome;K12844//U4/U6 small nuclear ribonucleoprotein PRP31+ko03040//Spliceosome	KXG34004.2|7.5e-87|hypothetical protein SORBI_3003G405400 [Sorghum bicolor]
TraesCS2A02G576600	2.29	2.73	1.92	3.25	2.4	3.07	3.8	4.17	4.1	6.77	6.19	8.14	0.80016	3.82061e-20	1.60955	7.69517e-100	0.463545	1.7815e-08	1.27294	2.09748e-70	1.08109	3.64928e-85				XP_020173198.1|7.0e-157|uncharacterized protein LOC109758743 [Aegilops tauschii subsp. tauschii]
TraesCS4B02G312300	8.88	4.99	3.89	3.41	5.77	2.35	16.88	16.25	9.07	5.36	11.6	4.37	1.25351	6.59159e-171	0.273507	3.13995e-07	1.86928	6.90915e-304	0.889275	2.79331e-50	1.12199	1.11063e-214			K20771//carlactone C-19 oxidase [EC:1.14.-.-]	EMT27245.1|2.9e-285|Thromboxane-A synthase [Aegilops tauschii]
TraesCS3D02G234300	57.18	36.33	40.35	41.14	44.48	43.16	112.53	163.6	83.24	61.25	69.85	55.21	1.42586	0	0.478359	0	1.47942	0	0.531918	0	1.05783	0		Hordeum vulgare subsp. vulgare mRNA for predicted protein, partial cds, clone: NIASHv2129I14	K05681//ATP-binding cassette, subfamily G (WHITE), member 2+ko02010//ABC transporters;K05681//ATP-binding cassette, subfamily G (WHITE), member 2+ko02010//ABC transporters;K05681//ATP-binding cassette, subfamily G (WHITE), member 2+ko02010//ABC transporters;K05681//ATP-binding cassette, subfamily G (WHITE), member 2+ko02010//ABC transporters	XP_015648329.1|0.0e+00|PREDICTED: ABC transporter G family member 37 isoform X1 [Oryza sativa Japonica Group]	GO:0051234//establishment of localization;GO:0006810//transport;GO:0051179//localization;GO:0005886//plasma membrane;GO:0031224//intrinsic component of membrane;GO:0071944//cell periphery;GO:0016021//integral component of membrane;GO:0044425//membrane part;GO:0005623//cell;GO:0044464//cell part;GO:0016020//membrane;GO:0032555//purine ribonucleotide binding;GO:0017111//nucleoside-triphosphatase ac…
TraesCS2D02G545100	3.44	4.02	2.64	2.29	3.16	4.76	8.75	11.33	9.36	8.93	5.7	5.44	1.5455	4.48609e-177	0.996959	8.15902e-62	1.52425	9.90761e-173	0.975706	1.97923e-59	1.28825	6.46854e-225			K03006//DNA-directed RNA polymerase II subunit RPB1 [EC:2.7.7.6]+ko03020//RNA polymerase	XP_017699548.1|6.5e-134|PREDICTED: uncharacterized protein At4g06744-like [Phoenix dactylifera]
TraesCS3D02G019500	1.19	0.76	0.55	0.98	2.92	1.72	6.12	8.34	2.28	3.49	3.43	1.57	2.75044	3.47992e-89	1.77508	1.45331e-27	1.57125	1.6015e-44	0.595884	7.85434e-06	1.64243	1.34873e-70			K00430//peroxidase [EC:1.11.1.7]+ko01100//Metabolic pathways+ko01110//Biosynthesis of secondary metabolites+ko00940//Phenylpropanoid biosynthesis;K14325//RNA-binding protein with serine-rich domain 1+ko03015//mRNA surveillance pathway+ko03013//RNA transport	XP_020191748.1|1.1e-82|uncharacterized protein LOC109777535 [Aegilops tauschii subsp. tauschii]
TraesCS7A02G387100	1.99	1.06	1.07	2.05	3.65	3.54	25.56	31.59	11.11	12.52	18.39	8.4	4.05651	0	3.2627	0	2.88622	0	2.09241	0	3.01793	0			K01592//tyrosine decarboxylase [EC:4.1.1.25]+ko00350//Tyrosine metabolism+ko01100//Metabolic pathways+ko00950//Isoquinoline alkaloid biosynthesis+ko01110//Biosynthesis of secondary metabolites	EMS51668.1|1.3e-291|Aromatic-L-amino-acid decarboxylase [Triticum urartu]
TraesCS2D02G165600	0	0	0.06	27.24	25.69	11.68	27.59	38.18	11.99	17.36	29.4	6.25	10.3976	3.83821e-207	9.85473	9.72599e-154	0.254628	1.35531e-05	-0.288288	7.82925e-06	1.01586	6.48242e-87				EMT29637.1|8.5e-32|hypothetical protein F775_42796 [Aegilops tauschii]
TraesCS5A02G337500	3.61	1.43	1.31	1.21	3.26	2.12	20.97	27.04	8.01	3.28	9.32	2.32	3.14669	0	1.24253	3.70973e-56	3.08818	0	1.18403	6.30419e-52	2.46416	0			K13065//shikimate O-hydroxycinnamoyltransferase [EC:2.3.1.133]+ko01100//Metabolic pathways+ko01110//Biosynthesis of secondary metabolites+ko00940//Phenylpropanoid biosynthesis+ko00941//Flavonoid biosynthesis+ko00945//Stilbenoid, diarylheptanoid and gingerol biosynthesis	XP_020187682.1|1.3e-252|putrescine hydroxycinnamoyltransferase 3-like [Aegilops tauschii subsp. tauschii]
TraesCSU02G024200	7.42	4.21	4.88	2.68	4.05	6.44	23.28	15.3	9.04	7.72	7.78	5.02	1.53244	7.65173e-248	0.31931	1.51369e-08	1.85491	0	0.641782	7.21773e-27	1.2049	5.91022e-245			K13229//2,4-dihydroxy-1,4-benzoxazin-3-one-glucoside dioxygenase [EC:1.14.20.2]+ko00402//Benzoxazinoid biosynthesis;K06892//feruloyl-CoA ortho-hydroxylase [EC:1.14.11.-]+ko01110//Biosynthesis of secondary metabolites+ko00940//Phenylpropanoid biosynthesis;K13229//2,4-dihydroxy-1,4-benzoxazin-3-one-glucoside dioxygenase [EC:1.14.20.2]+ko00402//Benzoxazinoid biosynthesis;K06892//feruloyl-CoA ortho-h…	XP_020181284.1|4.1e-217|DIBOA-glucoside dioxygenase BX6-like [Aegilops tauschii subsp. tauschii]	GO:0043169//cation binding;GO:0043167//ion binding;GO:0046872//metal ion binding;GO:0005488//binding;GO:0003824//catalytic activity;GO:0016491//oxidoreductase activity;
TraesCS3A02G454900	1.21	0.79	0.8	1.04	1.12	1.13	2.83	3.31	1.92	3.93	3.53	2.96	1.52534	1.32896e-37	1.89736	1.90149e-64	1.28887	2.18056e-29	1.66089	1.1747e-53	1.59963	2.80324e-89			K01674//carbonic anhydrase [EC:4.2.1.1]+ko00910//Nitrogen metabolism;K02184//formin 2	PAN26651.1|3.1e-128|hypothetical protein PAHAL_C03969 [Panicum hallii]	GO:0015979//photosynthesis;GO:0008152//metabolic process;GO:0009987//cellular process;GO:0044237//cellular metabolic process;GO:0044424//intracellular part;GO:0019898//extrinsic component of membrane;GO:0005623//cell;GO:0044464//cell part;GO:1902494//catalytic complex;GO:0044436//thylakoid part;GO:0009654//photosystem II oxygen evolving complex;GO:0042651//thylakoid membrane;GO:0044425//membrane …
TraesCS6D02G231200	1.38	1.73	1.21	0.91	1.74	1.69	3.58	2.29	4.97	3.84	2.99	1.91	1.32731	3.1647e-39	1.02528	1.01473e-21	1.31022	2.62327e-38	1.00819	4.47164e-21	1.17661	1.15655e-57			K20628//expansin	XP_020186299.1|1.5e-167|expansin-B11-like [Aegilops tauschii subsp. tauschii]	GO:0044703//multi-organism reproductive process;GO:0051704//multi-organism process;GO:0000003//reproduction;GO:0019953//sexual reproduction;GO:0022414//reproductive process;GO:0005576//extracellular region;
TraesCS6A02G259200	22.29	18.71	15.19	22.4	30.3	19.68	53.63	65.34	43.04	34.7	31.23	35.43	1.53069	0	0.856641	1.02821e-157	1.15779	0	0.483743	3.56877e-58	1.03719	0		RING/U-box superfamily protein (best arabidopsis hit)	K16281//RING-H2 zinc finger protein RHA1;K22020//mucin-19	XP_020155380.1|1.0e-77|E3 ubiquitin-protein ligase RHA2A-like [Aegilops tauschii subsp. tauschii]
TraesCS5B02G177500	2.18	2.17	1.35	3.77	3.59	3.49	10.62	9.76	6.13	3.39	2.39	3.89	2.22199	4.72589e-146	0.766813	5.97355e-12	1.28439	2.98351e-68	-0.170793	0.0721063	1.13332	2.31337e-76			K16812//targeting protein for Xklp2	XP_020172442.1|1.4e-109|protein TPX2 [Aegilops tauschii subsp. tauschii]	GO:0051247//positive regulation of protein metabolic process;GO:0031325//positive regulation of cellular metabolic process;GO:0080090//regulation of primary metabolic process;GO:0050794//regulation of cellular process;GO:0010564//regulation of cell cycle process;GO:0032886//regulation of microtubule-based process;GO:0032147//activation of protein kinase activity;GO:0010604//positive regulation of…
TraesCS2D02G545000	11.4	12.66	10.98	8.97	10.34	9.87	28.31	43.42	29.94	14.26	15.73	11.99	1.53895	0	0.268072	4.9175e-09	1.79628	0	0.525396	7.51883e-28	1.16524	0			K00899//5-methylthioribose kinase [EC:2.7.1.100]+ko01100//Metabolic pathways+ko00270//Cysteine and methionine metabolism	AEV40970.1|2.3e-212|putative methylthioribose kinase [Oryza punctata]	GO:0034599//cellular response to oxidative stress;GO:1901701//cellular response to oxygen-containing compound;GO:1902170//cellular response to reactive nitrogen species;GO:0006979//response to oxidative stress;GO:1901700//response to oxygen-containing compound;GO:0000096//sulfur amino acid metabolic process;GO:0050896//response to stimulus;GO:1901698//response to nitrogen compound;GO:0009086//met…
TraesCS2A02G043600	5.26	3.24	3.53	3.21	5.76	2.82	15.72	33.8	8.13	5.47	5.77	3.84	2.26722	5.93813e-234	0.336776	0.000537898	2.28501	4.90096e-235	0.354572	0.000290048	1.61748	2.41503e-188	WRKY	NB-ARC domain-containing disease resistance protein (best arabidopsis hit); RGH2B, putative, expressed (best rice hit)	K13426//WRKY transcription factor 29+ko04016//MAPK signaling pathway - plant+ko04626//Plant-pathogen interaction;K13457//disease resistance protein RPM1+ko04626//Plant-pathogen interaction;K13425//WRKY transcription factor 22+ko04016//MAPK signaling pathway - plant+ko04626//Plant-pathogen interaction	XP_020195143.1|1.2e-134|probable WRKY transcription factor 62 [Aegilops tauschii subsp. tauschii]
TraesCS3B02G383900	4.74	2.75	2.87	2.72	1.59	1.98	4.66	3.06	5.23	10.79	8.14	11.68	0.218513	0.00167733	1.72543	2.80356e-226	0.876542	3.29159e-29	2.38346	0	1.44627	4.11004e-236			K05277//leucoanthocyanidin dioxygenase [EC:1.14.11.19]+ko01100//Metabolic pathways+ko01110//Biosynthesis of secondary metabolites+ko00941//Flavonoid biosynthesis;K05278//flavonol synthase [EC:1.14.11.23]+ko01100//Metabolic pathways+ko01110//Biosynthesis of secondary metabolites+ko00941//Flavonoid biosynthesis;K05278//flavonol synthase [EC:1.14.11.23]+ko01100//Metabolic pathways+ko01110//Biosynthe…	XP_020194494.1|1.7e-211|probable 2-oxoglutarate-dependent dioxygenase At5g05600 [Aegilops tauschii subsp. tauschii]
TraesCS7D02G175900	1.78	1.45	0.75	1.25	2.23	1.51	4.93	3.07	3.58	3.7	3.59	2.74	1.54357	1.06297e-53	1.34285	3.35504e-38	1.20796	2.54646e-37	1.00725	1.20068e-24	1.27059	1.03427e-73			K05894//12-oxophytodienoic acid reductase [EC:1.3.1.42]+ko00592//alpha-Linolenic acid metabolism+ko01100//Metabolic pathways+ko01110//Biosynthesis of secondary metabolites;K05894//12-oxophytodienoic acid reductase [EC:1.3.1.42]+ko00592//alpha-Linolenic acid metabolism+ko01100//Metabolic pathways+ko01110//Biosynthesis of secondary metabolites	EMT21133.1|1.8e-144|12-oxophytodienoate reductase 2 [Aegilops tauschii]
TraesCS2B02G289900	33.06	20.07	20.97	21.7	35.28	32.83	104.73	116.04	86.73	75.99	72.25	73.54	2.05513	0	1.58638	0	1.77232	0	1.30357	0	1.69353	0			K13422//transcription factor MYC2+ko04016//MAPK signaling pathway - plant+ko04075//Plant hormone signal transduction	XP_020160196.1|4.3e-146|transcription factor bHLH35-like [Aegilops tauschii subsp. tauschii]	GO:0005515//protein binding;GO:0005488//binding;GO:0046983//protein dimerization activity;
TraesCS7A02G084800	1.19	0.72	0.45	1.77	2.35	0.96	4.75	4.96	2.87	2.73	4.94	0.6	2.53279	7.87683e-102	1.89709	1.44748e-46	1.43201	1.98058e-48	0.796318	3.8418e-13	1.60123	3.44369e-92			K16040//trans-resveratrol di-O-methyltransferase [EC:2.1.1.240]+ko00945//Stilbenoid, diarylheptanoid and gingerol biosynthesis;K16040//trans-resveratrol di-O-methyltransferase [EC:2.1.1.240]+ko00945//Stilbenoid, diarylheptanoid and gingerol biosynthesis	XP_020175101.1|2.5e-202|probable O-methyltransferase 2 [Aegilops tauschii subsp. tauschii]
TraesCS4A02G242800	2.55	1.82	1.47	1.49	2.35	2.42	6.83	7.95	4.78	3.04	2.44	3.92	1.74562	1.01789e-99	0.687411	4.29742e-12	1.64087	4.24249e-91	0.582656	2.45328e-09	1.26156	4.78925e-91			K14963//COMPASS component SWD3;K16794//platelet-activating factor acetylhydrolase IB subunit alpha+ko01100//Metabolic pathways+ko00565//Ether lipid metabolism	XP_020159033.1|3.8e-253|protein JINGUBANG-like [Aegilops tauschii subsp. tauschii]
TraesCS2A02G495500	3.47	3.98	3.16	6.08	6.37	10.25	7.95	6.06	9.76	17.35	13.96	17.11	1.16417	4.65982e-41	2.19789	1.71294e-200	0.0573272	0.424524	1.09105	2.07228e-73	1.11402	2.36089e-112			K14560//U3 small nucleolar ribonucleoprotein protein IMP3+ko03008//Ribosome biogenesis in eukaryotes	XP_020164589.1|8.9e-99|U3 small nucleolar ribonucleoprotein protein IMP3 [Aegilops tauschii subsp. tauschii]	GO:0022613//ribonucleoprotein complex biogenesis;GO:0034641//cellular nitrogen compound metabolic process;GO:0006725//cellular aromatic compound metabolic process;GO:0071840//cellular component organization or biogenesis;GO:0042254//ribosome biogenesis;GO:0043170//macromolecule metabolic process;GO:0044238//primary metabolic process;GO:0016072//rRNA metabolic process;GO:0008152//metabolic process…
TraesCS6B02G152300	2.21	1.21	1.8	1.51	2.34	1.59	2.83	4.94	2.41	4.84	5.44	3.25	0.96521	5.26876e-49	1.37853	3.76054e-112	0.903251	7.87949e-44	1.31657	3.73531e-104	1.15416	4.24424e-148		Leucine-rich receptor-like protein kinase family protein (best arabidopsis hit); phytosulfokine receptor precursor, putative, expressed (best rice hit)	K13415//protein brassinosteroid insensitive 1 [EC:2.7.10.1 2.7.11.1]+ko04075//Plant hormone signal transduction	XP_020153880.1|0.0e+00|tyrosine-sulfated glycopeptide receptor 1-like [Aegilops tauschii subsp. tauschii]
TraesCS4A02G065100	5.13	3.47	2.74	4.64	6.76	5.46	16.27	26.51	11.21	8.44	9.96	7.15	2.25599	0	1.17972	7.04175e-70	1.6767	8.25883e-246	0.60043	3.42813e-23	1.50206	0			K00547//homocysteine S-methyltransferase [EC:2.1.1.10]+ko01100//Metabolic pathways+ko01110//Biosynthesis of secondary metabolites+ko00270//Cysteine and methionine metabolism	OEL35641.1|5.4e-164|Homocysteine S-methyltransferase 1 [Dichanthelium oligosanthes]
TraesCS5B02G224000	0.45	0.4	0.18	1.48	2.87	1.34	5.08	3.05	4.52	0.61	0.72	0.97	3.63239	1.12389e-138	1.17457	1.30541e-07	1.14566	6.80481e-34	-1.31216	1.4219e-19	1.16118	1.01402e-40		Disease resistance protein (TIR-NBS-LRR class) (best arabidopsis hit)	K18835//WRKY transcription factor 2+ko04626//Plant-pathogen interaction;K18834//WRKY transcription factor 1+ko04626//Plant-pathogen interaction;K13424//WRKY transcription factor 33+ko04016//MAPK signaling pathway - plant+ko04626//Plant-pathogen interaction	XP_020147443.1|4.6e-179|WRKY transcription factor WRKY76-like [Aegilops tauschii subsp. tauschii]
TraesCS5B02G392400	1.13	1.29	1.25	1.55	1.47	1.22	4.15	3.98	3.95	2.92	4.26	2.29	1.72371	6.01851e-38	1.38067	3.3501e-22	1.50118	2.96778e-31	1.15814	3.55491e-17	1.44842	8.58984e-52			K08832//serine/threonine-protein kinase SRPK3 [EC:2.7.11.1];K22020//mucin-19	XP_020169983.1|2.7e-95|uncharacterized protein LOC109755489 [Aegilops tauschii subsp. tauschii]	GO:0016020//membrane;GO:0044425//membrane part;GO:0031224//intrinsic component of membrane;GO:0016021//integral component of membrane;
TraesCS5A02G234200	1.89	2.01	1.02	1.03	2.02	0.82	3.86	5.32	4.52	5.02	5.31	5.1	1.48132	4.91863e-86	1.65748	3.6792e-113	1.82129	2.14352e-114	1.99745	8.33725e-145	1.73072	8.67478e-225			K05933//aminocyclopropanecarboxylate oxidase [EC:1.14.17.4]+ko01100//Metabolic pathways+ko01110//Biosynthesis of secondary metabolites+ko00270//Cysteine and methionine metabolism	XP_020169459.1|4.5e-173|1-aminocyclopropane-1-carboxylate oxidase 1-like [Aegilops tauschii subsp. tauschii]
TraesCS2D02G285300	28.94	18.19	19.68	25.97	42.87	31.37	75.16	91.64	47.54	54.05	55.09	53.02	1.53762	0	1.25338	0	0.926077	0	0.641835	1.28608e-177	1.06688	0	Tify		K13464//jasmonate ZIM domain-containing protein+ko04075//Plant hormone signal transduction;K13464//jasmonate ZIM domain-containing protein+ko04075//Plant hormone signal transduction;K13464//jasmonate ZIM domain-containing protein+ko04075//Plant hormone signal transduction	XP_020151845.1|8.6e-88|protein TIFY 9-like [Aegilops tauschii subsp. tauschii]	GO:0060255//regulation of macromolecule metabolic process;GO:1903507//negative regulation of nucleic acid-templated transcription;GO:0031326//regulation of cellular biosynthetic process;GO:2001141//regulation of RNA biosynthetic process;GO:0051253//negative regulation of RNA metabolic process;GO:0031323//regulation of cellular metabolic process;GO:0019219//regulation of nucleobase-containing comp…
BGI_novel_G002827	11.97	9.99	8.54	12.87	15.24	10.8	56.34	74.59	41.04	21.13	20.62	18.79	2.49902	0	0.994313	1.0672e-177	2.14154	0	0.636835	3.61038e-83	1.74997	0			K01807//ribose 5-phosphate isomerase A [EC:5.3.1.6]+ko00030//Pentose phosphate pathway+ko01230//Biosynthesis of amino acids+ko01100//Metabolic pathways+ko01110//Biosynthesis of secondary metabolites+ko00710//Carbon fixation in photosynthetic organisms+ko01200//Carbon metabolism		GO:0055086//nucleobase-containing small molecule metabolic process;GO:0009117//nucleotide metabolic process;GO:0051156//glucose 6-phosphate metabolic process;GO:0019362//pyridine nucleotide metabolic process;GO:0044237//cellular metabolic process;GO:0009052//pentose-phosphate shunt, non-oxidative branch;GO:0019637//organophosphate metabolic process;GO:0009987//cellular process;GO:0046496//nicotin…
TraesCS2A02G380800	37.25	26.29	18.99	32.6	53.01	46.5	124.91	174.45	67.63	75.8	78.27	67.96	2.1574	0	1.43195	0	1.47477	0	0.749324	0	1.46232	0			K10775//phenylalanine ammonia-lyase [EC:4.3.1.24]+ko01100//Metabolic pathways+ko01110//Biosynthesis of secondary metabolites+ko00940//Phenylpropanoid biosynthesis+ko00360//Phenylalanine metabolism;K10775//phenylalanine ammonia-lyase [EC:4.3.1.24]+ko01100//Metabolic pathways+ko01110//Biosynthesis of secondary metabolites+ko00940//Phenylpropanoid biosynthesis+ko00360//Phenylalanine metabolism;K1077…	XP_003580144.1|0.0e+00|PREDICTED: phenylalanine ammonia-lyase [Brachypodium distachyon]	GO:0009063//cellular amino acid catabolic process;GO:1901605//alpha-amino acid metabolic process;GO:0042737//drug catabolic process;GO:0019748//secondary metabolic process;GO:0046394//carboxylic acid biosynthetic process;GO:0044550//secondary metabolite biosynthetic process;GO:0044248//cellular catabolic process;GO:0044237//cellular metabolic process;GO:1901576//organic substance biosynthetic pro…
TraesCS2B02G499700	4.35	3.25	2.21	3.35	5.56	6.34	20.75	26.76	10.43	8.88	10.28	5.58	2.56848	8.02238e-218	1.34798	1.3589e-40	1.91889	3.5919e-152	0.698393	1.19919e-14	1.72773	3.15804e-188				BAD81861.1|2.0e-13|unknown protein [Oryza sativa Japonica Group]
TraesCS2B02G508000	0.97	0.61	0.52	1.79	3.84	1.18	3.99	5.09	2.99	1.93	2.64	1.34	2.52154	7.51797e-84	1.49648	7.2314e-22	0.820216	2.80293e-17	-0.204848	0.0780141	1.01681	3.36245e-35			K08695//anthocyanidin reductase [EC:1.3.1.77]+ko01110//Biosynthesis of secondary metabolites+ko00941//Flavonoid biosynthesis	EMS62021.1|3.0e-182|Anthocyanidin reductase [Triticum urartu]
TraesCS2B02G464700	3.52	1.79	1.8	1.88	2.56	1.99	7.65	9.5	3.46	3.09	3.18	3.43	1.53892	4.74407e-134	0.450068	2.70798e-09	1.68173	2.33159e-151	0.592875	2.42488e-14	1.16745	1.16152e-128			K14638//solute carrier family 15 (peptide/histidine transporter), member 3/4	XP_003580417.1|5.5e-280|PREDICTED: protein NRT1/ PTR FAMILY 8.3-like [Brachypodium distachyon]	GO:0031224//intrinsic component of membrane;GO:0044425//membrane part;GO:0016021//integral component of membrane;GO:0016020//membrane;GO:0005215//transporter activity;
TraesCS3D02G211500	0.24	0.2	0.36	3.4	2.83	4.47	4.58	2.96	5.02	4.24	3.83	4.24	3.9732	0	3.94771	0	0.228096	1.59133e-05	0.202608	0.000142051	1.11765	1.43848e-143			K12309//beta-galactosidase [EC:3.2.1.23]+ko00600//Sphingolipid metabolism+ko00604//Glycosphingolipid biosynthesis - ganglio series+ko00531//Glycosaminoglycan degradation+ko00511//Other glycan degradation+ko01100//Metabolic pathways+ko00052//Galactose metabolism;K12309//beta-galactosidase [EC:3.2.1.23]+ko00600//Sphingolipid metabolism+ko00604//Glycosphingolipid biosynthesis - ganglio series+ko0053…	XP_020147370.1|0.0e+00|beta-galactosidase 2 [Aegilops tauschii subsp. tauschii]	GO:0005975//carbohydrate metabolic process;GO:0008152//metabolic process;GO:0044238//primary metabolic process;GO:0071704//organic substance metabolic process;GO:0030312//external encapsulating structure;GO:0005622//intracellular;GO:0071944//cell periphery;GO:0043229//intracellular organelle;GO:0005773//vacuole;GO:0044424//intracellular part;GO:0005618//cell wall;GO:0044444//cytoplasmic part;GO:0…
TraesCS4A02G144500	4.41	3.76	3.74	1.76	1.93	1.24	4.75	7.13	3.44	6.68	7.86	5.42	0.366358	1.314e-05	0.753156	1.29837e-21	1.62958	1.99895e-54	2.01638	2.57984e-93	1.06619	6.88541e-65			K02933//large subunit ribosomal protein L6+ko03010//Ribosome	BAJ84917.1|1.8e-125|predicted protein [Hordeum vulgare subsp. vulgare]	GO:0048856//anatomical structure development;GO:0043043//peptide biosynthetic process;GO:0044271//cellular nitrogen compound biosynthetic process;GO:0009058//biosynthetic process;GO:0007275//multicellular organism development;GO:0010154//fruit development;GO:0043170//macromolecule metabolic process;GO:0003006//developmental process involved in reproduction;GO:0061458//reproductive system developm…
TraesCS4D02G134900	2.19	0.98	0.63	0.73	2.4	0.84	5.61	8.16	2.61	3.85	5.95	1.3	2.11333	5.70712e-122	1.55683	2.75426e-55	2.04287	2.53274e-116	1.48637	1.61368e-51	1.82799	9.53988e-168			K02960//small subunit ribosomal protein S16e+ko03010//Ribosome;K13171//serine/arginine repetitive matrix protein 1+ko03015//mRNA surveillance pathway+ko03013//RNA transport;K21867//potassium channel;K17987//next to BRCA1 gene 1 protein	AAF71272.1|7.6e-250|ribulose bisphosphate carboxylase activase B [Triticum aestivum]	GO:0043229//intracellular organelle;GO:0044444//cytoplasmic part;GO:0009507//chloroplast;GO:0009532//plastid stroma;GO:0044464//cell part;GO:0044435//plastid part;GO:0043231//intracellular membrane-bounded organelle;GO:0005622//intracellular;GO:0044446//intracellular organelle part;GO:0044424//intracellular part;GO:0044434//chloroplast part;GO:0044422//organelle part;GO:0009570//chloroplast strom…
BST_chr1A_nlr_80	0	0	0.01	1.58	2.89	1.83	4.03	5.75	3.74	0.23	0.33	0.22	9.8748	0	5.75223	9.16048e-27	1.11305	2.57428e-83	-3.00953	1.37638e-143	1.20523	3.82237e-100		NB-ARC domain-containing disease resistance protein (best arabidopsis hit); disease resistance protein RPM1, putative, expressed (best rice hit)	K13457//disease resistance protein RPM1+ko04626//Plant-pathogen interaction;K13457//disease resistance protein RPM1+ko04626//Plant-pathogen interaction	XP_020156667.1|0.0e+00|disease resistance protein RPM1-like [Aegilops tauschii subsp. tauschii]
TraesCS1A02G359100	7.6	7.92	7.39	9.47	10.84	9.03	27.75	31.69	20.01	15.42	11.73	18.42	1.79729	0	0.99539	2.42776e-101	1.43413	0	0.632229	3.79181e-47	1.26171	0			K08818//cell division cycle 2-like [EC:2.7.11.22]	BAK06703.1|1.5e-172|predicted protein [Hordeum vulgare subsp. vulgare]	GO:0051347//positive regulation of transferase activity;GO:0044093//positive regulation of molecular function;GO:0045937//positive regulation of phosphate metabolic process;GO:0051247//positive regulation of protein metabolic process;GO:1904029//regulation of cyclin-dependent protein kinase activity;GO:0033674//positive regulation of kinase activity;GO:0048522//positive regulation of cellular pro…
TraesCS4B02G313200	1.66	1.31	0.73	0.68	1.42	3.52	17.99	7.49	10.29	6.57	6.03	3.26	3.2775	2.42818e-114	2.11758	4.94339e-33	2.65226	6.4262e-93	1.49233	6.57482e-21	2.46981	8.49692e-124			K11855//ubiquitin carboxyl-terminal hydrolase 36/42 [EC:3.4.19.12]	XP_020152838.1|5.2e-53|cortical cell-delineating protein-like [Aegilops tauschii subsp. tauschii]
TraesCS4B02G286600	6.95	3.88	3.13	5.15	6.44	2.26	40.55	54.72	19.98	7.65	10.92	3.39	3.05073	0	0.663123	3.33311e-33	3.05465	0	0.667045	2.21842e-33	2.31116	0			K13412//calcium-dependent protein kinase [EC:2.7.11.1]+ko04626//Plant-pathogen interaction;K17987//next to BRCA1 gene 1 protein	BAK02816.1|6.1e-238|predicted protein [Hordeum vulgare subsp. vulgare]	GO:0009056//catabolic process;GO:0044238//primary metabolic process;GO:1901575//organic substance catabolic process;GO:0006629//lipid metabolic process;GO:0016042//lipid catabolic process;GO:0008152//metabolic process;GO:0071704//organic substance metabolic process;GO:0044424//intracellular part;GO:0005622//intracellular;GO:0044464//cell part;GO:0016020//membrane;GO:0005737//cytoplasm;GO:0005623/…
TraesCS3D02G500100	0.98	1.09	0.36	1.56	2.18	1.26	2.9	3.26	2.06	2.73	2.79	3.73	1.76784	1.33262e-13	1.94957	4.51055e-17	0.700809	0.000427965	0.882532	5.03986e-06	1.23343	1.54121e-16			K13448//calcium-binding protein CML+ko04626//Plant-pathogen interaction	XP_006645375.1|6.3e-48|PREDICTED: probable calcium-binding protein CML31 [Oryza brachyantha]	GO:0043169//cation binding;GO:0046872//metal ion binding;GO:0043167//ion binding;GO:0005488//binding;GO:0005509//calcium ion binding;
TraesCS2B02G553800	10.64	7.85	6.74	1.33	1.51	2.48	81.69	59.46	50.66	6.1	5.66	6.15	2.93251	0	-0.477288	8.67071e-06	5.15626	0	1.74646	2.34139e-28	2.78547	0				EMS57843.1|1.0e-29|hypothetical protein TRIUR3_03115 [Triticum urartu]
TraesCS4D02G232700	1.43	1.39	1.31	1.9	2.13	1.18	6.6	7.68	4.46	5.61	4.48	4.87	2.18308	1.83721e-167	1.86036	8.94281e-109	1.8409	7.66943e-134	1.51818	1.1766e-81	1.85134	4.86104e-241			K01580//glutamate decarboxylase [EC:4.1.1.15]+ko00410//beta-Alanine metabolism+ko00250//Alanine, aspartate and glutamate metabolism+ko00430//Taurine and hypotaurine metabolism+ko01100//Metabolic pathways+ko00650//Butanoate metabolism+ko01110//Biosynthesis of secondary metabolites;K01580//glutamate decarboxylase [EC:4.1.1.15]+ko00410//beta-Alanine metabolism+ko00250//Alanine, aspartate and glutama…	EMT04913.1|1.3e-309|Glutamate decarboxylase 1 [Aegilops tauschii]	GO:1901605//alpha-amino acid metabolic process;GO:0044237//cellular metabolic process;GO:0043436//oxoacid metabolic process;GO:0006807//nitrogen compound metabolic process;GO:0009064//glutamine family amino acid metabolic process;GO:0008152//metabolic process;GO:1901564//organonitrogen compound metabolic process;GO:0006536//glutamate metabolic process;GO:0071704//organic substance metabolic proce…
TraesCS5D02G133300	9.7	7.97	6.82	4.84	8.99	8.29	23.62	24.81	22.58	13.67	12.41	12.5	1.53796	1.05715e-201	0.663529	4.05821e-29	1.67673	4.00737e-227	0.802303	1.01242e-39	1.23607	1.56821e-222			K17987//next to BRCA1 gene 1 protein;K08360//cytochrome b-561 [EC:1.16.5.1]	PAN16103.1|1.1e-94|hypothetical protein PAHAL_C00487 [Panicum hallii]	GO:0050896//response to stimulus;GO:0006952//defense response;GO:0006950//response to stress;GO:0044425//membrane part;GO:0005623//cell;GO:0031226//intrinsic component of plasma membrane;GO:0044464//cell part;GO:0046658//anchored component of plasma membrane;GO:0071944//cell periphery;GO:0005911//cell-cell junction;GO:0055044//symplast;GO:0031224//intrinsic component of membrane;GO:0044459//plasm…
TraesCS5A02G165400	27.01	25.22	18.6	24.62	49.59	19.57	38.83	75.83	36.85	73.35	89.22	34.84	1.10089	0	1.48927	0	0.686988	1.03898e-139	1.07537	0	1.08613	0			K01602//ribulose-bisphosphate carboxylase small chain [EC:4.1.1.39]+ko01100//Metabolic pathways+ko00710//Carbon fixation in photosynthetic organisms+ko01200//Carbon metabolism+ko00630//Glyoxylate and dicarboxylate metabolism;K01602//ribulose-bisphosphate carboxylase small chain [EC:4.1.1.39]+ko01100//Metabolic pathways+ko00710//Carbon fixation in photosynthetic organisms+ko01200//Carbon metabolis…	CAA10497.1|3.1e-77|hypothetical protein [Secale cereale]
TraesCS3D02G191300	1	1.41	1.07	2.63	2.25	1.87	9.15	1.27	6.13	1.61	1.27	2.73	2.2475	1.06869e-100	0.688983	6.71678e-07	1.28649	8.10804e-47	-0.272024	0.0207818	1.11681	4.10262e-50			K20628//expansin	XP_020171192.1|1.2e-143|expansin-A11-like [Aegilops tauschii subsp. tauschii]
TraesCS2D02G088100	15.42	6.56	8.23	2.65	4.93	2.82	32.59	51.83	22.46	8.21	9.25	4.65	1.82762	0	-0.439102	6.35865e-10	3.3543	0	1.08758	9.74885e-32	1.67282	0				XP_020182764.1|8.2e-107|zinc finger protein ZAT6-like [Aegilops tauschii subsp. tauschii]	GO:0043229//intracellular organelle;GO:0043231//intracellular membrane-bounded organelle;GO:0043226//organelle;GO:0005634//nucleus;GO:0043227//membrane-bounded organelle;GO:0005622//intracellular;GO:0044424//intracellular part;GO:0044464//cell part;GO:0005623//cell;GO:1901363//heterocyclic compound binding;GO:0003676//nucleic acid binding;GO:0097159//organic cyclic compound binding;GO:0005488//bi…
TraesCS5B02G270300	1.31	1.14	1.4	1.01	0.79	1.39	5.5	4.51	2.6	2.81	2.27	2.33	1.71857	4.30004e-45	0.955103	7.94973e-12	1.979	5.25179e-54	1.21553	1.0396e-16	1.51284	7.83533e-59			K13171//serine/arginine repetitive matrix protein 1+ko03015//mRNA surveillance pathway+ko03013//RNA transport	XP_020165433.1|4.3e-89|uncharacterized protein LOC109750921 [Aegilops tauschii subsp. tauschii]
BGI_novel_G002948	12.46	11.23	9.87	12.64	13.61	11.59	26.64	36.19	19.2	22.21	18.89	26.64	1.29359	7.82467e-232	1.01864	8.81115e-131	1.11209	4.79201e-182	0.837153	3.6242e-94	1.07036	0			K05747//Wiskott-Aldrich syndrome protein+ko04144//Endocytosis
BGI_novel_G011053	0	0	0	2.37	1.9	2.29	1.96	1.89	2.6	2.07	2.48	3.92	10.3292	7.43615e-101	10.7219	2.70174e-123	-0.0265722	0.74201	0.366129	1.29803e-06	1.18875	1.86544e-73			K11420//euchromatic histone-lysine N-methyltransferase [EC:2.1.1.43]+ko00310//Lysine degradation
TraesCS7B02G089400	36.52	21.69	24.86	19.06	33.29	25.92	95.3	132.18	70.08	42.46	49.57	35.99	1.84369	0	0.630177	4.00178e-121	1.92344	0	0.709925	2.37327e-148	1.40369	0			K00891//shikimate kinase [EC:2.7.1.71]+ko01230//Biosynthesis of amino acids+ko01100//Metabolic pathways+ko01110//Biosynthesis of secondary metabolites+ko00400//Phenylalanine, tyrosine and tryptophan biosynthesis	XP_020198259.1|6.1e-155|shikimate kinase 2, chloroplastic-like [Aegilops tauschii subsp. tauschii]	GO:0009423//chorismate biosynthetic process;GO:0046417//chorismate metabolic process;GO:0032787//monocarboxylic acid metabolic process;GO:0044281//small molecule metabolic process;GO:0044249//cellular biosynthetic process;GO:0006082//organic acid metabolic process;GO:0019632//shikimate metabolic process;GO:0043436//oxoacid metabolic process;GO:0044283//small molecule biosynthetic process;GO:00081…
TraesCS2D02G589300	1.04	0.8	0.62	1.26	2.49	1.09	4.86	4.9	2.37	2.56	2.7	2.61	2.3085	5.60438e-57	1.6877	2.20426e-25	1.31921	5.05593e-27	0.698417	3.36498e-07	1.45761	2.36667e-50			K00799//glutathione S-transferase [EC:2.5.1.18]+ko00480//Glutathione metabolism	EMT21594.1|1.3e-121|hypothetical protein F775_27374 [Aegilops tauschii]
TraesCS2A02G332600	2.83	4.12	3.03	6.13	8.15	11.51	27.93	28.73	26.17	14.48	10.64	16.39	2.86003	4.38983e-275	1.89606	2.09342e-87	1.51242	2.83855e-123	0.54845	5.09191e-13	1.63729	3.96649e-208			K10523//speckle-type POZ protein;K19307//25S rRNA (uracil2634-N3)-methyltransferase [EC:2.1.1.313];K04733//interleukin-1 receptor-associated kinase 4 [EC:2.7.11.1];K10523//speckle-type POZ protein;K19307//25S rRNA (uracil2634-N3)-methyltransferase [EC:2.1.1.313];K04733//interleukin-1 receptor-associated kinase 4 [EC:2.7.11.1]	EMS57367.1|8.1e-58|hypothetical protein TRIUR3_01185 [Triticum urartu]
TraesCS4D02G184900	1.4	0.69	0.46	1.6	3.82	1.74	53.82	92.51	39.08	4.76	10.42	3.14	6.18782	0	2.85496	4.09344e-186	4.69265	0	1.35978	9.33385e-72	4.40188	0			K05953//nicotianamine synthase [EC:2.5.1.43]	AND77085.1|1.2e-220|nicotianamine synthase [Triticum aestivum]
TraesCS1D02G078700	2.27	2.97	1.9	0.56	0.28	0.69	3.87	2.83	2.09	2.59	1.99	4.38	0.308093	0.0762277	0.345245	0.0462162	2.50059	9.41457e-23	2.53774	1.57226e-23	1.03684	8.35163e-14				EMT31737.1|9.9e-36|hypothetical protein F775_00045 [Aegilops tauschii]
TraesCS3A02G000600	3.61	2	2.17	3.55	5.07	4.33	14.6	13.82	13.01	5.69	5.94	5.9	2.41496	1.83523e-224	1.1793	3.1276e-36	1.67112	3.26641e-139	0.435465	1.38731e-07	1.51164	2.41505e-171			K00430//peroxidase [EC:1.11.1.7]+ko01100//Metabolic pathways+ko01110//Biosynthesis of secondary metabolites+ko00940//Phenylpropanoid biosynthesis;K13171//serine/arginine repetitive matrix protein 1+ko03015//mRNA surveillance pathway+ko03013//RNA transport	EMS45882.1|2.6e-110|hypothetical protein TRIUR3_14872 [Triticum urartu]
TraesCSU02G244200	1.91	0.58	1.19	0.69	1.85	0.8	2.64	3.94	3.76	3.48	3.77	2.92	1.48777	4.78444e-34	1.47037	6.57075e-33	1.62103	3.4378e-38	1.60362	5.64198e-37	1.54392	3.58346e-69			K01739//cystathionine gamma-synthase [EC:2.5.1.48]+ko00920//Sulfur metabolism+ko01230//Biosynthesis of amino acids+ko00450//Selenocompound metabolism+ko01100//Metabolic pathways+ko01110//Biosynthesis of secondary metabolites+ko00270//Cysteine and methionine metabolism	EMS47533.1|6.9e-173|Cystathionine gamma-synthase, chloroplastic [Triticum urartu]
BGI_novel_G010688	3.09	1.5	1.55	1	2.34	1.97	6.54	8.04	6.64	4.2	4.62	3.05	1.78962	1.10153e-131	0.956299	2.10545e-29	1.99347	3.24436e-151	1.16016	1.64661e-39	1.53272	9.93722e-164	AP2-EREBP	Malus x domestica AP2 domain class transcription factor (AP2D43) mRNA, complete cds	K09286//EREBP-like factor
TraesCS5A02G416900	4.5	3.22	3.14	2.54	3.96	3.99	11.37	11.17	9.2	4.83	4.92	2.63	1.55188	3.42265e-58	0.203945	0.0953171	1.58817	7.66354e-60	0.240238	0.0514413	1.05184	1.37109e-44				EMT00933.1|6.0e-57|Ribose-5-phosphate isomerase A [Aegilops tauschii]
TraesCS1D02G411300	1.7	1.39	0.77	0.77	2.39	0.44	8.36	18.38	8.46	10.13	9.53	3.6	3.19606	0	2.60484	1.74412e-174	3.2816	0	2.69038	9.2408e-180	2.9743	0			K08912//light-harvesting complex II chlorophyll a/b binding protein 1+ko01100//Metabolic pathways+ko00196//Photosynthesis - antenna proteins	XP_020147764.1|6.9e-153|chlorophyll a-b binding protein of LHCII type 1-like [Aegilops tauschii subsp. tauschii]	GO:0044237//cellular metabolic process;GO:0009314//response to radiation;GO:0006091//generation of precursor metabolites and energy;GO:0019684//photosynthesis, light reaction;GO:0015979//photosynthesis;GO:0044238//primary metabolic process;GO:0071704//organic substance metabolic process;GO:0006807//nitrogen compound metabolic process;GO:0043412//macromolecule modification;GO:1901564//organonitrog…
TraesCS5D02G385100	2.71	2.03	1.84	2.17	2.95	2.35	4.54	5.81	3.51	5.84	5.9	4.3	1.07701	2.47542e-76	1.28913	5.98194e-116	0.891533	5.17428e-56	1.10365	1.27618e-90	1.09102	6.36015e-165		Leucine-rich repeat protein kinase family protein (best arabidopsis hit)	K03063//26S proteasome regulatory subunit T3+ko03050//Proteasome;K00430//peroxidase [EC:1.11.1.7]+ko01100//Metabolic pathways+ko01110//Biosynthesis of secondary metabolites+ko00940//Phenylpropanoid biosynthesis;K02184//formin 2;K21952//CASK-interacting protein	XP_020152789.1|0.0e+00|BTB/POZ domain-containing protein At1g30440 [Aegilops tauschii subsp. tauschii]
TraesCS3B02G003700	8.94	6.05	6.81	0.89	0.82	1.97	13.62	11.9	15.27	9.74	9.59	11.05	0.910857	2.00111e-62	0.488685	1.14019e-16	3.45807	0	3.0359	2.26737e-239	1.48378	1.10423e-230	bHLH			CDM80015.1|6.6e-113|unnamed protein product [Triticum aestivum]
TraesCS7B02G460000	1.73	2.28	1.68	2.66	4.12	3.25	11.1	9.95	7.41	0.14	0.14	0.1	2.83312	0	-3.67661	5.04326e-87	2.02208	0	-4.48765	5.26209e-169	1.39787	2.00344e-198			K04733//interleukin-1 receptor-associated kinase 4 [EC:2.7.11.1];K04733//interleukin-1 receptor-associated kinase 4 [EC:2.7.11.1];K04733//interleukin-1 receptor-associated kinase 4 [EC:2.7.11.1];K04733//interleukin-1 receptor-associated kinase 4 [EC:2.7.11.1];K04733//interleukin-1 receptor-associated kinase 4 [EC:2.7.11.1];K04733//interleukin-1 receptor-associated kinase 4 [EC:2.7.11.1]	XP_020165057.1|8.0e-138|putative receptor-like protein kinase At4g00960 [Aegilops tauschii subsp. tauschii]
TraesCS4A02G397800	1.34	1.9	2.05	2.53	1.66	1.72	9.45	10.08	11.09	1.95	1.12	1.96	2.24211	6.41125e-254	0.0858308	0.371363	2.09257	5.19399e-232	-0.0637145	0.49691	1.46353	6.85004e-174			K15442//tRNA-specific adenosine deaminase 3;K15442//tRNA-specific adenosine deaminase 3;K15442//tRNA-specific adenosine deaminase 3;K15442//tRNA-specific adenosine deaminase 3	XP_003557193.1|1.1e-186|PREDICTED: probable inactive tRNA-specific adenosine deaminase-like protein 3 isoform X2 [Brachypodium distachyon]	GO:0006139//nucleobase-containing compound metabolic process;GO:0006807//nitrogen compound metabolic process;GO:0034641//cellular nitrogen compound metabolic process;GO:1901360//organic cyclic compound metabolic process;GO:0090304//nucleic acid metabolic process;GO:0009987//cellular process;GO:0044260//cellular macromolecule metabolic process;GO:0044238//primary metabolic process;GO:0071704//orga…
TraesCS6D02G247100	6.28	3.47	3.6	2.65	3.6	2.61	10.2	13.79	8.3	3.81	5.07	4.63	1.27738	7.79479e-156	0.0218723	0.714962	1.86391	6.04812e-268	0.608407	5.45672e-20	1.04812	1.23548e-160			K14638//solute carrier family 15 (peptide/histidine transporter), member 3/4	XP_020191941.1|0.0e+00|protein NRT1/ PTR FAMILY 8.3-like isoform X1 [Aegilops tauschii subsp. tauschii]
TraesCS6A02G315800	3.51	5.59	2.89	4.6	3.59	3.95	7.24	6.98	7.09	15.64	10.47	18.21	0.833387	5.77348e-23	1.89461	4.08662e-159	0.80309	1.48985e-21	1.86431	5.38525e-155	1.44108	4.17063e-159			K03006//DNA-directed RNA polymerase II subunit RPB1 [EC:2.7.7.6]+ko03020//RNA polymerase	EMS59519.1|8.9e-126|Blue copper protein [Triticum urartu]	GO:0044459//plasma membrane part;GO:0016020//membrane;GO:0005886//plasma membrane;GO:0005623//cell;GO:0031225//anchored component of membrane;GO:0031224//intrinsic component of membrane;GO:0031226//intrinsic component of plasma membrane;GO:0071944//cell periphery;GO:0044425//membrane part;GO:0046658//anchored component of plasma membrane;GO:0016021//integral component of membrane;GO:0044464//cell…
TraesCS4A02G008500	1.52	1.31	0.79	0.61	1.89	1.21	2.9	2.74	1.86	3.31	2.45	2.85	1.05333	1.01017e-16	1.25646	1.48778e-24	1.01017	1.20572e-15	1.2133	3.18848e-23	1.13619	3.90095e-38			K08233//polyneuridine-aldehyde esterase [EC:3.1.1.78]	XP_020167944.1|1.6e-143|salicylic acid-binding protein 2-like [Aegilops tauschii subsp. tauschii]
TraesCS7B02G137500	3.2	1.4	2.71	0	0	0	5.24	6.4	5.43	0	0	0	1.2227	9.60303e-37	-9.15633	3.45037e-55	10.416	4.36934e-106			1.22494	7.14059e-37			K01872//alanyl-tRNA synthetase [EC:6.1.1.7]+ko00970//Aminoacyl-tRNA biosynthesis	XP_020172192.1|2.8e-181|alanine--tRNA ligase-like [Aegilops tauschii subsp. tauschii]
TraesCS5A02G182000	0.8	1.03	0.74	1.16	1.66	0.83	2.24	2.9	2.02	1.39	1.72	1.95	1.48685	7.19977e-27	0.988801	6.72635e-11	1.0227	1.45258e-15	0.52466	0.0001811	1.01121	4.85814e-25		Medicago truncatula NBS-LRR resistance-like protein 4U (MTR_4g080080) mRNA, complete cds	K10712//cysteamine dioxygenase [EC:1.13.11.19]+ko00430//Taurine and hypotaurine metabolism+ko01100//Metabolic pathways;K10712//cysteamine dioxygenase [EC:1.13.11.19]+ko00430//Taurine and hypotaurine metabolism+ko01100//Metabolic pathways	XP_020201449.1|5.2e-130|plant cysteine oxidase 5-like [Aegilops tauschii subsp. tauschii]	GO:0003824//catalytic activity;GO:0016701//oxidoreductase activity, acting on single donors with incorporation of molecular oxygen;GO:0016491//oxidoreductase activity;GO:0016702//oxidoreductase activity, acting on single donors with incorporation of molecular oxygen, incorporation of two atoms of oxygen;GO:0051213//dioxygenase activity;
TraesCS7A02G428300	4.98	3.41	3.79	2.67	3.18	2.78	4.24	5.7	3.52	12.49	13.43	9.85	0.151881	0.0115096	1.5751	5.03118e-245	0.640735	1.50665e-22	2.06395	0	1.25079	6.46243e-237			K10635//E3 ubiquitin-protein ligase Arkadia [EC:2.3.2.27];K10635//E3 ubiquitin-protein ligase Arkadia [EC:2.3.2.27];K10635//E3 ubiquitin-protein ligase Arkadia [EC:2.3.2.27]	EMS64963.1|3.6e-299|E3 ubiquitin ligase BIG BROTHER-related protein [Triticum urartu]
TraesCS2A02G047600	2.83	0.61	0.88	0.74	2.31	0.67	6.82	12.31	2.55	1.83	3.78	0.56	2.33307	3.04354e-263	0.522901	1.52136e-08	2.54241	4.06016e-289	0.732242	2.46009e-14	1.80046	5.22491e-242			K04733//interleukin-1 receptor-associated kinase 4 [EC:2.7.11.1]	AAY34779.1|0.0e+00|wall-associated kinase-like 1 [Triticum aestivum]
TraesCS1B02G276200	1.95	1.88	0.89	2.57	2.99	1.68	2.24	3	3.24	16.66	18.37	45.88	0.855282	5.70238e-08	4.11661	0	0.219473	0.120819	3.48081	0	2.90115	0				XP_020169605.1|3.6e-47|uncharacterized protein LOC109755131 [Aegilops tauschii subsp. tauschii]
TraesCS4D02G201100	5.5	7.71	5.95	9.02	8.74	5.02	27.89	43.45	23.63	5.81	7.2	4.23	2.31277	0	-0.143988	0.0285761	2.0548	0	-0.401964	1.8216e-10	1.42636	0			K00799//glutathione S-transferase [EC:2.5.1.18]+ko00480//Glutathione metabolism;K00799//glutathione S-transferase [EC:2.5.1.18]+ko00480//Glutathione metabolism;K00799//glutathione S-transferase [EC:2.5.1.18]+ko00480//Glutathione metabolism	XP_020176416.1|3.0e-152|protein IN2-1 homolog B [Aegilops tauschii subsp. tauschii]
TraesCS5B02G203000	9.97	7.79	5.59	8.3	9.59	6.61	18.84	20.14	14.47	15.71	12.03	16.95	1.20025	1.40866e-61	0.950434	6.03968e-36	1.11368	1.39896e-54	0.863865	1.03635e-30	1.0378	2.21951e-88				XP_020186350.1|1.4e-34|uncharacterized protein LOC109772069 [Aegilops tauschii subsp. tauschii]
TraesCS7A02G363000	3.07	3.13	1.72	3.18	3.89	3.25	12.09	11.03	10.16	6.03	5.66	6.61	2.0748	2.95555e-227	1.21419	7.64734e-59	1.68527	2.66374e-171	0.824658	9.587e-32	1.50343	9.41667e-225			K08235//xyloglucan:xyloglucosyl transferase [EC:2.4.1.207]	BAJ88307.1|3.2e-173|predicted protein [Hordeum vulgare subsp. vulgare]	GO:0071555//cell wall organization;GO:0044262//cellular carbohydrate metabolic process;GO:0010383//cell wall polysaccharide metabolic process;GO:0044260//cellular macromolecule metabolic process;GO:0010410//hemicellulose metabolic process;GO:0045229//external encapsulating structure organization;GO:0043170//macromolecule metabolic process;GO:0016043//cellular component organization;GO:0044264//ce…
TraesCS1A02G403300	2.56	1.41	0.55	1.06	3.07	0.69	5.32	15.08	6.27	4.19	7.62	1.5	2.56668	2.40535e-120	1.57398	3.29403e-33	2.46013	2.85339e-114	1.46743	5.59843e-30	2.1031	1.02892e-141			K08912//light-harvesting complex II chlorophyll a/b binding protein 1+ko01100//Metabolic pathways+ko00196//Photosynthesis - antenna proteins	XP_020147764.1|9.7e-153|chlorophyll a-b binding protein of LHCII type 1-like [Aegilops tauschii subsp. tauschii]	GO:0006464//cellular protein modification process;GO:0044238//primary metabolic process;GO:0071704//organic substance metabolic process;GO:0044237//cellular metabolic process;GO:0044260//cellular macromolecule metabolic process;GO:0036211//protein modification process;GO:0015979//photosynthesis;GO:0044267//cellular protein metabolic process;GO:0009987//cellular process;GO:0009416//response to lig…
TraesCS3B02G375100	30.19	24.75	17.61	28.78	42.29	37.53	138.97	152.78	83.12	74.58	75.12	74.03	2.37367	0	1.62941	0	1.78642	0	1.04217	0	1.72939	0			K00487//trans-cinnamate 4-monooxygenase [EC:1.14.13.11]+ko00130//Ubiquinone and other terpenoid-quinone biosynthesis+ko01100//Metabolic pathways+ko01110//Biosynthesis of secondary metabolites+ko00940//Phenylpropanoid biosynthesis+ko00941//Flavonoid biosynthesis+ko00945//Stilbenoid, diarylheptanoid and gingerol biosynthesis+ko00360//Phenylalanine metabolism	AHJ61295.1|3.3e-290|cinnamate-4-hydroxylase [Hordeum vulgare]	GO:0006725//cellular aromatic compound metabolic process;GO:0019748//secondary metabolic process;GO:0044237//cellular metabolic process;GO:0009808//lignin metabolic process;GO:0009058//biosynthetic process;GO:0071704//organic substance metabolic process;GO:0009987//cellular process;GO:0044550//secondary metabolite biosynthetic process;GO:1901360//organic cyclic compound metabolic process;GO:00096…
TraesCS3D02G353700	40.27	31.39	33.01	23.67	34	26.68	96.15	124.82	121.53	51.59	45.49	43.24	1.71198	0	0.433777	4.26483e-35	2.01087	0	0.732674	4.77871e-87	1.35484	0			K01803//triosephosphate isomerase (TIM) [EC:5.3.1.1]+ko00010//Glycolysis / Gluconeogenesis+ko01230//Biosynthesis of amino acids+ko01100//Metabolic pathways+ko00051//Fructose and mannose metabolism+ko01110//Biosynthesis of secondary metabolites+ko00710//Carbon fixation in photosynthetic organisms+ko01200//Carbon metabolism+ko00562//Inositol phosphate metabolism;K12486//stromal membrane-associated …	XP_020192346.1|1.5e-88|elicitor-responsive protein 1-like [Aegilops tauschii subsp. tauschii]
TraesCS6A02G281900	13.41	10.42	11.72	9.57	15.07	14.13	35.57	36.8	20.83	27.3	25.12	23.96	1.39514	1.71316e-153	1.1146	3.56394e-89	1.25697	2.18552e-130	0.976433	8.03457e-72	1.19215	2.6811e-217			K05747//Wiskott-Aldrich syndrome protein+ko04144//Endocytosis;K02184//formin 2	OSX75194.1|1.1e-13|hypothetical protein BU14_0249s0013 [Porphyra umbilicalis]	GO:0006725//cellular aromatic compound metabolic process;GO:0044260//cellular macromolecule metabolic process;GO:0006260//DNA replication;GO:0034645//cellular macromolecule biosynthetic process;GO:0006261//DNA-dependent DNA replication;GO:0009987//cellular process;GO:0090304//nucleic acid metabolic process;GO:0006259//DNA metabolic process;GO:1901576//organic substance biosynthetic process;GO:004…
TraesCS2D02G315600	15.48	12.91	11.57	11.14	15.24	12.14	34.03	32.12	21.21	22.75	28.93	19.94	1.13245	2.7834e-153	0.850913	5.76367e-79	1.17563	7.61723e-162	0.894094	2.56096e-85	1.02075	1.07313e-233			K02183//calmodulin+ko04016//MAPK signaling pathway - plant+ko04626//Plant-pathogen interaction+ko04070//Phosphatidylinositol signaling system;K02183//calmodulin+ko04016//MAPK signaling pathway - plant+ko04626//Plant-pathogen interaction+ko04070//Phosphatidylinositol signaling system	XP_020179857.1|6.2e-138|esterase AGAP003155 [Aegilops tauschii subsp. tauschii]
TraesCS2B02G229100	16.31	11.18	11.67	10.16	13.28	11.42	34.33	38.17	19.36	25.4	28.38	23.07	1.32481	0	1.01289	2.95874e-303	1.4621	0	1.15018	0	1.24493	0			K03327//multidrug resistance protein, MATE family;K03327//multidrug resistance protein, MATE family;K03327//multidrug resistance protein, MATE family	PAN44761.1|1.0e-228|hypothetical protein PAHAL_I01519 [Panicum hallii]	GO:0042221//response to chemical;GO:0051179//localization;GO:0042493//response to drug;GO:0055085//transmembrane transport;GO:0051234//establishment of localization;GO:0015893//drug transport;GO:0050896//response to stimulus;GO:0006810//transport;GO:0006855//drug transmembrane transport;GO:0044425//membrane part;GO:0016021//integral component of membrane;GO:0031224//intrinsic component of membran…
TraesCS6D02G237800	2.29	1.8	1	4.08	7.73	4.4	6.17	10.47	5.18	8.68	8.61	7.44	2.10539	2.6088e-142	2.28683	3.579e-177	0.426337	6.71685e-12	0.607769	7.86138e-24	1.13085	2.23626e-122	AP2-EREBP	Malus x domestica AP2 domain class transcription factor (AP2D43) mRNA, complete cds	K09286//EREBP-like factor;K09286//EREBP-like factor	XP_020159886.1|1.4e-147|ethylene-responsive transcription factor ERF027-like [Aegilops tauschii subsp. tauschii]	GO:0009058//biosynthetic process;GO:0044249//cellular biosynthetic process;GO:1901576//organic substance biosynthetic process;GO:0034645//cellular macromolecule biosynthetic process;GO:0016070//RNA metabolic process;GO:0044238//primary metabolic process;GO:0071704//organic substance metabolic process;GO:0009987//cellular process;GO:0034641//cellular nitrogen compound metabolic process;GO:0044260/…
TraesCS1D02G074100	0.82	0.95	0.83	1.07	1.15	1.29	2.38	1.93	1.94	3.3	2.93	4.93	1.91152	7.60069e-178	2.72375	0	1.26823	2.86308e-98	2.08046	0	2.01585	0			K04733//interleukin-1 receptor-associated kinase 4 [EC:2.7.11.1];K04733//interleukin-1 receptor-associated kinase 4 [EC:2.7.11.1];K04733//interleukin-1 receptor-associated kinase 4 [EC:2.7.11.1];K04733//interleukin-1 receptor-associated kinase 4 [EC:2.7.11.1];K04733//interleukin-1 receptor-associated kinase 4 [EC:2.7.11.1]	CDM87084.1|4.1e-172|unnamed protein product [Triticum aestivum]	GO:0007154//cell communication;GO:0065007//biological regulation;GO:0051716//cellular response to stimulus;GO:0050896//response to stimulus;GO:0023052//signaling;GO:0050794//regulation of cellular process;GO:0050789//regulation of biological process;GO:0007166//cell surface receptor signaling pathway;GO:0007165//signal transduction;GO:0009987//cellular process;GO:0044425//membrane part;GO:0031224…
TraesCS4A02G196400	4.49	1.77	2.28	5.16	10.1	5.05	23.45	25.82	9.21	10.32	18.21	6.9	2.78047	0	2.06098	5.02253e-206	1.52403	1.3983e-223	0.804547	9.48855e-50	1.70929	0			K00430//peroxidase [EC:1.11.1.7]+ko01100//Metabolic pathways+ko01110//Biosynthesis of secondary metabolites+ko00940//Phenylpropanoid biosynthesis	XP_020189897.1|1.5e-174|peroxidase 4-like [Aegilops tauschii subsp. tauschii]
TraesCS5B02G356400	10.5	9.96	11.27	12.35	11.83	12.69	18.86	19.93	19.57	47.25	41.17	58.28	0.909946	1.30446e-121	2.23938	0	0.68504	6.63712e-75	2.01447	0	1.60243	0			K18453//ADP-ribose/FAD diphosphatase [EC:3.6.1.13 3.6.1.18]+ko00740//Riboflavin metabolism+ko00230//Purine metabolism+ko01100//Metabolic pathways;K18453//ADP-ribose/FAD diphosphatase [EC:3.6.1.13 3.6.1.18]+ko00740//Riboflavin metabolism+ko00230//Purine metabolism+ko01100//Metabolic pathways;K18453//ADP-ribose/FAD diphosphatase [EC:3.6.1.13 3.6.1.18]+ko00740//Riboflavin metabolism+ko00230//Purine …	XP_015629496.1|6.8e-21|PREDICTED: basic proline-rich protein-like, partial [Oryza sativa Japonica Group]	GO:0003824//catalytic activity;GO:0016787//hydrolase activity;
TraesCS7A02G118300	4.49	1.36	1.33	2.63	5.39	1.49	22.28	28.56	8.57	5.21	12.09	2.14	2.99207	0	1.3668	6.39763e-132	2.64595	0	1.02069	2.85506e-83	2.21919	0			K15333//tRNA guanosine-2'-O-methyltransferase [EC:2.1.1.34];K13199//plasminogen activator inhibitor 1 RNA-binding protein;K12619//5'-3' exoribonuclease 2 [EC:3.1.13.-]+ko03018//RNA degradation+ko03008//Ribosome biogenesis in eukaryotes;K14568//rRNA small subunit pseudouridine methyltransferase Nep1 [EC:2.1.1.260]+ko03008//Ribosome biogenesis in eukaryotes;K15333//tRNA guanosine-2'-O-methyltransfe…	EMS61069.1|0.0e+00|Subtilisin-like protease [Triticum urartu]
TraesCS4B02G128000	1.3	0.69	0.52	1.18	1.69	2.13	4.32	4.36	2.49	2.81	2.22	3.18	2.15691	1.76532e-65	1.71351	4.89947e-36	1.15323	2.05864e-27	0.709828	7.11965e-10	1.36845	5.34496e-60			K22020//mucin-19	XP_020187925.1|6.4e-148|NDR1/HIN1-like protein 13 [Aegilops tauschii subsp. tauschii]
TraesCS7B02G112800	2.43	3.15	2.65	3.36	3.44	3.02	8.34	7.74	7.39	4.1	4.87	7.47	1.51444	1.46559e-110	1.00058	2.64755e-41	1.2519	7.67643e-83	0.738038	3.534e-25	1.14526	1.8961e-121			K21373//7-deoxyloganetic acid glucosyltransferase [EC:2.4.1.323];K13172//serine/arginine repetitive matrix protein 2;K14325//RNA-binding protein with serine-rich domain 1+ko03015//mRNA surveillance pathway+ko03013//RNA transport;K12891//splicing factor, arginine/serine-rich 2+ko03040//Spliceosome	XP_020161421.1|1.3e-156|uncharacterized protein At1g66480-like [Aegilops tauschii subsp. tauschii]
TraesCS1D02G098000	27.66	12.05	9.28	17.79	34.19	13.46	47.52	66.8	21.67	47.72	67.7	20.52	1.47855	0	1.4825	0	1.05311	8.3483e-306	1.05705	1.3661e-306	1.25317	0			K05933//aminocyclopropanecarboxylate oxidase [EC:1.14.17.4]+ko01100//Metabolic pathways+ko01110//Biosynthesis of secondary metabolites+ko00270//Cysteine and methionine metabolism	BAK00849.1|3.9e-178|predicted protein [Hordeum vulgare subsp. vulgare]	GO:0009693//ethylene biosynthetic process;GO:0044249//cellular biosynthetic process;GO:1900673//olefin metabolic process;GO:1901576//organic substance biosynthetic process;GO:1900674//olefin biosynthetic process;GO:0009058//biosynthetic process;GO:0009692//ethylene metabolic process;GO:0009987//cellular process;GO:0042445//hormone metabolic process;GO:0065007//biological regulation;GO:0008152//me…
TraesCS4D02G107400	2.13	2.05	1.45	1.57	2.61	1.01	3.68	7.7	3.36	7.05	7.88	2.74	1.39071	2.13193e-66	1.65747	9.07206e-102	1.49959	8.97459e-74	1.76634	1.37299e-110	1.58256	5.81195e-173			K01623//fructose-bisphosphate aldolase, class I [EC:4.1.2.13]+ko00010//Glycolysis / Gluconeogenesis+ko00030//Pentose phosphate pathway+ko01230//Biosynthesis of amino acids+ko01100//Metabolic pathways+ko00051//Fructose and mannose metabolism+ko01110//Biosynthesis of secondary metabolites+ko00710//Carbon fixation in photosynthetic organisms+ko01200//Carbon metabolism	XP_020183628.1|3.9e-220|fructose-bisphosphate aldolase, chloroplastic [Aegilops tauschii subsp. tauschii]
TraesCS4A02G066800	3.98	3.07	2.12	2.12	2.06	2.7	14.75	19.07	13.59	4.6	5.48	4.97	2.38381	0	0.706178	2.25068e-29	2.81687	0	1.13924	2.43901e-63	1.98032	0			K20456//oxysterol-binding protein 1;K03327//multidrug resistance protein, MATE family;K20456//oxysterol-binding protein 1;K03327//multidrug resistance protein, MATE family;K20456//oxysterol-binding protein 1;K20456//oxysterol-binding protein 1;K20456//oxysterol-binding protein 1	AFZ61901.1|1.2e-303|MATE1A [Triticum aestivum]
TraesCS5D02G491500	1.63	1.24	0.96	1.9	5.68	2.67	6.9	5.26	3.76	3.91	4.33	4.27	2.0606	1.78466e-45	1.71886	1.36474e-28	0.627761	3.51369e-08	0.286018	0.0182612	1.01662	6.03489e-29	C2H2		K13172//serine/arginine repetitive matrix protein 2	XP_020198415.1|2.3e-91|zinc finger protein ZAT6-like [Aegilops tauschii subsp. tauschii]
TraesCS6A02G256600	1.72	1.13	0.78	2.35	5.4	3.38	4.29	6.28	4.02	6.8	5.74	6.42	2.01601	4.7909e-49	2.40052	7.62739e-78	0.381297	0.000227004	0.765805	3.01497e-15	1.18588	9.8051e-52	AP2-EREBP	Malus x domestica AP2 domain class transcription factor (AP2D43) mRNA, complete cds	K09286//EREBP-like factor	XP_020159886.1|2.8e-136|ethylene-responsive transcription factor ERF027-like [Aegilops tauschii subsp. tauschii]	GO:1901576//organic substance biosynthetic process;GO:0044237//cellular metabolic process;GO:0034641//cellular nitrogen compound metabolic process;GO:0071704//organic substance metabolic process;GO:0019438//aromatic compound biosynthetic process;GO:0044238//primary metabolic process;GO:0044260//cellular macromolecule metabolic process;GO:0018130//heterocycle biosynthetic process;GO:0032774//RNA b…
TraesCS5D02G306400	9.71	3.56	3.54	6.4	13.73	7.25	31.68	47.73	19.2	20.36	24.55	12.59	2.55582	0	1.78004	0	1.84801	0	1.07223	1.19713e-276	1.82662	0			K13447//respiratory burst oxidase [EC:1.6.3.- 1.11.1.-]+ko04016//MAPK signaling pathway - plant+ko04626//Plant-pathogen interaction	BAJ94299.1|0.0e+00|predicted protein [Hordeum vulgare subsp. vulgare]	GO:0016020//membrane;GO:0031224//intrinsic component of membrane;GO:0016021//integral component of membrane;GO:0044425//membrane part;GO:0043167//ion binding;GO:0046872//metal ion binding;GO:0005509//calcium ion binding;GO:0016491//oxidoreductase activity;GO:0016209//antioxidant activity;GO:0003824//catalytic activity;GO:0043169//cation binding;GO:0050664//oxidoreductase activity, acting on NAD(P…
TraesCS7D02G538700	6.73	2.09	1.91	3.47	15.95	9.53	56.67	42.46	16.22	2.98	4.11	1.19	3.4323	0	-0.364357	2.05747e-06	1.99558	0	-1.80108	3.92735e-198	1.65333	0			K00485//dimethylaniline monooxygenase (N-oxide forming) [EC:1.14.13.8]	EMT06190.1|9.8e-286|Putative flavin-containing monooxygenase 1 [Aegilops tauschii]
TraesCS5D02G010200	2.46	1.64	2.46	2.21	3.36	1.79	6.76	10.09	2.77	5.31	12.43	1.3	1.58476	2.98634e-85	1.54784	6.49255e-80	1.4125	7.53753e-72	1.37558	5.51264e-67	1.47824	1.19228e-149			K01601//ribulose-bisphosphate carboxylase large chain [EC:4.1.1.39]+ko01100//Metabolic pathways+ko00710//Carbon fixation in photosynthetic organisms+ko01200//Carbon metabolism+ko00630//Glyoxylate and dicarboxylate metabolism	CAA90001.1|3.6e-248|ribulosebiphosphate carboxylase (chloroplast) [Leymus erianthus]
TraesCS2B02G294300	2.24	0.78	0.98	0.95	2.75	1.69	6.64	10.01	5.25	5.09	3.25	4.69	2.47868	1.02754e-16	1.77315	1.61621e-07	1.97951	5.53846e-13	1.27397	4.23726e-05	1.90092	4.66791e-19				KQJ82131.1|6.6e-23|hypothetical protein BRADI_5g06485 [Brachypodium distachyon]
TraesCS3B02G549000	16.64	2.62	2.4	5.63	17.69	4.13	30.28	49.09	8.62	8.51	30.26	1.77	2.02696	0	0.914185	1.05695e-120	1.68521	0	0.57244	4.50075e-54	1.39849	0			K10529//alpha-dioxygenase [EC:1.-.-.-]+ko00592//alpha-Linolenic acid metabolism;K10529//alpha-dioxygenase [EC:1.-.-.-]+ko00592//alpha-Linolenic acid metabolism	XP_020172444.1|0.0e+00|alpha-dioxygenase 1 [Aegilops tauschii subsp. tauschii]	GO:0009725//response to hormone;GO:0071241//cellular response to inorganic substance;GO:0044238//primary metabolic process;GO:1901701//cellular response to oxygen-containing compound;GO:0006629//lipid metabolic process;GO:0016042//lipid catabolic process;GO:0008152//metabolic process;GO:0097305//response to alcohol;GO:1901615//organic hydroxy compound metabolic process;GO:0051704//multi-organism …
TraesCS4A02G432900	0.07	0.09	0.06	1.2	2.73	3.54	5.71	4.33	4.44	4.4	4.38	4.15	6.08177	1.85093e-250	5.92279	1.23363e-223	0.953288	8.13464e-38	0.794313	2.8402e-25	1.84233	6.72614e-189			K21374//7-deoxyloganetin glucosyltransferase [EC:2.4.1.324]	EMS53235.1|1.9e-273|UDP-glycosyltransferase 85A2 [Triticum urartu]
TraesCS7D02G355600	5.05	0.66	1.17	1.54	4.08	0.75	5.13	15.4	3.26	2.23	6.07	0.67	1.79218	1.32509e-301	0.390701	2.48785e-10	1.89947	0	0.497991	2.84103e-15	1.31182	1.08079e-262		Leucine-rich repeat protein kinase family protein (best arabidopsis hit)	K20181//vacuolar protein sorting-associated protein 18;K13437//receptor kinase-like protein+ko04626//Plant-pathogen interaction;K13428//LRR receptor-like serine/threonine-protein kinase EFR [EC:2.7.11.1]+ko04626//Plant-pathogen interaction	XP_020158117.1|0.0e+00|probable LRR receptor-like serine/threonine-protein kinase At3g47570 [Aegilops tauschii subsp. tauschii]
TraesCS2D02G377400	34.26	20.86	17.55	27.88	44.9	38.61	145.03	190.11	83.34	69.29	79.71	64.57	2.5365	0	1.55614	0	1.91222	0	0.931854	0	1.78684	0			K10775//phenylalanine ammonia-lyase [EC:4.3.1.24]+ko01100//Metabolic pathways+ko01110//Biosynthesis of secondary metabolites+ko00940//Phenylpropanoid biosynthesis+ko00360//Phenylalanine metabolism;K10775//phenylalanine ammonia-lyase [EC:4.3.1.24]+ko01100//Metabolic pathways+ko01110//Biosynthesis of secondary metabolites+ko00940//Phenylpropanoid biosynthesis+ko00360//Phenylalanine metabolism;K1077…	XP_003580144.1|0.0e+00|PREDICTED: phenylalanine ammonia-lyase [Brachypodium distachyon]	GO:0072330//monocarboxylic acid biosynthetic process;GO:0044238//primary metabolic process;GO:1901576//organic substance biosynthetic process;GO:0009074//aromatic amino acid family catabolic process;GO:0042737//drug catabolic process;GO:0009699//phenylpropanoid biosynthetic process;GO:0009987//cellular process;GO:0043436//oxoacid metabolic process;GO:0044281//small molecule metabolic process;GO:0…
BGI_novel_G006350	0	0	0	2.55	1.54	2.64	2.7	2.2	2.52	3.51	2.73	3.38	12.0426	2.63833e-245	12.4175	1.0046e-294	0.14032	0.00222586	0.515244	6.79324e-33	1.34564	1.85244e-284
TraesCS1A02G095600	1.35	2.4	1.1	1.38	1.56	1.59	4.07	3.96	6.81	4.08	3.17	5.91	1.61645	2.30206e-73	1.44722	1.43634e-55	1.7036	1.50576e-78	1.53437	3.7068e-60	1.57756	1.48634e-131			K17500//integrin-linked kinase-associated serine/threonine phosphatase 2C [EC:3.1.3.16];K13412//calcium-dependent protein kinase [EC:2.7.11.1]+ko04626//Plant-pathogen interaction	XP_020197686.1|8.6e-211|WAT1-related protein At5g64700-like [Aegilops tauschii subsp. tauschii]
TraesCS4A02G290800	3.98	2.86	2.88	2.65	3.05	3.05	17.03	20.08	9.36	10.31	7.21	8.49	2.26383	5.42044e-146	1.43335	6.36784e-45	2.39954	1.33851e-155	1.56907	7.24028e-51	1.97603	1.1732e-190			K05747//Wiskott-Aldrich syndrome protein+ko04144//Endocytosis;K22020//mucin-19	XP_020194813.1|9.8e-50|VQ motif-containing protein 29-like [Aegilops tauschii subsp. tauschii]
TraesCS2B02G398200	37.29	22.91	20.11	28.09	47.69	41.36	124.9	174.72	80.36	65.53	76.18	61.93	2.24567	0	1.34626	0	1.69794	0	0.798526	0	1.56929	0			K10775//phenylalanine ammonia-lyase [EC:4.3.1.24]+ko01100//Metabolic pathways+ko01110//Biosynthesis of secondary metabolites+ko00940//Phenylpropanoid biosynthesis+ko00360//Phenylalanine metabolism	XP_003580144.1|0.0e+00|PREDICTED: phenylalanine ammonia-lyase [Brachypodium distachyon]	GO:1901576//organic substance biosynthetic process;GO:1901565//organonitrogen compound catabolic process;GO:0009063//cellular amino acid catabolic process;GO:0016053//organic acid biosynthetic process;GO:0044237//cellular metabolic process;GO:1901362//organic cyclic compound biosynthetic process;GO:1901361//organic cyclic compound catabolic process;GO:0046394//carboxylic acid biosynthetic process…
TraesCS5A02G262000	11.38	7.66	6.17	6.83	9.78	7.78	20.9	22.43	16.17	13.96	12.54	14.99	1.24173	1.08357e-204	0.723269	4.76778e-59	1.28348	2.0652e-214	0.765019	1.27655e-64	1.02791	7.33012e-255			K13412//calcium-dependent protein kinase [EC:2.7.11.1]+ko04626//Plant-pathogen interaction;K02184//formin 2	BAJ98861.1|1.1e-139|predicted protein [Hordeum vulgare subsp. vulgare]	GO:0016020//membrane;GO:0031224//intrinsic component of membrane;GO:0016021//integral component of membrane;GO:0044425//membrane part;
TraesCS3D02G193000	6.52	6.31	5.6	6.69	6.37	5.58	10.8	10.58	8.08	15.62	8.62	23.44	0.681141	4.28221e-14	1.3827	9.64111e-67	0.648036	5.63379e-13	1.3496	4.39452e-64	1.05541	3.48451e-70			K05747//Wiskott-Aldrich syndrome protein+ko04144//Endocytosis	XP_020187582.1|1.5e-54|uncharacterized protein LOC109773295 [Aegilops tauschii subsp. tauschii]
TraesCS5D02G073400	29.43	11.47	11.99	6.42	25.16	13.6	64.64	80.31	43.09	23.62	35.21	12.52	1.83442	0	0.442699	2.01494e-27	2.05291	0	0.661186	1.2839e-54	1.40892	0			K09753//cinnamoyl-CoA reductase [EC:1.2.1.44]+ko01100//Metabolic pathways+ko01110//Biosynthesis of secondary metabolites+ko00940//Phenylpropanoid biosynthesis	XP_020194901.1|5.3e-196|cinnamoyl-CoA reductase 1-like [Aegilops tauschii subsp. tauschii]	GO:0048037//cofactor binding;GO:0005488//binding;GO:0003824//catalytic activity;GO:0050662//coenzyme binding;
TraesCS3A02G191700	1.53	1.45	1.23	1.79	2.74	1.54	4.58	11.83	3.04	4.18	4.19	2.45	2.23286	1.11449e-143	1.3981	3.11838e-43	1.67762	1.78338e-98	0.842863	6.97853e-20	1.57474	1.2184e-139			K04035//magnesium-protoporphyrin IX monomethyl ester (oxidative) cyclase [EC:1.14.13.81]+ko00860//Porphyrin and chlorophyll metabolism+ko01100//Metabolic pathways+ko01110//Biosynthesis of secondary metabolites;K04035//magnesium-protoporphyrin IX monomethyl ester (oxidative) cyclase [EC:1.14.13.81]+ko00860//Porphyrin and chlorophyll metabolism+ko01100//Metabolic pathways+ko01110//Biosynthesis of s…	AAW66004.1|2.4e-169|leucine zipper protein zip1 [Triticum aestivum]	GO:0044271//cellular nitrogen compound biosynthetic process;GO:0046148//pigment biosynthetic process;GO:0051188//cofactor biosynthetic process;GO:0046483//heterocycle metabolic process;GO:0006725//cellular aromatic compound metabolic process;GO:0009987//cellular process;GO:0071704//organic substance metabolic process;GO:0009058//biosynthetic process;GO:0008152//metabolic process;GO:0051186//cofac…
TraesCS2A02G145800	14.32	8.92	7.24	13.61	26.03	20.28	67.51	77.33	36.76	34.12	37.22	30.47	2.57935	0	1.74453	0	1.60015	0	0.765335	8.67349e-279	1.65519	0			K01904//4-coumarate--CoA ligase [EC:6.2.1.12]+ko00130//Ubiquinone and other terpenoid-quinone biosynthesis+ko01100//Metabolic pathways+ko01110//Biosynthesis of secondary metabolites+ko00940//Phenylpropanoid biosynthesis+ko00360//Phenylalanine metabolism	BAJ85762.1|2.0e-298|predicted protein [Hordeum vulgare subsp. vulgare]	GO:0008152//metabolic process;GO:0003824//catalytic activity;
TraesCS5D02G413200	23.98	11.36	9.92	9.64	20.16	13.62	34.98	40.57	27.59	31.82	36.77	24.66	1.19113	0	1.04975	4.93622e-236	1.24521	0	1.10383	9.9599e-255	1.14928	0			K01723//hydroperoxide dehydratase [EC:4.2.1.92]+ko00592//alpha-Linolenic acid metabolism+ko01100//Metabolic pathways+ko01110//Biosynthesis of secondary metabolites	XP_003558850.1|1.2e-263|PREDICTED: allene oxide synthase 1, chloroplastic [Brachypodium distachyon]	GO:0010817//regulation of hormone levels;GO:0031408//oxylipin biosynthetic process;GO:0006633//fatty acid biosynthetic process;GO:0098542//defense response to other organism;GO:0071704//organic substance metabolic process;GO:0043207//response to external biotic stimulus;GO:0044281//small molecule metabolic process;GO:0019752//carboxylic acid metabolic process;GO:0031407//oxylipin metabolic proces…
TraesCS2A02G152000	60.31	61.87	57.43	30.83	34.25	33.4	129.2	174.64	85.81	87.83	82.83	76.09	1.12241	0	0.471341	1.71865e-56	1.97338	0	1.32231	0	1.19698	0				OWM72375.1|1.6e-22|hypothetical protein CDL15_Pgr018260 [Punica granatum]	GO:0016020//membrane;GO:0031224//intrinsic component of membrane;GO:0044425//membrane part;GO:0016021//integral component of membrane;
TraesCS3A02G318100	1.25	0.92	0.76	1.77	4.38	2.96	5.22	2.75	10.14	2.15	2.56	1.37	2.62371	5.81099e-106	1.06258	1.64238e-11	0.979685	2.5228e-27	-0.581445	1.01798e-06	1.00827	8.95029e-38			K20628//expansin	AAS48873.1|5.4e-145|expansin EXPA4 [Triticum aestivum]
TraesCS7A02G112900	1.51	4.01	2.31	1.46	2.96	1.55	5.39	6.02	7.84	6.74	4.46	6.44	1.29871	9.13931e-12	1.19878	6.94218e-10	1.66152	3.00162e-16	1.56159	5.22352e-14	1.4191	4.52316e-24				XP_020190081.1|8.0e-36|uncharacterized protein LOC109775795 [Aegilops tauschii subsp. tauschii]
TraesCS2A02G381000	21.55	14.17	10.98	17.22	28.65	25.1	95.91	134.07	52.87	45.71	52.54	46.35	2.60313	0	1.63474	0	1.99554	0	1.02716	0	1.86754	0			K10775//phenylalanine ammonia-lyase [EC:4.3.1.24]+ko01100//Metabolic pathways+ko01110//Biosynthesis of secondary metabolites+ko00940//Phenylpropanoid biosynthesis+ko00360//Phenylalanine metabolism	XP_003580144.1|0.0e+00|PREDICTED: phenylalanine ammonia-lyase [Brachypodium distachyon]	GO:1901362//organic cyclic compound biosynthetic process;GO:1901361//organic cyclic compound catabolic process;GO:1901575//organic substance catabolic process;GO:0044283//small molecule biosynthetic process;GO:0009803//cinnamic acid metabolic process;GO:0017144//drug metabolic process;GO:0006520//cellular amino acid metabolic process;GO:1901606//alpha-amino acid catabolic process;GO:0009063//cell…
TraesCS5A02G389100	1.53	1.2	0.78	2.11	2.43	1.89	7.21	13.42	5.56	6.91	8.67	6.33	2.90571	0	2.64924	0	2.02396	1.096e-275	1.76749	8.23316e-192	2.2788	0			K05349//beta-glucosidase [EC:3.2.1.21]+ko01100//Metabolic pathways+ko00500//Starch and sucrose metabolism+ko01110//Biosynthesis of secondary metabolites+ko00460//Cyanoamino acid metabolism+ko00940//Phenylpropanoid biosynthesis	XP_015632247.1|1.5e-302|PREDICTED: beta-glucosidase BoGH3B isoform X1 [Oryza sativa Japonica Group]	GO:0009251//glucan catabolic process;GO:0005975//carbohydrate metabolic process;GO:0005976//polysaccharide metabolic process;GO:0016052//carbohydrate catabolic process;GO:1901575//organic substance catabolic process;GO:0000272//polysaccharide catabolic process;GO:0009056//catabolic process;GO:0044042//glucan metabolic process;GO:0044238//primary metabolic process;GO:0009057//macromolecule catabol…
TraesCS3B02G138900	37.87	27.36	24.41	22.74	34.76	26.1	91.28	101.28	79.74	37.42	40.46	37.83	1.60497	0	0.3729	2.5477e-58	1.70025	0	0.46818	1.49175e-87	1.16695	0			K20240//spermidine dicoumaroyl transferase [EC:2.3.1.249];K19861//benzyl alcohol O-benzoyltransferase [EC:2.3.1.196 2.3.1.232];K15400//omega-hydroxypalmitate O-feruloyl transferase [EC:2.3.1.188]+ko00073//Cutin, suberine and wax biosynthesis	CAO77317.1|9.4e-252|putative acyl transferase 6 [Triticum aestivum]
TraesCS2D02G157800	14.35	10.75	9.3	18.1	31.4	23.45	95.01	116.24	52.8	52.13	54.67	37.92	2.94468	0	2.07897	0	1.85474	0	0.989026	0	1.93541	0			K20660//cytochrome P450 family 709	XP_020184145.1|3.8e-301|cytochrome P450 709B1-like [Aegilops tauschii subsp. tauschii]
TraesCS6A02G077000	3	2.9	2.5	2.35	3.57	2.2	5.1	4.05	4.73	8	8.62	7.88	0.726216	2.9343e-18	1.55062	1.43543e-101	0.767734	7.23026e-20	1.59214	5.63209e-105	1.21449	2.83829e-109			K01183//chitinase [EC:3.2.1.14]+ko00520//Amino sugar and nucleotide sugar metabolism+ko01100//Metabolic pathways	BAD99103.1|1.7e-181|xylanase inhibitor XIP-III [Triticum aestivum]
TraesCS2B02G443500	0.75	0.67	0.51	1.44	1.59	1.78	3.01	2.66	2.07	2.81	2.33	2.93	1.99764	4.79511e-75	2.05914	8.43555e-81	0.679827	5.31177e-15	0.74132	8.62339e-18	1.22704	3.79872e-75			K13412//calcium-dependent protein kinase [EC:2.7.11.1]+ko04626//Plant-pathogen interaction	XP_020180232.1|7.6e-269|polygalacturonase QRT3-like [Aegilops tauschii subsp. tauschii]
TraesCS7D02G048000	3.12	2.41	1.59	1.9	2.08	2.88	11.55	11.67	8.54	11.2	9.18	8.41	2.15921	1.13536e-295	2.01972	2.48104e-245	2.20944	9.82457e-303	2.06995	5.84847e-252	2.11637	0			K13412//calcium-dependent protein kinase [EC:2.7.11.1]+ko04626//Plant-pathogen interaction;K21952//CASK-interacting protein	XP_020180518.1|2.6e-300|aspartyl protease family protein At5g10770-like [Aegilops tauschii subsp. tauschii]	GO:0044238//primary metabolic process;GO:0019538//protein metabolic process;GO:0009056//catabolic process;GO:0009057//macromolecule catabolic process;GO:0043170//macromolecule metabolic process;GO:1901565//organonitrogen compound catabolic process;GO:0071704//organic substance metabolic process;GO:0008152//metabolic process;GO:0030163//protein catabolic process;GO:0006807//nitrogen compound metab…
TraesCS1A02G107700	1.82	0.81	1.35	0.85	1.16	0.97	4.69	6.29	3.57	2.45	1.58	2.08	1.87383	6.85997e-64	0.62468	6.28402e-06	2.28321	2.17794e-81	1.03405	3.71385e-12	1.57339	1.31063e-70			K12133//MYB-related transcription factor LHY+ko04712//Circadian rhythm - plant	EMS66156.1|1.9e-114|Transcription factor ASG4 [Triticum urartu]	GO:0016070//RNA metabolic process;GO:0071704//organic substance metabolic process;GO:0051252//regulation of RNA metabolic process;GO:0034654//nucleobase-containing compound biosynthetic process;GO:0006807//nitrogen compound metabolic process;GO:0034641//cellular nitrogen compound metabolic process;GO:0080090//regulation of primary metabolic process;GO:0060255//regulation of macromolecule metaboli…
TraesCS5B02G069500	63.5	31.67	37.21	16.27	43.9	28.73	117.85	141.51	96.34	66.46	74.09	49.5	1.42826	0	0.528732	8.53327e-123	1.99642	0	1.09689	0	1.30521	0			K09753//cinnamoyl-CoA reductase [EC:1.2.1.44]+ko01100//Metabolic pathways+ko01110//Biosynthesis of secondary metabolites+ko00940//Phenylpropanoid biosynthesis	XP_020194901.1|1.7e-186|cinnamoyl-CoA reductase 1-like [Aegilops tauschii subsp. tauschii]	GO:0050662//coenzyme binding;GO:0005488//binding;GO:0003824//catalytic activity;GO:0048037//cofactor binding;
TraesCS7B02G208100	6.63	3.49	3.91	1.81	4.8	2.3	15.3	21.47	15.08	6.26	10.55	3.66	1.88873	2.17143e-191	0.556084	6.18859e-12	2.53477	2.52897e-273	1.20213	4.14102e-40	1.66068	9.73857e-223			K03006//DNA-directed RNA polymerase II subunit RPB1 [EC:2.7.7.6]+ko03020//RNA polymerase	XP_020162101.1|2.0e-88|stellacyanin-like [Aegilops tauschii subsp. tauschii]
TraesCS3B02G120600	0	0	0	9.75	12.32	11.67	16.48	19.55	13.15	13.89	16.35	13.63	13.1523	0	12.99	0	0.538632	2.74561e-58	0.376365	1.14578e-27	1.46718	0		Oryza sativa Japonica Group cultivar Taipei 309 E3 ligase (BBI1) gene, complete cds.	K19041//E3 ubiquitin-protein ligase RNF38/44 [EC:2.3.2.27];K19041//E3 ubiquitin-protein ligase RNF38/44 [EC:2.3.2.27];K19041//E3 ubiquitin-protein ligase RNF38/44 [EC:2.3.2.27]	XP_020175553.1|6.6e-286|probable E3 ubiquitin-protein ligase HIP1 [Aegilops tauschii subsp. tauschii]
TraesCS3D02G545700	23.27	12.05	12.24	7.03	18.54	15.38	82.1	75.15	39.96	6.35	6.67	2.15	2.05671	0	-1.65281	1.5672e-180	2.26511	0	-1.44441	3.0504e-128	1.27073	0			K08726//soluble epoxide hydrolase / lipid-phosphate phosphatase [EC:3.3.2.10 3.1.3.76]+ko04146//Peroxisome+ko00590//Arachidonic acid metabolism+ko01100//Metabolic pathways;K01079//phosphoserine phosphatase [EC:3.1.3.3]+ko01230//Biosynthesis of amino acids+ko01100//Metabolic pathways+ko00260//Glycine, serine and threonine metabolism+ko01200//Carbon metabolism;K08726//soluble epoxide hydrolase / li…	EMT20019.1|1.2e-154|hypothetical protein F775_43824 [Aegilops tauschii]
TraesCS7A02G069300	13.65	7.45	5.68	11.38	20.04	12.75	56.98	72.11	42.31	25.82	26.38	20.01	2.68116	0	1.43618	0	1.95431	0	0.709333	6.48169e-134	1.78567	0			K01583//arginine decarboxylase [EC:4.1.1.19]+ko00330//Arginine and proline metabolism+ko01100//Metabolic pathways	ABX80379.1|0.0e+00|arginine decarboxylase [Triticum aestivum]	GO:0046395//carboxylic acid catabolic process;GO:1901565//organonitrogen compound catabolic process;GO:0044281//small molecule metabolic process;GO:0044282//small molecule catabolic process;GO:0044106//cellular amine metabolic process;GO:0006527//arginine catabolic process;GO:0009063//cellular amino acid catabolic process;GO:1901576//organic substance biosynthetic process;GO:0006520//cellular ami…
TraesCS7B02G177500	3.32	1.37	1.64	0.15	0.27	0.75	5.64	6.99	4.98	4.77	6.12	4.36	1.48016	2.85971e-242	1.27087	9.78708e-166	3.91904	0	3.70974	0	2.13105	0			K14972//PAX-interacting protein 1;K14972//PAX-interacting protein 1;K14972//PAX-interacting protein 1;K14972//PAX-interacting protein 1	XP_020179226.1|0.0e+00|mediator of RNA polymerase II transcription subunit 15a-like [Aegilops tauschii subsp. tauschii]
TraesCS2D02G348900	1.22	0.61	0.57	1.88	4.05	1.15	5.85	3.28	3.55	4.77	8.7	3.5	2.40412	1.73668e-72	2.83137	1.02134e-114	0.834274	2.78364e-16	1.26152	2.95176e-40	1.6469	3.19657e-102			K01183//chitinase [EC:3.2.1.14]+ko00520//Amino sugar and nucleotide sugar metabolism+ko01100//Metabolic pathways	XP_020186272.1|1.9e-164|chitinase 5-like [Aegilops tauschii subsp. tauschii]	GO:0005975//carbohydrate metabolic process;GO:0044036//cell wall macromolecule metabolic process;GO:0044260//cellular macromolecule metabolic process;GO:0006032//chitin catabolic process;GO:1901565//organonitrogen compound catabolic process;GO:0006026//aminoglycan catabolic process;GO:0042737//drug catabolic process;GO:0017144//drug metabolic process;GO:0071554//cell wall organization or biogenes…
TraesCS1A02G268400	4.53	9.31	2.62	16.24	27.03	17.62	33.48	47.45	29.37	33.41	31.86	32.68	2.75005	0	2.58374	0	0.850454	1.05189e-113	0.684149	8.9015e-70	1.43162	0			K21568//pinoresinol/lariciresinol reductase [EC:1.23.1.1 1.23.1.2 1.23.1.3 1.23.1.4]+ko00999//Biosynthesis of secondary metabolites - unclassified+ko01110//Biosynthesis of secondary metabolites	XP_020157388.1|9.0e-163|isoflavone reductase homolog IRL-like [Aegilops tauschii subsp. tauschii]
TraesCS5D02G301200	4.04	3.51	2.58	2.36	3.17	3.24	10.21	10.63	9.09	8.71	6.58	12.45	1.56712	5.25542e-76	1.46158	1.18918e-63	1.7635	3.78153e-89	1.65796	8.79046e-76	1.61003	9.09572e-150				XP_020166535.1|6.5e-99|uncharacterized protein LOC109752076 [Aegilops tauschii subsp. tauschii]
TraesCS3A02G252900	3.79	3.58	2.27	5.12	6.47	4.23	13.92	17.91	11.68	7.57	6.32	7.33	2.1764	0	1.14154	1.32872e-79	1.45697	1.48281e-234	0.422117	2.92137e-15	1.35055	0	bHLH		K13422//transcription factor MYC2+ko04016//MAPK signaling pathway - plant+ko04075//Plant hormone signal transduction	XP_020183019.1|2.5e-247|transcription factor bHLH13-like [Aegilops tauschii subsp. tauschii]
TraesCS5A02G543600	0	0	0	6.54	17.48	4.55	22.03	42.02	8.69	9.19	14.68	1.89	12.3991	8.20042e-294	10.9083	6.30014e-136	1.34454	1.53556e-159	-0.1463	0.0241555	1.79491	0		Leucine-rich repeat protein kinase family protein (best arabidopsis hit)	K00384//thioredoxin reductase (NADPH) [EC:1.8.1.9]+ko00450//Selenocompound metabolism	XP_020190032.1|1.7e-116|germin-like protein 8-5 [Aegilops tauschii subsp. tauschii]
TraesCS3B02G456100	7.36	7.1	7.81	0.11	0.36	2.32	0.09	0	0.29	23.97	18.63	25.55	-5.87405	7.41514e-101	1.62748	1.60705e-103	-2.89877	3.66531e-10	4.60276	4.31559e-290	1.44836	1.55056e-87			K02923//large subunit ribosomal protein L38e+ko03010//Ribosome	XP_020198895.1|9.3e-32|60S ribosomal protein L38-like [Aegilops tauschii subsp. tauschii]	GO:0043043//peptide biosynthetic process;GO:0043604//amide biosynthetic process;GO:0009059//macromolecule biosynthetic process;GO:0016043//cellular component organization;GO:0043603//cellular amide metabolic process;GO:0044260//cellular macromolecule metabolic process;GO:0022613//ribonucleoprotein complex biogenesis;GO:0022618//ribonucleoprotein complex assembly;GO:0008152//metabolic process;GO:0…
TraesCS5B02G166000	3.54	3.18	2.53	3.43	4.37	4.14	10.96	11.3	9.82	5.55	5.87	5.29	1.79738	1.21454e-87	0.863334	6.34541e-16	1.41757	1.95111e-62	0.483526	1.41399e-06	1.20605	7.88438e-74		NB-ARC domain-containing disease resistance protein (best arabidopsis hit)	K12486//stromal membrane-associated protein+ko04144//Endocytosis	XP_020188213.1|6.5e-90|protein C2-DOMAIN ABA-RELATED 11 [Aegilops tauschii subsp. tauschii]	GO:0005737//cytoplasm;GO:0044444//cytoplasmic part;GO:0005886//plasma membrane;GO:0016020//membrane;GO:0005623//cell;GO:0043231//intracellular membrane-bounded organelle;GO:0044424//intracellular part;GO:0043226//organelle;GO:0005773//vacuole;GO:0005622//intracellular;GO:0043229//intracellular organelle;GO:0044464//cell part;GO:0043227//membrane-bounded organelle;GO:0071944//cell periphery;
TraesCS1A02G012600	3.43	3.75	1.06	1.69	5.19	1.71	29.88	38.35	40.09	43.28	50.89	31.05	3.72042	0	3.93799	0	3.64695	0	3.86452	0	3.79559	0			K13420//LRR receptor-like serine/threonine-protein kinase FLS2 [EC:2.7.11.1]+ko04016//MAPK signaling pathway - plant+ko04626//Plant-pathogen interaction	KQK08129.1|6.1e-144|hypothetical protein BRADI_2g39830 [Brachypodium distachyon]
TraesCS1A02G361900	20.25	25.83	20.57	21.49	22.66	32.54	44.84	31.89	85.09	52.41	36.75	56.22	1.2779	3.27812e-252	1.13487	1.18257e-188	1.06283	1.32652e-187	0.919802	1.79238e-133	1.09758	0			K11253//histone H3	BAS75384.1|1.2e-69|Os01g0866200, partial [Oryza sativa Japonica Group]	GO:0032991//macromolecular complex;GO:0043231//intracellular membrane-bounded organelle;GO:0044422//organelle part;GO:0043227//membrane-bounded organelle;GO:0000786//nucleosome;GO:0005623//cell;GO:0044446//intracellular organelle part;GO:0043232//intracellular non-membrane-bounded organelle;GO:0044464//cell part;GO:0005694//chromosome;GO:0044815//DNA packaging complex;GO:0044427//chromosomal part…
TraesCS2B02G609400	1.95	1.73	1.62	0.51	1.27	0.41	23.2	24.73	20.15	0.16	0.35	0.13	3.68536	0	-3.0465	7.37255e-30	4.95447	0	-1.7774	1.14551e-07	3.20424	0			K00799//glutathione S-transferase [EC:2.5.1.18]+ko00480//Glutathione metabolism	XP_020180284.1|3.0e-125|glutathione S-transferase 3-like [Aegilops tauschii subsp. tauschii]
TraesCS3B02G003900	1.46	1.73	1.3	1.56	1.3	3.22	5.8	7.33	2.46	3.81	4.41	3.33	1.7739	2.98801e-42	1.34859	8.82387e-22	1.3545	6.53814e-29	0.929186	1.35704e-12	1.3543	3.66297e-49			K21568//pinoresinol/lariciresinol reductase [EC:1.23.1.1 1.23.1.2 1.23.1.3 1.23.1.4]+ko00999//Biosynthesis of secondary metabolites - unclassified+ko01110//Biosynthesis of secondary metabolites;K21568//pinoresinol/lariciresinol reductase [EC:1.23.1.1 1.23.1.2 1.23.1.3 1.23.1.4]+ko00999//Biosynthesis of secondary metabolites - unclassified+ko01110//Biosynthesis of secondary metabolites	CDM80004.1|2.5e-106|unnamed protein product [Triticum aestivum]
TraesCS5A02G210300	1.86	1.73	1.29	1.47	1.89	2.08	5.04	5.08	3.71	3.55	2.82	4.69	1.4828	6.60633e-71	1.28496	5.81357e-50	1.23817	5.27575e-54	1.04033	5.56642e-36	1.26098	2.87267e-102			K04733//interleukin-1 receptor-associated kinase 4 [EC:2.7.11.1];K04733//interleukin-1 receptor-associated kinase 4 [EC:2.7.11.1];K04733//interleukin-1 receptor-associated kinase 4 [EC:2.7.11.1]	XP_020164965.1|2.4e-251|serine/threonine-protein kinase RIPK-like [Aegilops tauschii subsp. tauschii]
TraesCS1B02G198700	3.99	3.76	2.66	4.33	6.65	4.87	10.01	11.25	6.89	8.94	8.61	7.96	1.43817	1.52239e-169	1.29696	5.98928e-131	0.82643	5.00098e-70	0.685222	3.45676e-46	1.03312	1.04221e-190			K08900//mitochondrial chaperone BCS1	XP_020192168.1|8.4e-284|AAA-ATPase At2g46620 [Aegilops tauschii subsp. tauschii]	GO:0044425//membrane part;GO:0016020//membrane;GO:0031224//intrinsic component of membrane;GO:0016021//integral component of membrane;GO:0097159//organic cyclic compound binding;GO:0005524//ATP binding;GO:0017076//purine nucleotide binding;GO:0097367//carbohydrate derivative binding;GO:0032553//ribonucleotide binding;GO:0032559//adenyl ribonucleotide binding;GO:1901265//nucleoside phosphate bindi…
TraesCS3A02G227800	4.71	5.74	4.52	4.29	4.52	7.3	19.09	17.74	13.71	13.98	10.62	22.32	1.70441	0	1.65143	0	1.59415	0	1.54116	0	1.62241	0			K07428//cytochrome P450 family 4 subfamily X [EC:1.14.14.1];K07426//cytochrome P450 family 4 subfamily B polypeptide 1 [EC:1.14.14.1];K07428//cytochrome P450 family 4 subfamily X [EC:1.14.14.1];K07426//cytochrome P450 family 4 subfamily B polypeptide 1 [EC:1.14.14.1];K07428//cytochrome P450 family 4 subfamily X [EC:1.14.14.1];K07426//cytochrome P450 family 4 subfamily B polypeptide 1 [EC:1.14.14.…	XP_020150752.1|3.0e-262|cytochrome P450 72A11-like [Aegilops tauschii subsp. tauschii]	GO:0043169//cation binding;GO:0004497//monooxygenase activity;GO:1901363//heterocyclic compound binding;GO:0016491//oxidoreductase activity;GO:0046872//metal ion binding;GO:0016705//oxidoreductase activity, acting on paired donors, with incorporation or reduction of molecular oxygen;GO:0005506//iron ion binding;GO:0020037//heme binding;GO:0097159//organic cyclic compound binding;GO:0005488//bindi…
TraesCS4B02G332800	7.04	2.37	2.41	11.32	13.94	7.82	14.01	26.31	7.48	17.53	24.09	8.64	2.02167	1.89511e-159	2.1005	1.38596e-175	0.525278	1.58963e-19	0.604112	8.19934e-26	1.13057	4.24378e-139				BAF79926.1|1.5e-92|group3 late embryogenesis abundant protein [Triticum aestivum]
TraesCS5A02G552000	2.5	2.1	1.46	4.25	7.27	2.38	16.57	32.42	16.26	12.84	21.04	4.56	3.43366	0	2.67872	2.11233e-230	2.22542	0	1.47049	3.94506e-106	2.38301	0			K05953//nicotianamine synthase [EC:2.5.1.43]	AND77093.1|1.2e-179|nicotianamine synthase [Triticum aestivum]
TraesCS4B02G237600	9.79	5.56	3.32	1.13	1.63	0.58	9.64	9.84	5.73	17.59	26.22	9.11	0.437918	1.24725e-14	1.51311	1.06536e-224	2.91394	1.47373e-243	3.98913	0	1.82695	0			K01723//hydroperoxide dehydratase [EC:4.2.1.92]+ko00592//alpha-Linolenic acid metabolism+ko01100//Metabolic pathways+ko01110//Biosynthesis of secondary metabolites	XP_020148057.1|3.0e-253|allene oxide synthase 2-like [Aegilops tauschii subsp. tauschii]	GO:1901615//organic hydroxy compound metabolic process;GO:0071704//organic substance metabolic process;GO:1901360//organic cyclic compound metabolic process;GO:0008202//steroid metabolic process;GO:0016125//sterol metabolic process;GO:0008152//metabolic process;GO:0006629//lipid metabolic process;GO:0044238//primary metabolic process;GO:0046872//metal ion binding;GO:0005506//iron ion binding;GO:0…
TraesCS4A02G074800	7.55	9.1	8.02	11.26	11.39	12.61	42.68	61.28	52.53	14.05	15.01	13.32	2.66678	0	0.787172	5.7738e-59	2.14454	0	0.264928	2.6622e-09	1.73543	0			K00002//alcohol dehydrogenase (NADP+) [EC:1.1.1.2]+ko00010//Glycolysis / Gluconeogenesis+ko00040//Pentose and glucuronate interconversions+ko01100//Metabolic pathways+ko01110//Biosynthesis of secondary metabolites+ko00561//Glycerolipid metabolism;K19642//D-galacturonate reductase [EC:1.1.1.365]+ko00053//Ascorbate and aldarate metabolism;K00011//aldehyde reductase [EC:1.1.1.21]+ko00040//Pentose an…	ARQ30105.1|5.2e-183|deoxymugineic acid synthase [Triticum aestivum]	GO:0033554//cellular response to stress;GO:0031667//response to nutrient levels;GO:0044237//cellular metabolic process;GO:0042594//response to starvation;GO:0043603//cellular amide metabolic process;GO:0009991//response to extracellular stimulus;GO:0006518//peptide metabolic process;GO:0019184//nonribosomal peptide biosynthetic process;GO:0031668//cellular response to extracellular stimulus;GO:19…
TraesCS5A02G305200	6.66	6.09	4.99	5.53	7.21	6.03	19.06	22.41	15.11	8.86	9.68	9.83	1.64978	0	0.662501	1.62788e-49	1.55575	0	0.568469	6.58609e-38	1.19444	0			K01184//polygalacturonase [EC:3.2.1.15]+ko00040//Pentose and glucuronate interconversions+ko01100//Metabolic pathways;K15503//serine/threonine-protein phosphatase 6 regulatory ankyrin repeat subunit B;K10380//ankyrin;K15503//serine/threonine-protein phosphatase 6 regulatory ankyrin repeat subunit B;K01184//polygalacturonase [EC:3.2.1.15]+ko00040//Pentose and glucuronate interconversions+ko01100//…	XP_003578456.1|1.7e-289|PREDICTED: ankyrin repeat-containing protein At5g02620-like [Brachypodium distachyon]	GO:0016021//integral component of membrane;GO:0044425//membrane part;GO:0016020//membrane;GO:0031224//intrinsic component of membrane;
TraesCS1D02G430000	1.68	1.39	1	0.67	1.26	0.87	4.63	4.76	2.58	1.92	2.26	2.01	1.55962	8.97601e-44	0.610267	4.40527e-06	2.09088	2.96452e-64	1.14152	5.54531e-15	1.40462	3.84088e-56	WRKY		K18835//WRKY transcription factor 2+ko04626//Plant-pathogen interaction	XP_020180591.1|2.5e-173|probable WRKY transcription factor 28 [Aegilops tauschii subsp. tauschii]
TraesCS6A02G001200	9.73	12.46	5.79	2.12	6.14	3.93	21.37	19.52	31.44	9.72	24.72	12.2	1.3717	2.57449e-159	0.749036	1.87254e-39	2.55832	0	1.93566	1.72471e-167	1.56757	0			K12121//phytochrome B+ko04712//Circadian rhythm - plant;K00703//starch synthase [EC:2.4.1.21]+ko01100//Metabolic pathways+ko00500//Starch and sucrose metabolism+ko01110//Biosynthesis of secondary metabolites	EMS63128.1|8.3e-185|hypothetical protein TRIUR3_19388 [Triticum urartu]
TraesCS7A02G176700	3.75	2.02	1.55	3.01	6.13	3.44	8.13	10.29	6.17	7.97	6.33	6.53	1.7527	1.17565e-172	1.51445	1.36741e-118	0.964669	1.43093e-69	0.72642	5.94455e-37	1.19391	1.07062e-178		RING/U-box superfamily protein (best arabidopsis hit)	K10664//E3 ubiquitin-protein ligase ATL6/9/15/31/42/55 [EC:2.3.2.27]	XP_020149927.1|1.2e-217|E3 ubiquitin-protein ligase ATL31-like [Aegilops tauschii subsp. tauschii]	GO:0044237//cellular metabolic process;GO:0009057//macromolecule catabolic process;GO:0006807//nitrogen compound metabolic process;GO:1901565//organonitrogen compound catabolic process;GO:0044257//cellular protein catabolic process;GO:0010498//proteasomal protein catabolic process;GO:1901564//organonitrogen compound metabolic process;GO:0043170//macromolecule metabolic process;GO:0044260//cellula…
TraesCS5A02G212400	1.71	0.47	0.92	0.87	1.29	0.75	4.58	5.95	3.18	3.09	3.07	3.65	2.14655	1.09687e-102	1.66407	8.32436e-53	2.23696	1.81481e-107	1.75448	1.74533e-56	1.97118	4.00299e-156			K22020//mucin-19	XP_020183663.1|2.4e-179|uncharacterized protein LOC109769320 [Aegilops tauschii subsp. tauschii]
TraesCS1B02G400500	1.41	2.11	1.39	2.56	2.02	2.51	5.73	5.91	5.94	5.62	3.47	7.38	1.84339	2.67734e-176	1.74302	1.40532e-151	1.30882	3.03973e-107	1.20845	4.23085e-88	1.50375	8.26861e-253			K18207//protein O-mannose beta-1,4-N-acetylglucosaminyltransferase [EC:2.4.1.312]+ko00515//Mannose type O-glycan biosynthesis+ko01100//Metabolic pathways;K18207//protein O-mannose beta-1,4-N-acetylglucosaminyltransferase [EC:2.4.1.312]+ko00515//Mannose type O-glycan biosynthesis+ko01100//Metabolic pathways	XP_020182595.1|1.1e-290|uncharacterized protein LOC109768266 [Aegilops tauschii subsp. tauschii]
TraesCS4B02G187800	32.4	28.2	29.32	51.03	62.11	60	163.69	129.09	80.03	75.61	84.28	76.54	2.0565	0	1.40408	0	1.10008	0	0.447665	2.68958e-68	1.21504	0				ABX89061.1|9.6e-84|pathogenesis-related protein [Triticum aestivum]
TraesCS1B02G413900	1.54	0.95	1.08	0.7	0.84	1.01	2.32	3.01	5.73	0.68	0.93	0.65	1.62742	1.97197e-59	-0.650514	1.26857e-05	2.10514	4.1967e-83	-0.172787	0.286953	1.12192	4.20702e-41			K02184//formin 2;K11367//chromodomain-helicase-DNA-binding protein 1 [EC:3.6.4.12]	XP_020182183.1|4.2e-232|uncharacterized protein LOC109767871 [Aegilops tauschii subsp. tauschii]	GO:0031224//intrinsic component of membrane;GO:0016020//membrane;GO:0044425//membrane part;GO:0016021//integral component of membrane;GO:0008375//acetylglucosaminyltransferase activity;GO:0016757//transferase activity, transferring glycosyl groups;GO:0008194//UDP-glycosyltransferase activity;GO:0003824//catalytic activity;GO:0016758//transferase activity, transferring hexosyl groups;GO:0016740//t…
TraesCS4A02G404600	1.4	0.85	0.38	1.34	1.89	0.85	2.67	4.51	1.41	1.96	2.4	1.59	1.71487	1.94833e-43	1.18811	2.98509e-18	1.07258	5.53303e-22	0.545829	8.09112e-06	1.12196	1.03314e-38		RING/U-box superfamily protein (best arabidopsis hit)	K10664//E3 ubiquitin-protein ligase ATL6/9/15/31/42/55 [EC:2.3.2.27]	XP_020153278.1|3.8e-197|E3 ubiquitin-protein ligase Os03g0188200-like [Aegilops tauschii subsp. tauschii]	GO:0019941//modification-dependent protein catabolic process;GO:0036211//protein modification process;GO:0044248//cellular catabolic process;GO:1901575//organic substance catabolic process;GO:1901565//organonitrogen compound catabolic process;GO:0032446//protein modification by small protein conjugation;GO:1901564//organonitrogen compound metabolic process;GO:0009057//macromolecule catabolic proc…
TraesCS4B02G231400	1.45	1.62	1.34	0.83	0.77	0.71	5.22	5.87	3.31	8.21	6.76	7.7	1.7122	1.13928e-95	2.36601	5.95709e-225	2.64141	8.6798e-163	3.29522	0	2.46271	0			K01580//glutamate decarboxylase [EC:4.1.1.15]+ko00410//beta-Alanine metabolism+ko00250//Alanine, aspartate and glutamate metabolism+ko00430//Taurine and hypotaurine metabolism+ko01100//Metabolic pathways+ko00650//Butanoate metabolism+ko01110//Biosynthesis of secondary metabolites	EMT04913.1|8.5e-285|Glutamate decarboxylase 1 [Aegilops tauschii]	GO:0006082//organic acid metabolic process;GO:0006536//glutamate metabolic process;GO:0043436//oxoacid metabolic process;GO:0044238//primary metabolic process;GO:0009987//cellular process;GO:0043648//dicarboxylic acid metabolic process;GO:0044281//small molecule metabolic process;GO:0006520//cellular amino acid metabolic process;GO:0009064//glutamine family amino acid metabolic process;GO:1901564…
TraesCS5B02G460200	9.65	5.5	5.29	4.3	7.23	4.87	16.66	23.84	10.21	9.65	10.01	7.95	1.31435	1.50395e-281	0.438473	1.24482e-24	1.62725	0	0.751375	8.30755e-62	1.09181	0			K20843//hydroxyproline O-galactosyltransferase 2/3/4/5/6 [EC:2.4.1.-]	XP_007147945.1|3.5e-163|hypothetical protein PHAVU_006G167800g [Phaseolus vulgaris]	GO:0009059//macromolecule biosynthetic process;GO:1901576//organic substance biosynthetic process;GO:0019538//protein metabolic process;GO:1901137//carbohydrate derivative biosynthetic process;GO:0006464//cellular protein modification process;GO:1901566//organonitrogen compound biosynthetic process;GO:0006807//nitrogen compound metabolic process;GO:0009987//cellular process;GO:0044249//cellular b…
TraesCS6B02G364600	2.56	2.92	1.94	0.88	1.58	0.79	8.94	6.05	8.34	1.41	2.24	1.31	1.65722	1.99862e-169	-0.568351	1.11664e-10	2.83105	0	0.605479	2.22783e-08	1.4107	3.62988e-162			K00366//ferredoxin-nitrite reductase [EC:1.7.7.1]+ko00910//Nitrogen metabolism;K00366//ferredoxin-nitrite reductase [EC:1.7.7.1]+ko00910//Nitrogen metabolism	XP_020164635.1|0.0e+00|ferredoxin--nitrite reductase, chloroplastic [Aegilops tauschii subsp. tauschii]
TraesCS2A02G026500	5.68	3.15	2.78	3.16	3.83	4.15	29.22	31.55	12.8	15.77	23.93	10.62	2.5921	0	1.99944	2.49015e-304	2.71443	0	2.12177	0	2.38742	0			K13229//2,4-dihydroxy-1,4-benzoxazin-3-one-glucoside dioxygenase [EC:1.14.20.2]+ko00402//Benzoxazinoid biosynthesis;K06892//feruloyl-CoA ortho-hydroxylase [EC:1.14.11.-]+ko01110//Biosynthesis of secondary metabolites+ko00940//Phenylpropanoid biosynthesis;K13229//2,4-dihydroxy-1,4-benzoxazin-3-one-glucoside dioxygenase [EC:1.14.20.2]+ko00402//Benzoxazinoid biosynthesis;K06892//feruloyl-CoA ortho-h…	XP_020166943.1|9.0e-188|1-aminocyclopropane-1-carboxylate oxidase homolog 1-like [Aegilops tauschii subsp. tauschii]	GO:0005488//binding;GO:0003824//catalytic activity;GO:0016491//oxidoreductase activity;GO:0043167//ion binding;GO:0046872//metal ion binding;GO:0043169//cation binding;
BGI_novel_G000007	8.63	13.35	13.53	13.57	12.75	14.13	31.82	37.94	28.64	33.84	40.13	20.68	1.47294	6.20127e-135	1.42841	2.44552e-124	1.26802	2.94646e-107	1.22349	6.92336e-98	1.34538	4.83672e-229			K01601//ribulose-bisphosphate carboxylase large chain [EC:4.1.1.39]+ko01100//Metabolic pathways+ko00710//Carbon fixation in photosynthetic organisms+ko01200//Carbon metabolism+ko00630//Glyoxylate and dicarboxylate metabolism
TraesCS4B02G033500	5.82	5.65	6.3	0.29	0.74	0.37	13.38	10.79	14.89	0.9	1.05	0.68	1.13907	1.13768e-25	-2.73625	1.35377e-37	4.79012	1.75807e-120	0.914796	0.0231955	1.12577	7.93072e-27		Leucine-rich repeat protein kinase family protein (best arabidopsis hit)		ACQ41882.1|8.2e-65|germin-like protein 2 [Triticum aestivum]
TraesCS6B02G167100	6.99	6.96	4.95	6.44	5.46	5.35	21.93	23.06	17.32	9.58	10.97	10.43	1.72423	0	0.716744	1.04179e-108	1.85212	0	0.844632	4.40514e-143	1.37199	0	ARF		K14486//auxin response factor+ko04075//Plant hormone signal transduction;K14486//auxin response factor+ko04075//Plant hormone signal transduction;K14486//auxin response factor+ko04075//Plant hormone signal transduction	XP_020199461.1|0.0e+00|auxin response factor 6-like [Aegilops tauschii subsp. tauschii]	GO:0034654//nucleobase-containing compound biosynthetic process;GO:0060255//regulation of macromolecule metabolic process;GO:0034645//cellular macromolecule biosynthetic process;GO:1901362//organic cyclic compound biosynthetic process;GO:0009058//biosynthetic process;GO:0007154//cell communication;GO:0019438//aromatic compound biosynthetic process;GO:0016070//RNA metabolic process;GO:0019219//reg…
TraesCS7B02G076900	6.23	6.95	4.05	3.9	6.44	7.34	15.47	14.65	13.26	17.04	9.94	18.71	1.33942	2.11641e-25	1.44011	6.64121e-30	1.2639	2.98016e-23	1.36458	1.44575e-27	1.35225	2.98409e-51			K03327//multidrug resistance protein, MATE family;K02183//calmodulin+ko04016//MAPK signaling pathway - plant+ko04626//Plant-pathogen interaction+ko04070//Phosphatidylinositol signaling system	XP_020153933.1|8.1e-49|uncharacterized protein LOC109739254 [Aegilops tauschii subsp. tauschii]	GO:0005509//calcium ion binding;GO:0046872//metal ion binding;GO:0043167//ion binding;GO:0043169//cation binding;GO:0005488//binding;
TraesCS2B02G307200	4.17	3.45	1.76	2.01	2.93	2.25	9.71	14.36	8.88	6.79	9.9	7.48	1.81586	1.97164e-117	1.37474	2.27248e-58	2.19001	8.94004e-149	1.74889	8.282e-82	1.78757	2.9106e-197			K15255//ATP-dependent DNA helicase PIF1 [EC:3.6.4.12];K01206//alpha-L-fucosidase [EC:3.2.1.51]+ko00511//Other glycan degradation;K13171//serine/arginine repetitive matrix protein 1+ko03015//mRNA surveillance pathway+ko03013//RNA transport;K21952//CASK-interacting protein	XP_020169835.1|6.1e-178|desiccation-related protein PCC13-62-like [Aegilops tauschii subsp. tauschii]
BGI_novel_G013159	2.45	1.18	0.75	1.83	4.74	2.5	11.43	17.74	4.21	2.78	5.67	1.43	2.93656	1.35313e-280	1.18453	2.28922e-26	1.87869	8.90487e-166	0.126658	0.17341	1.69516	8.89739e-187			K00430//peroxidase [EC:1.11.1.7]+ko01100//Metabolic pathways+ko01110//Biosynthesis of secondary metabolites+ko00940//Phenylpropanoid biosynthesis
TraesCS2D02G081400	6.14	3.06	3.95	7.93	10.99	7.43	43.79	61.71	21.28	11.3	16.86	8.59	3.27307	0	1.48895	2.03635e-192	2.26666	0	0.482529	4.76111e-30	2.05891	0		Triticum aestivum clone wlmk4.pk0025.f7:fis, full insert mRNA sequence	K08472//mlo protein;K08472//mlo protein;K08472//mlo protein	XP_020161016.1|2.8e-288|MLO-like protein 1 [Aegilops tauschii subsp. tauschii]
TraesCS5D02G210900	9.36	1.38	0.95	2.85	10.54	2.52	12.93	23.93	3.88	5.35	11.54	1.95	1.80757	2.32809e-201	0.699958	5.08171e-22	1.35476	2.10614e-132	0.247152	0.000237569	1.11786	2.47598e-143	MYB		K09422//transcription factor MYB, plant	XP_020186333.1|8.7e-167|protein ODORANT1-like [Aegilops tauschii subsp. tauschii]	GO:0051171//regulation of nitrogen compound metabolic process;GO:0019222//regulation of metabolic process;GO:0050794//regulation of cellular process;GO:0006355//regulation of transcription, DNA-templated;GO:0010468//regulation of gene expression;GO:0006357//regulation of transcription from RNA polymerase II promoter;GO:0009987//cellular process;GO:0080090//regulation of primary metabolic process;…
BGI_novel_G007542	1.7	1.14	1.15	2.38	1.75	3.46	1.69	1.61	1.78	10.7	9.53	11.73	0.351485	0.017936	3.01174	1.65027e-225	-0.587723	3.3823e-06	2.07254	7.02848e-148	1.67441	1.02489e-128
TraesCS4D02G056900	15.48	11.93	10.03	18.85	25.41	21.55	34.92	35.45	30.23	46.91	37.71	54.41	1.43381	0	1.90203	0	0.611583	4.50023e-172	1.0798	0	1.21836	0			K13412//calcium-dependent protein kinase [EC:2.7.11.1]+ko04626//Plant-pathogen interaction;K13172//serine/arginine repetitive matrix protein 2;K13412//calcium-dependent protein kinase [EC:2.7.11.1]+ko04626//Plant-pathogen interaction;K13172//serine/arginine repetitive matrix protein 2	XP_020152395.1|1.0e-182|transcription factor bHLH18-like [Aegilops tauschii subsp. tauschii]	GO:0005622//intracellular;GO:0043231//intracellular membrane-bounded organelle;GO:0044424//intracellular part;GO:0043229//intracellular organelle;GO:0005634//nucleus;GO:0043227//membrane-bounded organelle;GO:0044464//cell part;GO:0043226//organelle;GO:0005623//cell;GO:0003676//nucleic acid binding;GO:0005515//protein binding;GO:0003677//DNA binding;GO:0046983//protein dimerization activity;GO:190…
BGI_novel_G005291	6.69	5.03	5.21	4.46	4.48	7.1	19.56	17.54	17.57	6.65	5.75	8.95	1.69237	1.64298e-289	0.336664	1.18858e-08	1.76525	1.5637e-305	0.409545	8.37435e-12	1.20803	2.48161e-242			K22020//mucin-19
TraesCS4B02G308300	1.87	1.4	0.72	0.42	0.91	0.72	2.62	3.21	1.76	4.94	4.13	4	0.937392	2.06928e-18	1.72777	5.75591e-76	1.90275	7.92357e-51	2.69312	4.84569e-130	1.78478	4.67741e-124	bHLH		K13422//transcription factor MYC2+ko04016//MAPK signaling pathway - plant+ko04075//Plant hormone signal transduction;K13422//transcription factor MYC2+ko04016//MAPK signaling pathway - plant+ko04075//Plant hormone signal transduction	XP_020181335.1|1.4e-182|transcription factor NAI1-like [Aegilops tauschii subsp. tauschii]
TraesCS3A02G180100	3.32	5.1	2.24	4.14	5.77	7.78	9.83	12.73	8.95	16.85	7.52	13.35	1.56808	1.0222e-94	1.83198	7.92714e-140	0.826446	5.18531e-35	1.09035	8.81853e-65	1.289	5.65896e-153			K00430//peroxidase [EC:1.11.1.7]+ko01100//Metabolic pathways+ko01110//Biosynthesis of secondary metabolites+ko00940//Phenylpropanoid biosynthesis	XP_020153991.1|2.2e-183|peroxidase 72-like [Aegilops tauschii subsp. tauschii]
TraesCS4A02G227400	1.09	1.56	1.15	1.4	1.45	1.13	3.57	4.17	3.22	1.75	1.44	2.52	1.53131	8.15566e-31	0.594828	0.000144834	1.45386	1.58529e-28	0.517373	0.000833126	1.10155	3.17118e-28	AP2-EREBP	Malus x domestica AP2 domain class transcription factor (AP2D43) mRNA, complete cds	K09286//EREBP-like factor	XP_020194566.1|6.0e-106|ethylene-responsive transcription factor ERF022-like [Aegilops tauschii subsp. tauschii]	GO:0016070//RNA metabolic process;GO:0006725//cellular aromatic compound metabolic process;GO:0009987//cellular process;GO:0044271//cellular nitrogen compound biosynthetic process;GO:0034654//nucleobase-containing compound biosynthetic process;GO:0006139//nucleobase-containing compound metabolic process;GO:0097659//nucleic acid-templated transcription;GO:0006351//transcription, DNA-templated;GO:1…
TraesCS6B02G150300	2.09	1.82	1.17	2.32	3.75	4.37	10.6	12.55	6.97	7.38	5.57	8.28	2.41548	0	1.94819	2.6019e-258	1.43252	2.0021e-231	0.965235	4.93387e-90	1.63077	0			K01179//endoglucanase [EC:3.2.1.4]+ko01100//Metabolic pathways+ko00500//Starch and sucrose metabolism;K01179//endoglucanase [EC:3.2.1.4]+ko01100//Metabolic pathways+ko00500//Starch and sucrose metabolism	XP_020157296.1|0.0e+00|endoglucanase 5-like [Aegilops tauschii subsp. tauschii]	GO:0016052//carbohydrate catabolic process;GO:0009251//glucan catabolic process;GO:0051275//beta-glucan catabolic process;GO:0000272//polysaccharide catabolic process;GO:0044264//cellular polysaccharide metabolic process;GO:0009987//cellular process;GO:0044247//cellular polysaccharide catabolic process;GO:1901575//organic substance catabolic process;GO:0009056//catabolic process;GO:0071555//cell …
TraesCS7A02G201400	9.02	5.52	4.69	4.65	7.57	4.96	20.7	27.35	14.65	11.18	9.07	11.61	1.70911	2.31394e-298	0.733471	1.39688e-40	1.86463	0	0.888997	1.56153e-55	1.38051	0	Tify		K13464//jasmonate ZIM domain-containing protein+ko04075//Plant hormone signal transduction	XP_020153852.1|5.5e-63|protein TIFY 11e-like [Aegilops tauschii subsp. tauschii]
TraesCS7B02G108000	15.82	8.87	5.76	5.04	7.83	5.36	25.76	31.02	17.85	13.6	11.3	11.68	1.29953	9.02928e-111	0.27776	6.55891e-05	2.02488	2.22439e-206	1.00311	7.40038e-37	1.19624	4.24702e-144			K13464//jasmonate ZIM domain-containing protein+ko04075//Plant hormone signal transduction	XP_020191659.1|4.9e-65|protein TIFY 11e-like [Aegilops tauschii subsp. tauschii]
TraesCS2A02G404600	2.28	1.65	1.31	2.24	3.89	2.46	6.24	6.62	4.45	4.49	4.28	3.8	1.84116	4.19423e-142	1.1692	2.16012e-46	1.0354	3.02453e-60	0.363439	3.41203e-07	1.08949	3.46682e-105			K04733//interleukin-1 receptor-associated kinase 4 [EC:2.7.11.1];K04733//interleukin-1 receptor-associated kinase 4 [EC:2.7.11.1];K00924//kinase [EC:2.7.1.-];K04733//interleukin-1 receptor-associated kinase 4 [EC:2.7.11.1];K04733//interleukin-1 receptor-associated kinase 4 [EC:2.7.11.1];K04733//interleukin-1 receptor-associated kinase 4 [EC:2.7.11.1]	XP_020158587.1|2.0e-251|probable serine/threonine-protein kinase PIX13 isoform X2 [Aegilops tauschii subsp. tauschii]	GO:0008144//drug binding;GO:0043168//anion binding;GO:0030554//adenyl nucleotide binding;GO:0017076//purine nucleotide binding;GO:1901363//heterocyclic compound binding;GO:0036094//small molecule binding;GO:0140096//catalytic activity, acting on a protein;GO:0032553//ribonucleotide binding;GO:0016773//phosphotransferase activity, alcohol group as acceptor;GO:0097367//carbohydrate derivative bindi…
TraesCS3B02G289400	3	1.15	0.83	1.1	3.38	1.22	6.35	6.69	4.5	3.84	3.38	3.26	1.81903	8.84838e-72	1.08095	9.71077e-21	1.61529	9.66009e-61	0.87721	4.79218e-15	1.39399	1.15557e-77			K20716//mitogen-activated protein kinase kinase kinase 17/18+ko04016//MAPK signaling pathway - plant	XP_020179605.1|9.7e-132|mitogen-activated protein kinase kinase kinase 3-like [Aegilops tauschii subsp. tauschii]	GO:0016021//integral component of membrane;GO:0031224//intrinsic component of membrane;GO:0016020//membrane;GO:0044425//membrane part;GO:0016301//kinase activity;GO:0032555//purine ribonucleotide binding;GO:0004674//protein serine/threonine kinase activity;GO:0008144//drug binding;GO:0032553//ribonucleotide binding;GO:0043168//anion binding;GO:0036094//small molecule binding;GO:0003824//catalytic…
TraesCS7B02G456200	18.94	7.81	3.67	5.09	21.05	4.03	31.26	49.33	22.75	17.89	34.77	5.75	1.77014	0	0.954887	1.44629e-126	1.77166	0	0.95641	2.70001e-126	1.42261	0			K16040//trans-resveratrol di-O-methyltransferase [EC:2.1.1.240]+ko00945//Stilbenoid, diarylheptanoid and gingerol biosynthesis;K16040//trans-resveratrol di-O-methyltransferase [EC:2.1.1.240]+ko00945//Stilbenoid, diarylheptanoid and gingerol biosynthesis	XP_020168264.1|7.4e-208|probable O-methyltransferase 2 [Aegilops tauschii subsp. tauschii]
TraesCS2A02G384100	8.13	2.58	3.78	5.16	8.75	3.57	11.14	23.61	8.89	6.42	10.75	2.82	1.60893	0	0.483276	4.30801e-35	1.33386	0	0.208208	2.52621e-08	1.01317	0		NB-ARC domain-containing disease resistance protein (best arabidopsis hit); NB-ARC/LRR disease resistance protein, putative, expressed (best rice hit)	K13459//disease resistance protein RPS2+ko04626//Plant-pathogen interaction;K13459//disease resistance protein RPS2+ko04626//Plant-pathogen interaction;K13459//disease resistance protein RPS2+ko04626//Plant-pathogen interaction	EMS67633.1|0.0e+00|Disease resistance protein RPS2 [Triticum urartu]
TraesCS5B02G336100	5.05	3.79	4.84	3.92	4.56	4.48	4.36	5.04	3.93	13.47	14.19	12.68	-0.036161	0.433658	1.56295	0	0.0397373	0.396939	1.63885	0	1.00713	1.06553e-289			K01115//phospholipase D1/2 [EC:3.1.4.4]+ko04144//Endocytosis+ko01100//Metabolic pathways+ko01110//Biosynthesis of secondary metabolites+ko00564//Glycerophospholipid metabolism+ko00565//Ether lipid metabolism;K01115//phospholipase D1/2 [EC:3.1.4.4]+ko04144//Endocytosis+ko01100//Metabolic pathways+ko01110//Biosynthesis of secondary metabolites+ko00564//Glycerophospholipid metabolism+ko00565//Ether …	PAN13616.1|0.0e+00|hypothetical protein PAHAL_B03692 [Panicum hallii]	GO:0044238//primary metabolic process;GO:0016042//lipid catabolic process;GO:0044255//cellular lipid metabolic process;GO:0046486//glycerolipid metabolic process;GO:0006793//phosphorus metabolic process;GO:0006644//phospholipid metabolic process;GO:1901575//organic substance catabolic process;GO:0071704//organic substance metabolic process;GO:0006650//glycerophospholipid metabolic process;GO:0019…
TraesCS5B02G455500	1.95	0.48	0.66	0.56	1.64	0.75	2.72	3.71	1.37	1.96	3.81	0.9	1.25573	7.16756e-43	1.05345	1.5162e-28	1.35715	6.72093e-48	1.15487	1.05518e-32	1.20835	1.07992e-73			K04733//interleukin-1 receptor-associated kinase 4 [EC:2.7.11.1];K04733//interleukin-1 receptor-associated kinase 4 [EC:2.7.11.1]	XP_020156445.1|0.0e+00|wall-associated receptor kinase 2-like [Aegilops tauschii subsp. tauschii]	GO:0016020//membrane;GO:0031224//intrinsic component of membrane;GO:0044425//membrane part;GO:0016021//integral component of membrane;GO:0030246//carbohydrate binding;GO:0046872//metal ion binding;GO:0000166//nucleotide binding;GO:0001871//pattern binding;GO:0032555//purine ribonucleotide binding;GO:0003824//catalytic activity;GO:0140096//catalytic activity, acting on a protein;GO:0097367//carboh…
TraesCS7A02G503500	0.47	2.56	1.06	1.33	1.06	1.46	1.55	1.08	2.34	2.73	1.72	6.68	0.277541	0.4608	1.48562	1.2221e-06	0.31824	0.402185	1.52632	7.89464e-07	1.02099	1.54409e-05
TraesCS6B02G245100	4.7	2.99	3.12	4.35	5.44	3.56	9.58	12.63	5.24	5.03	18.6	3.66	1.32356	4.92172e-230	1.2724	9.07579e-208	0.944334	8.93753e-134	0.89318	4.34216e-117	1.09723	0			K03526//(E)-4-hydroxy-3-methylbut-2-enyl-diphosphate synthase [EC:1.17.7.1 1.17.7.3]+ko00900//Terpenoid backbone biosynthesis+ko01100//Metabolic pathways+ko01110//Biosynthesis of secondary metabolites;K03526//(E)-4-hydroxy-3-methylbut-2-enyl-diphosphate synthase [EC:1.17.7.1 1.17.7.3]+ko00900//Terpenoid backbone biosynthesis+ko01100//Metabolic pathways+ko01110//Biosynthesis of secondary metabolit…	XP_020161478.1|0.0e+00|4-hydroxy-3-methylbut-2-en-1-yl diphosphate synthase (ferredoxin), chloroplastic isoform X2 [Aegilops tauschii subsp. tauschii]	GO:0001101//response to acid chemical;GO:0006793//phosphorus metabolic process;GO:0007165//signal transduction;GO:0032787//monocarboxylic acid metabolic process;GO:0006721//terpenoid metabolic process;GO:0006082//organic acid metabolic process;GO:0019682//glyceraldehyde-3-phosphate metabolic process;GO:0014070//response to organic cyclic compound;GO:0009058//biosynthetic process;GO:0008610//lipid…
TraesCS2A02G286700	20.9	11.82	11.54	13.6	27.02	19.42	59.38	73.84	34.09	37.68	41.01	30.61	1.72209	0	1.21314	0	1.24986	0	0.740907	1.04784e-169	1.2373	0	Tify		K13464//jasmonate ZIM domain-containing protein+ko04075//Plant hormone signal transduction;K13464//jasmonate ZIM domain-containing protein+ko04075//Plant hormone signal transduction;K13464//jasmonate ZIM domain-containing protein+ko04075//Plant hormone signal transduction;K13464//jasmonate ZIM domain-containing protein+ko04075//Plant hormone signal transduction	XP_020151845.1|3.1e-84|protein TIFY 9-like [Aegilops tauschii subsp. tauschii]	GO:0009890//negative regulation of biosynthetic process;GO:0010605//negative regulation of macromolecule metabolic process;GO:0051253//negative regulation of RNA metabolic process;GO:2001141//regulation of RNA biosynthetic process;GO:0048583//regulation of response to stimulus;GO:0031326//regulation of cellular biosynthetic process;GO:1903507//negative regulation of nucleic acid-templated transcr…
TraesCS1D02G363800	5.88	4.16	3.81	4.53	6.38	5.02	15.1	18.93	11.23	11.43	9.34	11.89	1.71183	1.176e-243	1.24261	1.43877e-109	1.50258	2.98985e-201	1.03336	1.40289e-81	1.38976	2.5985e-307			K08818//cell division cycle 2-like [EC:2.7.11.22]	XP_020147516.1|6.8e-187|putative cyclin-dependent kinase F-2 [Aegilops tauschii subsp. tauschii]	GO:0043085//positive regulation of catalytic activity;GO:0060255//regulation of macromolecule metabolic process;GO:0048518//positive regulation of biological process;GO:0031401//positive regulation of protein modification process;GO:0044093//positive regulation of molecular function;GO:0080090//regulation of primary metabolic process;GO:0051338//regulation of transferase activity;GO:1904029//regu…
TraesCS1D02G428200	2.72	1.86	1.3	1.04	2.5	0.61	9.56	21.5	10.29	7.68	8.53	2.5	2.81739	2.19481e-206	1.68143	9.95743e-51	3.3095	1.21682e-238	2.17354	2.12801e-70	2.58587	1.48798e-272			K08914//light-harvesting complex II chlorophyll a/b binding protein 3+ko01100//Metabolic pathways+ko00196//Photosynthesis - antenna proteins	P27523.1|1.2e-153|RecName: Full=Chlorophyll a-b binding protein of LHCII type III, chloroplastic; Short=CAB; Flags: Precursor	GO:0044260//cellular macromolecule metabolic process;GO:0044238//primary metabolic process;GO:0006091//generation of precursor metabolites and energy;GO:0008152//metabolic process;GO:0018298//protein-chromophore linkage;GO:0044267//cellular protein metabolic process;GO:0043170//macromolecule metabolic process;GO:0009765//photosynthesis, light harvesting;GO:0006464//cellular protein modification p…
TraesCS7B02G433100	33.34	20.03	26.67	0	0.13	1.38	40.94	50.06	37.05	31.43	38.07	21.02	0.670661	7.96476e-45	0.193005	0.000207306	6.36146	0	5.8838	0	1.41875	1.89505e-255			K13448//calcium-binding protein CML+ko04626//Plant-pathogen interaction;K13448//calcium-binding protein CML+ko04626//Plant-pathogen interaction	XP_020179143.1|3.9e-69|probable calcium-binding protein CML25/26 [Aegilops tauschii subsp. tauschii]
TraesCS6B02G342600	6.52	3.95	2.82	5.4	13.08	6.93	24.72	35.01	14.88	12.45	13.72	7.79	2.49779	0	1.38127	1.13144e-215	1.53659	0	0.420073	2.80055e-29	1.49131	0			K01179//endoglucanase [EC:3.2.1.4]+ko01100//Metabolic pathways+ko00500//Starch and sucrose metabolism;K01179//endoglucanase [EC:3.2.1.4]+ko01100//Metabolic pathways+ko00500//Starch and sucrose metabolism	XP_020159018.1|6.7e-303|endoglucanase 7-like [Aegilops tauschii subsp. tauschii]	GO:0009056//catabolic process;GO:0009251//glucan catabolic process;GO:0016052//carbohydrate catabolic process;GO:0044238//primary metabolic process;GO:0043170//macromolecule metabolic process;GO:0044248//cellular catabolic process;GO:0051275//beta-glucan catabolic process;GO:0030245//cellulose catabolic process;GO:0044247//cellular polysaccharide catabolic process;GO:0000272//polysaccharide catab…
TraesCS1D02G376800	1.7	1.35	1.18	3.46	4.18	2.31	13.01	16.71	8.63	6.1	4.45	5.77	3.18337	0	1.95135	1.31734e-101	1.94453	3.37127e-235	0.712503	4.37722e-22	1.95302	0		Malus x domestica AP2 domain class transcription factor (AP2D43) mRNA, complete cds	K09286//EREBP-like factor	XP_020149086.1|8.2e-190|ethylene-responsive transcription factor ERF109-like [Aegilops tauschii subsp. tauschii]	GO:0009058//biosynthetic process;GO:0006139//nucleobase-containing compound metabolic process;GO:1901700//response to oxygen-containing compound;GO:0008152//metabolic process;GO:0009987//cellular process;GO:0071704//organic substance metabolic process;GO:0032774//RNA biosynthetic process;GO:0010467//gene expression;GO:0009607//response to biotic stimulus;GO:0048731//system development;GO:0048856/…
TraesCS2A02G276500	2.32	0.74	0.94	0.36	1.69	0.72	6.36	6.3	2.31	1.12	3.2	1.49	1.92921	1.74966e-09	0.590046	0.145606	2.40089	5.71015e-12	1.06172	0.0160761	1.62922	2.68021e-10				EMS51020.1|8.9e-23|hypothetical protein TRIUR3_21053 [Triticum urartu]
TraesCS3A02G129900	4.73	6.27	2.8	8.03	6.74	6.81	14.87	15.41	13.17	9.01	7.61	11.03	1.65826	4.50668e-193	1.00807	5.8497e-58	1.00478	1.4951e-89	0.354587	2.85176e-10	1.00961	1.32686e-146			K00430//peroxidase [EC:1.11.1.7]+ko01100//Metabolic pathways+ko01110//Biosynthesis of secondary metabolites+ko00940//Phenylpropanoid biosynthesis	EMS45622.1|3.9e-183|Peroxidase 25 [Triticum urartu]	GO:0051186//cofactor metabolic process;GO:0072593//reactive oxygen species metabolic process;GO:0008152//metabolic process;GO:0050896//response to stimulus;GO:0044248//cellular catabolic process;GO:0017144//drug metabolic process;GO:0044237//cellular metabolic process;GO:0006979//response to oxidative stress;GO:0009987//cellular process;GO:0009056//catabolic process;GO:0042737//drug catabolic pro…
TraesCS5D02G448400	0.85	0.51	0.57	1.18	1.73	1.19	6.91	8.12	7.59	9.34	6.96	5.11	3.55648	4.30258e-291	3.41341	7.29205e-254	2.52053	5.76375e-209	2.37746	3.79448e-176	2.88051	0			K13222//indole-3-glycerol-phosphate lyase [EC:4.1.2.8]+ko00402//Benzoxazinoid biosynthesis+ko01100//Metabolic pathways;K13222//indole-3-glycerol-phosphate lyase [EC:4.1.2.8]+ko00402//Benzoxazinoid biosynthesis+ko01100//Metabolic pathways;K13222//indole-3-glycerol-phosphate lyase [EC:4.1.2.8]+ko00402//Benzoxazinoid biosynthesis+ko01100//Metabolic pathways	XP_020172905.1|1.4e-99|tryptophan synthase alpha chain-like [Aegilops tauschii subsp. tauschii]	GO:0016835//carbon-oxygen lyase activity;GO:0016836//hydro-lyase activity;GO:0003824//catalytic activity;GO:0004834//tryptophan synthase activity;GO:0016829//lyase activity;
TraesCS1A02G072800	3.68	3.77	2.61	1.55	1.16	1.23	5.98	7.22	4.7	4.24	4.02	3.49	0.836105	4.69949e-35	0.231765	0.0021113	2.17959	6.61967e-143	1.57525	2.88824e-61	1.08495	1.29327e-86			K16670//homeobox protein Meis2	XP_020178258.1|1.0e-177|homeobox protein knotted-1-like 10 [Aegilops tauschii subsp. tauschii]	GO:0031323//regulation of cellular metabolic process;GO:2001141//regulation of RNA biosynthetic process;GO:0050794//regulation of cellular process;GO:0019219//regulation of nucleobase-containing compound metabolic process;GO:0010556//regulation of macromolecule biosynthetic process;GO:0019222//regulation of metabolic process;GO:2000112//regulation of cellular macromolecule biosynthetic process;GO…
TraesCS3B02G347400	1.89	3.74	1.78	0.64	0.69	1.15	2.66	2.81	2.32	4.56	2.78	6.69	0.0765511	0.63141	0.934083	1.28277e-11	1.63883	5.46022e-15	2.49636	3.87927e-43	1.14134	2.87862e-23				XP_020150912.1|5.0e-34|uncharacterized protein LOC109736103 [Aegilops tauschii subsp. tauschii]
BGI_novel_G012636	5.28	5.38	6.97	9.47	5.49	8.77	12.91	10.79	10.95	20.1	17.24	26.7	0.976699	8.91198e-64	1.86505	1.0428e-306	0.540623	1.01137e-23	1.42898	4.23117e-209	1.25205	2.72112e-263			K04733//interleukin-1 receptor-associated kinase 4 [EC:2.7.11.1];K19613//leucine-rich repeat protein SHOC2
TraesCS2B02G291800	9.96	6.67	7.22	7.63	10.42	7.19	19.98	25.53	13.73	14.52	18.05	9.55	1.30548	3.22759e-264	0.821698	2.62644e-89	1.20936	1.51024e-233	0.725574	5.09644e-72	1.03665	0			K17506//protein phosphatase 1L [EC:3.1.3.16];K17505//protein phosphatase 1K [EC:3.1.3.16];K10147//protein phosphatase 1D [EC:3.1.3.16];K19704//protein phosphatase PTC1 [EC:3.1.3.16];K17506//protein phosphatase 1L [EC:3.1.3.16];K17505//protein phosphatase 1K [EC:3.1.3.16];K10147//protein phosphatase 1D [EC:3.1.3.16];K19704//protein phosphatase PTC1 [EC:3.1.3.16]	XP_020159222.1|4.3e-301|probable protein phosphatase 2C 38 [Aegilops tauschii subsp. tauschii]	GO:0003824//catalytic activity;GO:0016788//hydrolase activity, acting on ester bonds;GO:0004721//phosphoprotein phosphatase activity;GO:0140096//catalytic activity, acting on a protein;GO:0016787//hydrolase activity;GO:0042578//phosphoric ester hydrolase activity;GO:0004722//protein serine/threonine phosphatase activity;GO:0016791//phosphatase activity;
TraesCS6B02G283600	2.84	2.29	2.59	2.81	3.33	2.83	6.94	8.52	4.19	5.02	5.28	5.25	1.42518	6.6094e-117	1.03652	1.00741e-54	1.17265	1.746e-86	0.783993	1.14546e-34	1.11394	2.79238e-139			K00924//kinase [EC:2.7.1.-];K00924//kinase [EC:2.7.1.-];K00924//kinase [EC:2.7.1.-];K00924//kinase [EC:2.7.1.-]	XP_020184210.1|1.9e-252|probable serine/threonine-protein kinase PBL19 [Aegilops tauschii subsp. tauschii]	GO:0007165//signal transduction;GO:0051716//cellular response to stimulus;GO:0007166//cell surface receptor signaling pathway;GO:0006468//protein phosphorylation;GO:0006793//phosphorus metabolic process;GO:1901564//organonitrogen compound metabolic process;GO:0044260//cellular macromolecule metabolic process;GO:0006464//cellular protein modification process;GO:0044238//primary metabolic process;G…
TraesCS2D02G162800	3.96	3.21	2.35	1.74	4.82	3.35	7.84	15.7	4.19	8.17	10.41	4.72	1.54762	1.38544e-136	1.29962	1.55897e-88	1.48407	6.5849e-128	1.23607	1.258e-81	1.39775	6.42079e-214			K00487//trans-cinnamate 4-monooxygenase [EC:1.14.13.11]+ko00130//Ubiquinone and other terpenoid-quinone biosynthesis+ko01100//Metabolic pathways+ko01110//Biosynthesis of secondary metabolites+ko00940//Phenylpropanoid biosynthesis+ko00941//Flavonoid biosynthesis+ko00945//Stilbenoid, diarylheptanoid and gingerol biosynthesis+ko00360//Phenylalanine metabolism	BAJ98052.1|9.9e-290|predicted protein [Hordeum vulgare subsp. vulgare]	GO:0044550//secondary metabolite biosynthetic process;GO:0008152//metabolic process;GO:0009058//biosynthetic process;GO:0019748//secondary metabolic process;GO:0031224//intrinsic component of membrane;GO:0044425//membrane part;GO:0016021//integral component of membrane;GO:0016020//membrane;GO:0043167//ion binding;GO:0016705//oxidoreductase activity, acting on paired donors, with incorporation or …
TraesCS2A02G529900	2.91	2.72	3.25	1.37	1.3	1.91	18.06	21.58	10.55	4.81	3.78	4.65	2.50191	0	0.579579	9.44459e-15	3.45416	0	1.53183	3.45823e-67	2.24177	0			K20556//cytochrome P450 family 76 subfamily C	BAJ99998.1|3.6e-266|predicted protein [Hordeum vulgare subsp. vulgare]	GO:0043169//cation binding;GO:0016491//oxidoreductase activity;GO:0005506//iron ion binding;GO:0020037//heme binding;GO:0046914//transition metal ion binding;GO:0046872//metal ion binding;GO:0003824//catalytic activity;GO:1901363//heterocyclic compound binding;GO:0046906//tetrapyrrole binding;GO:0043167//ion binding;GO:0016705//oxidoreductase activity, acting on paired donors, with incorporation …
TraesCS6D02G094700	1.77	1.11	1.5	1.48	2.12	1.52	4.47	3.9	4.42	4.41	7.63	3.58	1.54767	3.02149e-76	1.84291	6.14169e-118	1.31407	1.0005e-59	1.60931	2.15451e-97	1.58093	1.42929e-171			K21374//7-deoxyloganetin glucosyltransferase [EC:2.4.1.324]	XP_020150461.1|4.2e-287|7-deoxyloganetin glucosyltransferase-like isoform X1 [Aegilops tauschii subsp. tauschii]
TraesCS4A02G208400	4.45	5.46	1.46	2.22	3.43	2.42	11.04	16.06	12.4	7.97	11.35	5.67	1.80431	7.43917e-53	1.15845	2.00797e-18	2.27219	2.62602e-70	1.62632	1.18744e-29	1.73318	1.34896e-80				EMS61201.1|5.4e-67|Abscisic stress-ripening protein 2 [Triticum urartu]	GO:0050896//response to stimulus;GO:0006950//response to stress;
TraesCS3D02G269800	12.57	9.98	10.86	11.15	15.33	14.67	33.71	44.44	22.71	23.3	21.27	18.3	1.5973	0	0.91642	6.7595e-184	1.29228	0	0.611402	1.50509e-91	1.13894	0			K20869//putative beta-1,4-xylosyltransferase IRX9 [EC:2.4.2.-]	XP_020180467.1|6.5e-260|probable glucuronosyltransferase Os01g0675500 [Aegilops tauschii subsp. tauschii]	GO:0071840//cellular component organization or biogenesis;GO:0043170//macromolecule metabolic process;GO:0009834//plant-type secondary cell wall biogenesis;GO:0071555//cell wall organization;GO:0045492//xylan biosynthetic process;GO:0009987//cellular process;GO:0045491//xylan metabolic process;GO:0044249//cellular biosynthetic process;GO:0034645//cellular macromolecule biosynthetic process;GO:007…
TraesCS6A02G096300	2.06	2.66	1.87	1.76	1.71	2.47	8.51	2.66	5.1	3.03	2.32	4.36	1.30608	4.60645e-33	0.56435	5.69563e-06	1.44507	4.12359e-38	0.703338	3.6511e-08	1.05215	4.45853e-37			K13412//calcium-dependent protein kinase [EC:2.7.11.1]+ko04626//Plant-pathogen interaction;K00430//peroxidase [EC:1.11.1.7]+ko01100//Metabolic pathways+ko01110//Biosynthesis of secondary metabolites+ko00940//Phenylpropanoid biosynthesis	XP_020174961.1|8.1e-81|bZIP transcription factor 11-like [Aegilops tauschii subsp. tauschii]	GO:0003700//DNA binding transcription factor activity;GO:0140110//transcription regulator activity;
TraesCS7A02G371900	2.92	2.12	0.9	2.25	3.92	2.73	10	16	4.64	2.68	6.06	1.02	2.37489	9.78688e-206	0.732565	1.43412e-12	1.78403	1.94852e-142	0.141708	0.1301	1.45641	8.7395e-141			K10781//fatty acyl-ACP thioesterase B [EC:3.1.2.14 3.1.2.21]+ko01100//Metabolic pathways+ko00061//Fatty acid biosynthesis+ko01212//Fatty acid metabolism;K10781//fatty acyl-ACP thioesterase B [EC:3.1.2.14 3.1.2.21]+ko01100//Metabolic pathways+ko00061//Fatty acid biosynthesis+ko01212//Fatty acid metabolism	XP_020162609.1|4.2e-235|palmitoyl-acyl carrier protein thioesterase, chloroplastic-like [Aegilops tauschii subsp. tauschii]	GO:0016053//organic acid biosynthetic process;GO:0006082//organic acid metabolic process;GO:0006633//fatty acid biosynthetic process;GO:0044281//small molecule metabolic process;GO:0044238//primary metabolic process;GO:0008152//metabolic process;GO:0071704//organic substance metabolic process;GO:1901576//organic substance biosynthetic process;GO:0044249//cellular biosynthetic process;GO:0006631//…
TraesCS4B02G313400	0	0	0	0	0.13	11.46	121.8	66.33	118.65	32.45	29.98	23.53	13.1898	0	11.3706	8.36291e-173	4.70018	0	2.88099	7.17865e-209	5.07211	0			K11855//ubiquitin carboxyl-terminal hydrolase 36/42 [EC:3.4.19.12]	XP_020152838.1|3.1e-73|cortical cell-delineating protein-like [Aegilops tauschii subsp. tauschii]
TraesCS4A02G030400	0	2.17	0	6.65	0	4.65	1.42	0	2.66	7.35	4.17	17.05	0.907611	0.00170084	3.73279	7.76228e-98	-1.49602	5.0338e-15	1.32916	1.17958e-29	1.26766	2.29564e-31			K11252//histone H2B	XP_020174887.1|1.6e-78|histone H2B.1-like [Aegilops tauschii subsp. tauschii]
TraesCS3A02G093600	3.61	3.56	3.67	2.35	4.19	6.46	10.53	8.03	12.19	11.29	8.75	5.44	1.50508	5.00151e-102	1.24238	8.54793e-64	1.23659	9.97856e-76	0.973887	2.09611e-43	1.24068	6.38052e-138			K08235//xyloglucan:xyloglucosyl transferase [EC:2.4.1.207]	CDM81432.1|4.0e-160|unnamed protein product [Triticum aestivum]
TraesCS4B02G070800	2.53	2.28	2.03	3.4	4.77	3.69	8.93	9.53	10.32	3.85	3.39	3.7	2.07456	6.37069e-259	0.682571	8.15695e-19	1.27324	3.56797e-129	-0.118745	0.0773535	1.09067	1.39006e-139			K11968//ariadne-1 [EC:2.3.2.27];K11968//ariadne-1 [EC:2.3.2.27]	BAJ94370.1|3.1e-291|predicted protein [Hordeum vulgare subsp. vulgare]
TraesCS2A02G111300	1.82	2.06	1.4	1.42	2.67	1.25	3.23	6.79	3.98	4.2	4.76	3.73	1.40966	9.23574e-30	1.27459	1.92193e-23	1.38051	9.37924e-29	1.24545	1.44772e-22	1.32955	1.82384e-50			K22048//mechanosensitive ion channel protein 4/5/6/7/8/9/10;K02259//cytochrome c oxidase assembly protein subunit 15+ko00860//Porphyrin and chlorophyll metabolism+ko01100//Metabolic pathways+ko00190//Oxidative phosphorylation+ko01110//Biosynthesis of secondary metabolites;K14325//RNA-binding protein with serine-rich domain 1+ko03015//mRNA surveillance pathway+ko03013//RNA transport	XP_020197458.1|1.9e-52|uncharacterized protein LOC109783267 [Aegilops tauschii subsp. tauschii]	GO:0015979//photosynthesis;GO:0009987//cellular process;GO:0008152//metabolic process;GO:0044237//cellular metabolic process;GO:0055035//plastid thylakoid membrane;GO:0009521//photosystem;GO:0044422//organelle part;GO:0044446//intracellular organelle part;GO:0044444//cytoplasmic part;GO:0009536//plastid;GO:0009523//photosystem II;GO:0043231//intracellular membrane-bounded organelle;GO:0043234//pr…
TraesCS4A02G296300	5.36	1.84	1.71	6.89	22.5	3.92	10.04	10.33	6.7	13.47	49.63	3.21	1.61132	9.5165e-58	2.91409	7.75095e-287	-0.306896	2.1987e-05	0.995874	2.45877e-66	1.14828	2.007e-116		Hordeum vulgare subsp. vulgare mRNA for predicted protein, complete cds, clone: NIASHv2094G16	K04733//interleukin-1 receptor-associated kinase 4 [EC:2.7.11.1]	BAJ96714.1|1.1e-128|predicted protein [Hordeum vulgare subsp. vulgare]
TraesCS7B02G299500	27.83	20.27	19.89	23.62	35.14	29.07	97.26	135.79	56.75	60.93	58.48	58.14	2.09551	0	1.38871	0	1.72167	0	1.01487	0	1.58905	0			K00487//trans-cinnamate 4-monooxygenase [EC:1.14.13.11]+ko00130//Ubiquinone and other terpenoid-quinone biosynthesis+ko01100//Metabolic pathways+ko01110//Biosynthesis of secondary metabolites+ko00940//Phenylpropanoid biosynthesis+ko00941//Flavonoid biosynthesis+ko00945//Stilbenoid, diarylheptanoid and gingerol biosynthesis+ko00360//Phenylalanine metabolism	EMT22866.1|4.2e-290|Trans-cinnamate 4-monooxygenase [Aegilops tauschii]	GO:0044550//secondary metabolite biosynthetic process;GO:0019748//secondary metabolic process;GO:0008152//metabolic process;GO:0009058//biosynthetic process;GO:0044425//membrane part;GO:0016020//membrane;GO:0016021//integral component of membrane;GO:0031224//intrinsic component of membrane;GO:0016709//oxidoreductase activity, acting on paired donors, with incorporation or reduction of molecular o…
TraesCS7D02G122300	1.75	0.35	0.08	0.77	4.23	0.53	4	1.18	0.27	2.07	7.35	0.92	1.33488	1.5563e-08	2.2666	2.31702e-29	-0.0277805	0.881805	0.903946	1.44607e-08	1.0383	3.64386e-15				XP_020152554.1|7.6e-107|dirigent protein 5-like [Aegilops tauschii subsp. tauschii]
TraesCS5A02G386000	8.97	4.01	2.37	7.39	18.75	7.94	41.64	52.84	23	11.11	19.37	6.43	2.9432	0	1.27943	1.30921e-67	1.77983	0	0.116054	0.0544487	1.6504	0			K01870//isoleucyl-tRNA synthetase [EC:6.1.1.5]+ko00970//Aminoacyl-tRNA biosynthesis;K13171//serine/arginine repetitive matrix protein 1+ko03015//mRNA surveillance pathway+ko03013//RNA transport	EMS46181.1|5.2e-93|hypothetical protein TRIUR3_05227 [Triticum urartu]
TraesCS6D02G370800	0.97	0.99	0.71	3.51	3.26	2.35	58.49	104.12	48.62	7.18	8.08	4.28	6.31061	0	2.88115	3.99074e-165	4.53003	0	1.10057	8.15164e-46	4.30085	0			K05953//nicotianamine synthase [EC:2.5.1.43]	AND77090.1|8.2e-186|nicotianamine synthase [Triticum aestivum]
TraesCS5B02G203100	5.75	0.57	0.54	2.33	8.88	1.65	8.82	19.07	3.56	3.46	9.31	1.1	2.2035	1.89371e-195	1.02957	8.83577e-30	1.28848	2.18506e-92	0.11454	0.140459	1.20954	2.31403e-120	MYB		K09422//transcription factor MYB, plant	XP_020186333.1|7.4e-163|protein ODORANT1-like [Aegilops tauschii subsp. tauschii]	GO:0010556//regulation of macromolecule biosynthetic process;GO:0031323//regulation of cellular metabolic process;GO:0050794//regulation of cellular process;GO:0009889//regulation of biosynthetic process;GO:0009987//cellular process;GO:0032502//developmental process;GO:0050789//regulation of biological process;GO:0019222//regulation of metabolic process;GO:2000112//regulation of cellular macromol…
TraesCS2A02G312400	0	0	2.69	0	0.08	6.85	30.73	25.75	69.21	42.21	33.18	58.5	5.53436	0	5.64832	0	4.14469	0	4.25865	0	4.73912	0			K11252//histone H2B	XP_002461154.1|1.3e-53|histone H2B.1 [Sorghum bicolor]	GO:0043231//intracellular membrane-bounded organelle;GO:0005623//cell;GO:0043227//membrane-bounded organelle;GO:0000785//chromatin;GO:0044464//cell part;GO:0044446//intracellular organelle part;GO:0044427//chromosomal part;GO:0005694//chromosome;GO:0032991//macromolecular complex;GO:0043226//organelle;GO:0032993//protein-DNA complex;GO:0043228//non-membrane-bounded organelle;GO:0044422//organelle…
TraesCS6A02G071100	14.77	16.19	9.41	10.57	10.83	13.32	27.91	30.57	26.92	24.68	22.21	24.82	1.08482	5.94474e-101	0.840496	3.53905e-56	1.28797	2.18233e-131	1.04365	1.52133e-79	1.06611	1.61649e-178			K06689//ubiquitin-conjugating enzyme E2 D [EC:2.3.2.23]+ko04141//Protein processing in endoplasmic reticulum+ko04120//Ubiquitin mediated proteolysis	XP_020177840.1|1.3e-84|ubiquitin-conjugating enzyme E2 28-like [Aegilops tauschii subsp. tauschii]	GO:0043632//modification-dependent macromolecule catabolic process;GO:0044265//cellular macromolecule catabolic process;GO:0044257//cellular protein catabolic process;GO:0008152//metabolic process;GO:1901565//organonitrogen compound catabolic process;GO:0044267//cellular protein metabolic process;GO:0009056//catabolic process;GO:0006807//nitrogen compound metabolic process;GO:0030163//protein cat…
TraesCS3A02G256200	4.41	3.07	3.04	3.18	3.6	2.7	11.04	9.53	7.28	7.39	5.65	6.28	1.40585	7.93215e-133	0.879609	2.58965e-44	1.55083	1.13689e-152	1.02458	2.1435e-56	1.23856	1.63958e-183			K20716//mitogen-activated protein kinase kinase kinase 17/18+ko04016//MAPK signaling pathway - plant	XP_020179605.1|2.0e-214|mitogen-activated protein kinase kinase kinase 3-like [Aegilops tauschii subsp. tauschii]	GO:0016021//integral component of membrane;GO:0031224//intrinsic component of membrane;GO:0016020//membrane;GO:0044425//membrane part;GO:0000166//nucleotide binding;GO:0032553//ribonucleotide binding;GO:0016740//transferase activity;GO:0005524//ATP binding;GO:0097367//carbohydrate derivative binding;GO:0016301//kinase activity;GO:0005488//binding;GO:0004674//protein serine/threonine kinase activi…
TraesCS5B02G116100	3.52	1.46	1.05	2.27	3.61	1.98	5.71	9.42	3.07	6.29	8.44	2.4	1.59883	9.30966e-85	1.51559	8.73442e-74	1.2112	5.20273e-56	1.12796	3.43306e-47	1.3522	1.05928e-126			K14209//solute carrier family 36 (proton-coupled amino acid transporter)	BAK02045.1|1.6e-275|predicted protein [Hordeum vulgare subsp. vulgare]	GO:0071702//organic substance transport;GO:0015849//organic acid transport;GO:0071705//nitrogen compound transport;GO:1903825//organic acid transmembrane transport;GO:0098656//anion transmembrane transport;GO:0003333//amino acid transmembrane transport;GO:0006810//transport;GO:0055085//transmembrane transport;GO:1905039//carboxylic acid transmembrane transport;GO:0015711//organic anion transport;…
TraesCS5A02G403200	42.03	26.49	26.1	20.49	28.31	27.22	80.42	86.35	67.75	57.87	52.07	55.15	1.3111	0	0.806359	0	1.62304	0	1.1183	0	1.22909	0			K01723//hydroperoxide dehydratase [EC:4.2.1.92]+ko00592//alpha-Linolenic acid metabolism+ko01100//Metabolic pathways+ko01110//Biosynthesis of secondary metabolites	XP_003558850.1|2.0e-263|PREDICTED: allene oxide synthase 1, chloroplastic [Brachypodium distachyon]	GO:0042446//hormone biosynthetic process;GO:0032787//monocarboxylic acid metabolic process;GO:1901700//response to oxygen-containing compound;GO:0043436//oxoacid metabolic process;GO:0065007//biological regulation;GO:0019752//carboxylic acid metabolic process;GO:0006082//organic acid metabolic process;GO:1901615//organic hydroxy compound metabolic process;GO:0009695//jasmonic acid biosynthetic pr…
TraesCS7B02G292700	8.4	7.38	6.16	7.46	8.71	10.08	27.96	29.81	16.36	20.04	23.25	20.24	1.75877	0	1.53564	0	1.49894	0	1.27581	0	1.51708	0		pleiotropic drug resistance 12 (best arabidopsis hit); pleiotropic drug resistance protein, putative, expressed (best rice hit)	K05681//ATP-binding cassette, subfamily G (WHITE), member 2+ko02010//ABC transporters;K21396//ATP-binding cassette, subfamily G (WHITE), eye pigment precursor transporter;K16296//serine carboxypeptidase-like clade I [EC:3.4.16.-]	BAJ99663.1|0.0e+00|predicted protein [Hordeum vulgare subsp. vulgare]	GO:0044425//membrane part;GO:0016021//integral component of membrane;GO:0016020//membrane;GO:0005886//plasma membrane;GO:0031224//intrinsic component of membrane;GO:0071944//cell periphery;GO:0005623//cell;GO:0044464//cell part;GO:0043492//ATPase activity, coupled to movement of substances;GO:0030554//adenyl nucleotide binding;GO:0017111//nucleoside-triphosphatase activity;GO:0032555//purine ribo…
TraesCS5D02G342300	5.11	2.45	2.03	2.61	4.01	2.14	10.69	20.19	4.62	5.43	7.76	5.16	1.89368	9.14809e-236	0.943535	2.12731e-43	2.0168	7.59561e-255	1.06666	1.67293e-52	1.5583	7.16694e-271			K13065//shikimate O-hydroxycinnamoyltransferase [EC:2.3.1.133]+ko01100//Metabolic pathways+ko01110//Biosynthesis of secondary metabolites+ko00940//Phenylpropanoid biosynthesis+ko00941//Flavonoid biosynthesis+ko00945//Stilbenoid, diarylheptanoid and gingerol biosynthesis	XP_020168360.1|5.8e-253|putrescine hydroxycinnamoyltransferase 3-like [Aegilops tauschii subsp. tauschii]
TraesCS5B02G356800	1.09	1.05	1.3	0.83	0.81	1.6	1.97	1.5	4.35	5.29	5.07	6.35	1.21351	1.6025e-16	2.31589	1.83586e-80	1.28359	8.04313e-18	2.38597	6.76884e-83	1.89864	3.38835e-91			K19040//E3 ubiquitin-protein ligase ATL10/75/76/77/78 [EC:2.3.2.27];K15706//E3 ubiquitin-protein ligase RNF167 [EC:2.3.2.27];K19040//E3 ubiquitin-protein ligase ATL10/75/76/77/78 [EC:2.3.2.27]	XP_020186561.1|1.4e-96|RING-H2 finger protein ATL80-like [Aegilops tauschii subsp. tauschii]
TraesCS1D02G010800	5.21	6.23	2.16	3.09	7.06	4.52	11.29	14.56	15.77	18.66	16.73	22.8	1.61725	3.01302e-186	2.10496	0	1.49731	7.48474e-166	1.98502	0	1.81916	0			K20718//LRR receptor-like serine/threonine-protein kinase ERECTA [EC:2.7.11.1]+ko04016//MAPK signaling pathway - plant	KQK08129.1|2.2e-144|hypothetical protein BRADI_2g39830 [Brachypodium distachyon]
TraesCS4D02G265100	8.2	3.67	3.32	4.55	8.47	3.47	17.14	23.71	9.07	9.21	10.73	5.38	1.72141	9.97379e-213	0.746721	5.96915e-30	1.59424	5.4532e-190	0.619547	6.60874e-22	1.25314	1.64788e-199			K13412//calcium-dependent protein kinase [EC:2.7.11.1]+ko04626//Plant-pathogen interaction	XP_020154289.1|2.8e-103|cytochrome b561 and DOMON domain-containing protein At5g47530-like [Aegilops tauschii subsp. tauschii]
TraesCS7A02G176400	12.4	10.43	7.1	13.71	25.4	12.36	32.7	42.68	21.54	24.91	24.21	24.03	1.70053	1.35228e-267	1.29937	3.91806e-136	0.906447	6.5294e-101	0.505283	2.07961e-28	1.06595	1.87227e-229			K13172//serine/arginine repetitive matrix protein 2;K14439//SWI/SNF-related matrix-associated actin-dependent regulator of chromatin subfamily A containing DEAD/H box 1 [EC:3.6.4.12]	XP_020173124.1|2.3e-117|nischarin-like [Aegilops tauschii subsp. tauschii]	GO:0031224//intrinsic component of membrane;GO:0016020//membrane;GO:0016021//integral component of membrane;GO:0044425//membrane part;
TraesCS2B02G171200	31.27	20.81	16.31	29.36	45.11	35.68	112.59	120.88	67.15	67.35	72.8	65.83	2.1401	0	1.59553	0	1.44729	0	0.902728	0	1.50908	0			K01904//4-coumarate--CoA ligase [EC:6.2.1.12]+ko00130//Ubiquinone and other terpenoid-quinone biosynthesis+ko01100//Metabolic pathways+ko01110//Biosynthesis of secondary metabolites+ko00940//Phenylpropanoid biosynthesis+ko00360//Phenylalanine metabolism	BAJ85762.1|3.2e-298|predicted protein [Hordeum vulgare subsp. vulgare]	GO:0006725//cellular aromatic compound metabolic process;GO:0009698//phenylpropanoid metabolic process;GO:0044237//cellular metabolic process;GO:0009987//cellular process;GO:0071704//organic substance metabolic process;GO:1901360//organic cyclic compound metabolic process;GO:0019748//secondary metabolic process;GO:0008152//metabolic process;GO:0016405//CoA-ligase activity;GO:0043168//anion bindin…
BGI_novel_G011366	1.58	2.05	1.31	2.91	1.33	2.79	9.39	7.16	11.84	11.65	9.15	14.26	2.52396	4.24076e-55	2.84685	3.77502e-77	1.98763	2.0816e-41	2.31052	2.70362e-61	2.40172	2.42363e-114
TraesCS5B02G468300	41.29	23.75	19.89	33.81	54.05	45.93	164.61	229.46	111.71	77.66	95.45	75.49	2.57754	0	1.55384	0	1.91806	0	0.894356	0	1.7922	0			K10775//phenylalanine ammonia-lyase [EC:4.3.1.24]+ko01100//Metabolic pathways+ko01110//Biosynthesis of secondary metabolites+ko00940//Phenylpropanoid biosynthesis+ko00360//Phenylalanine metabolism	XP_020181748.1|0.0e+00|phenylalanine ammonia-lyase-like [Aegilops tauschii subsp. tauschii]	GO:0046394//carboxylic acid biosynthetic process;GO:0044282//small molecule catabolic process;GO:0019438//aromatic compound biosynthetic process;GO:0044249//cellular biosynthetic process;GO:1901575//organic substance catabolic process;GO:0009987//cellular process;GO:0006520//cellular amino acid metabolic process;GO:1902221//erythrose 4-phosphate/phosphoenolpyruvate family amino acid metabolic pro…
TraesCS1D02G123400	157.49	114.02	111.71	82.67	112.36	99.16	271.82	328.74	230.5	188.01	242.47	158.37	1.11847	0	0.62054	0	1.49992	0	1.00199	0	1.06969	0			K00029//malate dehydrogenase (oxaloacetate-decarboxylating)(NADP+) [EC:1.1.1.40]+ko01100//Metabolic pathways+ko00710//Carbon fixation in photosynthetic organisms+ko00620//Pyruvate metabolism+ko01200//Carbon metabolism;K00029//malate dehydrogenase (oxaloacetate-decarboxylating)(NADP+) [EC:1.1.1.40]+ko01100//Metabolic pathways+ko00710//Carbon fixation in photosynthetic organisms+ko00620//Pyruvate m…	XP_004960887.1|6.7e-303|PREDICTED: NADP-dependent malic enzyme, chloroplastic [Setaria italica]	GO:0043648//dicarboxylic acid metabolic process;GO:0009987//cellular process;GO:0071704//organic substance metabolic process;GO:0006082//organic acid metabolic process;GO:0006090//pyruvate metabolic process;GO:0019752//carboxylic acid metabolic process;GO:0008152//metabolic process;GO:0043436//oxoacid metabolic process;GO:0006108//malate metabolic process;GO:0044237//cellular metabolic process;GO…
TraesCS7B02G488200	0.77	1.35	1.39	1.06	1.48	1.89	2.45	1.14	5.05	2.07	2.88	4.24	1.29691	1.79548e-08	1.4063	5.539e-10	0.93693	1.56607e-05	1.04632	9.56501e-07	1.16196	1.13507e-13				EMS47007.1|6.4e-76|hypothetical protein TRIUR3_23280 [Triticum urartu]	GO:0005622//intracellular;GO:0043226//organelle;GO:0044464//cell part;GO:0005737//cytoplasm;GO:0005739//mitochondrion;GO:0044424//intracellular part;GO:0005623//cell;GO:0043231//intracellular membrane-bounded organelle;GO:0043227//membrane-bounded organelle;GO:0043229//intracellular organelle;GO:0044444//cytoplasmic part;
TraesCS7A02G184600	53.92	36.54	47.28	32.23	40.92	38.08	117.51	148.02	93.44	77.21	72.8	78.99	1.38393	0	0.737748	1.62199e-284	1.68658	0	1.0404	0	1.24141	0			K00891//shikimate kinase [EC:2.7.1.71]+ko01230//Biosynthesis of amino acids+ko01100//Metabolic pathways+ko01110//Biosynthesis of secondary metabolites+ko00400//Phenylalanine, tyrosine and tryptophan biosynthesis	XP_020198259.1|4.9e-152|shikimate kinase 2, chloroplastic-like [Aegilops tauschii subsp. tauschii]	GO:0071704//organic substance metabolic process;GO:0006725//cellular aromatic compound metabolic process;GO:0043648//dicarboxylic acid metabolic process;GO:1901615//organic hydroxy compound metabolic process;GO:0043650//dicarboxylic acid biosynthetic process;GO:0006082//organic acid metabolic process;GO:0046417//chorismate metabolic process;GO:0044237//cellular metabolic process;GO:0009072//aroma…
TraesCS6A02G240900	5.75	1.3	1.16	3.38	7.6	1.8	9.19	28.37	3.63	3.14	8.91	1.06	2.3282	0	0.704029	2.22021e-29	1.68079	0	0.0566233	0.312438	1.37998	0			K15363//fanconi-associated nuclease 1 [EC:3.1.21.- 3.1.4.1];K01807//ribose 5-phosphate isomerase A [EC:5.3.1.6]+ko00030//Pentose phosphate pathway+ko01230//Biosynthesis of amino acids+ko01100//Metabolic pathways+ko01110//Biosynthesis of secondary metabolites+ko00710//Carbon fixation in photosynthetic organisms+ko01200//Carbon metabolism;K03687//molecular chaperone GrpE;K15363//fanconi-associated …	XP_020184211.1|0.0e+00|iron-phytosiderophore transporter YSL15-like [Aegilops tauschii subsp. tauschii]
TraesCS5A02G306900	19.69	13.2	15.36	15.17	18.83	16.73	23.36	28.29	18.38	47.35	61.75	33.36	0.534717	6.38014e-73	1.56408	0	0.459263	2.08933e-55	1.48863	0	1.09815	0			K13535//cardiolipin-specific phospholipase [EC:3.1.1.-]+ko00564//Glycerophospholipid metabolism;K13698//abhydrolase domain-containing protein 4;K13535//cardiolipin-specific phospholipase [EC:3.1.1.-]+ko00564//Glycerophospholipid metabolism;K13698//abhydrolase domain-containing protein 4	XP_020194711.1|2.1e-236|probable 1-acylglycerol-3-phosphate O-acyltransferase [Aegilops tauschii subsp. tauschii]	GO:0044237//cellular metabolic process;GO:0044238//primary metabolic process;GO:0071704//organic substance metabolic process;GO:0048878//chemical homeostasis;GO:0009058//biosynthetic process;GO:0050801//ion homeostasis;GO:0055091//phospholipid homeostasis;GO:0055089//fatty acid homeostasis;GO:0090407//organophosphate biosynthetic process;GO:0055090//acylglycerol homeostasis;GO:0065008//regulation…
TraesCS7A02G391000	30.08	19.01	15.13	18.9	31.43	29.72	85.67	105.82	59.99	42.54	51.91	37.24	1.97216	0	1.03969	0	1.65239	0	0.719921	0	1.41487	0		Hordeum vulgare subsp. vulgare mRNA for predicted protein, complete cds, clone: NIASHv2100P20	K05681//ATP-binding cassette, subfamily G (WHITE), member 2+ko02010//ABC transporters	XP_020186107.1|0.0e+00|ABC transporter G family member 44-like [Aegilops tauschii subsp. tauschii]
TraesCS7B02G150000	12.98	13.14	10.53	13.35	17.5	16.69	33.68	35.74	28.46	25.03	21.43	28.35	1.41995	0	1.03462	1.60734e-157	1.0375	2.46386e-206	0.652168	3.53426e-72	1.03837	0		RING/U-box superfamily protein (best arabidopsis hit)	K19041//E3 ubiquitin-protein ligase RNF38/44 [EC:2.3.2.27];K00430//peroxidase [EC:1.11.1.7]+ko01100//Metabolic pathways+ko01110//Biosynthesis of secondary metabolites+ko00940//Phenylpropanoid biosynthesis	XP_020146501.1|7.3e-158|RING-H2 finger protein ATL16-like [Aegilops tauschii subsp. tauschii]	GO:0016021//integral component of membrane;GO:0044425//membrane part;GO:0031224//intrinsic component of membrane;GO:0016020//membrane;
TraesCS7B02G252400	8.93	3.4	3.35	1.95	5.93	2.61	16.18	22.47	10.99	9.21	11.38	5.7	1.66701	1.71846e-170	0.755757	6.48151e-27	2.23906	4.58976e-250	1.3278	3.49462e-65	1.54146	1.25228e-231			K13171//serine/arginine repetitive matrix protein 1+ko03015//mRNA surveillance pathway+ko03013//RNA transport;K13412//calcium-dependent protein kinase [EC:2.7.11.1]+ko04626//Plant-pathogen interaction;K13172//serine/arginine repetitive matrix protein 2	XP_020157406.1|2.5e-124|uncharacterized protein LOC109742718 [Aegilops tauschii subsp. tauschii]
TraesCS2B02G349300	2.2	1.56	1.73	1.5	3.8	3.38	10.26	13.75	6.46	1.87	1.73	1.75	2.4784	6.80616e-92	-0.0233203	0.901614	1.80168	9.9031e-62	-0.700034	3.14679e-05	1.34326	6.48369e-48			K10523//speckle-type POZ protein;K19307//25S rRNA (uracil2634-N3)-methyltransferase [EC:2.1.1.313];K04733//interleukin-1 receptor-associated kinase 4 [EC:2.7.11.1]	XP_020149035.1|9.7e-54|heavy metal-associated isoprenylated plant protein 47-like [Aegilops tauschii subsp. tauschii]
TraesCS4B02G343100	7.94	2.85	2.15	0.66	1.23	0.5	10.49	16.3	5.84	0.04	0.39	0.01	1.33777	1.43288e-148	-4.86638	1.93214e-226	3.76977	0	-2.43437	7.09384e-26	1.11608	1.00308e-113			K04730//interleukin-1 receptor-associated kinase 1 [EC:2.7.11.1];K04733//interleukin-1 receptor-associated kinase 4 [EC:2.7.11.1]	XP_020199513.1|1.1e-159|putative receptor-like protein kinase At4g00960 [Aegilops tauschii subsp. tauschii]
TraesCS5A02G268200	2.27	2.28	3.35	1.58	1.79	2.97	11.58	2.74	11.9	2.79	2.1	3.28	1.72885	1.4905e-145	0.0486444	0.590179	2.04321	6.17269e-181	0.363012	0.000146531	1.27333	2.22693e-121			K09753//cinnamoyl-CoA reductase [EC:1.2.1.44]+ko01100//Metabolic pathways+ko01110//Biosynthesis of secondary metabolites+ko00940//Phenylpropanoid biosynthesis	EMS56505.1|1.4e-195|Bifunctional dihydroflavonol 4-reductase/flavanone 4-reductase [Triticum urartu]	GO:0005488//binding;GO:0050662//coenzyme binding;GO:0048037//cofactor binding;GO:0003824//catalytic activity;
TraesCS7A02G041100	2.57	1.23	0.78	3.43	6.39	1.63	5.46	8.75	2.51	7.49	10.78	5.11	1.87519	3.94848e-93	2.3619	4.28937e-172	0.543672	8.82996e-14	1.03039	4.8906e-53	1.32621	1.5261e-133			K13172//serine/arginine repetitive matrix protein 2;K22020//mucin-19	XP_020193403.1|2.3e-157|uncharacterized protein LOC109779205 [Aegilops tauschii subsp. tauschii]
TraesCS7B02G338200	5.74	3.66	3.13	2.99	5	3.99	22.69	30.8	24.37	2.43	4.3	1.68	2.63807	0	-0.564423	6.1526e-08	2.69289	0	-0.509606	1.36155e-06	1.82119	5.53856e-300			K07213//copper chaperone	OSX78207.1|1.7e-07|hypothetical protein BU14_0116s0027 [Porphyra umbilicalis]
TraesCS2B02G060500	11.12	15.75	10.76	16.34	13.69	11.35	42.07	33.34	52.56	31.23	28.84	41.08	1.76687	7.48856e-291	1.43569	5.03587e-171	1.61574	2.44179e-255	1.28456	6.61542e-144	1.53462	0				EMT02018.1|2.8e-36|hypothetical protein F775_04818 [Aegilops tauschii]
TraesCS6A02G122100	1.57	1.56	0.94	2.11	3.23	5.09	10.75	11.73	8.04	7.29	5.75	8.16	2.74017	0	2.37024	0	1.43566	3.6808e-241	1.06573	3.15989e-117	1.77617	0			K01179//endoglucanase [EC:3.2.1.4]+ko01100//Metabolic pathways+ko00500//Starch and sucrose metabolism;K01179//endoglucanase [EC:3.2.1.4]+ko01100//Metabolic pathways+ko00500//Starch and sucrose metabolism;K01179//endoglucanase [EC:3.2.1.4]+ko01100//Metabolic pathways+ko00500//Starch and sucrose metabolism;K01179//endoglucanase [EC:3.2.1.4]+ko01100//Metabolic pathways+ko00500//Starch and sucrose me…	XP_020157296.1|4.4e-310|endoglucanase 5-like [Aegilops tauschii subsp. tauschii]	GO:0044275//cellular carbohydrate catabolic process;GO:0044237//cellular metabolic process;GO:0044260//cellular macromolecule metabolic process;GO:0030243//cellulose metabolic process;GO:0009057//macromolecule catabolic process;GO:0005976//polysaccharide metabolic process;GO:0043170//macromolecule metabolic process;GO:0008152//metabolic process;GO:0009251//glucan catabolic process;GO:0009987//cel…
TraesCS2D02G089000	2.51	1.07	1.01	2.06	4.68	2.43	3.85	5.58	2.87	7.33	6.88	2.96	1.42742	4.37298e-47	1.91442	1.36873e-97	0.420139	4.68778e-07	0.90714	3.8965e-32	1.10233	6.57299e-74			K09841//xanthoxin dehydrogenase [EC:1.1.1.288]+ko00906//Carotenoid biosynthesis+ko01100//Metabolic pathways+ko01110//Biosynthesis of secondary metabolites	XP_020159987.1|1.4e-183|sex determination protein tasselseed-2-like [Aegilops tauschii subsp. tauschii]
TraesCS4D02G300500	5.68	3.65	4.16	3.59	4.53	3.16	24.51	27.27	21.67	2.89	5.03	3.68	2.446	0	-0.21209	0.00353608	2.69912	0	0.0410328	0.590029	1.7852	0			K13065//shikimate O-hydroxycinnamoyltransferase [EC:2.3.1.133]+ko01100//Metabolic pathways+ko01110//Biosynthesis of secondary metabolites+ko00940//Phenylpropanoid biosynthesis+ko00941//Flavonoid biosynthesis+ko00945//Stilbenoid, diarylheptanoid and gingerol biosynthesis	XP_020199384.1|1.3e-262|tryptamine benzoyltransferase 1-like [Aegilops tauschii subsp. tauschii]
TraesCS7A02G089600	12.36	6.7	6.45	5.09	7.92	6.71	86.69	105.49	43.24	31.07	49.1	22.43	3.14211	0	2.02998	0	3.4403	0	2.32817	0	2.8347	0			K01674//carbonic anhydrase [EC:4.2.1.1]+ko00910//Nitrogen metabolism;K01674//carbonic anhydrase [EC:4.2.1.1]+ko00910//Nitrogen metabolism;K01674//carbonic anhydrase [EC:4.2.1.1]+ko00910//Nitrogen metabolism	XP_020170325.1|9.1e-154|alpha carbonic anhydrase 7-like [Aegilops tauschii subsp. tauschii]
TraesCS2A02G218700	1.57	0.8	1.14	1.03	1.54	1.3	12.14	10.19	8.76	2.98	3.48	3.41	3.14371	6.39719e-209	1.49312	5.23025e-28	2.99952	4.41198e-199	1.34893	3.7333e-24	2.47377	1.32607e-214			K00799//glutathione S-transferase [EC:2.5.1.18]+ko00480//Glutathione metabolism	XP_020162377.1|4.0e-129|probable glutathione S-transferase GSTU6 [Aegilops tauschii subsp. tauschii]	GO:0016740//transferase activity;GO:0003824//catalytic activity;
TraesCS2B02G551800	1.24	1.8	0.93	1.98	1.73	3.09	7.08	7.97	10.18	24.01	20.9	33.52	2.66727	3.8385e-100	4.31208	0	1.87839	1.24409e-65	3.5232	0	3.26181	0				XP_020182976.1|6.1e-55|uncharacterized protein LOC109768636 [Aegilops tauschii subsp. tauschii]
TraesCS7D02G536900	5.87	1.94	1.84	3.63	4.81	1.59	22.59	29.23	9.22	11.41	18.3	5.83	2.66628	0	1.88996	3.43842e-202	2.60174	0	1.82542	4.66938e-192	2.29964	0			K06901//putative MFS transporter, AGZA family, xanthine/uracil permease;K05278//flavonol synthase [EC:1.14.11.23]+ko01100//Metabolic pathways+ko01110//Biosynthesis of secondary metabolites+ko00941//Flavonoid biosynthesis	XP_020159780.1|4.2e-183|2-oxoglutarate-Fe(II) type oxidoreductase-like [Aegilops tauschii subsp. tauschii]	GO:0005488//binding;GO:0043169//cation binding;GO:0046872//metal ion binding;GO:0043167//ion binding;GO:0016491//oxidoreductase activity;GO:0003824//catalytic activity;
TraesCS2A02G161000	3.1	3.13	2.91	2.05	2.65	2.76	11.81	18.9	7.39	6.52	4.83	5.1	2.06376	3.62383e-231	0.856068	1.30151e-27	2.34676	2.4838e-269	1.13906	4.32253e-43	1.72027	3.17712e-258			K01087//trehalose 6-phosphate phosphatase [EC:3.1.3.12]+ko01100//Metabolic pathways+ko00500//Starch and sucrose metabolism;K01087//trehalose 6-phosphate phosphatase [EC:3.1.3.12]+ko01100//Metabolic pathways+ko00500//Starch and sucrose metabolism	XP_020197684.1|3.3e-193|probable trehalose-phosphate phosphatase 3 [Aegilops tauschii subsp. tauschii]
TraesCS3A02G218000	53.49	29.59	33.51	41.03	51.14	39.81	107.24	157.59	69.21	58.26	72.32	46.86	1.50216	0	0.586255	0	1.33129	0	0.415388	3.08656e-242	1.03095	0		Hordeum vulgare subsp. vulgare mRNA for predicted protein, partial cds, clone: NIASHv2129I14	K05681//ATP-binding cassette, subfamily G (WHITE), member 2+ko02010//ABC transporters;K05681//ATP-binding cassette, subfamily G (WHITE), member 2+ko02010//ABC transporters;K05681//ATP-binding cassette, subfamily G (WHITE), member 2+ko02010//ABC transporters;K05681//ATP-binding cassette, subfamily G (WHITE), member 2+ko02010//ABC transporters;K05681//ATP-binding cassette, subfamily G (WHITE), memb…	XP_015648329.1|0.0e+00|PREDICTED: ABC transporter G family member 37 isoform X1 [Oryza sativa Japonica Group]	GO:0051234//establishment of localization;GO:0051179//localization;GO:0006810//transport;GO:0044464//cell part;GO:0016021//integral component of membrane;GO:0031224//intrinsic component of membrane;GO:0071944//cell periphery;GO:0005623//cell;GO:0044425//membrane part;GO:0016020//membrane;GO:0005886//plasma membrane;GO:0016787//hydrolase activity;GO:0016818//hydrolase activity, acting on acid anhy…
TraesCS5D02G544300	3.61	2.79	3.34	3.33	3.18	3.53	9.01	10.47	6.63	5.37	5.03	6.78	1.42406	0	0.817722	3.67415e-107	1.3806	0	0.774265	3.0362e-97	1.13261	0		NB-ARC domain-containing disease resistance protein (best arabidopsis hit); NBS-LRR disease resistance protein, putative, expressed (best rice hit)	K15078//structure-specific endonuclease subunit SLX1 [EC:3.6.1.-];K15078//structure-specific endonuclease subunit SLX1 [EC:3.6.1.-];K15078//structure-specific endonuclease subunit SLX1 [EC:3.6.1.-];K15078//structure-specific endonuclease subunit SLX1 [EC:3.6.1.-];K15078//structure-specific endonuclease subunit SLX1 [EC:3.6.1.-]	XP_020154167.1|0.0e+00|putative disease resistance protein RGA4 isoform X3 [Aegilops tauschii subsp. tauschii]
TraesCS5A02G286900	7.4	1.12	1.19	3.97	14.66	4.9	11.85	21.88	5.72	10.88	24.28	4.34	2.02816	0	2.03509	0	0.745145	2.61789e-76	0.752068	2.0944e-77	1.25481	0			K00423//L-ascorbate oxidase [EC:1.10.3.3]+ko01100//Metabolic pathways+ko00053//Ascorbate and aldarate metabolism	XP_020178180.1|0.0e+00|L-ascorbate oxidase-like [Aegilops tauschii subsp. tauschii]
BGI_novel_G002595	1.81	1.65	1.26	1.38	2.34	1.14	6.99	9.51	5.07	4.22	2.96	4.12	2.19436	6.12165e-291	1.25934	2.21966e-70	2.14908	3.5515e-282	1.21406	3.09563e-66	1.78145	0			K13415//protein brassinosteroid insensitive 1 [EC:2.7.10.1 2.7.11.1]+ko04075//Plant hormone signal transduction
TraesCS5D02G448500	4.38	1.05	1.93	2.16	6.88	2.24	8.89	14.88	5.59	10.21	15.27	3.2	1.999	2.43107e-209	1.97043	3.08687e-200	1.37638	2.12603e-123	1.34781	1.52179e-116	1.6417	0			K13222//indole-3-glycerol-phosphate lyase [EC:4.1.2.8]+ko00402//Benzoxazinoid biosynthesis+ko01100//Metabolic pathways	XP_020172905.1|1.7e-180|tryptophan synthase alpha chain-like [Aegilops tauschii subsp. tauschii]	GO:0016829//lyase activity;GO:0004834//tryptophan synthase activity;GO:0016835//carbon-oxygen lyase activity;GO:0003824//catalytic activity;GO:0016836//hydro-lyase activity;
TraesCS5A02G205300	2.18	2.39	1.46	1.83	1.87	2.2	5.89	3.12	6.72	4.83	3.98	4.7	1.38907	7.57384e-09	1.20268	1.37671e-06	1.37532	1.0629e-08	1.18894	1.8152e-06	1.29262	7.74436e-14				BAJ99194.1|4.2e-30|predicted protein [Hordeum vulgare subsp. vulgare]
TraesCS2A02G152400	28.56	14.15	12.53	22.42	40.33	23.19	72.6	99.57	41.18	43.8	57.22	21.07	2.01618	0	1.20318	0	1.34586	0	0.53286	9.32825e-122	1.29653	0			K20660//cytochrome P450 family 709;K20660//cytochrome P450 family 709;K20660//cytochrome P450 family 709	XP_020184145.1|8.3e-285|cytochrome P450 709B1-like [Aegilops tauschii subsp. tauschii]
TraesCS4B02G302200	12.78	7.28	8.65	5.69	7.67	5.45	28.12	30.28	24.83	9.43	10.88	10.43	1.53687	0	0.102727	0.0272673	2.14127	0	0.707126	1.95201e-42	1.26466	0			K13065//shikimate O-hydroxycinnamoyltransferase [EC:2.3.1.133]+ko01100//Metabolic pathways+ko01110//Biosynthesis of secondary metabolites+ko00940//Phenylpropanoid biosynthesis+ko00941//Flavonoid biosynthesis+ko00945//Stilbenoid, diarylheptanoid and gingerol biosynthesis	XP_020199384.1|3.4e-250|tryptamine benzoyltransferase 1-like [Aegilops tauschii subsp. tauschii]
TraesCS1A02G314900	5.16	4.95	3.08	4.59	12.53	6.18	8.6	8.46	9.24	35.03	35.24	16.79	1.00209	1.45048e-33	2.73649	0	0.169275	0.0187463	1.90368	1.9648e-277	1.63693	4.02346e-293			K22139//mitochondrial pyruvate carrier 2;K13171//serine/arginine repetitive matrix protein 1+ko03015//mRNA surveillance pathway+ko03013//RNA transport;K14325//RNA-binding protein with serine-rich domain 1+ko03015//mRNA surveillance pathway+ko03013//RNA transport;K13172//serine/arginine repetitive matrix protein 2;K22139//mitochondrial pyruvate carrier 2;K13171//serine/arginine repetitive matrix p…	XP_020182800.1|2.1e-96|high molecular mass early light-inducible protein HV58, chloroplastic-like [Aegilops tauschii subsp. tauschii]
TraesCS2A02G209700	2.03	2.04	1.51	2.15	2.57	2.84	10.83	10.35	7.16	3.87	3.17	4.68	2.35099	2.96149e-139	1.07888	3.01141e-20	1.90054	2.4104e-106	0.628425	6.97499e-09	1.61293	1.22578e-119				OEL33481.1|1.3e-31|hypothetical protein BAE44_0005498 [Dichanthelium oligosanthes]
TraesCS2A02G476700	17.72	17.76	15.74	15.12	26.47	28.15	51.03	54.52	40.28	40.13	44.43	31.26	1.51468	0	1.1891	1.81349e-186	1.05755	1.18614e-193	0.731969	1.72975e-83	1.11656	0				XP_020161190.1|9.3e-82|pathogenesis-related protein 1-like [Aegilops tauschii subsp. tauschii]
TraesCS4D02G221100	34.74	26.91	22.88	27.74	35.93	32.75	98.38	105.57	48.17	41.88	50.74	36.49	1.58143	0	0.617215	1.05893e-149	1.38594	0	0.421729	2.09582e-75	1.08077	0			K01736//chorismate synthase [EC:4.2.3.5]+ko01230//Biosynthesis of amino acids+ko01100//Metabolic pathways+ko01110//Biosynthesis of secondary metabolites+ko00400//Phenylalanine, tyrosine and tryptophan biosynthesis	XP_020180931.1|9.4e-254|chorismate synthase 2, chloroplastic [Aegilops tauschii subsp. tauschii]	GO:0044238//primary metabolic process;GO:0006725//cellular aromatic compound metabolic process;GO:0006082//organic acid metabolic process;GO:0019752//carboxylic acid metabolic process;GO:0009073//aromatic amino acid family biosynthetic process;GO:0046417//chorismate metabolic process;GO:0008652//cellular amino acid biosynthetic process;GO:1901360//organic cyclic compound metabolic process;GO:0008…
TraesCS4A02G412900	4.53	2.48	2.42	4.29	9.8	28.65	77.49	37.81	64.62	59.89	44.79	36.79	4.25534	0	3.92903	0	2.04392	5.34163e-282	1.7176	1.58987e-177	2.61338	0			K11855//ubiquitin carboxyl-terminal hydrolase 36/42 [EC:3.4.19.12]	EMS63332.1|3.0e-76|Cortical cell-delineating protein [Triticum urartu]
TraesCS7B02G152000	28.18	27.53	22.7	26.75	33.26	33.45	64.05	55.62	69.65	55.48	51.25	54.33	1.27259	0	1.04347	0	1.01347	0	0.784355	4.87339e-268	1.02854	0			K13412//calcium-dependent protein kinase [EC:2.7.11.1]+ko04626//Plant-pathogen interaction;K14325//RNA-binding protein with serine-rich domain 1+ko03015//mRNA surveillance pathway+ko03013//RNA transport;K13171//serine/arginine repetitive matrix protein 1+ko03015//mRNA surveillance pathway+ko03013//RNA transport	XP_020201631.1|1.1e-214|cytochrome b561 and DOMON domain-containing protein At4g12980-like [Aegilops tauschii subsp. tauschii]	GO:0008152//metabolic process;GO:0055114//oxidation-reduction process;GO:0016020//membrane;GO:0044425//membrane part;GO:0031224//intrinsic component of membrane;GO:0016021//integral component of membrane;
TraesCSU02G262200	5.43	1.97	1.58	2.53	7.74	3.4	25.02	35.51	13.64	10.71	14.31	4.58	3.05454	1.73081e-240	1.73945	1.17648e-50	2.43045	1.42643e-188	1.11536	1.42931e-26	2.20174	8.65326e-235			K03006//DNA-directed RNA polymerase II subunit RPB1 [EC:2.7.7.6]+ko03020//RNA polymerase	XP_020148562.1|5.1e-86|mavicyanin-like [Aegilops tauschii subsp. tauschii]
TraesCS7D02G544300	0.05	0.08	0.06	2.74	3.25	3.53	3.27	3.57	2.59	3.59	4.03	3.68	5.60327	0	5.86415	0	-0.0125814	0.798494	0.248305	1.47985e-07	1.10042	7.02457e-164		Triticum aestivum cDNA, clone: WT013_L19, cultivar: Chinese Spring	K15078//structure-specific endonuclease subunit SLX1 [EC:3.6.1.-]	EMT23296.1|0.0e+00|Putative disease resistance protein RGA3 [Aegilops tauschii]
BGI_novel_G004994	15.01	7.4	8.08	2.58	2.4	4.87	23.89	20.64	25.14	34.18	26.37	34.43	1.19478	3.05521e-87	1.65129	1.41612e-191	2.81009	4.36474e-270	3.26661	0	2.02859	0					GO:0016020//membrane;GO:0019012//virion;GO:0016021//integral component of membrane;GO:0044423//virion part;GO:0044425//membrane part;GO:0031224//intrinsic component of membrane;GO:0019028//viral capsid;
TraesCS3D02G451400	0.83	0.45	0.61	1.55	2.03	0.97	2.42	4.18	1.07	2.24	3.81	1.21	2.0195	7.84454e-45	1.94463	1.97281e-40	0.752962	7.62254e-11	0.678093	8.06335e-09	1.21762	7.58361e-42			K13420//LRR receptor-like serine/threonine-protein kinase FLS2 [EC:2.7.11.1]+ko04016//MAPK signaling pathway - plant+ko04626//Plant-pathogen interaction	XP_020182501.1|1.4e-198|receptor-like protein 12 [Aegilops tauschii subsp. tauschii]
TraesCS2B02G181000	3.09	0.72	0.88	0.48	1.21	0.08	4.41	11.18	5.21	1.06	3.3	0.9	2.16347	1.55084e-31	0.193375	0.459335	3.54827	4.17792e-51	1.57818	2.14791e-06	2.02603	4.37273e-36				EMT28811.1|1.9e-47|hypothetical protein F775_07959 [Aegilops tauschii]
TraesCS6A02G241000	4.53	3.29	3.86	5.35	5.89	4.99	12.24	15.84	8.61	7.79	6.92	7.51	1.65327	9.45709e-268	0.930039	5.08073e-67	1.17539	8.54429e-160	0.452159	8.04834e-20	1.08124	1.11668e-223			K00924//kinase [EC:2.7.1.-]	XP_020184210.1|1.9e-256|probable serine/threonine-protein kinase PBL19 [Aegilops tauschii subsp. tauschii]	GO:0007154//cell communication;GO:0044237//cellular metabolic process;GO:0050789//regulation of biological process;GO:0065007//biological regulation;GO:0006464//cellular protein modification process;GO:0007166//cell surface receptor signaling pathway;GO:0006807//nitrogen compound metabolic process;GO:0007165//signal transduction;GO:0016310//phosphorylation;GO:0008152//metabolic process;GO:0050896…
TraesCS3B02G076900	1.94	1.12	1.37	1.57	2.39	1.08	5.5	8.77	3.22	2.22	3.05	0.86	1.98438	1.0171e-147	0.476158	1.86514e-06	1.79525	9.78991e-129	0.287028	0.00305224	1.32615	3.20331e-112		Hordeum vulgare subsp. vulgare mRNA for predicted protein, complete cds, clone: NIASHv2094G16	K04733//interleukin-1 receptor-associated kinase 4 [EC:2.7.11.1]	CDM81285.1|0.0e+00|unnamed protein product [Triticum aestivum]
TraesCS6D02G291800	9.99	6.81	4.22	9.38	18.06	8.97	28.56	39.12	19.63	13.87	14.22	10.19	1.9985	0	0.922393	7.50947e-146	1.14935	0	0.0732444	0.0182679	1.07759	0			K01179//endoglucanase [EC:3.2.1.4]+ko01100//Metabolic pathways+ko00500//Starch and sucrose metabolism;K01179//endoglucanase [EC:3.2.1.4]+ko01100//Metabolic pathways+ko00500//Starch and sucrose metabolism;K01179//endoglucanase [EC:3.2.1.4]+ko01100//Metabolic pathways+ko00500//Starch and sucrose metabolism;K01179//endoglucanase [EC:3.2.1.4]+ko01100//Metabolic pathways+ko00500//Starch and sucrose me…	XP_020159018.1|0.0e+00|endoglucanase 7-like [Aegilops tauschii subsp. tauschii]	GO:0009057//macromolecule catabolic process;GO:0005975//carbohydrate metabolic process;GO:0009056//catabolic process;GO:0016052//carbohydrate catabolic process;GO:0000272//polysaccharide catabolic process;GO:0044262//cellular carbohydrate metabolic process;GO:0071704//organic substance metabolic process;GO:0044238//primary metabolic process;GO:0044260//cellular macromolecule metabolic process;GO:…
TraesCS1B02G451200	2.05	3.05	1.26	1.18	2.4	2.04	6.95	19.87	10.51	7.06	5.59	3.56	2.55938	5.6725e-152	1.36438	7.88948e-30	2.72422	1.04756e-161	1.52922	6.45898e-35	2.16547	2.836e-178			K08914//light-harvesting complex II chlorophyll a/b binding protein 3+ko01100//Metabolic pathways+ko00196//Photosynthesis - antenna proteins	P27523.1|6.2e-130|RecName: Full=Chlorophyll a-b binding protein of LHCII type III, chloroplastic; Short=CAB; Flags: Precursor	GO:1901564//organonitrogen compound metabolic process;GO:0071704//organic substance metabolic process;GO:0043170//macromolecule metabolic process;GO:0050896//response to stimulus;GO:0019684//photosynthesis, light reaction;GO:0009768//photosynthesis, light harvesting in photosystem I;GO:0044238//primary metabolic process;GO:0009765//photosynthesis, light harvesting;GO:0018298//protein-chromophore …
TraesCS7A02G030400	0.29	0.09	0.32	4.3	2.88	3.88	5.62	5.24	6.58	3.23	3.59	4.17	4.65101	6.54058e-272	3.98859	7.69717e-159	0.651083	7.55491e-23	-0.0113401	0.878931	1.27823	1.17359e-108			K20473//neuroblastoma-amplified sequence	XP_020163829.1|9.5e-227|uncharacterized protein LOC109749274 [Aegilops tauschii subsp. tauschii]	GO:0016020//membrane;GO:0004871//signal transducer activity;
TraesCS7B02G084800	2.96	1.92	0.96	1.54	3.99	2.94	6.16	10.81	3.73	4.38	5.72	1.83	1.83978	1.28173e-17	1.06563	1.59795e-05	1.26125	1.04437e-10	0.487098	0.0296329	1.1897	7.80395e-15				EMT28254.1|2.6e-17|hypothetical protein F775_06906 [Aegilops tauschii]
TraesCS4D02G228500	5.06	4.73	3.03	3.25	6.43	4.87	4.73	6.74	3.83	15.44	13.99	12.13	0.259877	0.000132782	1.70479	4.50474e-226	0.0692168	0.293981	1.51413	6.19715e-190	1.05388	2.06547e-148			K00430//peroxidase [EC:1.11.1.7]+ko01100//Metabolic pathways+ko01110//Biosynthesis of secondary metabolites+ko00940//Phenylpropanoid biosynthesis;K05747//Wiskott-Aldrich syndrome protein+ko04144//Endocytosis	XP_020154888.1|1.6e-138|vegetative cell wall protein gp1-like [Aegilops tauschii subsp. tauschii]
TraesCS6A02G270200	10.81	7.24	7.72	10.43	14.96	9.39	21.64	22.21	15.81	20.07	21.66	20.57	1.21466	9.08709e-98	1.28291	1.0229e-110	0.770601	1.17369e-46	0.838848	6.87809e-56	1.01097	4.99426e-147			K00939//adenylate kinase [EC:2.7.4.3]+ko00230//Purine metabolism+ko01100//Metabolic pathways+ko01110//Biosynthesis of secondary metabolites+ko00730//Thiamine metabolism	XP_020196264.1|8.2e-75|trihelix transcription factor GT-3b-like [Aegilops tauschii subsp. tauschii]
TraesCS7D02G204600	22.9	11.8	10.11	9.8	18.81	9.7	45.58	54.92	33.01	26.04	24.21	27.68	1.58006	1.0451e-288	0.809371	3.38798e-59	1.79324	0	1.02255	1.88885e-86	1.35011	0	Tify		K13464//jasmonate ZIM domain-containing protein+ko04075//Plant hormone signal transduction	EMT33399.1|2.9e-79|hypothetical protein F775_52422 [Aegilops tauschii]
TraesCS1D02G080600	4.96	1.05	0.61	2.64	5.72	1.55	14.39	18.24	5.65	3.91	11.61	2.23	2.54024	2.58306e-295	1.43732	1.19097e-65	1.94778	8.85367e-213	0.844854	1.00765e-28	1.76999	1.06464e-273			K00430//peroxidase [EC:1.11.1.7]+ko01100//Metabolic pathways+ko01110//Biosynthesis of secondary metabolites+ko00940//Phenylpropanoid biosynthesis	XP_020179031.1|1.3e-194|peroxidase 5-like [Aegilops tauschii subsp. tauschii]
BGI_novel_G009740	0.73	0.78	0.42	1.7	1.96	2.18	4.24	2.73	1.95	2.91	2.39	2.23	2.21427	1.61925e-46	1.97495	2.54936e-34	0.605122	2.4709e-07	0.365806	0.00285281	1.08563	5.50632e-31			K03006//DNA-directed RNA polymerase II subunit RPB1 [EC:2.7.7.6]+ko03020//RNA polymerase;K10990//RecQ-mediated genome instability protein 1;K13171//serine/arginine repetitive matrix protein 1+ko03015//mRNA surveillance pathway+ko03013//RNA transport
TraesCS7A02G128900	15.49	7.57	7.25	5.57	11.59	6.01	21.76	30.1	14.08	16.17	19.37	13.66	1.12587	3.87706e-132	0.707138	4.9222e-46	1.50975	7.48324e-206	1.09101	1.6935e-93	1.11126	1.08946e-223			K02184//formin 2;K02184//formin 2	XP_020978453.1|2.3e-26|formin-like protein 14 isoform X2 [Arachis ipaensis]
TraesCS1D02G060600	6.44	3.09	2.42	1.59	4.22	2.86	9.15	8.97	9.26	6.37	8.43	3.59	1.19702	1.42173e-109	0.629441	4.28086e-26	1.65528	1.18412e-176	1.0877	1.62781e-63	1.15266	6.47978e-171			K06901//putative MFS transporter, AGZA family, xanthine/uracil permease	PAN20429.1|6.9e-282|hypothetical protein PAHAL_C03361 [Panicum hallii]
TraesCS7B02G137600	7.64	5.65	6.99	0	0	0	18.32	17.99	18.79	0.12	0.24	0.08	1.44324	1.00838e-252	-5.51516	0	12.894	0	5.93562	1.08151e-08	1.45689	1.6979e-258			K01872//alanyl-tRNA synthetase [EC:6.1.1.7]+ko00970//Aminoacyl-tRNA biosynthesis;K01872//alanyl-tRNA synthetase [EC:6.1.1.7]+ko00970//Aminoacyl-tRNA biosynthesis	XP_020200962.1|4.7e-242|alanine--tRNA ligase-like isoform X1 [Aegilops tauschii subsp. tauschii]
TraesCS5D02G125700	27.65	13.71	9.88	12.92	36.9	18.09	44.95	66.82	27.46	38.36	56.83	20.73	1.447	0	1.18761	0	1.03316	0	0.773761	5.63433e-165	1.10321	0			K14209//solute carrier family 36 (proton-coupled amino acid transporter)	BAK02045.1|1.1e-276|predicted protein [Hordeum vulgare subsp. vulgare]	GO:0006811//ion transport;GO:0051179//localization;GO:0006820//anion transport;GO:0046942//carboxylic acid transport;GO:0098656//anion transmembrane transport;GO:0006865//amino acid transport;GO:0051234//establishment of localization;GO:0071705//nitrogen compound transport;GO:0015849//organic acid transport;GO:0015711//organic anion transport;GO:0003333//amino acid transmembrane transport;GO:0034…
TraesCS5D02G190600	4.89	4.3	3.86	1.45	2.02	2.54	7.4	6.7	4.69	6.44	9.71	3.99	0.529678	1.1635e-52	0.633505	9.79942e-77	1.64394	0	1.74777	0	1.0318	0			K05681//ATP-binding cassette, subfamily G (WHITE), member 2+ko02010//ABC transporters;K05681//ATP-binding cassette, subfamily G (WHITE), member 2+ko02010//ABC transporters;K05681//ATP-binding cassette, subfamily G (WHITE), member 2+ko02010//ABC transporters;K05681//ATP-binding cassette, subfamily G (WHITE), member 2+ko02010//ABC transporters	XP_010238072.1|0.0e+00|PREDICTED: ABC transporter G family member 53 [Brachypodium distachyon]	GO:0051179//localization;GO:0051234//establishment of localization;GO:0006810//transport;GO:0005886//plasma membrane;GO:0016021//integral component of membrane;GO:0031224//intrinsic component of membrane;GO:0005623//cell;GO:0044464//cell part;GO:0044425//membrane part;GO:0071944//cell periphery;GO:0016020//membrane;GO:0015405//P-P-bond-hydrolysis-driven transmembrane transporter activity;GO:00305…
TraesCS1B02G389700	9.76	6.38	6.89	7.9	12.38	8.08	31.28	41.33	24.64	17.45	13.36	16.96	2.08171	0	1.0593	6.24346e-80	1.77215	0	0.749736	3.61224e-45	1.50001	0	AP2-EREBP	Malus x domestica AP2 domain class transcription factor (AP2D43) mRNA, complete cds	K09286//EREBP-like factor	AFP49820.1|7.2e-145|ethylene responsive transcription factor 6 [Triticum turgidum subsp. durum]	GO:0010467//gene expression;GO:0009059//macromolecule biosynthetic process;GO:0071704//organic substance metabolic process;GO:1901362//organic cyclic compound biosynthetic process;GO:0044238//primary metabolic process;GO:0034654//nucleobase-containing compound biosynthetic process;GO:1901576//organic substance biosynthetic process;GO:0044271//cellular nitrogen compound biosynthetic process;GO:000…
TraesCS5A02G465400	20.71	12.5	13.08	8.68	17.57	12.84	49.63	60.69	48.48	19.22	20.06	19.6	1.7869	1.10067e-157	0.374833	1.18484e-05	1.99885	3.89946e-182	0.58679	4.27982e-11	1.35286	2.51779e-144				EMT13184.1|3.9e-23|hypothetical protein F775_03172 [Aegilops tauschii]
TraesCS4D02G238800	50.02	13.1	10.17	21.63	53.1	15.02	94.06	139.19	34.56	50.7	82.79	20.14	1.87552	0	1.07815	0	1.57557	0	0.778201	9.92696e-222	1.37665	0			K01723//hydroperoxide dehydratase [EC:4.2.1.92]+ko00592//alpha-Linolenic acid metabolism+ko01100//Metabolic pathways+ko01110//Biosynthesis of secondary metabolites	CAB86384.1|2.8e-251|allene oxide synthase [Hordeum vulgare subsp. vulgare]	GO:0008202//steroid metabolic process;GO:0044238//primary metabolic process;GO:0008152//metabolic process;GO:0016125//sterol metabolic process;GO:1901360//organic cyclic compound metabolic process;GO:0071704//organic substance metabolic process;GO:0006629//lipid metabolic process;GO:1901615//organic hydroxy compound metabolic process;GO:0048037//cofactor binding;GO:0046906//tetrapyrrole binding;G…
TraesCS7A02G130300	2.79	1.73	1.87	1.77	2.21	1.61	4.49	6.16	2.42	4.6	3.96	2.87	1.0324	4.29607e-45	0.87423	5.60461e-31	1.2205	3.21613e-58	1.06232	5.27231e-42	1.04652	2.76323e-85			K03327//multidrug resistance protein, MATE family;K03327//multidrug resistance protein, MATE family	XP_003574646.1|6.5e-246|PREDICTED: protein DETOXIFICATION 27-like [Brachypodium distachyon]	GO:0050896//response to stimulus;GO:0006855//drug transmembrane transport;GO:0042221//response to chemical;GO:0006810//transport;GO:0051234//establishment of localization;GO:0042493//response to drug;GO:0055085//transmembrane transport;GO:0015893//drug transport;GO:0051179//localization;GO:0031224//intrinsic component of membrane;GO:0016021//integral component of membrane;GO:0044425//membrane par…
TraesCS3D02G074600	1.43	0.57	0.59	0.99	1.47	1.27	2.88	4.14	1.55	1.95	1.92	1.51	1.73339	2.31963e-99	1.07067	3.46548e-31	1.20037	7.7322e-58	0.537655	1.75382e-10	1.15208	1.76301e-87			K11323//histone arginine demethylase JMJD6 [EC:1.14.11.-];K11323//histone arginine demethylase JMJD6 [EC:1.14.11.-];K11323//histone arginine demethylase JMJD6 [EC:1.14.11.-];K11323//histone arginine demethylase JMJD6 [EC:1.14.11.-]	XP_020191679.1|0.0e+00|uncharacterized protein LOC109777457 isoform X2 [Aegilops tauschii subsp. tauschii]
TraesCS1D02G376600	15.03	11.54	11.69	14.31	18.58	13.76	39.27	48.59	38.44	25.54	18.9	24.15	1.7244	0	0.847163	2.03256e-97	1.4313	0	0.554067	7.08042e-47	1.20086	0	AP2-EREBP	Malus x domestica AP2 domain class transcription factor (AP2D43) mRNA, complete cds	K09286//EREBP-like factor	XP_020149094.1|5.1e-153|ethylene-responsive transcription factor ERF109-like [Aegilops tauschii subsp. tauschii]	GO:0044260//cellular macromolecule metabolic process;GO:0046483//heterocycle metabolic process;GO:0009059//macromolecule biosynthetic process;GO:0090304//nucleic acid metabolic process;GO:0008152//metabolic process;GO:0006807//nitrogen compound metabolic process;GO:0044238//primary metabolic process;GO:0016070//RNA metabolic process;GO:0097659//nucleic acid-templated transcription;GO:1901362//org…
TraesCSU02G137300	14.18	13.74	8.24	14.87	10.11	11.08	36.88	51.94	42.27	15.85	17.43	26.8	1.86074	0	0.736599	2.13572e-88	1.85754	0	0.733403	2.49857e-87	1.40729	0			K05747//Wiskott-Aldrich syndrome protein+ko04144//Endocytosis	CAD22154.1|5.4e-38|pherophorin-dz1 protein [Volvox carteri f. nagariensis]
TraesCS7D02G085800	7.83	4	4.5	6.03	8.01	6.96	19.3	29.73	13.43	8.78	12.21	7.91	1.93787	0	0.828484	9.26125e-73	1.57138	0	0.461997	1.08301e-26	1.29665	0			K04733//interleukin-1 receptor-associated kinase 4 [EC:2.7.11.1]	XP_020170323.1|0.0e+00|wall-associated receptor kinase 3-like isoform X1 [Aegilops tauschii subsp. tauschii]
TraesCS6D02G299700	1.38	1.42	0.95	0.35	0.79	1.49	5.4	0.47	2.46	3.29	2.66	0.96	1.1564	2.49666e-25	0.890973	2.37677e-14	1.6626	1.68813e-42	1.39718	8.16098e-28	1.26044	4.63288e-51			K00430//peroxidase [EC:1.11.1.7]+ko01100//Metabolic pathways+ko01110//Biosynthesis of secondary metabolites+ko00940//Phenylpropanoid biosynthesis	XP_020195048.1|2.3e-208|peroxidase 2-like [Aegilops tauschii subsp. tauschii]
TraesCS4B02G390200	106.8	67.7	55.14	16.1	31.72	30.6	157.15	139.61	87.61	122.76	231.91	62.65	0.793162	7.90266e-305	0.905463	0	1.72887	0	1.84117	0	1.24118	0			K01371//cathepsin K [EC:3.4.22.38];K16292//KDEL-tailed cysteine endopeptidase [EC:3.4.22.-];K16292//KDEL-tailed cysteine endopeptidase [EC:3.4.22.-];K01365//cathepsin L [EC:3.4.22.15]+ko04145//Phagosome;K01371//cathepsin K [EC:3.4.22.38];K16292//KDEL-tailed cysteine endopeptidase [EC:3.4.22.-]	XP_020201709.1|1.5e-209|ervatamin-B-like [Aegilops tauschii subsp. tauschii]
TraesCS6D02G401100	1.66	2.13	2.67	2.62	2.41	4.81	2.53	1.58	4.54	11.23	9.92	14.01	0.414765	1.9507e-06	2.44442	0	-0.193574	0.0138244	1.83608	4.27613e-240	1.42035	3.12799e-207			K21952//CASK-interacting protein	NP_001144243.1|2.8e-160|uncharacterized protein LOC100277111 [Zea mays]	GO:0043170//macromolecule metabolic process;GO:0006725//cellular aromatic compound metabolic process;GO:0090304//nucleic acid metabolic process;GO:0009987//cellular process;GO:0016070//RNA metabolic process;GO:0044260//cellular macromolecule metabolic process;GO:0006807//nitrogen compound metabolic process;GO:0009451//RNA modification;GO:0044237//cellular metabolic process;GO:0034641//cellular ni…
TraesCS3B02G441300	2.58	3.01	1.63	2.74	2.77	4.75	8.05	7.31	4.99	8.99	7.31	12.6	1.5349	1.67012e-139	1.95432	3.90999e-258	1.06901	5.49801e-80	1.48843	8.53165e-176	1.50791	0		Medicago truncatula NBS resistance protein (MTR_4g055630) mRNA, complete cds	K14209//solute carrier family 36 (proton-coupled amino acid transporter);K14209//solute carrier family 36 (proton-coupled amino acid transporter);K14209//solute carrier family 36 (proton-coupled amino acid transporter)	XP_020152082.1|4.4e-276|amino acid permease 3-like [Aegilops tauschii subsp. tauschii]
TraesCS2A02G548100	10.75	13.62	10.03	2.41	2.47	3.19	10.3	18.56	11.44	19.55	19.05	23.96	0.270217	2.67468e-13	0.839467	8.8028e-138	2.36934	0	2.93859	0	1.27405	0			K17839//polyamine oxidase [EC:1.5.3.17 1.5.3.-]+ko00410//beta-Alanine metabolism+ko00330//Arginine and proline metabolism;K17839//polyamine oxidase [EC:1.5.3.17 1.5.3.-]+ko00410//beta-Alanine metabolism+ko00330//Arginine and proline metabolism	XP_006653005.1|2.3e-269|PREDICTED: probable polyamine oxidase 4 [Oryza brachyantha]	GO:0016491//oxidoreductase activity;GO:0003824//catalytic activity;
TraesCS1D02G432000	2.41	3.18	2.71	3.36	2.93	4.77	4.26	3.81	4.25	8.79	6.38	14.36	0.571872	7.74938e-11	1.83449	8.30244e-148	0.150102	0.0668673	1.41272	1.37141e-101	1.10811	9.30117e-99			K13412//calcium-dependent protein kinase [EC:2.7.11.1]+ko04626//Plant-pathogen interaction;K14325//RNA-binding protein with serine-rich domain 1+ko03015//mRNA surveillance pathway+ko03013//RNA transport	XP_020151286.1|1.3e-138|probable membrane-associated kinase regulator 2 [Aegilops tauschii subsp. tauschii]
TraesCS5D02G216400	3.48	2.68	1.7	2.55	3.2	2.04	7.21	9.24	4.63	6.55	6.25	5.98	1.30121	1.68727e-85	1.24004	9.09321e-76	1.28034	4.90857e-83	1.21917	1.79448e-73	1.26072	7.04233e-157			K04733//interleukin-1 receptor-associated kinase 4 [EC:2.7.11.1];K04733//interleukin-1 receptor-associated kinase 4 [EC:2.7.11.1]	XP_020182944.1|3.1e-262|serine/threonine-protein kinase RIPK-like [Aegilops tauschii subsp. tauschii]
TraesCS6B02G420600	14.23	5.7	7.3	2.34	6.3	2.87	21.18	36.53	13.34	11.19	18.19	5.87	1.38699	0	0.380623	2.19131e-18	2.62358	0	1.61721	9.66885e-197	1.45979	0		PREDICTED: Vitis vinifera hypothetical protein LOC100249092 (LOC100249092), mRNA	K22020//mucin-19	XP_020194705.1|6.1e-229|E3 ubiquitin-protein ligase PUB23-like [Aegilops tauschii subsp. tauschii]
TraesCS2B02G336000	11.32	11.7	9.31	10.41	14.17	16.34	31.24	30.9	22.19	28.59	28.88	23.46	1.38739	1.60915e-195	1.33338	2.39437e-176	1.03745	1.38112e-123	0.983438	1.48127e-108	1.17608	4.14369e-294			K02183//calmodulin+ko04016//MAPK signaling pathway - plant+ko04626//Plant-pathogen interaction+ko04070//Phosphatidylinositol signaling system	XP_020179857.1|5.1e-137|esterase AGAP003155 [Aegilops tauschii subsp. tauschii]
TraesCS2A02G440600	0.29	0.85	0.47	1.76	2.92	1.39	11.89	13.2	12.4	4	4.84	3.26	4.5523	3.70656e-90	2.9405	1.06619e-22	2.60364	2.45319e-58	0.991844	3.74964e-06	2.68834	1.17386e-79				XP_020164348.1|1.0e-52|putative lipid-transfer protein DIR1 [Aegilops tauschii subsp. tauschii]
TraesCS5A02G293700	4.05	5.28	3.41	5.09	5.77	8.84	19.05	19.86	13.66	35.91	21.31	43.99	2.04925	2.05955e-195	2.99774	0	1.40958	1.10353e-115	2.35806	0	2.24367	0				XP_020166516.1|3.1e-104|uncharacterized protein LOC109752054 [Aegilops tauschii subsp. tauschii]
TraesCS6A02G305600	2.71	3.38	2.86	2.8	2.81	5.67	8.48	6.53	10.97	8.42	5.66	9.26	1.53671	9.32983e-108	1.38727	2.60217e-83	1.19729	7.76056e-74	1.04785	7.13194e-54	1.28553	9.53795e-155			K00430//peroxidase [EC:1.11.1.7]+ko01100//Metabolic pathways+ko01110//Biosynthesis of secondary metabolites+ko00940//Phenylpropanoid biosynthesis	EMS60222.1|1.3e-189|Peroxidase 72 [Triticum urartu]	GO:0042737//drug catabolic process;GO:0006979//response to oxidative stress;GO:0044237//cellular metabolic process;GO:0042743//hydrogen peroxide metabolic process;GO:0009987//cellular process;GO:0017144//drug metabolic process;GO:0009056//catabolic process;GO:0050896//response to stimulus;GO:0051187//cofactor catabolic process;GO:0006950//response to stress;GO:0044248//cellular catabolic process;…
TraesCS7D02G063900	36.46	24.89	18.09	35.67	56.86	38.65	97.44	118.1	85.12	73.63	64.15	66.11	1.92266	0	1.36402	0	1.19382	0	0.635187	1.52012e-304	1.26369	0			K01583//arginine decarboxylase [EC:4.1.1.19]+ko00330//Arginine and proline metabolism+ko01100//Metabolic pathways	ABX80379.1|0.0e+00|arginine decarboxylase [Triticum aestivum]	GO:0006527//arginine catabolic process;GO:0009058//biosynthetic process;GO:0044249//cellular biosynthetic process;GO:0009266//response to temperature stimulus;GO:0006950//response to stress;GO:0009445//putrescine metabolic process;GO:0009063//cellular amino acid catabolic process;GO:0044271//cellular nitrogen compound biosynthetic process;GO:0044282//small molecule catabolic process;GO:0009309//a…
TraesCS5A02G370200	4.84	3.54	2.93	3.7	6.57	5.53	19.25	22.65	14.24	10.7	9.35	9.66	2.31405	0	1.39764	3.46596e-137	1.82737	0	0.910964	1.28986e-69	1.6676	0			K05359//arogenate/prephenate dehydratase [EC:4.2.1.91 4.2.1.51]+ko01230//Biosynthesis of amino acids+ko01100//Metabolic pathways+ko01110//Biosynthesis of secondary metabolites+ko00400//Phenylalanine, tyrosine and tryptophan biosynthesis	XP_020155658.1|6.4e-234|arogenate dehydratase/prephenate dehydratase 6, chloroplastic-like [Aegilops tauschii subsp. tauschii]	GO:0071704//organic substance metabolic process;GO:0006807//nitrogen compound metabolic process;GO:0019438//aromatic compound biosynthetic process;GO:1901360//organic cyclic compound metabolic process;GO:1902223//erythrose 4-phosphate/phosphoenolpyruvate family amino acid biosynthetic process;GO:0043436//oxoacid metabolic process;GO:0009095//aromatic amino acid family biosynthetic process, prephe…
TraesCS7B02G238300	7.53	2.28	1.85	2.79	9.15	4.15	25.71	32.74	10.82	6.95	14.03	2.89	2.57813	0	1.04664	1.03269e-46	2.1049	0	0.57341	1.67592e-17	1.75634	0			K00430//peroxidase [EC:1.11.1.7]+ko01100//Metabolic pathways+ko01110//Biosynthesis of secondary metabolites+ko00940//Phenylpropanoid biosynthesis	XP_020150150.1|1.1e-176|peroxidase P7-like [Aegilops tauschii subsp. tauschii]
TraesCS4B02G389700	14.15	3.78	3.53	5.9	15.55	5.18	43.17	67.8	14.35	8.87	20.02	2.94	2.61272	0	0.59094	9.93451e-68	2.30386	0	0.282074	2.42138e-18	1.77388	0		Leucine-rich repeat transmembrane protein kinase protein (best arabidopsis hit); senescence-induced receptor-like serine/threonine-protein kinase precursor, putative, expressed (best rice hit)	K04733//interleukin-1 receptor-associated kinase 4 [EC:2.7.11.1];K04733//interleukin-1 receptor-associated kinase 4 [EC:2.7.11.1];K04733//interleukin-1 receptor-associated kinase 4 [EC:2.7.11.1]	XP_020201722.1|0.0e+00|probable LRR receptor-like serine/threonine-protein kinase At1g51810 [Aegilops tauschii subsp. tauschii]	GO:0031224//intrinsic component of membrane;GO:0016020//membrane;GO:0044425//membrane part;GO:0016021//integral component of membrane;GO:1901363//heterocyclic compound binding;GO:0097367//carbohydrate derivative binding;GO:0016301//kinase activity;GO:0030554//adenyl nucleotide binding;GO:0043167//ion binding;GO:0003824//catalytic activity;GO:0032553//ribonucleotide binding;GO:0016773//phosphotran…
TraesCS4B02G253300	2.21	1.4	1.56	0.99	1.04	1.08	4.42	5.92	3.5	2.02	2.52	1.39	1.42252	9.3589e-116	0.20185	0.00883888	2.17158	1.74672e-205	0.950907	3.19863e-27	1.26596	1.58777e-137			K15923//alpha-L-fucosidase 2 [EC:3.2.1.51]+ko00511//Other glycan degradation;K15923//alpha-L-fucosidase 2 [EC:3.2.1.51]+ko00511//Other glycan degradation;K15923//alpha-L-fucosidase 2 [EC:3.2.1.51]+ko00511//Other glycan degradation;K15923//alpha-L-fucosidase 2 [EC:3.2.1.51]+ko00511//Other glycan degradation	XP_020161325.1|0.0e+00|alpha-L-fucosidase 2-like [Aegilops tauschii subsp. tauschii]	GO:0016798//hydrolase activity, acting on glycosyl bonds;GO:0016787//hydrolase activity;GO:0003824//catalytic activity;GO:0015928//fucosidase activity;GO:0004560//alpha-L-fucosidase activity;GO:0004553//hydrolase activity, hydrolyzing O-glycosyl compounds;
BGI_novel_G011784	10.61	3.23	2.43	4.43	11.9	3.25	21.77	36.9	9.74	10.17	17.37	5.76	2.07692	0	1.04176	1.37215e-86	1.80309	0	0.767928	3.11275e-52	1.51064	0			K04733//interleukin-1 receptor-associated kinase 4 [EC:2.7.11.1]		GO:0007166//cell surface receptor signaling pathway;GO:0043170//macromolecule metabolic process;GO:0044238//primary metabolic process;GO:0008152//metabolic process;GO:0006807//nitrogen compound metabolic process;GO:0051716//cellular response to stimulus;GO:0050794//regulation of cellular process;GO:0044267//cellular protein metabolic process;GO:0050896//response to stimulus;GO:0006796//phosphate-…
TraesCS1D02G266200	10.7	5.34	4.96	3.19	7.56	4.5	22.53	31.73	7.97	13.38	17.27	4.99	1.57306	0	0.772561	4.50343e-60	2.02803	0	1.22754	9.66473e-127	1.43865	0			K00145//N-acetyl-gamma-glutamyl-phosphate reductase [EC:1.2.1.38]+ko00220//Arginine biosynthesis+ko01230//Biosynthesis of amino acids+ko01100//Metabolic pathways+ko01110//Biosynthesis of secondary metabolites+ko01210//2-Oxocarboxylic acid metabolism	XP_020169603.1|8.7e-257|phospholipase A1-II 7-like [Aegilops tauschii subsp. tauschii]
TraesCS3A02G528900	2.02	2.67	1.58	2.77	3	3.62	3.11	4.38	2.82	7.59	6.8	7.54	0.721346	9.73817e-18	1.81173	2.2859e-148	0.131075	0.0850297	1.22145	3.23241e-83	1.04016	1.74689e-94			K01369//legumain [EC:3.4.22.34]	CDM87100.1|9.3e-273|unnamed protein product [Triticum aestivum]
TraesCS2D02G289900	35.01	19.4	18.55	16.5	26.01	19.75	79.61	95.43	61.38	39.65	42.84	37.87	1.70432	0	0.708771	1.08958e-162	1.93653	0	0.940985	5.18811e-262	1.40468	0			K05359//arogenate/prephenate dehydratase [EC:4.2.1.91 4.2.1.51]+ko01230//Biosynthesis of amino acids+ko01100//Metabolic pathways+ko01110//Biosynthesis of secondary metabolites+ko00400//Phenylalanine, tyrosine and tryptophan biosynthesis;K05359//arogenate/prephenate dehydratase [EC:4.2.1.91 4.2.1.51]+ko01230//Biosynthesis of amino acids+ko01100//Metabolic pathways+ko01110//Biosynthesis of secondar…	XP_020159198.1|4.7e-160|arogenate dehydratase/prephenate dehydratase 6, chloroplastic-like [Aegilops tauschii subsp. tauschii]	GO:0006558//L-phenylalanine metabolic process;GO:0009094//L-phenylalanine biosynthetic process;GO:0046394//carboxylic acid biosynthetic process;GO:0044283//small molecule biosynthetic process;GO:0009095//aromatic amino acid family biosynthetic process, prephenate pathway;GO:1902221//erythrose 4-phosphate/phosphoenolpyruvate family amino acid metabolic process;GO:0009073//aromatic amino acid famil…
TraesCS4D02G285300	16.37	6.12	5.76	6.45	13.23	4.95	37.32	58.8	19	18.76	26.64	6.04	2.03144	0	0.874196	5.17282e-105	2.22327	0	1.06603	1.20509e-144	1.66161	0			K13412//calcium-dependent protein kinase [EC:2.7.11.1]+ko04626//Plant-pathogen interaction;K17987//next to BRCA1 gene 1 protein	BAK02816.1|6.7e-241|predicted protein [Hordeum vulgare subsp. vulgare]	GO:0071704//organic substance metabolic process;GO:0009056//catabolic process;GO:0008152//metabolic process;GO:0016042//lipid catabolic process;GO:0044238//primary metabolic process;GO:1901575//organic substance catabolic process;GO:0006629//lipid metabolic process;GO:0044464//cell part;GO:0016020//membrane;GO:0044424//intracellular part;GO:0005622//intracellular;GO:0005737//cytoplasm;GO:0005623/…
BGI_novel_G004153	11.07	5.38	6.06	0	0.07	0.14	0.03	0.13	0.03	15.19	17.95	12.94	-6.83267	4.97972e-160	1.04472	3.04844e-58	-0.0878915	0.914402	7.78949	1.10413e-302	1.02164	3.8797e-56			K01188//beta-glucosidase [EC:3.2.1.21]+ko01100//Metabolic pathways+ko00500//Starch and sucrose metabolism+ko01110//Biosynthesis of secondary metabolites+ko00460//Cyanoamino acid metabolism+ko00940//Phenylpropanoid biosynthesis;K13447//respiratory burst oxidase [EC:1.6.3.- 1.11.1.-]+ko04016//MAPK signaling pathway - plant+ko04626//Plant-pathogen interaction;K17757//ATP-dependent NAD(P)H-hydrate de…
TraesCS3B02G285700	4.5	3.13	2.16	1.84	2.76	2.03	9.68	11.62	7.7	3.37	3.53	3.3	1.57036	5.22152e-139	0.0661581	0.416672	2.12679	3.29015e-208	0.622592	4.38819e-12	1.26062	1.28472e-134			K22020//mucin-19	XP_020178213.1|1.4e-237|F-box/kelch-repeat protein At1g23390-like [Aegilops tauschii subsp. tauschii]
TraesCS5D02G128200	0.42	0.5	0.39	1.21	2.26	1.83	3.03	3.09	2.33	1.82	2.11	1.59	2.6628	1.30788e-55	2.07324	3.46367e-28	0.655074	4.77261e-08	0.0655121	0.623123	1.0758	5.47201e-27	MYB		K09422//transcription factor MYB, plant;K09422//transcription factor MYB, plant	XP_020201126.1|7.0e-159|myb-related protein 308-like [Aegilops tauschii subsp. tauschii]	GO:0009987//cellular process;GO:0050789//regulation of biological process;GO:0006357//regulation of transcription from RNA polymerase II promoter;GO:0051252//regulation of RNA metabolic process;GO:0006355//regulation of transcription, DNA-templated;GO:0030154//cell differentiation;GO:2000112//regulation of cellular macromolecule biosynthetic process;GO:0048869//cellular developmental process;GO:0…
TraesCS7D02G554400	6.45	4.97	4.78	2.23	3.1	2.62	10.66	9.68	9.47	6.02	6.68	6.47	0.883339	9.81481e-23	0.255773	0.0110575	1.89454	1.64993e-69	1.26698	5.78817e-26	1.02182	9.81499e-46			K15706//E3 ubiquitin-protein ligase RNF167 [EC:2.3.2.27];K19040//E3 ubiquitin-protein ligase ATL10/75/76/77/78 [EC:2.3.2.27]	XP_020164447.1|6.9e-114|probable E3 ubiquitin-protein ligase ATL44 [Aegilops tauschii subsp. tauschii]
TraesCS2B02G219500	3.72	2.34	2.37	1.63	1.85	1.46	5.79	6.85	5.58	3.53	4.98	2.29	1.11532	3.20059e-28	0.369503	0.00138811	1.87697	4.46427e-59	1.13115	1.16478e-17	1.12175	2.91518e-44				EMT07237.1|1.2e-33|Putative LRR receptor-like serine/threonine-protein kinase [Aegilops tauschii]
TraesCS7B02G261100	6.84	3.38	5.37	6.15	5.43	4.21	21.25	27.92	17.41	8.54	17.3	7.13	2.09769	5.75302e-185	1.09271	1.05595e-36	2.06551	1.58081e-180	1.06054	7.00227e-35	1.66795	1.83512e-202				XP_020152188.1|1.0e-67|uncharacterized protein LOC109737470 [Aegilops tauschii subsp. tauschii]
TraesCS2D02G216500	3.73	3.97	2.97	3.48	3.8	4.14	10.65	10.35	7.88	5.14	3.91	7.6	1.44144	3.55318e-70	0.650052	3.88531e-12	1.33197	3.71601e-62	0.540577	4.39352e-09	1.04627	9.80882e-67			K22020//mucin-19	OSX76643.1|1.8e-06|LOW QUALITY PROTEIN: hypothetical protein BU14_0183s0035 [Porphyra umbilicalis]
BGI_novel_G005382	3.68	1.75	1.21	1.21	2.23	1.85	8.57	14.02	5.47	1.57	1.96	0.66	2.08623	7.17066e-60	-0.648317	0.00164607	2.39441	3.29375e-70	-0.340138	0.118352	1.44006	1.41968e-41
TraesCS1A02G149700	9.57	6.41	6.43	7.03	9.32	7.27	13.09	21.21	12.17	16.79	17.81	13.29	1.05352	0	1.09852	0	0.975715	0	1.02071	0	1.03681	0		Hordeum vulgare subsp. vulgare mRNA for predicted protein, complete cds, clone: NIASHv1023B20	K13420//LRR receptor-like serine/threonine-protein kinase FLS2 [EC:2.7.11.1]+ko04016//MAPK signaling pathway - plant+ko04626//Plant-pathogen interaction	XP_020186678.1|0.0e+00|probable leucine-rich repeat receptor-like protein kinase At1g35710 [Aegilops tauschii subsp. tauschii]	GO:0044425//membrane part;GO:0031224//intrinsic component of membrane;GO:0016021//integral component of membrane;GO:0016020//membrane;GO:0043168//anion binding;GO:0005524//ATP binding;GO:0032555//purine ribonucleotide binding;GO:0003824//catalytic activity;GO:0016773//phosphotransferase activity, alcohol group as acceptor;GO:0032553//ribonucleotide binding;GO:0140096//catalytic activity, acting o…
TraesCS6D02G157600	1.19	0.83	0.71	1.66	1.9	1.2	5.59	3.83	1.42	2.13	2.14	2.08	1.99163	1.0779e-41	1.22209	4.43236e-13	1.18435	2.70943e-20	0.414806	0.00479893	1.20244	5.43612e-32				XP_020169336.1|1.4e-99|uncharacterized protein LOC109754858 [Aegilops tauschii subsp. tauschii]
BGI_novel_G001062	3.62	1.62	1.32	1.27	1.79	0.62	8.56	12.48	4.86	6.7	6.87	1.83	1.98704	1.57921e-222	1.24186	4.35239e-68	2.81017	0	2.06499	8.42801e-139	2.01607	0	HSF		K09419//heat shock transcription factor, other eukaryote
TraesCS6A02G323000	10.68	10.38	11.67	0	0	4.07	21.11	26.56	19.27	18.01	18.18	14.41	1.03506	1.35711e-72	0.639334	3.74713e-25	4.03146	0	3.63574	6.44217e-268	1.67631	8.33524e-262				XP_020161519.1|2.1e-42|uncharacterized protein LOC109746829 [Aegilops tauschii subsp. tauschii]
TraesCS2B02G540300	8.58	10.05	7.83	8.94	12.25	13.18	24.85	24.46	21.54	17.8	14.66	19.14	1.424	1.48684e-301	0.968519	1.2311e-119	1.04003	1.05431e-183	0.584544	1.23138e-50	1.01178	2.64138e-302			K18801//glucuronoxylan 4-O-methyltransferase [EC:2.1.1.112]	XP_020199133.1|9.5e-176|protein IRX15-LIKE-like [Aegilops tauschii subsp. tauschii]	GO:0044038//cell wall macromolecule biosynthetic process;GO:0010383//cell wall polysaccharide metabolic process;GO:0070592//cell wall polysaccharide biosynthetic process;GO:0042546//cell wall biogenesis;GO:0071554//cell wall organization or biogenesis;GO:0044260//cellular macromolecule metabolic process;GO:0009058//biosynthetic process;GO:0044237//cellular metabolic process;GO:0034645//cellular m…
TraesCS6B02G186000	0.53	0.95	0.65	1.91	2.14	0.53	46.68	73.68	40.9	2.64	4.36	1.2	6.2479	0	1.95749	4.25437e-37	5.13267	0	0.842255	3.42921e-11	4.66776	0			K05953//nicotianamine synthase [EC:2.5.1.43]	AND77092.1|2.9e-181|nicotianamine synthase [Triticum aestivum]
TraesCS4B02G058200	0.82	1.22	0.57	1.85	2.14	1.22	2.54	4.75	2.13	4.96	3.92	5.92	1.8545	3.47638e-76	2.50539	1.14602e-170	0.852887	6.69063e-24	1.50378	1.49133e-87	1.63058	2.94742e-160			K01762//1-aminocyclopropane-1-carboxylate synthase [EC:4.4.1.14]+ko01100//Metabolic pathways+ko01110//Biosynthesis of secondary metabolites+ko00270//Cysteine and methionine metabolism	XP_020156806.1|7.3e-274|1-aminocyclopropane-1-carboxylate synthase 1-like [Aegilops tauschii subsp. tauschii]	GO:0009058//biosynthetic process;GO:0008152//metabolic process;GO:0050662//coenzyme binding;GO:0005488//binding;GO:0097159//organic cyclic compound binding;GO:0043168//anion binding;GO:0030170//pyridoxal phosphate binding;GO:0043167//ion binding;GO:1901363//heterocyclic compound binding;GO:0036094//small molecule binding;GO:0019842//vitamin binding;GO:0070279//vitamin B6 binding;GO:0003824//catal…
TraesCS3B02G256500	2.59	3.18	2.17	2.86	3.46	5.24	14.53	14.13	10.94	11.15	6.92	15.61	2.2186	0	2.04703	0	1.73113	0	1.55956	1.58553e-245	1.87283	0			K07428//cytochrome P450 family 4 subfamily X [EC:1.14.14.1];K07428//cytochrome P450 family 4 subfamily X [EC:1.14.14.1];K07426//cytochrome P450 family 4 subfamily B polypeptide 1 [EC:1.14.14.1]	XP_020150752.1|1.1e-259|cytochrome P450 72A11-like [Aegilops tauschii subsp. tauschii]	GO:0046906//tetrapyrrole binding;GO:0020037//heme binding;GO:0016491//oxidoreductase activity;GO:0046872//metal ion binding;GO:0005488//binding;GO:1901363//heterocyclic compound binding;GO:0048037//cofactor binding;GO:0004497//monooxygenase activity;GO:0005506//iron ion binding;GO:0046914//transition metal ion binding;GO:0003824//catalytic activity;GO:0097159//organic cyclic compound binding;GO:0…
TraesCS3A02G532700	0.68	0.73	0.59	0.96	1.47	1.78	3.8	4.28	2.17	1.75	1.46	1.84	2.36064	5.1868e-120	1.33735	3.14842e-28	1.28579	1.69428e-52	0.262494	0.00935125	1.30814	1.39745e-79		Sorghum bicolor clone BAC Sbb12448, complete sequence.	K19044//E3 ubiquitin-protein ligase XBAT32/33 [EC:2.3.2.27]	CDM87189.1|2.4e-259|unnamed protein product [Triticum aestivum]
TraesCSU02G231800	5.43	1.97	1.58	2.53	7.74	3.4	25.02	35.51	13.64	10.71	14.31	4.58	3.05454	1.73081e-240	1.73945	1.17648e-50	2.43045	1.42643e-188	1.11536	1.42931e-26	2.20174	8.65326e-235			K03006//DNA-directed RNA polymerase II subunit RPB1 [EC:2.7.7.6]+ko03020//RNA polymerase	XP_020148562.1|5.1e-86|mavicyanin-like [Aegilops tauschii subsp. tauschii]
TraesCS7D02G176000	3.16	2.4	1.93	2.57	5	3.49	18.38	15.32	10.55	15.75	11.99	10.13	2.56718	0	2.34523	1.01004e-277	1.99845	1.0356e-265	1.7765	8.73547e-194	2.1503	0			K05894//12-oxophytodienoic acid reductase [EC:1.3.1.42]+ko00592//alpha-Linolenic acid metabolism+ko01100//Metabolic pathways+ko01110//Biosynthesis of secondary metabolites	BAJ97467.1|2.7e-206|predicted protein [Hordeum vulgare subsp. vulgare]
TraesCS2A02G309500	4.78	3.57	4.78	4.39	6.11	5.19	18.14	23.11	14.58	14.78	15.53	15.47	2.06079	0	1.79737	0	1.80029	0	1.53687	9.65137e-277	1.80041	0			K13144//integrator complex subunit 7;K08740//DNA mismatch repair protein MSH4;K13144//integrator complex subunit 7;K08740//DNA mismatch repair protein MSH4	XP_020151538.1|2.6e-215|uncharacterized protein LOC109736742 [Aegilops tauschii subsp. tauschii]	GO:0005737//cytoplasm;GO:0005622//intracellular;GO:0005623//cell;GO:0044464//cell part;GO:0044424//intracellular part;
BGI_novel_G009575	9.55	13.71	10.5	2.76	1.15	1.89	15.15	15.67	24.29	10.08	14.1	22.34	0.706585	3.75825e-55	0.467124	4.60814e-23	3.23937	0	2.99991	0	1.35777	4.19515e-290			K00703//starch synthase [EC:2.4.1.21]+ko01100//Metabolic pathways+ko00500//Starch and sucrose metabolism+ko01110//Biosynthesis of secondary metabolites;K01674//carbonic anhydrase [EC:4.2.1.1]+ko00910//Nitrogen metabolism
TraesCSU02G069200	2.09	2.82	3.39	1.23	1.88	2.93	6.46	2.2	9.98	4.49	3.58	2.69	1.16307	3.93897e-52	0.379804	1.57369e-05	1.61642	1.86777e-84	0.833157	2.42375e-18	1.03424	2.44619e-67			K13081//leucoanthocyanidin reductase [EC:1.17.1.3]+ko01110//Biosynthesis of secondary metabolites+ko00941//Flavonoid biosynthesis	EMS45018.1|5.6e-196|Leucoanthocyanidin reductase [Triticum urartu]
TraesCS1A02G033200	3.11	2.5	1.96	3.06	6.79	3.73	10.5	15.04	7.59	5.66	5.9	4.56	2.13488	1.5527e-305	1.09712	1.48175e-57	1.28502	5.60531e-149	0.247255	3.10628e-05	1.22585	2.66381e-205			K18134//protein O-GlcNAc transferase [EC:2.4.1.255]+ko00514//Other types of O-glycan biosynthesis	BAJ98181.1|8.6e-264|predicted protein [Hordeum vulgare subsp. vulgare]	GO:0016021//integral component of membrane;GO:0031224//intrinsic component of membrane;GO:0016020//membrane;GO:0044425//membrane part;GO:0016757//transferase activity, transferring glycosyl groups;GO:0003824//catalytic activity;GO:0016740//transferase activity;
TraesCS7B02G372600	0.99	1.03	0.69	1.28	1.02	1.64	4.46	5.29	2.1	1.21	0.81	1.04	2.13379	1.07331e-54	0.184185	0.339072	1.5861	5.95143e-37	-0.363505	0.0384912	1.17291	8.698e-30			K12655//OTU domain-containing protein 5 [EC:3.4.19.12];K13717//OTU domain-containing protein 3 [EC:3.4.19.12];K16743//abnormal spindle-like microcephaly-associated protein	XP_020201467.1|2.9e-127|OTU domain-containing protein DDB_G0284757-like [Aegilops tauschii subsp. tauschii]
TraesCS1D02G095100	1.94	0.98	1.33	0.8	1.72	0.64	3.33	4.4	1.82	2.43	3.42	1.25	1.17155	1.08583e-18	0.748678	1.73852e-07	1.58968	1.0959e-28	1.1668	4.15331e-14	1.16986	3.19356e-31			K00799//glutathione S-transferase [EC:2.5.1.18]+ko00480//Glutathione metabolism	EMT09006.1|6.2e-127|hypothetical protein F775_15985 [Aegilops tauschii]
TraesCS7D02G497300	27.5	13.47	15.65	7.49	13.2	9.75	55.07	78.47	53.18	32.17	26.46	30.54	1.74356	0	0.672248	1.3222e-111	2.59924	0	1.52793	0	1.67171	0	WRKY	Disease resistance protein (TIR-NBS-LRR class) (best arabidopsis hit)	K18835//WRKY transcription factor 2+ko04626//Plant-pathogen interaction;K13412//calcium-dependent protein kinase [EC:2.7.11.1]+ko04626//Plant-pathogen interaction;K18835//WRKY transcription factor 2+ko04626//Plant-pathogen interaction;K13412//calcium-dependent protein kinase [EC:2.7.11.1]+ko04626//Plant-pathogen interaction;K13412//calcium-dependent protein kinase [EC:2.7.11.1]+ko04626//Plant-pat…	XP_020197055.1|1.0e-180|WRKY transcription factor WRKY28-like [Aegilops tauschii subsp. tauschii]
TraesCS4B02G072200	6.99	4.04	3.97	4.97	8.16	6.95	19.49	24.4	15.99	9.31	8.22	8.35	1.99918	0	0.790505	2.49526e-53	1.57392	0	0.365238	2.39536e-14	1.29425	0			K14963//COMPASS component SWD3;K16794//platelet-activating factor acetylhydrolase IB subunit alpha+ko01100//Metabolic pathways+ko00565//Ether lipid metabolism	XP_020159033.1|4.6e-257|protein JINGUBANG-like [Aegilops tauschii subsp. tauschii]
TraesCS4B02G304200	16.83	3.67	3.34	9.56	25.6	7.92	44.85	71.04	21.8	21.4	34.72	10.21	2.53543	0	1.48697	3.33515e-218	1.67338	0	0.624923	3.59759e-53	1.61511	0			K07893//Ras-related protein Rab-6A;K00850//6-phosphofructokinase 1 [EC:2.7.1.11]+ko00010//Glycolysis / Gluconeogenesis+ko00030//Pentose phosphate pathway+ko01230//Biosynthesis of amino acids+ko03018//RNA degradation+ko01100//Metabolic pathways+ko00052//Galactose metabolism+ko00051//Fructose and mannose metabolism+ko01110//Biosynthesis of secondary metabolites+ko01200//Carbon metabolism;K13412//ca…	XP_020153375.1|2.2e-214|purine permease 3-like [Aegilops tauschii subsp. tauschii]
TraesCS2D02G112300	2.85	2.33	4.54	5.11	4.93	6	11.07	18.34	9.72	5.22	3.37	4.12	2.01163	5.34128e-120	0.395829	0.000554152	1.27752	4.92335e-63	-0.338281	0.000827823	1.01211	7.93659e-58			K22020//mucin-19	XP_020182454.1|1.7e-90|universal stress protein PHOS34-like isoform X2 [Aegilops tauschii subsp. tauschii]
TraesCS3D02G368900	1.36	1.49	1.04	1.54	2.16	1.99	2.44	3.79	2.35	4.49	2.84	6.18	1.14706	3.22297e-20	1.80173	1.02684e-58	0.588528	2.05978e-07	1.2432	1.65797e-34	1.20437	6.46706e-53			K01183//chitinase [EC:3.2.1.14]+ko00520//Amino sugar and nucleotide sugar metabolism+ko01100//Metabolic pathways	XP_020158522.1|7.3e-178|acidic endochitinase-like [Aegilops tauschii subsp. tauschii]	GO:1901575//organic substance catabolic process;GO:0043170//macromolecule metabolic process;GO:0006040//amino sugar metabolic process;GO:1901564//organonitrogen compound metabolic process;GO:1901072//glucosamine-containing compound catabolic process;GO:0009987//cellular process;GO:0071704//organic substance metabolic process;GO:0006032//chitin catabolic process;GO:0042737//drug catabolic process;…
TraesCS2A02G141700	16.18	15.31	16.6	13.27	18.2	15.45	1.24	3.54	0.71	2.32	4.41	0.74	-3.13086	1.64393e-140	-3.13086	9.75677e-107	-3.09532	2.36393e-101	-3.09532	3.24544e-25	-2.89094	4.68644e-112			K13171//serine/arginine repetitive matrix protein 1+ko03015//mRNA surveillance pathway+ko03013//RNA transport;K14325//RNA-binding protein with serine-rich domain 1+ko03015//mRNA surveillance pathway+ko03013//RNA transport	XP_020146612.1|9.5e-110|uncharacterized protein LOC109731846 [Aegilops tauschii subsp. tauschii]	GO:0016043//cellular component organization;GO:0090158//endoplasmic reticulum membrane organization;GO:0032502//developmental process;GO:0006996//organelle organization;GO:0048731//system development;GO:0061025//membrane fusion;GO:0007568//aging;GO:0071840//cellular component organization or biogenesis;GO:0048856//anatomical structure development;GO:0099402//plant organ development;GO:0007275//mu…	sp|Q9LVF1|DMP2_ARATH
TraesCS1D02G034300	4.49	1.98	1.43	6.05	14.79	7.77	22.02	36.66	9.59	15.97	25.11	5.3	3.14345	0	2.59021	0	1.25635	7.47546e-274	0.703112	7.8152e-72	1.66654	0			K03327//multidrug resistance protein, MATE family;K03327//multidrug resistance protein, MATE family	BAJ94821.1|4.8e-240|predicted protein [Hordeum vulgare subsp. vulgare]	GO:0051234//establishment of localization;GO:0015893//drug transport;GO:0042493//response to drug;GO:0051179//localization;GO:0055085//transmembrane transport;GO:0006855//drug transmembrane transport;GO:0006810//transport;GO:0042221//response to chemical;GO:0050896//response to stimulus;GO:0031224//intrinsic component of membrane;GO:0044425//membrane part;GO:0016020//membrane;GO:0016021//integral…
TraesCS5B02G442900	35.71	4.52	5.22	3.41	15.03	2.13	54.23	97.18	16.29	20.65	51.59	5.02	1.86803	0	0.758152	3.65835e-62	3.00921	0	1.89933	3.5388e-255	1.87863	0			K13449//pathogenesis-related protein 1+ko04016//MAPK signaling pathway - plant+ko04626//Plant-pathogen interaction+ko04075//Plant hormone signal transduction;K13449//pathogenesis-related protein 1+ko04016//MAPK signaling pathway - plant+ko04626//Plant-pathogen interaction+ko04075//Plant hormone signal transduction	AHE81270.1|2.8e-97|pathogenesis-related protein 1-6 [Triticum aestivum]
TraesCS7B02G148800	4.89	3.13	3.16	3.86	5.44	4.02	20.38	27.32	13.2	6.73	8.52	6.68	2.44851	0	0.976599	5.73876e-75	2.19049	0	0.718577	6.49696e-45	1.76278	0			K04733//interleukin-1 receptor-associated kinase 4 [EC:2.7.11.1]	BAJ98736.1|0.0e+00|predicted protein [Hordeum vulgare subsp. vulgare]	GO:0007154//cell communication;GO:0050794//regulation of cellular process;GO:0050896//response to stimulus;GO:0007165//signal transduction;GO:0023052//signaling;GO:0065007//biological regulation;GO:0007166//cell surface receptor signaling pathway;GO:0050789//regulation of biological process;GO:0051716//cellular response to stimulus;GO:0009987//cellular process;GO:0071944//cell periphery;GO:000562…
TraesCS1D02G205700	12.1	9.22	10.06	11.15	15.56	11.36	21.79	25.37	18.06	26.96	26.61	24.35	1.06968	7.71721e-198	1.32869	0	0.779469	1.88354e-116	1.03849	8.13116e-223	1.05247	0			K14803//protein phosphatase PTC2/3 [EC:3.1.3.16];K14803//protein phosphatase PTC2/3 [EC:3.1.3.16]	XP_020170711.1|9.4e-214|probable protein phosphatase 2C 47 isoform X1 [Aegilops tauschii subsp. tauschii]	GO:0016791//phosphatase activity;GO:0003824//catalytic activity;GO:0005488//binding;GO:0016788//hydrolase activity, acting on ester bonds;GO:0004721//phosphoprotein phosphatase activity;GO:0043169//cation binding;GO:0016787//hydrolase activity;GO:0042578//phosphoric ester hydrolase activity;GO:0043167//ion binding;GO:0004722//protein serine/threonine phosphatase activity;GO:0046872//metal ion bin…
TraesCS7A02G412700	2.11	1.03	0.83	0.77	1.35	1.05	4.8	5.31	2.5	1.51	1.17	0.83	1.67324	7.54345e-61	-0.169562	0.227048	1.99127	2.50367e-76	0.148459	0.318025	1.18266	1.99799e-46			K21373//7-deoxyloganetic acid glucosyltransferase [EC:2.4.1.323]	XP_020179518.1|1.1e-241|7-deoxyloganetic acid glucosyltransferase-like [Aegilops tauschii subsp. tauschii]
TraesCS3B02G026700	1.17	1.07	0.8	0.88	2.22	2.35	5.55	2.57	4.84	1.85	1.76	1.39	2.09571	9.71458e-105	0.727088	3.03099e-09	1.24378	2.62443e-50	-0.124845	0.239067	1.08599	4.24796e-56			K17500//integrin-linked kinase-associated serine/threonine phosphatase 2C [EC:3.1.3.16];K08360//cytochrome b-561 [EC:1.16.5.1]	XP_020152386.1|2.4e-201|WAT1-related protein At3g18200-like [Aegilops tauschii subsp. tauschii]	GO:0051179//localization;GO:0006810//transport;GO:0051234//establishment of localization;GO:0016020//membrane;GO:0005623//cell;GO:0044464//cell part;GO:0071944//cell periphery;GO:0044425//membrane part;GO:0005886//plasma membrane;GO:0031224//intrinsic component of membrane;GO:0016021//integral component of membrane;GO:0022857//transmembrane transporter activity;GO:0005215//transporter activity;
TraesCS7D02G453600	1.84	0.84	0.65	1.9	1.35	0.98	2.7	3.99	1.91	2.11	3.35	2.33	1.4312	2.47889e-36	1.27515	1.40948e-27	1.01032	1.49882e-21	0.854262	5.17495e-15	1.13104	5.42825e-47		NB-ARC domain-containing disease resistance protein (best arabidopsis hit)	K13413//mitogen-activated protein kinase kinase 4/5 [EC:2.7.12.2]+ko04016//MAPK signaling pathway - plant+ko04626//Plant-pathogen interaction+ko04075//Plant hormone signal transduction;K13172//serine/arginine repetitive matrix protein 2;K22020//mucin-19;K13413//mitogen-activated protein kinase kinase 4/5 [EC:2.7.12.2]+ko04016//MAPK signaling pathway - plant+ko04626//Plant-pathogen interaction+ko0…	XP_020182160.1|1.8e-156|protein G1-like2 [Aegilops tauschii subsp. tauschii]	GO:2000112//regulation of cellular macromolecule biosynthetic process;GO:0050789//regulation of biological process;GO:0016070//RNA metabolic process;GO:1901576//organic substance biosynthetic process;GO:0009299//mRNA transcription;GO:0090304//nucleic acid metabolic process;GO:0034654//nucleobase-containing compound biosynthetic process;GO:0051171//regulation of nitrogen compound metabolic process…
TraesCS7A02G251300	5.47	6.37	3.46	4.39	6.71	6.23	10.29	13.72	12.82	13.34	12.66	14.85	1.26921	2.22181e-132	1.42207	1.68121e-173	1.08308	8.88909e-103	1.23594	1.61991e-139	1.25156	9.94163e-270		Triticum aestivum cDNA, clone: WT006_N16, cultivar: Chinese Spring	K13412//calcium-dependent protein kinase [EC:2.7.11.1]+ko04626//Plant-pathogen interaction;K08360//cytochrome b-561 [EC:1.16.5.1]	XP_004973918.1|8.2e-103|PREDICTED: uncharacterized protein LOC101763841 [Setaria italica]	GO:0044425//membrane part;GO:0016020//membrane;GO:0031224//intrinsic component of membrane;GO:0016021//integral component of membrane;
TraesCS3B02G406200	20.6	11.67	10.1	16.38	26.55	17.01	43.22	50.62	28.95	39.54	45.77	36.07	1.53138	0	1.52002	0	1.0324	0	1.02103	0	1.25596	0			K19891//glucan endo-1,3-beta-glucosidase 1/2/3 [EC:3.2.1.39]+ko00500//Starch and sucrose metabolism;K19891//glucan endo-1,3-beta-glucosidase 1/2/3 [EC:3.2.1.39]+ko00500//Starch and sucrose metabolism	CDM85083.1|1.1e-221|unnamed protein product [Triticum aestivum]
TraesCS1A02G186800	1.71	1.84	1.21	1.61	2.96	1.92	3.67	4.31	4.91	12.91	16.08	12.16	1.43899	1.08039e-35	3.12039	5.32211e-285	0.982296	3.8655e-20	2.6637	1.90694e-242	2.26186	5.57916e-264			K00799//glutathione S-transferase [EC:2.5.1.18]+ko00480//Glutathione metabolism	EMS55566.1|6.7e-119|putative glutathione S-transferase GSTU6 [Triticum urartu]
TraesCS7D02G186100	37.68	21.1	26.37	17.57	26.04	23.19	101.09	131.59	71.33	46.44	46.54	42.75	1.83915	0	0.678673	5.05437e-131	2.18251	0	1.02204	1.85969e-260	1.53673	0			K00891//shikimate kinase [EC:2.7.1.71]+ko01230//Biosynthesis of amino acids+ko01100//Metabolic pathways+ko01110//Biosynthesis of secondary metabolites+ko00400//Phenylalanine, tyrosine and tryptophan biosynthesis	XP_020198259.1|3.9e-161|shikimate kinase 2, chloroplastic-like [Aegilops tauschii subsp. tauschii]	GO:0044281//small molecule metabolic process;GO:0043436//oxoacid metabolic process;GO:0046394//carboxylic acid biosynthetic process;GO:0046417//chorismate metabolic process;GO:0006082//organic acid metabolic process;GO:0008152//metabolic process;GO:0009058//biosynthetic process;GO:1901576//organic substance biosynthetic process;GO:0009987//cellular process;GO:0016053//organic acid biosynthetic pr…
TraesCS2B02G166900	2.04	1.7	1.05	4.76	8.9	1.82	0.45	0.78	0.25	0.66	0.5	0.13	-1.69443	1.84305e-12	-1.69443	4.36743e-18	-3.38674	1.54926e-13	-3.38674	8.62531e-18	-2.6397	2.89305e-15			K13171//serine/arginine repetitive matrix protein 1+ko03015//mRNA surveillance pathway+ko03013//RNA transport;K14325//RNA-binding protein with serine-rich domain 1+ko03015//mRNA surveillance pathway+ko03013//RNA transport	BAJ94807.1|1.7e-107|predicted protein [Hordeum vulgare subsp. vulgare]	GO:0048731//system development;GO:0090693//plant organ senescence;GO:0006996//organelle organization;GO:0071840//cellular component organization or biogenesis;GO:0010256//endomembrane system organization;GO:0007568//aging;GO:0007275//multicellular organism development;GO:0048856//anatomical structure development;GO:0007029//endoplasmic reticulum organization;GO:0032502//developmental process;GO:0…	sp|Q9LVF4|DMP1_ARATH
TraesCS2B02G308500	40.96	21.95	19.41	26.29	43.53	26.24	83.69	114.75	59.77	45.9	57.36	44.38	1.6527	0	0.848442	1.05955e-290	1.42384	0	0.619577	6.62515e-168	1.18996	0			K05359//arogenate/prephenate dehydratase [EC:4.2.1.91 4.2.1.51]+ko01230//Biosynthesis of amino acids+ko01100//Metabolic pathways+ko01110//Biosynthesis of secondary metabolites+ko00400//Phenylalanine, tyrosine and tryptophan biosynthesis	EMS57591.1|3.3e-235|Arogenate dehydratase/prephenate dehydratase 6, chloroplastic [Triticum urartu]	GO:0044281//small molecule metabolic process;GO:0006807//nitrogen compound metabolic process;GO:0044283//small molecule biosynthetic process;GO:0016053//organic acid biosynthetic process;GO:1901576//organic substance biosynthetic process;GO:0071704//organic substance metabolic process;GO:0019752//carboxylic acid metabolic process;GO:0006082//organic acid metabolic process;GO:0043436//oxoacid meta…
TraesCS7B02G104600	8.96	7.59	5.37	8.89	15.11	14.21	35.04	42.91	22.19	22.3	17.33	21.6	2.10637	0	1.5031	0	1.29908	0	0.695817	3.98231e-146	1.38041	0			K01179//endoglucanase [EC:3.2.1.4]+ko01100//Metabolic pathways+ko00500//Starch and sucrose metabolism;K01179//endoglucanase [EC:3.2.1.4]+ko01100//Metabolic pathways+ko00500//Starch and sucrose metabolism;K01179//endoglucanase [EC:3.2.1.4]+ko01100//Metabolic pathways+ko00500//Starch and sucrose metabolism;K01179//endoglucanase [EC:3.2.1.4]+ko01100//Metabolic pathways+ko00500//Starch and sucrose me…	XP_020150705.1|1.0e-306|endoglucanase 16-like [Aegilops tauschii subsp. tauschii]	GO:0045229//external encapsulating structure organization;GO:0051275//beta-glucan catabolic process;GO:0008152//metabolic process;GO:1901575//organic substance catabolic process;GO:0044248//cellular catabolic process;GO:0030243//cellulose metabolic process;GO:0016043//cellular component organization;GO:0016052//carbohydrate catabolic process;GO:0005976//polysaccharide metabolic process;GO:0005975…
TraesCS6A02G279700	3.17	4.65	3.39	3.92	4.36	6.2	14.31	12.39	11.22	11.9	7.77	12.31	1.76266	1.02152e-179	1.51903	1.49534e-122	1.38581	1.39224e-126	1.14218	2.88772e-79	1.44695	3.48233e-247			K13412//calcium-dependent protein kinase [EC:2.7.11.1]+ko04626//Plant-pathogen interaction;K00430//peroxidase [EC:1.11.1.7]+ko01100//Metabolic pathways+ko01110//Biosynthesis of secondary metabolites+ko00940//Phenylpropanoid biosynthesis;K17987//next to BRCA1 gene 1 protein	XP_020172274.1|2.2e-93|uncharacterized protein LOC109757849 [Aegilops tauschii subsp. tauschii]
TraesCS7D02G549900	0	0	0	14.24	10.66	12.61	9.49	7.34	6.52	18.8	19.53	21.53	10.2368	4.9331e-96	11.6023	1.08154e-194	-0.694546	8.2768e-21	0.670918	3.53214e-30	1.1469	9.81873e-100				XP_020174486.1|2.5e-61|cold-shock protein CS120-like [Aegilops tauschii subsp. tauschii]
TraesCS1D02G429100	1.7	0.96	0.82	0.94	1.79	0.13	6.77	6.04	5.75	1.11	0.85	0.83	2.4276	2.05998e-19	-0.271248	0.529537	2.66539	2.78641e-21	-0.0334574	0.94082	1.75437	3.93917e-15				EMT15156.1|2.7e-37|hypothetical protein F775_01143 [Aegilops tauschii]
TraesCS7B02G376400	11.82	4.01	3.98	7.45	12.7	7.04	30.06	43.66	14.49	16.6	17.72	11.3	2.12131	0	1.31576	2.78774e-264	1.59803	0	0.792476	1.53551e-115	1.49252	0			K04733//interleukin-1 receptor-associated kinase 4 [EC:2.7.11.1];K04733//interleukin-1 receptor-associated kinase 4 [EC:2.7.11.1];K04733//interleukin-1 receptor-associated kinase 4 [EC:2.7.11.1];K04733//interleukin-1 receptor-associated kinase 4 [EC:2.7.11.1];K04733//interleukin-1 receptor-associated kinase 4 [EC:2.7.11.1];K04733//interleukin-1 receptor-associated kinase 4 [EC:2.7.11.1]	XP_020200998.1|4.1e-252|serine/threonine-protein kinase RIPK-like, partial [Aegilops tauschii subsp. tauschii]	GO:0016310//phosphorylation;GO:0044237//cellular metabolic process;GO:0044238//primary metabolic process;GO:0009987//cellular process;GO:0071704//organic substance metabolic process;GO:0023052//signaling;GO:0050789//regulation of biological process;GO:0044267//cellular protein metabolic process;GO:0019538//protein metabolic process;GO:0008152//metabolic process;GO:0006807//nitrogen compound metab…
TraesCS2A02G268800	1.66	1.05	0.81	1.35	2.06	1.27	2.89	2.83	2.12	2.41	3.43	2.77	1.15528	1.78319e-22	1.29413	6.6289e-29	0.741013	2.00783e-11	0.879858	4.28412e-16	1.00496	2.52585e-36			K06215//pyridoxal 5'-phosphate synthase pdxS subunit [EC:4.3.3.6]+ko00750//Vitamin B6 metabolism;K06215//pyridoxal 5'-phosphate synthase pdxS subunit [EC:4.3.3.6]+ko00750//Vitamin B6 metabolism	XP_015646521.1|1.8e-159|PREDICTED: probable pyridoxal 5'-phosphate synthase subunit PDX1.1 [Oryza sativa Japonica Group]	GO:0051188//cofactor biosynthetic process;GO:0006725//cellular aromatic compound metabolic process;GO:0072524//pyridine-containing compound metabolic process;GO:0042822//pyridoxal phosphate metabolic process;GO:0042823//pyridoxal phosphate biosynthetic process;GO:0006766//vitamin metabolic process;GO:1901564//organonitrogen compound metabolic process;GO:0090407//organophosphate biosynthetic proce…
TraesCS2D02G277600	1	1.24	1.11	1.44	1.4	1.6	4.97	5.21	6.03	1.45	1.29	1.47	2.27607	2.21857e-153	0.33409	0.00582874	1.86554	1.10378e-118	-0.0764466	0.499167	1.39629	3.29316e-99			K03327//multidrug resistance protein, MATE family	XP_020175487.1|1.1e-247|protein DETOXIFICATION 16-like isoform X1 [Aegilops tauschii subsp. tauschii]	GO:0015893//drug transport;GO:0051179//localization;GO:0042221//response to chemical;GO:0055085//transmembrane transport;GO:0006855//drug transmembrane transport;GO:0050896//response to stimulus;GO:0006810//transport;GO:0042493//response to drug;GO:0051234//establishment of localization;GO:0016020//membrane;GO:0031224//intrinsic component of membrane;GO:0044425//membrane part;GO:0016021//integral…
TraesCS6A02G256100	2.64	1.84	1.78	2.18	2.66	2.08	7.21	8.87	3.23	2.4	3.04	2.48	1.65097	3.05902e-107	0.362604	0.000116891	1.48838	4.77599e-92	0.200011	0.0292207	1.06669	1.4197e-77				XP_020196520.1|1.0e-177|F-box protein PP2-A13-like isoform X1 [Aegilops tauschii subsp. tauschii]
TraesCS5B02G146600	7.32	3.54	4.25	25.97	54.55	24.19	61.77	89.88	41.13	42.36	53.06	25.75	3.67858	0	3.01614	0	0.873176	1.87158e-158	0.210737	8.7714e-09	1.39398	0				XP_020192576.1|2.0e-40|uncharacterized protein LOC109778431 [Aegilops tauschii subsp. tauschii]
TraesCS1A02G076200	4.64	2.75	2.68	2.3	2.21	2.18	7.14	9.7	7.33	5.78	4.86	4.88	1.26486	8.90768e-78	0.629165	1.11686e-16	1.84778	1.5093e-133	1.21208	4.86839e-47	1.24457	5.62186e-123	MYB		K09422//transcription factor MYB, plant	XP_020164818.1|4.2e-183|transcription factor MYB30-like [Aegilops tauschii subsp. tauschii]
TraesCS7D02G173500	1.09	1.34	0.92	1.22	1.31	1.75	5.48	3.44	3.11	1.58	1.52	2.72	1.84809	1.11822e-68	0.795949	3.69574e-10	1.49018	8.56122e-51	0.438042	0.000251801	1.22989	5.10651e-56			K20506//tuliposide A-converting enzyme [EC:4.2.99.22];K17872//NADH:ubiquinone reductase (non-electrogenic) [EC:1.6.5.9]+ko00130//Ubiquinone and other terpenoid-quinone biosynthesis+ko01100//Metabolic pathways+ko01110//Biosynthesis of secondary metabolites;K13258//2-hydroxyisoflavanone dehydratase [EC:4.2.1.105]+ko01110//Biosynthesis of secondary metabolites+ko00943//Isoflavonoid biosynthesis	XP_003564101.1|1.2e-156|PREDICTED: 2-hydroxyisoflavanone dehydratase [Brachypodium distachyon]	GO:0008152//metabolic process;GO:0009056//catabolic process;GO:0003824//catalytic activity;GO:0016787//hydrolase activity;
TraesCS3B02G052600	0.59	0.64	0.48	1.65	1.77	1.45	2.59	2.91	2.26	1.52	2.61	2.4	2.16856	1.65635e-141	1.91338	8.68699e-101	0.655512	3.19039e-23	0.400327	7.38765e-09	1.10432	1.15794e-97		Leucine-rich repeat protein kinase family protein (best arabidopsis hit)	K13437//receptor kinase-like protein+ko04626//Plant-pathogen interaction;K13428//LRR receptor-like serine/threonine-protein kinase EFR [EC:2.7.11.1]+ko04626//Plant-pathogen interaction;K20181//vacuolar protein sorting-associated protein 18;K13437//receptor kinase-like protein+ko04626//Plant-pathogen interaction;K13428//LRR receptor-like serine/threonine-protein kinase EFR [EC:2.7.11.1]+ko04626//P…	CDM80388.1|0.0e+00|unnamed protein product [Triticum aestivum]
TraesCS2A02G106500	4.57	2.92	2.2	4.9	7.88	5.21	12.52	17.92	8.49	13.63	12.9	9.14	2.01053	0	1.8859	0	1.11359	3.56845e-213	0.988964	1.5673e-160	1.43495	0			K12761//carbon catabolite-derepressing protein kinase [EC:2.7.11.1];K07198//5'-AMP-activated protein kinase, catalytic alpha subunit [EC:2.7.11.11]	AFR90219.1|1.8e-236|CBL-interacting protein kinase 29 [Triticum aestivum]
TraesCS4A02G389100	6.96	3.88	2.66	5.95	12.68	6.87	40.21	48.36	12.78	9.5	16.8	6.21	2.9154	0	1.27836	1.27605e-89	1.98941	0	0.352368	9.15816e-11	1.78836	0			K01674//carbonic anhydrase [EC:4.2.1.1]+ko00910//Nitrogen metabolism	XP_020170325.1|1.5e-152|alpha carbonic anhydrase 7-like [Aegilops tauschii subsp. tauschii]
TraesCS2A02G152200	4.6	2.62	2.43	4.97	9.9	6.68	18.3	21.43	8.76	9.67	8.47	5.16	2.33513	0	1.27985	2.32491e-97	1.1702	2.42559e-174	0.114924	0.0217148	1.21075	8.41508e-272			K20660//cytochrome P450 family 709	AAT68297.1|1.7e-298|cytochrome P450 CYP709C1 [Triticum aestivum]
TraesCS3D02G402300	4.93	5.21	2.81	4.43	4.77	5.98	14.51	15.11	9.42	14.36	12.12	16.31	1.60231	4.80723e-218	1.73206	2.16232e-264	1.37056	1.74753e-172	1.50031	2.47933e-214	1.54826	0		Medicago truncatula NBS resistance protein (MTR_4g055630) mRNA, complete cds	K14209//solute carrier family 36 (proton-coupled amino acid transporter);K14209//solute carrier family 36 (proton-coupled amino acid transporter)	XP_020156020.1|9.0e-280|amino acid permease 3-like [Aegilops tauschii subsp. tauschii]
TraesCS2D02G145200	5.04	3.79	4.65	5.19	8.02	6.61	0.54	0.69	0.3	1.01	1.63	1.28	-3.13922	6.50558e-31	-3.13922	3.86506e-46	-3.69535	1.05238e-25	-3.69535	4.35636e-23	-2.73862	2.36579e-45			K14325//RNA-binding protein with serine-rich domain 1+ko03015//mRNA surveillance pathway+ko03013//RNA transport;K13171//serine/arginine repetitive matrix protein 1+ko03015//mRNA surveillance pathway+ko03013//RNA transport;K13172//serine/arginine repetitive matrix protein 2	XP_020146612.1|8.0e-112|uncharacterized protein LOC109731846 [Aegilops tauschii subsp. tauschii]	GO:0006996//organelle organization;GO:0009987//cellular process;GO:0007029//endoplasmic reticulum organization;GO:0032502//developmental process;GO:0061025//membrane fusion;GO:0032501//multicellular organismal process;GO:0048856//anatomical structure development;GO:0090148//membrane fission;GO:0099402//plant organ development;GO:0010256//endomembrane system organization;GO:0071840//cellular compo…	sp|Q9LVF1|DMP2_ARATH
TraesCS3A02G122300	3.05	1.71	1.51	2.11	2.62	1.55	6.75	8.8	4.69	3.59	4.1	3.54	1.68023	4.61948e-194	0.8185	1.80894e-35	1.66199	3.34467e-190	0.800267	4.97928e-34	1.30631	4.06981e-206			K04733//interleukin-1 receptor-associated kinase 4 [EC:2.7.11.1];K04733//interleukin-1 receptor-associated kinase 4 [EC:2.7.11.1]	BAJ96779.1|0.0e+00|predicted protein [Hordeum vulgare subsp. vulgare]
TraesCS4A02G349700	3.02	0.86	0.88	9.07	13.99	7.37	23.67	29.14	7.06	4.28	6.1	2.13	3.66172	0	1.40747	7.84629e-25	0.971216	6.86306e-63	-1.28303	2.62439e-50	1.04896	5.72641e-86			K00799//glutathione S-transferase [EC:2.5.1.18]+ko00480//Glutathione metabolism	BAK01892.1|7.5e-115|predicted protein [Hordeum vulgare subsp. vulgare]	GO:0006575//cellular modified amino acid metabolic process;GO:0006518//peptide metabolic process;GO:0006749//glutathione metabolic process;GO:1901564//organonitrogen compound metabolic process;GO:0044237//cellular metabolic process;GO:0006807//nitrogen compound metabolic process;GO:0043603//cellular amide metabolic process;GO:0006790//sulfur compound metabolic process;GO:0008152//metabolic proces…
TraesCS1D02G080400	6.71	2.23	1.8	8.5	17.3	7.28	19.37	25.8	10.55	9.71	16.81	5.98	2.37876	0	1.60577	3.42764e-151	0.74968	7.68094e-77	-0.0233099	0.61498	1.01612	5.71649e-201			K00430//peroxidase [EC:1.11.1.7]+ko01100//Metabolic pathways+ko01110//Biosynthesis of secondary metabolites+ko00940//Phenylpropanoid biosynthesis	XP_020179032.1|2.2e-195|peroxidase 5-like [Aegilops tauschii subsp. tauschii]
TraesCS6B02G347800	5.15	2.17	2.76	1.97	3.76	2.14	5.98	7.91	6.17	9.37	13.79	5.65	0.992413	1.47595e-66	1.52022	7.13022e-183	1.34536	1.522e-106	1.87317	8.72046e-244	1.44354	1.85842e-285			K21374//7-deoxyloganetin glucosyltransferase [EC:2.4.1.324]	XP_020150461.1|1.1e-272|7-deoxyloganetin glucosyltransferase-like isoform X1 [Aegilops tauschii subsp. tauschii]
TraesCS2A02G430800	2.09	0.94	1.86	0.24	0.84	1.6	5.82	7	4.05	2.32	2.21	0.5	1.78769	3.61786e-45	0.0506803	0.768009	2.64671	4.86417e-72	0.909697	5.32702e-06	1.53561	4.20832e-47				XP_020152470.1|1.6e-26|non-specific lipid-transfer protein 4-like [Aegilops tauschii subsp. tauschii]
TraesCS1B02G274500	2.41	2.25	1.47	1.36	1.79	1.52	10.04	9.54	6.88	6.84	5.81	7.77	2.11353	1.70221e-247	1.73928	3.78513e-147	2.50272	2.55375e-301	2.12847	5.15063e-191	2.12027	0			K01051//pectinesterase [EC:3.1.1.11]+ko00040//Pentose and glucuronate interconversions+ko01100//Metabolic pathways	XP_020166640.1|0.0e+00|pectinesterase-like [Aegilops tauschii subsp. tauschii]	GO:0044237//cellular metabolic process;GO:0042545//cell wall modification;GO:0009056//catabolic process;GO:0044238//primary metabolic process;GO:0008152//metabolic process;GO:0044248//cellular catabolic process;GO:0045229//external encapsulating structure organization;GO:0009987//cellular process;GO:0043170//macromolecule metabolic process;GO:0016052//carbohydrate catabolic process;GO:0045488//pe…
TraesCS7B02G456300	4.8	3.5	1.7	7.7	19.45	6.44	25.16	35.91	16.81	5.8	12.29	2.51	2.96522	0	1.05314	1.68863e-77	1.21245	0	-0.699635	7.58588e-63	1.18653	0				EMS67724.1|3.4e-242|hypothetical protein TRIUR3_21605 [Triticum urartu]
TraesCS2B02G043700	1.25	0.42	0.38	2.22	5.89	2.55	3.85	6.21	1.49	4.73	7.61	3.61	2.43506	2.86843e-275	2.9412	0	0.0987414	0.0315732	0.604872	1.39343e-46	1.11627	4.29077e-220			K19613//leucine-rich repeat protein SHOC2;K15078//structure-specific endonuclease subunit SLX1 [EC:3.6.1.-];K19613//leucine-rich repeat protein SHOC2;K15078//structure-specific endonuclease subunit SLX1 [EC:3.6.1.-];K19613//leucine-rich repeat protein SHOC2;K15078//structure-specific endonuclease subunit SLX1 [EC:3.6.1.-]	EMS49548.1|5.2e-268|Putative disease resistance RPP13-like protein 1 [Triticum urartu]	GO:0009987//cellular process;GO:0007165//signal transduction;GO:0006952//defense response;GO:0050896//response to stimulus;GO:0050794//regulation of cellular process;GO:0006950//response to stress;GO:0065007//biological regulation;GO:0007154//cell communication;GO:0023052//signaling;GO:0050789//regulation of biological process;GO:0051716//cellular response to stimulus;GO:0005886//plasma membrane;…
TraesCS5D02G085500	7.44	6.89	7.65	7.7	8.2	8.22	23.85	31.91	21.18	8.79	11.91	6.07	1.7987	0	0.342324	3.16035e-15	1.59795	0	0.141568	0.000757533	1.14783	0			K00895//diphosphate-dependent phosphofructokinase [EC:2.7.1.90]+ko00010//Glycolysis / Gluconeogenesis+ko00030//Pentose phosphate pathway+ko01100//Metabolic pathways+ko00051//Fructose and mannose metabolism+ko01110//Biosynthesis of secondary metabolites;K00895//diphosphate-dependent phosphofructokinase [EC:2.7.1.90]+ko00010//Glycolysis / Gluconeogenesis+ko00030//Pentose phosphate pathway+ko01100//…	XP_004956505.1|2.1e-242|PREDICTED: pyrophosphate--fructose 6-phosphate 1-phosphotransferase subunit alpha-like [Setaria italica]	GO:0006796//phosphate-containing compound metabolic process;GO:0008152//metabolic process;GO:0006793//phosphorus metabolic process;GO:0019637//organophosphate metabolic process;GO:0006002//fructose 6-phosphate metabolic process;GO:0009987//cellular process;GO:0044237//cellular metabolic process;GO:0071704//organic substance metabolic process;GO:1901135//carbohydrate derivative metabolic process;G…
TraesCS1D02G122600	32.59	24.85	15.94	21.69	31.21	19.65	73.77	83.48	53.73	49.94	51.05	46.83	1.52765	0	1.01654	0	1.53695	0	1.02584	0	1.30083	0			K04733//interleukin-1 receptor-associated kinase 4 [EC:2.7.11.1];K14306//nuclear pore complex protein Nup62+ko03013//RNA transport;K13412//calcium-dependent protein kinase [EC:2.7.11.1]+ko04626//Plant-pathogen interaction;K03006//DNA-directed RNA polymerase II subunit RPB1 [EC:2.7.7.6]+ko03020//RNA polymerase	XP_020170118.1|3.1e-283|protein ALP1-like [Aegilops tauschii subsp. tauschii]
TraesCS5D02G333900	10.55	6.02	5.24	4.78	9.73	7.61	18.95	25.83	14	11.31	11.65	10.33	1.43489	2.49429e-151	0.618911	1.3572e-22	1.40493	5.84969e-146	0.588946	1.02525e-20	1.07136	1.66456e-149			K01771//1-phosphatidylinositol phosphodiesterase [EC:4.6.1.13]+ko00562//Inositol phosphate metabolism;K13412//calcium-dependent protein kinase [EC:2.7.11.1]+ko04626//Plant-pathogen interaction;K22020//mucin-19	XP_020155329.1|9.6e-187|uncharacterized protein LOC109740690 [Aegilops tauschii subsp. tauschii]	GO:0008152//metabolic process;GO:0006629//lipid metabolic process;GO:0044238//primary metabolic process;GO:0071704//organic substance metabolic process;GO:0003824//catalytic activity;GO:0042578//phosphoric ester hydrolase activity;GO:0008081//phosphoric diester hydrolase activity;GO:0016788//hydrolase activity, acting on ester bonds;GO:0016787//hydrolase activity;
TraesCS4B02G303700	3.42	0.41	0.25	2.11	3.88	1.76	14.14	18.83	3.6	1.71	4.81	0.78	3.16945	0	0.849751	6.8021e-14	2.23832	1.23388e-263	-0.0813798	0.400315	1.90165	1.26538e-257			K07893//Ras-related protein Rab-6A;K00850//6-phosphofructokinase 1 [EC:2.7.1.11]+ko00010//Glycolysis / Gluconeogenesis+ko00030//Pentose phosphate pathway+ko01230//Biosynthesis of amino acids+ko03018//RNA degradation+ko01100//Metabolic pathways+ko00052//Galactose metabolism+ko00051//Fructose and mannose metabolism+ko01110//Biosynthesis of secondary metabolites+ko01200//Carbon metabolism;K13412//ca…	EMS56378.1|1.4e-210|hypothetical protein TRIUR3_06439 [Triticum urartu]
TraesCSU02G001500	3.27	2.56	2.35	3.65	3.26	3.91	11.44	13.62	6.98	5.51	4.05	8.35	1.97109	0	1.1286	2.12677e-84	1.56568	9.63771e-247	0.723199	1.19688e-40	1.39714	0				EMS66940.1|0.0e+00|S-type anion channel SLAH2 [Triticum urartu]
TraesCS2D02G275600	1.42	0.58	0.98	0.95	1.77	0.37	6.03	9.41	3.23	3.72	3.45	1.76	2.6647	1.43898e-15	1.63564	4.37807e-05	2.55784	6.8923e-15	1.52879	0.000103783	2.189	4.05509e-18				KQJ82131.1|1.5e-22|hypothetical protein BRADI_5g06485 [Brachypodium distachyon]
TraesCS4A02G388900	19.55	10.81	7.9	16.09	31.73	18.33	65.15	81.73	27.87	35.48	45.69	23.37	2.19783	0	1.46043	1.18694e-305	1.39837	0	0.660979	1.1433e-83	1.42547	0			K01674//carbonic anhydrase [EC:4.2.1.1]+ko00910//Nitrogen metabolism	XP_020170325.1|1.1e-151|alpha carbonic anhydrase 7-like [Aegilops tauschii subsp. tauschii]
TraesCS6B02G006400	0.69	0.98	0.73	0.92	0.9	2.02	2.1	1.76	2.29	10.16	9.52	9.98	1.35985	6.26213e-42	3.63274	0	0.680391	2.57316e-14	2.95328	0	2.52028	0			K03006//DNA-directed RNA polymerase II subunit RPB1 [EC:2.7.7.6]+ko03020//RNA polymerase	BAK01220.1|0.0e+00|predicted protein [Hordeum vulgare subsp. vulgare]	GO:0044464//cell part;GO:0005794//Golgi apparatus;GO:0031090//organelle membrane;GO:0005773//vacuole;GO:0016020//membrane;GO:0043229//intracellular organelle;GO:0043231//intracellular membrane-bounded organelle;GO:0044444//cytoplasmic part;GO:0098805//whole membrane;GO:0044422//organelle part;GO:0044437//vacuolar part;GO:0044425//membrane part;GO:0005774//vacuolar membrane;GO:0044446//intracellul…
TraesCS1B02G197000	10.68	9.7	6.66	13.26	23.09	17.49	46.03	53.06	36.34	29.74	27.04	28.96	2.3275	0	1.66984	0	1.32768	0	0.670024	3.72783e-105	1.45532	0			K14306//nuclear pore complex protein Nup62+ko03013//RNA transport;K22020//mucin-19	XP_020176368.1|1.5e-210|uncharacterized protein LOC109761971 [Aegilops tauschii subsp. tauschii]	GO:0003824//catalytic activity;GO:0016787//hydrolase activity;
TraesCS2B02G097800	9.64	3.39	4.15	6.86	11.01	6.09	30.1	46.57	13.36	9.89	20.03	6.54	2.39441	0	1.09418	1.33323e-111	1.90934	0	0.609116	6.95426e-42	1.62824	0		Seven transmembrane MLO family protein (best arabidopsis hit); MLO domain containing protein, putative, expressed (best rice hit)	K08472//mlo protein	BAJ24153.1|3.4e-288|seven trans-membrane protein [Triticum aestivum]
TraesCSU02G198000	10.72	5.06	4.02	8.61	19.19	8.62	29.39	32.76	17.11	12.08	19.92	8.65	2.00702	1.5275e-254	1.05061	2.64863e-51	1.11542	9.36441e-108	0.159013	0.00792812	1.09803	1.92256e-158			K01870//isoleucyl-tRNA synthetase [EC:6.1.1.5]+ko00970//Aminoacyl-tRNA biosynthesis	EMS46182.1|1.6e-91|hypothetical protein TRIUR3_05228 [Triticum urartu]
TraesCS2A02G215000	3.52	3.36	1.9	2.87	4.9	1.72	8.61	15.73	6.7	7.74	9.83	2.92	1.82803	3.18663e-133	1.23583	1.83342e-50	1.70509	1.4541e-120	1.11289	8.90504e-43	1.50147	3.43e-166			K08901//photosystem II oxygen-evolving enhancer protein 3+ko01100//Metabolic pathways+ko00195//Photosynthesis	BAJ89010.1|5.8e-119|predicted protein, partial [Hordeum vulgare subsp. vulgare]
BGI_novel_G006409	2.24	0	1.08	0.69	2.46	0.21	3.67	3.69	0.72	1	4.76	0.74	1.28308	1.10863e-35	0.975851	3.14928e-19	1.2621	1.16303e-34	0.954874	1.61511e-18	1.12812	1.47966e-51			K04733//interleukin-1 receptor-associated kinase 4 [EC:2.7.11.1]
TraesCS1D02G372400	4.89	3.64	2.61	4.96	7.46	4.5	14.88	15.37	9.87	9.87	7.96	9.19	1.8521	2.46637e-237	1.28282	4.11449e-94	1.24221	3.53719e-132	0.672924	5.08795e-33	1.26163	2.3784e-225			K20716//mitogen-activated protein kinase kinase kinase 17/18+ko04016//MAPK signaling pathway - plant	XP_020158372.1|2.1e-217|mitogen-activated protein kinase kinase kinase NPK1-like [Aegilops tauschii subsp. tauschii]
TraesCS7B02G195400	2.03	1.31	1.92	0.37	0.38	0.32	4.17	3.31	4.94	0.86	0.64	0.92	1.1111	3.97275e-55	-0.836738	5.42791e-17	3.40433	1.94612e-226	1.45649	1.42298e-22	1.17658	2.92179e-75			K10256//omega-6 fatty acid desaturase / acyl-lipid omega-6 desaturase (Delta-12 desaturase) [EC:1.14.19.6 1.14.19.22]+ko01212//Fatty acid metabolism+ko01040//Biosynthesis of unsaturated fatty acids;K10256//omega-6 fatty acid desaturase / acyl-lipid omega-6 desaturase (Delta-12 desaturase) [EC:1.14.19.6 1.14.19.22]+ko01212//Fatty acid metabolism+ko01040//Biosynthesis of unsaturated fatty acids;K10…	XP_020182113.1|6.1e-42|fatty acid desaturase DES2-like isoform X2 [Aegilops tauschii subsp. tauschii]
TraesCS1D02G292700	8.9	5.72	6	4.45	6.01	4.03	16.98	27.14	21.94	8.13	10.65	6.23	1.68	0	0.283664	6.80369e-10	2.18426	0	0.787919	2.51671e-55	1.37767	0	WRKY		K13424//WRKY transcription factor 33+ko04016//MAPK signaling pathway - plant+ko04626//Plant-pathogen interaction	XP_020151292.1|1.2e-287|WRKY transcription factor WRKY24-like [Aegilops tauschii subsp. tauschii]
TraesCS6D02G021100	2.32	1.94	1.9	1.26	1.71	0.94	7.11	8.37	5.26	3.14	4.5	1.99	1.75261	7.37248e-130	0.650382	1.26454e-13	2.40738	2.52584e-193	1.30515	4.97789e-40	1.59664	1.19883e-165			K21374//7-deoxyloganetin glucosyltransferase [EC:2.4.1.324]	XP_020179310.1|8.1e-282|7-deoxyloganetin glucosyltransferase-like [Aegilops tauschii subsp. tauschii]
TraesCS1B02G062300	2.16	1.39	0.91	2.16	3.33	2.48	3.77	4.94	2.48	4.43	6.51	4.58	1.3331	9.37319e-57	1.80701	5.84258e-120	0.488185	1.89199e-11	0.962095	1.65269e-46	1.10645	6.18662e-99			K04733//interleukin-1 receptor-associated kinase 4 [EC:2.7.11.1];K04730//interleukin-1 receptor-associated kinase 1 [EC:2.7.11.1]	XP_020159646.1|0.0e+00|L-type lectin-domain containing receptor kinase IV.1-like [Aegilops tauschii subsp. tauschii]	GO:0016021//integral component of membrane;GO:0016020//membrane;GO:0044425//membrane part;GO:0031224//intrinsic component of membrane;GO:0030246//carbohydrate binding;GO:0017076//purine nucleotide binding;GO:0005488//binding;GO:0043167//ion binding;GO:0016772//transferase activity, transferring phosphorus-containing groups;GO:0016740//transferase activity;GO:0032555//purine ribonucleotide binding…
TraesCS5B02G108900	7.39	4.16	4.3	4.83	8.96	6.89	24.63	37.16	16.07	14.25	14.19	11.53	2.29919	0	1.33868	2.85787e-176	1.91174	0	0.95123	3.77316e-102	1.69459	0				XP_020197872.1|2.0e-190|serine/arginine repetitive matrix protein 1-like [Aegilops tauschii subsp. tauschii]	GO:0005515//protein binding;GO:0005488//binding;GO:0005516//calmodulin binding;
TraesCS4D02G229900	4.42	0.68	0.49	3.36	10.39	3.84	11.07	17.03	5.46	9.02	13.72	3.84	2.58813	0	2.2567	4.16563e-236	0.930153	2.33998e-81	0.598722	5.56934e-31	1.38142	1.12499e-270		PREDICTED: Vitis vinifera hypothetical protein LOC100249092 (LOC100249092), mRNA	K22020//mucin-19	XP_020189448.1|1.3e-242|U-box domain-containing protein 21-like [Aegilops tauschii subsp. tauschii]	GO:0016740//transferase activity;GO:0003824//catalytic activity;GO:0019787//ubiquitin-like protein transferase activity;GO:0140096//catalytic activity, acting on a protein;GO:0004842//ubiquitin-protein transferase activity;
TraesCS1A02G263900	4.44	4.26	3.2	2.61	3.09	2.41	13.36	13.59	11.23	10.85	8.32	12.75	1.68508	2.17167e-278	1.42643	5.54087e-182	2.23217	0	1.97352	1.41906e-285	1.80884	0			K01051//pectinesterase [EC:3.1.1.11]+ko00040//Pentose and glucuronate interconversions+ko01100//Metabolic pathways	XP_020166640.1|0.0e+00|pectinesterase-like [Aegilops tauschii subsp. tauschii]	GO:0045490//pectin catabolic process;GO:0045229//external encapsulating structure organization;GO:0042737//drug catabolic process;GO:0071555//cell wall organization;GO:0000272//polysaccharide catabolic process;GO:0005976//polysaccharide metabolic process;GO:0009056//catabolic process;GO:1901575//organic substance catabolic process;GO:0042545//cell wall modification;GO:0010393//galacturonan metabo…
TraesCS6D02G060200	5.09	1.8	1.82	2.71	6.43	2.66	9.7	12.52	7.31	13.18	19.37	7.39	1.86158	0	1.93643	0	1.419	1.96275e-263	1.49385	1.7804e-297	1.66211	0			K14638//solute carrier family 15 (peptide/histidine transporter), member 3/4;K14638//solute carrier family 15 (peptide/histidine transporter), member 3/4;K14638//solute carrier family 15 (peptide/histidine transporter), member 3/4	EMS47891.1|0.0e+00|Peptide transporter PTR2 [Triticum urartu]	GO:0016021//integral component of membrane;GO:0016020//membrane;GO:0044425//membrane part;GO:0031224//intrinsic component of membrane;GO:0005215//transporter activity;
TraesCS7D02G085100	6.11	3.41	3.4	3.63	4.76	3.52	16.43	16.6	8.24	3.2	5.77	2.35	1.70262	1.89632e-188	-0.154926	0.0542344	1.79148	3.42083e-201	-0.0660668	0.420022	1.10289	1.18444e-124			K01674//carbonic anhydrase [EC:4.2.1.1]+ko00910//Nitrogen metabolism;K01674//carbonic anhydrase [EC:4.2.1.1]+ko00910//Nitrogen metabolism;K01674//carbonic anhydrase [EC:4.2.1.1]+ko00910//Nitrogen metabolism	XP_020170328.1|4.2e-159|alpha carbonic anhydrase 7-like [Aegilops tauschii subsp. tauschii]
BGI_novel_G001337	0.2	0.18	0.21	2.22	1.29	2.14	2.07	0.79	1.85	2.45	2.43	3.69	3.00741	2.04419e-18	3.88281	2.74754e-39	-0.282711	0.146507	0.592681	0.000413225	1.08288	1.57274e-13
TraesCS1A02G104100	1.67	1.98	0.95	0.51	0.6	0.6	7.11	12.52	6.91	2.31	3.68	2.6	2.5332	2.73458e-255	0.906671	4.06602e-20	3.95908	0	2.33255	1.00285e-75	2.48299	0			K00430//peroxidase [EC:1.11.1.7]+ko01100//Metabolic pathways+ko01110//Biosynthesis of secondary metabolites+ko00940//Phenylpropanoid biosynthesis;K00430//peroxidase [EC:1.11.1.7]+ko01100//Metabolic pathways+ko01110//Biosynthesis of secondary metabolites+ko00940//Phenylpropanoid biosynthesis	XP_020167323.1|6.0e-182|peroxidase N-like [Aegilops tauschii subsp. tauschii]	GO:0006950//response to stress;GO:0051186//cofactor metabolic process;GO:0042743//hydrogen peroxide metabolic process;GO:0072593//reactive oxygen species metabolic process;GO:0009056//catabolic process;GO:0044248//cellular catabolic process;GO:0017144//drug metabolic process;GO:0042737//drug catabolic process;GO:0006979//response to oxidative stress;GO:0009987//cellular process;GO:0042744//hydrog…
TraesCS2A02G182400	1.8	1.11	1	1.27	1.42	1.41	5.02	6.86	3.08	4.66	4.19	3.46	1.93679	1.61721e-248	1.65544	2.21761e-164	1.86925	6.09128e-236	1.5879	3.33386e-154	1.76984	0		Hordeum vulgare subsp. vulgare mRNA for predicted protein, partial cds, clone: NIASHv2090G08	K13415//protein brassinosteroid insensitive 1 [EC:2.7.10.1 2.7.11.1]+ko04075//Plant hormone signal transduction	XP_020177380.1|0.0e+00|probable LRR receptor-like serine/threonine-protein kinase At1g74360 [Aegilops tauschii subsp. tauschii]	GO:0005737//cytoplasm;GO:0044424//intracellular part;GO:0044425//membrane part;GO:0005739//mitochondrion;GO:0005623//cell;GO:0043229//intracellular organelle;GO:0043226//organelle;GO:0044464//cell part;GO:0016020//membrane;GO:0043227//membrane-bounded organelle;GO:0016021//integral component of membrane;GO:0005622//intracellular;GO:0031224//intrinsic component of membrane;GO:0043231//intracellula…
TraesCS1D02G316400	2.21	0.7	1.11	1.64	3.12	1.16	3.47	3.89	1.53	4.88	5.05	1.59	1.14989	2.20941e-13	1.53198	2.24676e-25	0.581694	4.40933e-05	0.963781	5.64592e-13	1.04179	1.25745e-24			K03006//DNA-directed RNA polymerase II subunit RPB1 [EC:2.7.7.6]+ko03020//RNA polymerase	XP_020160947.1|1.8e-84|mavicyanin-like [Aegilops tauschii subsp. tauschii]
TraesCS3D02G173300	13.17	10.16	8.61	13.01	22.23	12.94	31.39	35.01	28.07	23.25	25.02	19.32	1.56669	0	1.08695	1.08654e-266	0.968284	1.26448e-307	0.488549	1.87412e-67	1.01957	0	WRKY		K13424//WRKY transcription factor 33+ko04016//MAPK signaling pathway - plant+ko04626//Plant-pathogen interaction;K13424//WRKY transcription factor 33+ko04016//MAPK signaling pathway - plant+ko04626//Plant-pathogen interaction	XP_020186071.1|0.0e+00|WRKY transcription factor 6-like [Aegilops tauschii subsp. tauschii]
TraesCS3D02G105500	1.15	1.42	0.48	1.33	2.63	1.33	3.97	7.01	6.29	2.2	2.5	3.37	2.50209	4.26272e-113	1.40769	1.00176e-25	1.69925	2.57331e-69	0.604842	2.39764e-07	1.60487	2.77641e-93			K13412//calcium-dependent protein kinase [EC:2.7.11.1]+ko04626//Plant-pathogen interaction;K00430//peroxidase [EC:1.11.1.7]+ko01100//Metabolic pathways+ko01110//Biosynthesis of secondary metabolites+ko00940//Phenylpropanoid biosynthesis	XP_020191633.1|2.5e-141|fasciclin-like arabinogalactan protein 11 [Aegilops tauschii subsp. tauschii]
TraesCS7D02G204200	24.3	15.12	13.04	13.1	21.38	13.81	60.76	77.56	49.66	29.52	26.83	28.72	1.84551	0	0.70711	8.03324e-58	1.95358	0	0.815187	3.67787e-73	1.44199	0	Tify		K13464//jasmonate ZIM domain-containing protein+ko04075//Plant hormone signal transduction	XP_020156642.1|1.5e-71|protein TIFY 11e-like [Aegilops tauschii subsp. tauschii]
TraesCS5B02G468400	30	15.4	12.88	10.74	23.27	16.29	149.69	207.9	122.26	43.2	61.84	37	3.04638	0	1.26794	0	3.25278	0	1.47434	0	2.51945	0			K10775//phenylalanine ammonia-lyase [EC:4.3.1.24]+ko01100//Metabolic pathways+ko01110//Biosynthesis of secondary metabolites+ko00940//Phenylpropanoid biosynthesis+ko00360//Phenylalanine metabolism;K10775//phenylalanine ammonia-lyase [EC:4.3.1.24]+ko01100//Metabolic pathways+ko01110//Biosynthesis of secondary metabolites+ko00940//Phenylpropanoid biosynthesis+ko00360//Phenylalanine metabolism	XP_020173226.1|1.1e-291|phenylalanine ammonia-lyase-like [Aegilops tauschii subsp. tauschii]	GO:0009698//phenylpropanoid metabolic process;GO:0019438//aromatic compound biosynthetic process;GO:0009074//aromatic amino acid family catabolic process;GO:0071704//organic substance metabolic process;GO:0044237//cellular metabolic process;GO:0008152//metabolic process;GO:1901605//alpha-amino acid metabolic process;GO:0009800//cinnamic acid biosynthetic process;GO:1902221//erythrose 4-phosphate/…
TraesCS6A02G268500	11.04	4.84	5.05	6.46	12.32	6.22	23.1	37.08	19.08	10.89	16.06	7.06	1.92288	0	0.706595	5.03057e-64	1.662	0	0.445717	9.78688e-29	1.30721	0			K14638//solute carrier family 15 (peptide/histidine transporter), member 3/4	XP_020146710.1|0.0e+00|protein NRT1/ PTR FAMILY 8.3-like [Aegilops tauschii subsp. tauschii]
TraesCS4A02G033500	65.56	34.36	26.93	50.99	100.96	52.65	179.61	217.41	119.03	89.56	127.29	66.85	2.0293	0	1.17186	0	1.32934	0	0.471901	3.33879e-110	1.27561	0			K03006//DNA-directed RNA polymerase II subunit RPB1 [EC:2.7.7.6]+ko03020//RNA polymerase;K01183//chitinase [EC:3.2.1.14]+ko00520//Amino sugar and nucleotide sugar metabolism+ko01100//Metabolic pathways	XP_020193259.1|1.3e-87|mavicyanin-like [Aegilops tauschii subsp. tauschii]
TraesCS2A02G216200	2.99	4.24	1.32	1.91	4.66	1.98	14.81	24.73	16.49	13.82	13.81	11.86	2.71746	0	2.21592	0	2.70774	0	2.2062	0	2.4851	0			K19891//glucan endo-1,3-beta-glucosidase 1/2/3 [EC:3.2.1.39]+ko00500//Starch and sucrose metabolism	EMS51674.1|0.0e+00|Glucan endo-1,3-beta-glucosidase 13 [Triticum urartu]
TraesCS7D02G152000	1.56	0.54	0.67	0.7	4.08	1.51	7.63	10.25	3.87	3.82	7.07	2.08	2.97546	7.89709e-194	2.23503	3.316e-85	1.78654	6.36048e-106	1.04611	3.1401e-29	1.94359	2.3222e-188			K13065//shikimate O-hydroxycinnamoyltransferase [EC:2.3.1.133]+ko01100//Metabolic pathways+ko01110//Biosynthesis of secondary metabolites+ko00940//Phenylpropanoid biosynthesis+ko00941//Flavonoid biosynthesis+ko00945//Stilbenoid, diarylheptanoid and gingerol biosynthesis	XP_020167848.1|2.0e-248|hydroxycinnamoyltransferase 4-like [Aegilops tauschii subsp. tauschii]	GO:0016740//transferase activity;GO:0003824//catalytic activity;GO:0016746//transferase activity, transferring acyl groups;GO:0016747//transferase activity, transferring acyl groups other than amino-acyl groups;
TraesCS4D02G130600	0.79	1.07	0.59	1.3	1.31	0.95	3.38	2.38	2.58	2.07	2.07	2.06	1.77073	4.24478e-89	1.27022	2.44556e-39	1.28767	3.88099e-56	0.787161	1.13698e-18	1.28313	4.97038e-94			K03695//ATP-dependent Clp protease ATP-binding subunit ClpB;K03695//ATP-dependent Clp protease ATP-binding subunit ClpB;K03695//ATP-dependent Clp protease ATP-binding subunit ClpB	XP_020168048.1|0.0e+00|protein DWARF 53-like [Aegilops tauschii subsp. tauschii]	GO:0044238//primary metabolic process;GO:0008152//metabolic process;GO:0019538//protein metabolic process;GO:0006807//nitrogen compound metabolic process;GO:0043170//macromolecule metabolic process;GO:0071704//organic substance metabolic process;GO:1901564//organonitrogen compound metabolic process;
TraesCS7B02G106400	2.99	0.85	1.09	1.82	4.91	1.38	8.92	13.15	5.28	3.12	3.99	1.14	2.47759	1.61658e-119	0.75606	1.54351e-07	1.74723	6.85047e-77	0.0257047	0.839933	1.45534	4.01874e-77				BAJ95531.1|3.5e-33|predicted protein [Hordeum vulgare subsp. vulgare]
TraesCS6B02G212700	3.4	2.84	2.99	3.04	3.04	3.7	5.8	6.22	4.77	8.97	7.99	10.87	0.864279	1.33499e-79	1.59341	0	0.779544	1.1177e-66	1.50868	0	1.22938	0		Leucine-rich repeat protein kinase family protein (best arabidopsis hit); receptor-like protein kinase precursor, putative, expressed (best rice hit)	K13437//receptor kinase-like protein+ko04626//Plant-pathogen interaction;K13420//LRR receptor-like serine/threonine-protein kinase FLS2 [EC:2.7.11.1]+ko04016//MAPK signaling pathway - plant+ko04626//Plant-pathogen interaction;K13437//receptor kinase-like protein+ko04626//Plant-pathogen interaction;K13420//LRR receptor-like serine/threonine-protein kinase FLS2 [EC:2.7.11.1]+ko04016//MAPK signaling…	XP_020174448.1|0.0e+00|receptor kinase-like protein Xa21 [Aegilops tauschii subsp. tauschii]
TraesCS3A02G297100	6.2	3.87	4.54	6.05	9.76	4.79	30.89	31.59	37	12.3	17.55	10.08	2.76573	0	1.45657	3.37835e-146	2.26342	0	0.954262	2.8276e-75	1.98697	0			K00430//peroxidase [EC:1.11.1.7]+ko01100//Metabolic pathways+ko01110//Biosynthesis of secondary metabolites+ko00940//Phenylpropanoid biosynthesis;K00430//peroxidase [EC:1.11.1.7]+ko01100//Metabolic pathways+ko01110//Biosynthesis of secondary metabolites+ko00940//Phenylpropanoid biosynthesis	EMS48400.1|3.1e-196|Peroxidase 2 [Triticum urartu]
TraesCS5A02G330500	15.57	11.85	8.08	14.36	21.14	16.85	40.18	58.23	24.47	19.74	24.65	18.56	1.79546	0	0.833604	8.0488e-251	1.23212	0	0.270264	1.66862e-33	1.08851	0			K04733//interleukin-1 receptor-associated kinase 4 [EC:2.7.11.1];K04733//interleukin-1 receptor-associated kinase 4 [EC:2.7.11.1]	XP_020194829.1|0.0e+00|receptor-like protein kinase FERONIA [Aegilops tauschii subsp. tauschii]	GO:0044425//membrane part;GO:0016021//integral component of membrane;GO:0016020//membrane;GO:0031224//intrinsic component of membrane;GO:1901363//heterocyclic compound binding;GO:0032555//purine ribonucleotide binding;GO:0003824//catalytic activity;GO:1901265//nucleoside phosphate binding;GO:0036094//small molecule binding;GO:0004672//protein kinase activity;GO:0043168//anion binding;GO:0032553//…
TraesCS5A02G460500	2.51	0.47	0.79	2.32	5.69	1.41	5.9	10.72	2.53	2.51	5.36	0.93	2.35035	4.94507e-134	1.23589	1.79988e-26	1.02273	2.62477e-41	-0.0917315	0.321065	1.09305	2.71743e-66			K00679//phospholipid:diacylglycerol acyltransferase [EC:2.3.1.158]+ko01100//Metabolic pathways+ko00561//Glycerolipid metabolism;K10691//E3 ubiquitin-protein ligase UBR4 [EC:2.3.2.27];K14209//solute carrier family 36 (proton-coupled amino acid transporter);K21026//acetylajmaline esterase [EC:3.1.1.80]	XP_020175799.1|2.4e-196|GDSL esterase/lipase At5g55050-like [Aegilops tauschii subsp. tauschii]	GO:0016788//hydrolase activity, acting on ester bonds;GO:0016787//hydrolase activity;GO:0003824//catalytic activity;
TraesCS5B02G322900	1.07	1.45	0.78	0.95	2.1	0.84	4.54	8.1	4.09	2.27	1.6	0.86	2.34872	6.85919e-105	0.531332	0.000343684	2.0978	4.23936e-91	0.28041	0.0490101	1.58383	4.05572e-80			K08913//light-harvesting complex II chlorophyll a/b binding protein 2+ko01100//Metabolic pathways+ko00196//Photosynthesis - antenna proteins	XP_003562323.1|2.3e-150|PREDICTED: chlorophyll a-b binding protein, chloroplastic [Brachypodium distachyon]	GO:0009987//cellular process;GO:0015979//photosynthesis;GO:0071704//organic substance metabolic process;GO:0009416//response to light stimulus;GO:0008152//metabolic process;GO:1901564//organonitrogen compound metabolic process;GO:0006091//generation of precursor metabolites and energy;GO:0044267//cellular protein metabolic process;GO:0044237//cellular metabolic process;GO:0044260//cellular macrom…
TraesCS3A02G041700	21.57	18.22	17.05	18.6	21.58	19.26	50.1	51.67	42.1	41.43	43.89	36.65	1.34221	0	1.10909	1.06745e-230	1.26921	0	1.03609	1.01593e-205	1.1943	0			K13171//serine/arginine repetitive matrix protein 1+ko03015//mRNA surveillance pathway+ko03013//RNA transport;K14325//RNA-binding protein with serine-rich domain 1+ko03015//mRNA surveillance pathway+ko03013//RNA transport	XP_020189647.1|2.4e-98|uncharacterized protein LOC109775309 [Aegilops tauschii subsp. tauschii]
TraesCS7A02G479300	3.44	1.57	1.65	2.35	4.29	1.41	8.39	13.25	5.46	2.01	4.87	0.91	2.02956	2.27485e-110	0.238106	0.0556321	1.74512	5.49171e-90	-0.0463372	0.69629	1.25216	1.97579e-71			K03006//DNA-directed RNA polymerase II subunit RPB1 [EC:2.7.7.6]+ko03020//RNA polymerase	EMS50589.1|5.3e-166|hypothetical protein TRIUR3_03715 [Triticum urartu]	GO:0031224//intrinsic component of membrane;GO:0016021//integral component of membrane;GO:0044425//membrane part;GO:0016020//membrane;
TraesCS7D02G386500	21	10.79	7.96	13.25	25.81	21.96	82.68	106.89	50.43	41.1	50.93	33.14	2.59697	0	1.65855	0	1.97695	0	1.03853	0	1.86401	0		Hordeum vulgare subsp. vulgare mRNA for predicted protein, complete cds, clone: NIASHv2100P20	K05681//ATP-binding cassette, subfamily G (WHITE), member 2+ko02010//ABC transporters	XP_020186107.1|0.0e+00|ABC transporter G family member 44-like [Aegilops tauschii subsp. tauschii]
TraesCS7D02G132400	6.89	6.77	5.5	5.58	6.13	6.01	14.73	15.29	15.74	9.79	7.67	15.22	1.25779	9.76155e-130	0.774157	1.45378e-42	1.36246	7.56849e-146	0.878825	3.1864e-52	1.0888	2.73421e-175			K13172//serine/arginine repetitive matrix protein 2	XP_020181008.1|2.2e-138|uncharacterized protein LOC109766650 [Aegilops tauschii subsp. tauschii]
TraesCS7B02G462700	1.73	1.21	1.61	1.96	2.9	2.88	22.27	17.05	16.38	1.6	1.3	1.78	3.61601	0	0.0100659	0.92916	2.84309	0	-0.762858	1.53523e-14	2.30179	0			K04733//interleukin-1 receptor-associated kinase 4 [EC:2.7.11.1];K04733//interleukin-1 receptor-associated kinase 4 [EC:2.7.11.1];K04733//interleukin-1 receptor-associated kinase 4 [EC:2.7.11.1];K04733//interleukin-1 receptor-associated kinase 4 [EC:2.7.11.1]	XP_020165057.1|9.7e-187|putative receptor-like protein kinase At4g00960 [Aegilops tauschii subsp. tauschii]
TraesCS5B02G132500	1.36	1.13	0.84	1.66	2.18	1.45	3.66	3.78	4.86	2.12	1.96	2.03	1.88382	2.9303e-138	0.876785	1.78122e-22	1.21406	5.27644e-73	0.207025	0.00987532	1.09766	1.17275e-92			K11267//sister chromatid cohesion protein PDS5	XP_020197180.1|0.0e+00|uncharacterized protein LOC109782960 [Aegilops tauschii subsp. tauschii]	GO:0007154//cell communication;GO:0051716//cellular response to stimulus;GO:0065007//biological regulation;GO:0050896//response to stimulus;GO:0007165//signal transduction;GO:0023052//signaling;GO:0009987//cellular process;GO:0050794//regulation of cellular process;GO:0050789//regulation of biological process;GO:0031224//intrinsic component of membrane;GO:0016021//integral component of membrane;G…
TraesCS4D02G021300	2.89	2.51	2.17	2.64	2.5	2.67	10.32	11.78	9.5	8.32	4.81	7.76	2.06588	2.57603e-192	1.47107	5.10973e-80	2.01103	6.31201e-185	1.41622	2.47136e-75	1.77322	8.40803e-259			K20893//probable galacturonosyltransferase-like 1 [EC:2.4.1.-]	XP_020149617.1|1.2e-203|probable galacturonosyltransferase-like 1 [Aegilops tauschii subsp. tauschii]	GO:0071704//organic substance metabolic process;GO:1901576//organic substance biosynthetic process;GO:0005976//polysaccharide metabolic process;GO:0016051//carbohydrate biosynthetic process;GO:0009059//macromolecule biosynthetic process;GO:0005975//carbohydrate metabolic process;GO:0009058//biosynthetic process;GO:0044238//primary metabolic process;GO:0043170//macromolecule metabolic process;GO:0…
TraesCS6B02G274800	11.79	6.69	5.42	4.38	9.28	6.67	28.1	36.01	17.91	12.84	14.92	10.73	1.78459	6.9775e-303	0.697361	3.43838e-33	2.00776	0	0.92054	3.22103e-52	1.45108	0			K00930//acetylglutamate kinase [EC:2.7.2.8]+ko00220//Arginine biosynthesis+ko01230//Biosynthesis of amino acids+ko01100//Metabolic pathways+ko01110//Biosynthesis of secondary metabolites+ko01210//2-Oxocarboxylic acid metabolism	XP_020176979.1|3.7e-181|uncharacterized protein LOC109762529 [Aegilops tauschii subsp. tauschii]	GO:1901607//alpha-amino acid biosynthetic process;GO:1901566//organonitrogen compound biosynthetic process;GO:0006525//arginine metabolic process;GO:1901564//organonitrogen compound metabolic process;GO:0044283//small molecule biosynthetic process;GO:0009058//biosynthetic process;GO:0006520//cellular amino acid metabolic process;GO:0016053//organic acid biosynthetic process;GO:0044238//primary me…
TraesCS6D02G244000	2.7	3.16	1.48	3.37	3.35	3.09	8.92	12.43	5.11	5.44	3.41	5.94	1.85587	8.67443e-127	1.01688	1.13034e-29	1.42809	2.85463e-87	0.5891	1.90628e-12	1.27042	2.95991e-113			K02184//formin 2;K03006//DNA-directed RNA polymerase II subunit RPB1 [EC:2.7.7.6]+ko03020//RNA polymerase	XP_020192909.1|3.0e-113|uncharacterized protein LOC109778744 [Aegilops tauschii subsp. tauschii]	GO:0016020//membrane;GO:0031224//intrinsic component of membrane;GO:0016021//integral component of membrane;GO:0044425//membrane part;
BGI_novel_G002014	7.98	8.69	6.26	9.68	9.78	7.81	46.45	67.03	39.42	11.07	11.38	10.79	2.74055	0	0.5406	1.66049e-32	2.48418	0	0.284228	7.54005e-11	1.89723	0			K01807//ribose 5-phosphate isomerase A [EC:5.3.1.6]+ko00030//Pentose phosphate pathway+ko01230//Biosynthesis of amino acids+ko01100//Metabolic pathways+ko01110//Biosynthesis of secondary metabolites+ko00710//Carbon fixation in photosynthetic organisms+ko01200//Carbon metabolism		GO:0034641//cellular nitrogen compound metabolic process;GO:0006753//nucleoside phosphate metabolic process;GO:0009052//pentose-phosphate shunt, non-oxidative branch;GO:0006733//oxidoreduction coenzyme metabolic process;GO:0009987//cellular process;GO:0051156//glucose 6-phosphate metabolic process;GO:1901564//organonitrogen compound metabolic process;GO:0071704//organic substance metabolic proces…
BGI_novel_G008146	2.25	2.14	2	2.32	2.76	2.83	3.22	2.84	4.04	7.14	5.7	7.71	0.66046	3.54603e-06	1.69589	9.11402e-46	0.340608	0.0116944	1.37604	5.78165e-34	1.09798	1.80473e-35			K07466//replication factor A1+ko03420//Nucleotide excision repair+ko03030//DNA replication+ko03440//Homologous recombination+ko03430//Mismatch repair;K12885//heterogeneous nuclear ribonucleoprotein G+ko03040//Spliceosome
TraesCS2B02G242500	3.49	1.86	2.06	1.73	3.49	1.49	6.31	9.89	4.33	2.71	4.05	1.19	1.47284	5.81182e-155	0.10778	0.126745	1.61395	4.59452e-176	0.248889	0.000597282	1.01859	1.49293e-120		Hordeum vulgare subsp. vulgare mRNA for predicted protein, complete cds, clone: NIASHv2005G16	K04733//interleukin-1 receptor-associated kinase 4 [EC:2.7.11.1]	XP_020199783.1|0.0e+00|putative cysteine-rich receptor-like protein kinase 20 [Aegilops tauschii subsp. tauschii]	GO:0016021//integral component of membrane;GO:0031224//intrinsic component of membrane;GO:0044425//membrane part;GO:0016020//membrane;GO:0032555//purine ribonucleotide binding;GO:0097159//organic cyclic compound binding;GO:0000166//nucleotide binding;GO:0016773//phosphotransferase activity, alcohol group as acceptor;GO:0043168//anion binding;GO:0043167//ion binding;GO:0003824//catalytic activity;…
TraesCS3A02G114900	6.06	4.1	3.35	3.77	6.95	4.62	8.87	8.82	8.27	10.59	11.93	10.13	0.960365	4.02731e-92	1.28737	2.87945e-182	0.76013	3.492e-62	1.08714	3.91648e-139	1.02897	2.44951e-228			K20279//synaptojanin [EC:3.1.3.36]+ko01100//Metabolic pathways+ko04070//Phosphatidylinositol signaling system+ko00562//Inositol phosphate metabolism;K20279//synaptojanin [EC:3.1.3.36]+ko01100//Metabolic pathways+ko04070//Phosphatidylinositol signaling system+ko00562//Inositol phosphate metabolism	XP_020153876.1|0.0e+00|type I inositol polyphosphate 5-phosphatase 1-like [Aegilops tauschii subsp. tauschii]	GO:0019637//organophosphate metabolic process;GO:0046486//glycerolipid metabolic process;GO:0044255//cellular lipid metabolic process;GO:0046488//phosphatidylinositol metabolic process;GO:0006796//phosphate-containing compound metabolic process;GO:0008152//metabolic process;GO:0006793//phosphorus metabolic process;GO:0071704//organic substance metabolic process;GO:0044238//primary metabolic proce…
TraesCS2D02G200700	1.67	2.04	1.32	0.73	1.53	0.35	5.5	11.4	7.26	5.74	6.47	3.04	2.26646	7.91394e-158	1.60952	3.79011e-64	3.20458	6.05204e-226	2.54764	4.97695e-114	2.36906	2.37296e-269			K08908//light-harvesting complex I chlorophyll a/b binding protein 2+ko00196//Photosynthesis - antenna proteins	EMT28434.1|1.8e-148|hypothetical protein F775_43774 [Aegilops tauschii]	GO:0006807//nitrogen compound metabolic process;GO:0018298//protein-chromophore linkage;GO:1901564//organonitrogen compound metabolic process;GO:0044260//cellular macromolecule metabolic process;GO:0008152//metabolic process;GO:0044237//cellular metabolic process;GO:0043412//macromolecule modification;GO:0006464//cellular protein modification process;GO:0071704//organic substance metabolic proces…
TraesCS7B02G103900	1.83	1.53	1.2	1.48	2.98	1.4	5.07	6.68	2.98	1.73	3.04	1.39	1.69326	9.46415e-69	0.437917	0.000278344	1.32746	2.73556e-48	0.0721159	0.524656	1.00816	2.24006e-44			K13420//LRR receptor-like serine/threonine-protein kinase FLS2 [EC:2.7.11.1]+ko04016//MAPK signaling pathway - plant+ko04626//Plant-pathogen interaction	CAP07571.1|3.9e-191|putative polygalacturonase-inhibiting protein 1 precursor [Triticum turgidum subsp. durum]
TraesCS6D02G002000	3.26	3.23	1.85	0.02	0.11	0	8.24	7.31	6.39	0.03	0	0	1.40747	5.68661e-66	-8.53428	1.47861e-76	6.97868	4.08675e-229	-2.96307	0.0145842	1.38141	2.72745e-64				EMS58741.1|5.5e-83|hypothetical protein TRIUR3_34830 [Triticum urartu]
TraesCS7B02G345600	15.68	14.46	13.69	5.47	5.65	5.86	28.55	34.01	24.77	30.28	24.43	45.15	0.997111	1.38041e-138	1.19273	8.02935e-210	2.35648	0	2.5521	0	1.61977	0				XP_020173387.1|2.9e-43|uncharacterized protein LOC109758935 [Aegilops tauschii subsp. tauschii]
TraesCS4B02G210900	0.96	1.09	1.07	0.99	0.83	1.25	2.45	2.31	1.21	2.24	2.65	2.27	0.953734	5.11873e-21	1.22734	1.06826e-36	0.966159	2.40198e-21	1.23977	4.38213e-37	1.10232	1.52105e-55	LIM	LIM domain-containing protein, putative, expressed (best arabidopsis hit)	K17964//leucine-rich PPR motif-containing protein, mitochondrial;K17964//leucine-rich PPR motif-containing protein, mitochondrial;K17964//leucine-rich PPR motif-containing protein, mitochondrial	APR63139.1|2.0e-310|DA2, partial [Triticum aestivum]	GO:0043167//ion binding;GO:0043169//cation binding;GO:0005488//binding;GO:0046872//metal ion binding;
TraesCS5A02G358700	2.02	1.66	1.16	1.46	2.03	2.36	5.41	5.22	3.43	4.51	3.05	5.29	1.5683	1.14732e-77	1.32488	2.89413e-51	1.32875	1.05648e-60	1.08533	1.10977e-37	1.32832	2.5877e-110		Triticum aestivum cDNA, clone: WT006_N16, cultivar: Chinese Spring	K20547//basic endochitinase B [EC:3.2.1.14]+ko04016//MAPK signaling pathway - plant+ko00520//Amino sugar and nucleotide sugar metabolism+ko01100//Metabolic pathways;K00430//peroxidase [EC:1.11.1.7]+ko01100//Metabolic pathways+ko01110//Biosynthesis of secondary metabolites+ko00940//Phenylpropanoid biosynthesis;K20547//basic endochitinase B [EC:3.2.1.14]+ko04016//MAPK signaling pathway - plant+ko00…	XP_020198458.1|1.6e-216|probable purine permease 5 [Aegilops tauschii subsp. tauschii]	GO:0016020//membrane;GO:0031224//intrinsic component of membrane;GO:0016021//integral component of membrane;GO:0044425//membrane part;GO:0005215//transporter activity;
TraesCS2B02G569400	1.6	1.65	1.64	1.45	1.42	1.63	16.39	17.24	15.87	1.46	1.15	1.22	3.33834	0	-0.348857	0.0141601	3.45334	0	-0.233864	0.107791	2.51008	0			K22020//mucin-19	EMS65281.1|8.8e-78|hypothetical protein TRIUR3_32617 [Triticum urartu]
TraesCS3B02G565600	4.11	2.85	2.14	0.98	1.72	1.66	12.72	23.15	6.77	4.17	3.25	2.73	2.24497	1.35252e-37	0.202683	0.418169	3.25431	1.39928e-54	1.21202	5.0211e-05	1.97992	1.13535e-39				CDM86739.1|8.9e-38|unnamed protein product [Triticum aestivum]
TraesCS3D02G223500	2.27	1.69	1.38	2.51	4.55	2.38	7.39	10.32	4.74	3.37	3.07	3.6	2.07625	2.27455e-167	0.916041	3.4412e-23	1.24855	2.88211e-81	0.088346	0.270683	1.14275	6.78997e-102			K09753//cinnamoyl-CoA reductase [EC:1.2.1.44]+ko01100//Metabolic pathways+ko01110//Biosynthesis of secondary metabolites+ko00940//Phenylpropanoid biosynthesis	XP_020168235.1|2.3e-217|cinnamoyl-CoA reductase-like SNL6 [Aegilops tauschii subsp. tauschii]
TraesCS2B02G445200	0.71	0.18	0.17	1.69	3.82	0.48	4.27	3.86	1.78	1.88	13.32	0.31	3.22876	1.99746e-211	3.88377	0	0.725934	6.63989e-27	1.38095	3.33791e-115	1.85866	3.04802e-287			K04121//ent-kaurene synthase [EC:4.2.3.19]+ko00904//Diterpenoid biosynthesis+ko01100//Metabolic pathways+ko01110//Biosynthesis of secondary metabolites	BAL41689.1|0.0e+00|ent-kaurene synthase like 2 [Triticum aestivum]
TraesCS5B02G429300	2.76	2.35	2.82	6.39	7.32	6.03	18.4	24.43	21.25	9.86	8.87	9.6	3.01469	0	1.84218	3.60807e-123	1.69179	5.68272e-245	0.519271	6.99713e-17	1.74282	0			K14493//gibberellin receptor GID1 [EC:3.-.-.-]+ko04075//Plant hormone signal transduction;K07874//Ras-related protein Rab-1A	XP_020179727.1|4.1e-189|probable carboxylesterase 15 [Aegilops tauschii subsp. tauschii]	GO:0009056//catabolic process;GO:0008152//metabolic process;GO:0003824//catalytic activity;GO:0016787//hydrolase activity;
TraesCS4B02G188800	2.15	1.37	1.16	1.74	2.48	1.72	3.14	4.97	3.23	3.81	4.08	2.97	1.27953	2.26533e-32	1.22332	5.07506e-29	0.924495	1.08487e-19	0.868282	3.8003e-17	1.06431	2.6543e-46			K09841//xanthoxin dehydrogenase [EC:1.1.1.288]+ko00906//Carotenoid biosynthesis+ko01100//Metabolic pathways+ko01110//Biosynthesis of secondary metabolites	XP_020155640.1|9.4e-184|sex determination protein tasselseed-2-like [Aegilops tauschii subsp. tauschii]
TraesCS3D02G256500	4.76	2.98	2.38	3.25	4.2	3.06	9.14	8.13	6.88	7.14	5.42	6.99	1.25784	3.31978e-103	0.953583	5.92769e-54	1.1973	3.45323e-95	0.893047	2.76261e-48	1.08423	7.62272e-146			K20716//mitogen-activated protein kinase kinase kinase 17/18+ko04016//MAPK signaling pathway - plant	XP_020179605.1|1.8e-245|mitogen-activated protein kinase kinase kinase 3-like [Aegilops tauschii subsp. tauschii]	GO:0000166//nucleotide binding;GO:0032559//adenyl ribonucleotide binding;GO:0140096//catalytic activity, acting on a protein;GO:0017076//purine nucleotide binding;GO:0003824//catalytic activity;GO:0016740//transferase activity;GO:0030554//adenyl nucleotide binding;GO:0032555//purine ribonucleotide binding;GO:0032553//ribonucleotide binding;GO:0036094//small molecule binding;GO:0016772//transferas…
TraesCS5B02G337300	23.5	19.04	21.26	21.03	15.38	18.09	10.48	11.81	8.64	79.04	74.75	84.8	-1.03864	3.77323e-243	2.04681	0	-0.825186	1.0344e-142	2.26027	0	1.30255	0			K17535//serine/threonine-protein kinase TNNI3K [EC:2.7.11.1];K04365//B-Raf proto-oncogene serine/threonine-protein kinase [EC:2.7.11.1];K17535//serine/threonine-protein kinase TNNI3K [EC:2.7.11.1];K04365//B-Raf proto-oncogene serine/threonine-protein kinase [EC:2.7.11.1]	XP_003578561.1|0.0e+00|PREDICTED: serine/threonine-protein kinase STY46 [Brachypodium distachyon]	GO:0065007//biological regulation;GO:0007154//cell communication;GO:0050789//regulation of biological process;GO:0050896//response to stimulus;GO:0023052//signaling;GO:0050794//regulation of cellular process;GO:0007165//signal transduction;GO:0035556//intracellular signal transduction;GO:0009987//cellular process;GO:0051716//cellular response to stimulus;GO:0005829//cytosol;GO:0005737//cytoplasm;…
TraesCS4D02G124700	6.23	4.38	3.4	8.09	12.43	7.95	21.32	29.03	13.35	10.79	11.67	10.08	2.18964	0	1.22314	2.53313e-84	1.15884	6.74053e-150	0.192345	0.000262953	1.18559	3.91782e-234			K00430//peroxidase [EC:1.11.1.7]+ko01100//Metabolic pathways+ko01110//Biosynthesis of secondary metabolites+ko00940//Phenylpropanoid biosynthesis;K13412//calcium-dependent protein kinase [EC:2.7.11.1]+ko04626//Plant-pathogen interaction	XP_020187925.1|7.1e-155|NDR1/HIN1-like protein 13 [Aegilops tauschii subsp. tauschii]
TraesCS7B02G015200	1.59	0.43	0.34	1.72	3.3	1.76	20.27	21.73	7.08	2.25	6.77	0.72	4.38282	0	2.0576	1.14471e-110	2.85607	0	0.530843	6.62298e-14	2.69815	0			K15333//tRNA guanosine-2'-O-methyltransferase [EC:2.1.1.34];K12619//5'-3' exoribonuclease 2 [EC:3.1.13.-]+ko03018//RNA degradation+ko03008//Ribosome biogenesis in eukaryotes;K13199//plasminogen activator inhibitor 1 RNA-binding protein;K14568//rRNA small subunit pseudouridine methyltransferase Nep1 [EC:2.1.1.260]+ko03008//Ribosome biogenesis in eukaryotes	XP_020149570.1|0.0e+00|subtilisin-like protease SBT3.9 [Aegilops tauschii subsp. tauschii]
BGI_novel_G007581	0.84	0.99	1.15	0.67	0.93	1.55	0.97	0.19	0.69	5.42	4.35	4.99	-0.685607	1.72914e-05	2.31352	1.62356e-130	-0.773628	9.03008e-07	2.2255	5.15206e-124	1.43196	7.6741e-77
BGI_novel_G006777	4.19	2.28	1.93	6.75	12.99	7.71	15.77	20.88	10.32	12.72	11.62	8.45	2.48539	0	1.97049	2.28371e-188	0.771622	6.4769e-64	0.256721	3.05336e-07	1.1584	1.16096e-209			K00430//peroxidase [EC:1.11.1.7]+ko01100//Metabolic pathways+ko01110//Biosynthesis of secondary metabolites+ko00940//Phenylpropanoid biosynthesis		GO:0051187//cofactor catabolic process;GO:0006950//response to stress;GO:0051186//cofactor metabolic process;GO:0042743//hydrogen peroxide metabolic process;GO:0008152//metabolic process;GO:0044237//cellular metabolic process;GO:0017144//drug metabolic process;GO:0042744//hydrogen peroxide catabolic process;GO:0006979//response to oxidative stress;GO:0050896//response to stimulus;GO:0042737//drug…
TraesCS4A02G334100	3.3	2.6	2.2	0.16	0	1.05	9.75	2.48	10.35	2.81	2.3	2.12	1.47669	3.17033e-77	-0.15922	0.132115	4.22325	2.0517e-238	2.58734	5.91954e-52	1.67836	1.52168e-121			K12121//phytochrome B+ko04712//Circadian rhythm - plant;K02184//formin 2	XP_015613280.1|7.2e-75|PREDICTED: putative glycine-rich cell wall structural protein 1 [Oryza sativa Japonica Group]
TraesCS2B02G401300	7.18	3.14	3.76	6.07	9.36	4.08	13.76	31.46	8.85	9.71	14.87	4.28	1.94381	0	1.04163	1.14246e-156	1.47024	0	0.568059	7.02442e-56	1.30987	0		Hordeum vulgare subsp. vulgare mRNA for predicted protein, partial cds, clone: NIASHv2033O02	K13459//disease resistance protein RPS2+ko04626//Plant-pathogen interaction	AHC94953.1|0.0e+00|resistance protein [Triticum aestivum]
TraesCS7B02G431800	2.06	0.39	0.5	1.78	4.07	1.02	4.64	7.1	2.37	2.39	2.93	0.48	2.26195	9.80431e-162	0.986882	3.3814e-21	1.03457	8.14738e-53	-0.2405	0.00448428	1.02701	3.71793e-73			K22020//mucin-19	XP_020151729.1|6.8e-289|uncharacterized protein LOC109736920 [Aegilops tauschii subsp. tauschii]	GO:0016020//membrane;GO:0044425//membrane part;GO:0031224//intrinsic component of membrane;GO:0016021//integral component of membrane;
TraesCSU02G145500	16.64	10.66	7.62	24.66	35.93	19.55	52.74	86.92	19.77	27.31	41.83	18.04	2.19818	0	1.32876	9.12664e-173	0.988524	1.52153e-196	0.11911	0.00200132	1.10533	0		Leucine-rich repeat protein kinase family protein (best arabidopsis hit)	K00384//thioredoxin reductase (NADPH) [EC:1.8.1.9]+ko00450//Selenocompound metabolism;K00384//thioredoxin reductase (NADPH) [EC:1.8.1.9]+ko00450//Selenocompound metabolism	XP_020171752.1|1.1e-105|germin-like protein 8-5 [Aegilops tauschii subsp. tauschii]
TraesCS7A02G407600	15.63	12.69	9.22	20.95	24.76	21.47	48.52	46.84	27.89	26.58	32.13	38.55	1.71913	0	1.37693	0	0.873886	1.07095e-284	0.531686	2.23754e-94	1.07753	0			K19861//benzyl alcohol O-benzoyltransferase [EC:2.3.1.196 2.3.1.232];K19861//benzyl alcohol O-benzoyltransferase [EC:2.3.1.196 2.3.1.232]	XP_003563544.1|3.9e-230|PREDICTED: benzyl alcohol O-benzoyltransferase-like [Brachypodium distachyon]	GO:0016746//transferase activity, transferring acyl groups;GO:0016740//transferase activity;GO:0016747//transferase activity, transferring acyl groups other than amino-acyl groups;GO:0003824//catalytic activity;
TraesCS5A02G543900	4.23	1.23	0.51	8.62	11.7	5.95	35.46	53.32	16	13.12	18.55	7.77	4.16367	0	2.74835	6.65758e-208	2.08357	0	0.668254	9.90414e-27	2.24506	0		Leucine-rich repeat protein kinase family protein (best arabidopsis hit)	K00384//thioredoxin reductase (NADPH) [EC:1.8.1.9]+ko00450//Selenocompound metabolism;K00384//thioredoxin reductase (NADPH) [EC:1.8.1.9]+ko00450//Selenocompound metabolism	XP_020159656.1|1.1e-78|germin-like protein 8-5 [Aegilops tauschii subsp. tauschii]
TraesCS1D02G039400	65.38	33.82	29.42	41.7	67.21	56.28	233.4	321.36	161.62	108.31	128.97	101.55	2.48128	0	1.40366	0	2.11343	0	1.03581	0	1.84934	0			K10775//phenylalanine ammonia-lyase [EC:4.3.1.24]+ko01100//Metabolic pathways+ko01110//Biosynthesis of secondary metabolites+ko00940//Phenylpropanoid biosynthesis+ko00360//Phenylalanine metabolism;K10775//phenylalanine ammonia-lyase [EC:4.3.1.24]+ko01100//Metabolic pathways+ko01110//Biosynthesis of secondary metabolites+ko00940//Phenylpropanoid biosynthesis+ko00360//Phenylalanine metabolism;K1077…	XP_003580144.1|0.0e+00|PREDICTED: phenylalanine ammonia-lyase [Brachypodium distachyon]	GO:1901605//alpha-amino acid metabolic process;GO:0016054//organic acid catabolic process;GO:0043436//oxoacid metabolic process;GO:0072330//monocarboxylic acid biosynthetic process;GO:1902222//erythrose 4-phosphate/phosphoenolpyruvate family amino acid catabolic process;GO:0044238//primary metabolic process;GO:0017144//drug metabolic process;GO:0009058//biosynthetic process;GO:0044237//cellular m…
TraesCS6D02G072400	11.38	9.35	9.45	10.75	12.24	10	39.96	42.91	19.79	17.3	23.96	13.85	1.77004	0	0.875024	5.4298e-118	1.63649	0	0.74147	8.51931e-89	1.32559	0			K13335//peroxin-16+ko04146//Peroxisome;K13335//peroxin-16+ko04146//Peroxisome	XP_020172238.1|2.1e-213|peroxisome biogenesis protein 16 isoform X2 [Aegilops tauschii subsp. tauschii]	GO:0016043//cellular component organization;GO:0007031//peroxisome organization;GO:0009987//cellular process;GO:0006996//organelle organization;GO:0071840//cellular component organization or biogenesis;GO:0044464//cell part;GO:0005737//cytoplasm;GO:0005623//cell;GO:0031903//microbody membrane;GO:0031090//organelle membrane;GO:0044422//organelle part;GO:0043231//intracellular membrane-bounded orga…
BGI_novel_G012716	0	0	0	3.11	12.57	3.7	19.17	30.32	4.21	3.39	11.72	1.14	9.35751	6.97677e-60	7.64672	4.85061e-23	1.44217	4.54139e-23	-0.268618	0.172125	1.8385	2.38066e-41
TraesCS7A02G405600	11.83	9.97	6.4	12.64	14.2	10.25	27.4	29.19	23.04	17.32	20.59	20.04	1.43085	0	0.970635	2.22361e-164	1.08149	3.32851e-269	0.621271	1.06644e-76	1.03606	0			K02882//large subunit ribosomal protein L18Ae+ko03010//Ribosome;K13172//serine/arginine repetitive matrix protein 2;K13172//serine/arginine repetitive matrix protein 2	XP_020157974.1|7.7e-291|aspartyl protease family protein At5g10770-like [Aegilops tauschii subsp. tauschii]
TraesCS6A02G271100	2.82	2.42	1.96	3.9	5.36	3.58	10.23	13.56	5.8	5.28	3.9	4.48	2.03207	1.25385e-191	0.927281	1.37112e-28	1.20015	8.08752e-90	0.0953631	0.1887	1.11309	2.97273e-116			K02184//formin 2;K21952//CASK-interacting protein;K02184//formin 2;K18749//protein LSM14	XP_020192909.1|3.8e-107|uncharacterized protein LOC109778744 [Aegilops tauschii subsp. tauschii]	GO:0031224//intrinsic component of membrane;GO:0016021//integral component of membrane;GO:0044425//membrane part;GO:0016020//membrane;
TraesCS7A02G440400	5.09	2.56	2.79	0	0	0	10.78	6.58	6.12	0	0	0.17	1.1763	4.6547e-22	-5.92408	1.54106e-45	9.72227	2.82893e-73			1.18888	1.42139e-22			K05933//aminocyclopropanecarboxylate oxidase [EC:1.14.17.4]+ko01100//Metabolic pathways+ko01110//Biosynthesis of secondary metabolites+ko00270//Cysteine and methionine metabolism;K06901//putative MFS transporter, AGZA family, xanthine/uracil permease	BAD23370.1|3.0e-64|putative 2-oxoacid-dependent oxidase [Oryza sativa Japonica Group]	GO:0071496//cellular response to external stimulus;GO:0051716//cellular response to stimulus;GO:0050896//response to stimulus;GO:0033554//cellular response to stress;GO:0009267//cellular response to starvation;GO:0042594//response to starvation;GO:0009605//response to external stimulus;GO:0009991//response to extracellular stimulus;GO:0031668//cellular response to extracellular stimulus;GO:000715…
TraesCS4D02G264100	3.35	1.5	1.27	1.44	3.27	1.12	6.98	10.72	12.85	3.26	3.92	0.97	2.31942	0	0.422095	8.31598e-09	2.38124	0	0.483918	7.04579e-11	1.69816	0			K17470//sulfate transporter 1, high-affinity;K17470//sulfate transporter 1, high-affinity	XP_010229044.1|0.0e+00|PREDICTED: sulfate transporter 1.2-like [Brachypodium distachyon]	GO:0044464//cell part;GO:0071944//cell periphery;GO:0031224//intrinsic component of membrane;GO:0005623//cell;GO:0044425//membrane part;GO:0005886//plasma membrane;GO:0016021//integral component of membrane;GO:0016020//membrane;GO:1901682//sulfur compound transmembrane transporter activity;GO:0015103//inorganic anion transmembrane transporter activity;GO:0022804//active transmembrane transporter …
TraesCS3B02G409400	8.75	4.13	3.97	3.6	6.93	3.55	18.37	23.4	11.13	9.73	10.99	5.4	1.65483	3.41994e-276	0.640399	1.4666e-30	1.90665	0	0.892217	9.094e-53	1.3579	7.04926e-307		PREDICTED: Vitis vinifera hypothetical protein LOC100249092 (LOC100249092), mRNA	K22020//mucin-19	BAJ95467.1|2.1e-220|predicted protein [Hordeum vulgare subsp. vulgare]	GO:0003824//catalytic activity;GO:0016740//transferase activity;GO:0004842//ubiquitin-protein transferase activity;GO:0140096//catalytic activity, acting on a protein;GO:0019787//ubiquitin-like protein transferase activity;
TraesCS5A02G494200	1.11	1.43	1.77	1.45	1.48	1.48	3.35	2.98	2.88	3.31	3.33	2.66	1.09452	3.60844e-25	1.11213	6.26783e-26	1.05597	9.969e-24	1.07358	1.81499e-24	1.08399	6.13335e-48			K15746//beta-carotene 3-hydroxylase [EC:1.14.13.129]+ko00906//Carotenoid biosynthesis+ko01100//Metabolic pathways+ko01110//Biosynthesis of secondary metabolites	AFX79621.1|2.8e-166|beta-carotene hydroxylase A2 [Triticum aestivum]
TraesCS5D02G004500	0.12	0.25	0.32	1.51	3.75	1.75	18.2	20.62	7.77	3.6	6.73	1.06	6.07638	0	4.05121	2.84823e-149	2.73072	0	0.705547	6.88994e-16	2.92346	0			K08900//mitochondrial chaperone BCS1	CAH10203.1|7.8e-289|Cell Division Protein AAA ATPase family [Triticum aestivum]
BGI_novel_G003838	1.52	0.78	0.77	0.78	1.76	1.13	4.47	9.42	3.65	2.37	2.48	1.08	2.51655	8.65823e-64	0.960538	9.61121e-07	2.25199	5.98619e-56	0.695982	0.000209261	1.80566	2.18771e-56
TraesCS7D02G177000	1.12	2.23	1.09	1.62	2.36	2.1	3.28	2.28	3.92	3.38	2.65	5.74	1.09854	3.13889e-17	1.41329	2.86402e-30	0.634932	1.33266e-07	0.949681	9.97865e-17	1.01424	3.50012e-32			K13172//serine/arginine repetitive matrix protein 2	XP_020177549.1|7.6e-80|uncharacterized protein LOC109763099 [Aegilops tauschii subsp. tauschii]	GO:0016491//oxidoreductase activity;GO:0003824//catalytic activity;GO:0009055//electron transfer activity;
TraesCS3D02G273200	17.63	8.19	8.98	10.93	18.17	9.31	28.46	37.76	20.94	26.33	30.23	15.66	1.30038	0	1.02285	1.28015e-293	1.18105	0	0.903522	4.88829e-238	1.10854	0			K17535//serine/threonine-protein kinase TNNI3K [EC:2.7.11.1];K04365//B-Raf proto-oncogene serine/threonine-protein kinase [EC:2.7.11.1];K17535//serine/threonine-protein kinase TNNI3K [EC:2.7.11.1];K04365//B-Raf proto-oncogene serine/threonine-protein kinase [EC:2.7.11.1];K17535//serine/threonine-protein kinase TNNI3K [EC:2.7.11.1];K04365//B-Raf proto-oncogene serine/threonine-protein kinase [EC:2…	XP_020172818.1|0.0e+00|serine/threonine-protein kinase A-Raf-like [Aegilops tauschii subsp. tauschii]	GO:0044267//cellular protein metabolic process;GO:0006464//cellular protein modification process;GO:0043412//macromolecule modification;GO:0044260//cellular macromolecule metabolic process;GO:0035556//intracellular signal transduction;GO:0050789//regulation of biological process;GO:0019538//protein metabolic process;GO:0023052//signaling;GO:0006796//phosphate-containing compound metabolic process…
TraesCS7B02G015100	12.09	3.68	3.42	16.12	40.15	13.7	43.27	54.57	17.46	25.45	52.28	7.99	2.56455	0	2.18625	0	0.772181	4.9292e-201	0.393873	4.71155e-47	1.23447	0			K15333//tRNA guanosine-2'-O-methyltransferase [EC:2.1.1.34];K12619//5'-3' exoribonuclease 2 [EC:3.1.13.-]+ko03018//RNA degradation+ko03008//Ribosome biogenesis in eukaryotes;K13199//plasminogen activator inhibitor 1 RNA-binding protein;K14568//rRNA small subunit pseudouridine methyltransferase Nep1 [EC:2.1.1.260]+ko03008//Ribosome biogenesis in eukaryotes;K15333//tRNA guanosine-2'-O-methyltransfe…	XP_020149571.1|0.0e+00|subtilisin-like protease SBT3.9 [Aegilops tauschii subsp. tauschii]
TraesCS7A02G091200	1.12	0.27	0.31	1.46	2.01	1.41	6.67	10.13	4.32	1.99	3.02	1.52	3.65571	0	1.95171	1.06399e-67	2.14536	2.68793e-244	0.441369	3.4783e-07	2.10563	0			K04733//interleukin-1 receptor-associated kinase 4 [EC:2.7.11.1];K04733//interleukin-1 receptor-associated kinase 4 [EC:2.7.11.1];K04733//interleukin-1 receptor-associated kinase 4 [EC:2.7.11.1]	XP_020147729.1|0.0e+00|wall-associated receptor kinase 3-like isoform X2 [Aegilops tauschii subsp. tauschii]
TraesCS3D02G256600	17.81	12.47	11.91	13.52	17.37	14.63	35.64	38.74	28.2	27.57	21.49	27.41	1.28385	0	0.860976	1.28812e-172	1.1699	0	0.747022	5.61509e-135	1.03135	0			K20716//mitogen-activated protein kinase kinase kinase 17/18+ko04016//MAPK signaling pathway - plant	XP_020169523.1|4.6e-262|mitogen-activated protein kinase kinase kinase NPK1-like [Aegilops tauschii subsp. tauschii]	GO:0032147//activation of protein kinase activity;GO:0016310//phosphorylation;GO:0033674//positive regulation of kinase activity;GO:1901564//organonitrogen compound metabolic process;GO:0045859//regulation of protein kinase activity;GO:0060255//regulation of macromolecule metabolic process;GO:0019220//regulation of phosphate metabolic process;GO:0009893//positive regulation of metabolic process;G…
BGI_novel_G000784	6.08	4.34	3.12	4.53	8.87	5.21	17.3	16.34	12.67	8.14	10.31	5.24	1.77859	1.0698e-219	0.816658	1.51093e-34	1.31098	1.9454e-140	0.349049	1.44495e-08	1.12772	2.09532e-167			K00799//glutathione S-transferase [EC:2.5.1.18]+ko00480//Glutathione metabolism
TraesCS5B02G363800	18.1	13.18	11.85	13.01	17.44	15.83	53.9	68.01	29.1	26.2	31.22	20.27	1.8121	0	0.854292	1.78961e-255	1.70684	0	0.749027	3.80596e-203	1.36084	0			K00327//NADPH-ferrihemoprotein reductase [EC:1.6.2.4]	CAC83301.1|0.0e+00|cytochrome P450 reductase [Triticum aestivum]	GO:0044422//organelle part;GO:0044425//membrane part;GO:0042175//nuclear outer membrane-endoplasmic reticulum membrane network;GO:0044424//intracellular part;GO:0005622//intracellular;GO:0044446//intracellular organelle part;GO:0044444//cytoplasmic part;GO:0043226//organelle;GO:0005783//endoplasmic reticulum;GO:0043229//intracellular organelle;GO:0031984//organelle subcompartment;GO:0005737//cyto…
TraesCS7A02G528000	4.37	3.98	2.88	9.23	14.2	9.48	16.81	20.34	14.52	13.59	12.99	12.38	2.20487	0	1.80014	1.02162e-245	0.647125	3.12522e-64	0.242397	3.84843e-09	1.04168	4.65965e-249			K02882//large subunit ribosomal protein L18Ae+ko03010//Ribosome;K06002//pepsin A [EC:3.4.23.1];K01381//saccharopepsin [EC:3.4.23.25]	XP_020160808.1|1.1e-280|aspartic proteinase nepenthesin-2-like [Aegilops tauschii subsp. tauschii]	GO:1901564//organonitrogen compound metabolic process;GO:0008152//metabolic process;GO:0044238//primary metabolic process;GO:0009056//catabolic process;GO:1901575//organic substance catabolic process;GO:0030163//protein catabolic process;GO:0009057//macromolecule catabolic process;GO:1901565//organonitrogen compound catabolic process;GO:0019538//protein metabolic process;GO:0071704//organic subst…
TraesCS7B02G105600	14.49	8.94	8.88	11.6	18.18	11.29	31.22	35.82	20.43	26.63	26.12	25.93	1.44026	0	1.28852	0	1.08818	7.39304e-263	0.936442	3.58369e-184	1.18094	0		PREDICTED: Vitis vinifera hypothetical protein LOC100249092 (LOC100249092), mRNA	K22020//mucin-19	XP_020179916.1|8.2e-242|U-box domain-containing protein 21-like [Aegilops tauschii subsp. tauschii]	GO:0016740//transferase activity;GO:0004842//ubiquitin-protein transferase activity;GO:0003824//catalytic activity;GO:0019787//ubiquitin-like protein transferase activity;GO:0140096//catalytic activity, acting on a protein;
TraesCS2A02G396400	6.72	3.96	3.25	4.34	6.45	3.78	15.53	19.49	10.27	8.6	9.53	8.38	1.68947	0	0.955904	1.24702e-88	1.60377	0	0.870208	1.38427e-75	1.3278	0			K20772//1-aminocyclopropane-1-carboxylate synthase 1/2/6 [EC:4.4.1.14]+ko04016//MAPK signaling pathway - plant+ko01100//Metabolic pathways+ko01110//Biosynthesis of secondary metabolites+ko00270//Cysteine and methionine metabolism;K20772//1-aminocyclopropane-1-carboxylate synthase 1/2/6 [EC:4.4.1.14]+ko04016//MAPK signaling pathway - plant+ko01100//Metabolic pathways+ko01110//Biosynthesis of secon…	XP_020180633.1|7.8e-282|1-aminocyclopropane-1-carboxylate synthase-like [Aegilops tauschii subsp. tauschii]	GO:0009058//biosynthetic process;GO:0008152//metabolic process;GO:0048037//cofactor binding;GO:0019842//vitamin binding;GO:0003824//catalytic activity;GO:0043167//ion binding;GO:0043168//anion binding;GO:0005488//binding;GO:1901363//heterocyclic compound binding;GO:0050662//coenzyme binding;GO:0097159//organic cyclic compound binding;GO:0036094//small molecule binding;GO:0030170//pyridoxal phosph…
TraesCS3D02G254700	1.11	0.95	0.74	1.03	1.64	1.28	3.16	3.32	2.82	1.4	1.61	1.56	1.73349	1.24961e-65	0.709564	5.01567e-09	1.23343	4.86089e-40	0.2095	0.0603883	1.04322	1.85392e-45			K22020//mucin-19	XP_020178213.1|4.8e-251|F-box/kelch-repeat protein At1g23390-like [Aegilops tauschii subsp. tauschii]
BGI_novel_G004622	1.61	1.48	1.34	0.54	1.19	1.39	4.21	6.77	2.85	2.38	2.03	0.83	1.6492	1.02961e-60	0.25731	0.0445672	2.14422	2.92417e-85	0.752334	7.55966e-08	1.34428	1.00975e-61	ABI3VP1	Hordeum vulgare subsp. vulgare mRNA for predicted protein, complete cds, clone: NIASHv2087M16	K09287//RAV-like factor
TraesCS6D02G287100	1.6	2.45	1.25	3.32	2.82	3.85	7.22	5.29	4.78	5.5	3.44	5.38	1.71314	1.86014e-91	1.4498	4.54162e-60	0.777634	3.41808e-27	0.514286	1.02468e-11	1.04817	6.64897e-79			K20628//expansin;K20628//expansin	XP_020171856.1|1.7e-171|expansin-A5-like [Aegilops tauschii subsp. tauschii]	GO:0016043//cellular component organization;GO:0009987//cellular process;GO:0071669//plant-type cell wall organization or biogenesis;GO:0045229//external encapsulating structure organization;GO:0071840//cellular component organization or biogenesis;GO:0009664//plant-type cell wall organization;GO:0071554//cell wall organization or biogenesis;GO:0071555//cell wall organization;GO:0005618//cell wal…
TraesCS5D02G386700	2.68	2.34	1.46	2.43	2.39	2.35	8.29	8.51	5.66	4.57	3.76	6.5	1.79834	8.65835e-116	1.19996	8.14344e-43	1.64362	8.42308e-102	1.04524	1.84282e-34	1.45276	2.07685e-140			K13172//serine/arginine repetitive matrix protein 2;K13171//serine/arginine repetitive matrix protein 1+ko03015//mRNA surveillance pathway+ko03013//RNA transport	XP_020182225.1|2.5e-164|F-box/LRR-repeat protein At3g48880-like [Aegilops tauschii subsp. tauschii]
TraesCS6B02G175600	1.31	0.93	0.63	1.53	1.47	1.47	4.5	3.84	3.5	2.29	2.29	3.46	2.03857	7.46992e-83	1.48423	4.95175e-37	1.3911	7.97619e-49	0.836768	1.2502e-15	1.43136	2.41334e-84			K09753//cinnamoyl-CoA reductase [EC:1.2.1.44]+ko01100//Metabolic pathways+ko01110//Biosynthesis of secondary metabolites+ko00940//Phenylpropanoid biosynthesis;K09753//cinnamoyl-CoA reductase [EC:1.2.1.44]+ko01100//Metabolic pathways+ko01110//Biosynthesis of secondary metabolites+ko00940//Phenylpropanoid biosynthesis;K09753//cinnamoyl-CoA reductase [EC:1.2.1.44]+ko01100//Metabolic pathways+ko01110…	XP_020160529.1|5.3e-192|cinnamoyl-CoA reductase 2-like [Aegilops tauschii subsp. tauschii]	GO:0005488//binding;GO:0050662//coenzyme binding;GO:0048037//cofactor binding;GO:0003824//catalytic activity;
BGI_novel_G006548	7.02	3.59	2.49	2.66	7.19	1.87	14.86	19.89	10.43	8.99	10.56	5.96	1.79055	0	0.968582	2.11056e-96	1.9448	0	1.12283	1.08304e-121	1.51456	0			K04730//interleukin-1 receptor-associated kinase 1 [EC:2.7.11.1]
TraesCS4B02G327800	20.04	14.93	14.66	17.81	22.07	20.74	48.42	62.07	37.7	32.49	29.2	34.49	1.58545	0	0.920677	0	1.33693	0	0.67216	1.00269e-295	1.16407	0			K13447//respiratory burst oxidase [EC:1.6.3.- 1.11.1.-]+ko04016//MAPK signaling pathway - plant+ko04626//Plant-pathogen interaction;K13447//respiratory burst oxidase [EC:1.6.3.- 1.11.1.-]+ko04016//MAPK signaling pathway - plant+ko04626//Plant-pathogen interaction	XP_020164916.1|0.0e+00|respiratory burst oxidase homolog protein B-like [Aegilops tauschii subsp. tauschii]	GO:0031224//intrinsic component of membrane;GO:0016021//integral component of membrane;GO:0016020//membrane;GO:0044425//membrane part;GO:0003824//catalytic activity;GO:0016651//oxidoreductase activity, acting on NAD(P)H;GO:0004601//peroxidase activity;GO:0046872//metal ion binding;GO:0050664//oxidoreductase activity, acting on NAD(P)H, oxygen as acceptor;GO:0016209//antioxidant activity;GO:001668…
BGI_novel_G011371	1.81	2.67	2.13	4.34	4.56	3.2	7.4	9.61	6.44	9.43	8.42	12.9	1.83046	4.28885e-80	2.22567	1.26612e-133	0.946727	4.35068e-30	1.34194	1.22097e-66	1.53385	7.58284e-142
TraesCS2B02G609800	2.19	2.5	2.44	0.63	0.47	1.36	3.96	2.68	4.99	2.64	2.4	2.98	0.706018	9.44434e-18	0.17266	0.0564941	2.23276	6.89313e-96	1.6994	7.63099e-47	1.03237	2.07226e-53			K00052//3-isopropylmalate dehydrogenase [EC:1.1.1.85]+ko00290//Valine, leucine and isoleucine biosynthesis+ko01230//Biosynthesis of amino acids+ko01100//Metabolic pathways+ko01110//Biosynthesis of secondary metabolites+ko01210//2-Oxocarboxylic acid metabolism+ko00660//C5-Branched dibasic acid metabolism	XP_020180272.1|2.5e-216|3-isopropylmalate dehydrogenase 2, chloroplastic-like [Aegilops tauschii subsp. tauschii]	GO:0009081//branched-chain amino acid metabolic process;GO:1901605//alpha-amino acid metabolic process;GO:0008652//cellular amino acid biosynthetic process;GO:0043436//oxoacid metabolic process;GO:0009987//cellular process;GO:0006082//organic acid metabolic process;GO:0019752//carboxylic acid metabolic process;GO:1901607//alpha-amino acid biosynthetic process;GO:0006520//cellular amino acid metab…
TraesCS2A02G459800	0.62	0.66	0.69	4.01	2.7	1.06	7.73	8.79	9.61	3.6	17.74	7.2	3.73177	5.24325e-262	3.86818	4.76399e-293	1.74049	2.9256e-114	1.87691	5.14218e-138	2.49032	0		Leucine-rich repeat protein kinase family protein (best arabidopsis hit)		XP_020167477.1|8.2e-151|germin-like protein 4-1 [Aegilops tauschii subsp. tauschii]	GO:0044464//cell part;GO:0005576//extracellular region;GO:0005623//cell;GO:0071944//cell periphery;GO:0030312//external encapsulating structure;GO:0048046//apoplast;GO:0005618//cell wall;GO:0005488//binding;GO:0046872//metal ion binding;GO:0046914//transition metal ion binding;GO:0030145//manganese ion binding;GO:0043167//ion binding;GO:0045735//nutrient reservoir activity;GO:0043169//cation bind…
TraesCS3B02G156200	15.85	3.75	4.52	9.93	17.95	6.49	53.49	80.01	21.92	14.14	16.38	3.88	2.70723	0	0.52011	8.49615e-45	2.19748	0	0.0103584	0.760541	1.72338	0			K15333//tRNA guanosine-2'-O-methyltransferase [EC:2.1.1.34];K14568//rRNA small subunit pseudouridine methyltransferase Nep1 [EC:2.1.1.260]+ko03008//Ribosome biogenesis in eukaryotes;K12663//Delta(3,5)-Delta(2,4)-dienoyl-CoA isomerase [EC:5.3.3.-]+ko04146//Peroxisome;K15333//tRNA guanosine-2'-O-methyltransferase [EC:2.1.1.34];K12619//5'-3' exoribonuclease 2 [EC:3.1.13.-]+ko03018//RNA degradation+k…	CDM82077.1|3.9e-227|unnamed protein product [Triticum aestivum]
BGI_novel_G002328	4.9	4.85	2.91	5.55	5.75	4.49	16.19	17.22	16.26	3.46	3.89	4.22	1.97519	0	-0.123612	0.0951018	1.6483	4.87701e-252	-0.450499	1.3461e-10	1.11165	1.59242e-171			K00430//peroxidase [EC:1.11.1.7]+ko01100//Metabolic pathways+ko01110//Biosynthesis of secondary metabolites+ko00940//Phenylpropanoid biosynthesis;K13171//serine/arginine repetitive matrix protein 1+ko03015//mRNA surveillance pathway+ko03013//RNA transport		GO:0055071//manganese ion homeostasis;GO:0055076//transition metal ion homeostasis;GO:0071281//cellular response to iron ion;GO:0048878//chemical homeostasis;GO:0019725//cellular homeostasis;GO:0006812//cation transport;GO:0097577//sequestering of iron ion;GO:0000041//transition metal ion transport;GO:0055082//cellular chemical homeostasis;GO:0071421//manganese ion transmembrane transport;GO:0030…
TraesCS2D02G330600	1.97	2.35	1.38	4.25	7.09	5.07	14.28	13.4	9.24	3.9	3.27	4.96	2.74168	9.64112e-120	1.112	1.31328e-12	1.24192	2.50061e-42	-0.38776	0.00137606	1.21704	6.96895e-54			K10523//speckle-type POZ protein;K19307//25S rRNA (uracil2634-N3)-methyltransferase [EC:2.1.1.313];K04733//interleukin-1 receptor-associated kinase 4 [EC:2.7.11.1];K10523//speckle-type POZ protein;K10523//speckle-type POZ protein;K19307//25S rRNA (uracil2634-N3)-methyltransferase [EC:2.1.1.313]	XP_020149036.1|9.8e-59|heavy metal-associated isoprenylated plant protein 46-like [Aegilops tauschii subsp. tauschii]
TraesCS7B02G084400	2.28	1.22	0.93	0.91	2.54	1.09	4.77	5.63	3.08	2.49	3.55	2.02	1.61188	5.70416e-43	0.875594	5.75047e-11	1.56553	4.49647e-41	0.829241	4.42489e-10	1.26923	1.26407e-47			K00799//glutathione S-transferase [EC:2.5.1.18]+ko00480//Glutathione metabolism	XP_020186766.1|6.4e-106|glutathione S-transferase 4-like [Aegilops tauschii subsp. tauschii]
TraesCS5B02G128900	4.08	4.52	4.42	4.51	4.83	5.79	11.59	9.98	13.21	13.8	11.47	13.89	1.41757	6.96753e-240	1.59141	0	1.1971	2.94347e-184	1.37094	2.97956e-254	1.39264	0			K13171//serine/arginine repetitive matrix protein 1+ko03015//mRNA surveillance pathway+ko03013//RNA transport	XP_010227347.1|5.1e-107|PREDICTED: uncharacterized protein LOC100833536 [Brachypodium distachyon]	GO:0044260//cellular macromolecule metabolic process;GO:0006397//mRNA processing;GO:0010467//gene expression;GO:0006807//nitrogen compound metabolic process;GO:0044237//cellular metabolic process;GO:0090304//nucleic acid metabolic process;GO:0044238//primary metabolic process;GO:0006396//RNA processing;GO:0016071//mRNA metabolic process;GO:0043170//macromolecule metabolic process;GO:0071704//orga…
TraesCS3D02G402200	3.02	3.46	1.33	2.65	3.44	4.17	9.01	9.36	5.61	7.5	5.34	8.65	1.62478	2.44589e-117	1.46574	2.90259e-90	1.22306	9.92529e-77	1.06402	3.81938e-55	1.33411	3.47494e-164		Medicago truncatula NBS resistance protein (MTR_4g055630) mRNA, complete cds	K14209//solute carrier family 36 (proton-coupled amino acid transporter)	XP_020152082.1|1.5e-279|amino acid permease 3-like [Aegilops tauschii subsp. tauschii]
BGI_novel_G004708	2.22	1.45	1.34	1.81	2.69	1.93	6.09	8.17	3.06	5.08	4.44	3.97	1.79412	1.14036e-143	1.43231	3.93179e-81	1.43035	1.19764e-103	1.06854	1.17229e-51	1.43321	2.63808e-183			K04733//interleukin-1 receptor-associated kinase 4 [EC:2.7.11.1];K08360//cytochrome b-561 [EC:1.16.5.1]
TraesCS3A02G030700	3.06	2.5	2.71	4.71	4.78	7.49	16.71	15.62	11.39	10.76	8.76	11.88	2.40521	0	1.92723	5.79359e-307	1.36458	3.41884e-261	0.886597	3.84535e-94	1.57763	0			K18207//protein O-mannose beta-1,4-N-acetylglucosaminyltransferase [EC:2.4.1.312]+ko00515//Mannose type O-glycan biosynthesis+ko01100//Metabolic pathways;K18134//protein O-GlcNAc transferase [EC:2.4.1.255]+ko00514//Other types of O-glycan biosynthesis	XP_020177815.1|0.0e+00|uncharacterized protein LOC109763383 [Aegilops tauschii subsp. tauschii]	GO:0016020//membrane;GO:0031224//intrinsic component of membrane;GO:0016021//integral component of membrane;GO:0044425//membrane part;GO:0016757//transferase activity, transferring glycosyl groups;GO:0016740//transferase activity;GO:0003824//catalytic activity;
TraesCS3D02G019400	2.95	1.86	1.01	3.13	8.99	4.63	21.13	25.39	10.56	10.41	9.91	6.04	3.29827	0	2.18693	7.10946e-152	1.76569	1.49278e-246	0.654351	1.63488e-24	1.89287	0			K14325//RNA-binding protein with serine-rich domain 1+ko03015//mRNA surveillance pathway+ko03013//RNA transport;K19475//WAS/WASL-interacting protein+ko04144//Endocytosis;K13993//HSP20 family protein+ko04141//Protein processing in endoplasmic reticulum	XP_020191739.1|2.5e-88|uncharacterized protein LOC109777527 [Aegilops tauschii subsp. tauschii]
TraesCS4D02G007200	2.71	2.38	1.84	3.16	3.08	1.9	16.5	36.17	18.45	8.19	8.24	2.82	3.3618	0	1.48297	1.19616e-71	3.12186	0	1.24303	7.01492e-55	2.58963	0			K00122//formate dehydrogenase [EC:1.17.1.9]+ko01100//Metabolic pathways+ko01200//Carbon metabolism+ko00630//Glyoxylate and dicarboxylate metabolism;K00122//formate dehydrogenase [EC:1.17.1.9]+ko01100//Metabolic pathways+ko01200//Carbon metabolism+ko00630//Glyoxylate and dicarboxylate metabolism	ANW82830.1|4.2e-206|NAD-dependent formate dehydrogenase [Triticum aestivum]
BGI_novel_G009935	2	2.37	1.99	0	0.01	0.24	1.4	1.66	2.71	2.47	1.51	3.91	-0.143648	0.361767	0.315749	0.0304636	4.51374	2.91672e-37	4.97313	5.56432e-52	1.04042	1.40467e-16					GO:0006464//cellular protein modification process;GO:0009987//cellular process;GO:0051716//cellular response to stimulus;GO:0007165//signal transduction;GO:1901564//organonitrogen compound metabolic process;GO:0006793//phosphorus metabolic process;GO:0006807//nitrogen compound metabolic process;GO:0044238//primary metabolic process;GO:0036211//protein modification process;GO:0050789//regulation o…
TraesCS2D02G174200	1.87	1.03	1.07	1.87	2.17	2.09	7.3	8.18	4.58	1.56	1.85	1.01	2.33825	6.52015e-125	0.161999	0.260151	1.70622	4.62806e-83	-0.470028	0.000276417	1.28355	4.73235e-67				XP_020159373.1|7.5e-101|uncharacterized protein LOC109744627 [Aegilops tauschii subsp. tauschii]
TraesCS3B02G288300	6.65	3.8	4.01	4.48	6.61	6.03	24.74	28.94	14.95	13.63	10.75	11.1	2.25096	0	1.30186	1.49605e-90	1.99945	0	1.05035	1.49678e-64	1.72535	0			K20716//mitogen-activated protein kinase kinase kinase 17/18+ko04016//MAPK signaling pathway - plant	CDM83713.1|2.8e-211|unnamed protein product [Triticum aestivum]
TraesCS5B02G477200	2.12	1.45	0.81	1.07	2.91	3.3	7.39	9.68	6.73	3.49	4.38	2.31	2.45309	8.49609e-37	1.24695	1.88807e-07	1.68445	3.51248e-23	0.47831	0.022744	1.54304	6.68343e-29				EMT13184.1|1.7e-23|hypothetical protein F775_03172 [Aegilops tauschii]
TraesCS4D02G102900	18.07	14.17	13.09	10.71	12.59	13.91	30.11	43.39	33.84	27.69	18.89	22.94	1.24746	2.54984e-120	0.631498	3.74319e-26	1.51469	3.02409e-160	0.898721	1.24649e-46	1.10082	1.60077e-161				EMT01120.1|4.7e-45|hypothetical protein F775_31013 [Aegilops tauschii]
TraesCS6B02G312700	4.11	0.65	1.12	1.13	2.32	0.51	3.68	5.86	1.69	2.88	4.63	1.13	0.942654	4.91414e-09	0.574232	0.000859656	1.49293	4.38448e-17	1.1245	3.24539e-09	1.01909	1.08909e-16				XP_020196065.1|5.4e-99|universal stress protein A-like protein [Aegilops tauschii subsp. tauschii]	GO:0050896//response to stimulus;GO:0006950//response to stress;
TraesCS3A02G335300	2.08	1.99	2.29	0.91	0.58	0.7	4.36	3.02	4.05	4.03	3.77	5.01	0.720311	8.53398e-30	0.893954	2.31183e-47	1.79638	3.48627e-121	1.97002	2.80351e-153	1.2467	1.26637e-149		Leucine-rich repeat transmembrane protein kinase protein (best arabidopsis hit); senescence-induced receptor-like serine/threonine-protein kinase precursor, putative, expressed (best rice hit)	K04733//interleukin-1 receptor-associated kinase 4 [EC:2.7.11.1];K04733//interleukin-1 receptor-associated kinase 4 [EC:2.7.11.1];K04733//interleukin-1 receptor-associated kinase 4 [EC:2.7.11.1];K04733//interleukin-1 receptor-associated kinase 4 [EC:2.7.11.1]	XP_020146332.1|1.5e-185|probable LRR receptor-like serine/threonine-protein kinase PAM74 [Aegilops tauschii subsp. tauschii]	GO:0031224//intrinsic component of membrane;GO:0044425//membrane part;GO:0016020//membrane;GO:0016021//integral component of membrane;GO:0008144//drug binding;GO:1901265//nucleoside phosphate binding;GO:0032559//adenyl ribonucleotide binding;GO:0016301//kinase activity;GO:1901363//heterocyclic compound binding;GO:0004672//protein kinase activity;GO:0140096//catalytic activity, acting on a protein…
TraesCS3A02G093400	13.72	10.98	9.69	8.04	20.75	21.27	36.76	29.04	37.61	30.58	29.59	21.37	1.58909	0	1.25307	2.43261e-217	1.04091	3.57575e-204	0.704896	5.3961e-84	1.13322	0			K08235//xyloglucan:xyloglucosyl transferase [EC:2.4.1.207]	BAJ91838.1|6.3e-143|predicted protein [Hordeum vulgare subsp. vulgare]	GO:0006073//cellular glucan metabolic process;GO:0071554//cell wall organization or biogenesis;GO:0044260//cellular macromolecule metabolic process;GO:0010383//cell wall polysaccharide metabolic process;GO:0043170//macromolecule metabolic process;GO:0044264//cellular polysaccharide metabolic process;GO:0044237//cellular metabolic process;GO:0005975//carbohydrate metabolic process;GO:0042546//cell…
TraesCS2D02G481700	3.27	2.22	1.51	1.6	1.25	0.97	3.85	4.55	3.69	10.88	9.37	13.11	0.793834	1.45167e-18	2.26186	1.19894e-227	1.6553	6.31842e-56	3.12333	0	2.06812	4.99853e-276			K08695//anthocyanidin reductase [EC:1.3.1.77]+ko01110//Biosynthesis of secondary metabolites+ko00941//Flavonoid biosynthesis;K08695//anthocyanidin reductase [EC:1.3.1.77]+ko01110//Biosynthesis of secondary metabolites+ko00941//Flavonoid biosynthesis	EMT25076.1|4.9e-213|Leucoanthocyanidin reductase [Aegilops tauschii]
TraesCS3B02G003500	16.61	11.21	14.08	3.88	4.54	5.25	25.16	20.49	28.7	21.16	16.68	27.26	0.826916	1.27552e-108	0.638666	3.66071e-61	2.43669	0	2.24844	0	1.3241	0			K14325//RNA-binding protein with serine-rich domain 1+ko03015//mRNA surveillance pathway+ko03013//RNA transport;K13171//serine/arginine repetitive matrix protein 1+ko03015//mRNA surveillance pathway+ko03013//RNA transport	CDM80000.1|4.7e-120|unnamed protein product [Triticum aestivum]
TraesCS1A02G441800	3.6	4.01	4.17	0	0	0.46	4.05	4.68	3.3	4.89	3.75	4.48	0.0363541	0.496107	0.161535	0.00206312	4.69701	0	4.82219	0	1.03763	1.36443e-122				XP_020165972.1|3.5e-311|uncharacterized protein LOC109751499 isoform X2 [Aegilops tauschii subsp. tauschii]
TraesCS7B02G219900	9.49	13.39	6.5	7.01	6.79	6.6	22.49	33.36	22.99	21.49	20.18	34.55	1.42789	1.93024e-300	1.37996	1.8462e-274	1.9451	0	1.89717	0	1.63861	0			K00430//peroxidase [EC:1.11.1.7]+ko01100//Metabolic pathways+ko01110//Biosynthesis of secondary metabolites+ko00940//Phenylpropanoid biosynthesis	XP_020148640.1|9.7e-180|peroxidase 47-like [Aegilops tauschii subsp. tauschii]	GO:0009664//plant-type cell wall organization;GO:0044248//cellular catabolic process;GO:0044237//cellular metabolic process;GO:0072593//reactive oxygen species metabolic process;GO:0071840//cellular component organization or biogenesis;GO:0051187//cofactor catabolic process;GO:0009987//cellular process;GO:0006979//response to oxidative stress;GO:0042744//hydrogen peroxide catabolic process;GO:004…
TraesCS4A02G321400	1.22	1.01	0.83	1	1.52	1.54	2.36	2.56	1.06	2.79	3.85	1.75	0.951602	1.25239e-38	1.47323	7.19713e-107	0.551239	8.20561e-16	1.07287	1.52452e-65	1.02115	6.18781e-102			K20848//fructan beta-(2,1)-fructosidase [EC:3.2.1.153];K20848//fructan beta-(2,1)-fructosidase [EC:3.2.1.153];K20848//fructan beta-(2,1)-fructosidase [EC:3.2.1.153];K20848//fructan beta-(2,1)-fructosidase [EC:3.2.1.153]	XP_020177188.1|1.0e-266|beta-fructofuranosidase, insoluble isoenzyme 4-like [Aegilops tauschii subsp. tauschii]
TraesCS3D02G405500	1.78	0.92	1.12	1.42	2.96	1.82	8.35	10.74	5.04	3.06	3.03	1.86	2.66217	2.65085e-255	1.06374	6.62822e-25	1.9573	5.24847e-176	0.35886	8.89241e-05	1.68502	5.4991e-191			K18054//2'-deoxymugineic-acid 2'-dioxygenase / mugineic-acid 3-dioxygenase [EC:1.14.11.24 1.14.11.25]	XP_020193655.1|6.4e-202|2'-deoxymugineic-acid 2'-dioxygenase-like [Aegilops tauschii subsp. tauschii]
TraesCS7B02G481000	8.05	6.11	6.49	4.88	5.95	7.73	18.34	18.65	19.06	18.76	15.91	24.59	1.44248	4.02156e-124	1.52846	2.2072e-142	1.58563	9.52434e-142	1.67161	5.23464e-161	1.5553	9.3165e-282			K15706//E3 ubiquitin-protein ligase RNF167 [EC:2.3.2.27];K19040//E3 ubiquitin-protein ligase ATL10/75/76/77/78 [EC:2.3.2.27]	XP_020164440.1|5.9e-92|probable E3 ubiquitin-protein ligase ATL44 [Aegilops tauschii subsp. tauschii]
TraesCS6A02G057400	2.11	2.91	1.88	6.95	8.71	5.27	11.31	11.64	15.31	6.74	5.96	5.79	2.47212	1.37607e-180	1.43109	2.30714e-43	0.859915	1.73426e-39	-0.181112	0.0211687	1.0297	1.25974e-77	NAC	NAC domain containing protein 90 (best arabidopsis hit); NBS-LRR disease resistance protein, putative, expressed (best rice hit)	K02184//formin 2;K13126//polyadenylate-binding protein+ko03015//mRNA surveillance pathway+ko03018//RNA degradation+ko03013//RNA transport;K22020//mucin-19	AMQ48929.1|9.9e-167|NAC protein [Triticum aestivum]
TraesCS6D02G148500	1.47	0.59	0.7	1.02	1.87	1.2	4.91	5.69	2.53	2.22	2.31	1.41	2.24846	5.57285e-134	1.106	3.77995e-23	1.68299	1.65613e-91	0.540533	9.88533e-08	1.48198	2.60293e-110			K22020//mucin-19	XP_020199102.1|0.0e+00|putative UPF0481 protein At3g02645 [Aegilops tauschii subsp. tauschii]	GO:0016020//membrane;GO:0044425//membrane part;GO:0016021//integral component of membrane;GO:0031224//intrinsic component of membrane;
TraesCS1D02G073300	1.4	1.71	0.88	1.06	1.6	0.92	3.51	4.35	2.13	2.3	2.14	2.07	1.33929	5.34198e-60	0.700651	2.38974e-14	1.49282	5.04354e-70	0.854173	1.6696e-19	1.13137	8.68049e-75				XP_020151402.1|0.0e+00|uncharacterized protein LOC109736599 [Aegilops tauschii subsp. tauschii]
TraesCS7D02G426000	4.21	2.89	3.11	3.27	3.32	2.78	8.54	12.81	5.17	6.74	8.22	5.03	1.38105	7.85379e-224	0.974287	2.69945e-97	1.50285	1.32423e-252	1.09609	4.44121e-117	1.25256	0		Leucine-rich receptor-like protein kinase family protein (best arabidopsis hit); phytosulfokine receptor precursor, putative, expressed (best rice hit)	K13415//protein brassinosteroid insensitive 1 [EC:2.7.10.1 2.7.11.1]+ko04075//Plant hormone signal transduction	XP_020162244.1|0.0e+00|tyrosine-sulfated glycopeptide receptor 1-like [Aegilops tauschii subsp. tauschii]	GO:0031224//intrinsic component of membrane;GO:0016020//membrane;GO:0044425//membrane part;GO:0016021//integral component of membrane;GO:0016740//transferase activity;GO:1901265//nucleoside phosphate binding;GO:0035639//purine ribonucleoside triphosphate binding;GO:0000166//nucleotide binding;GO:0005488//binding;GO:0032553//ribonucleotide binding;GO:0008144//drug binding;GO:0030554//adenyl nucleo…
TraesCS2D02G165500	0.34	0.1	0.09	9.47	10.47	5.63	12.26	12.48	5.99	11.62	22.19	3.64	5.86762	1.59334e-151	6.163	1.35864e-183	0.249987	0.00317892	0.54537	1.45556e-11	1.38182	7.15495e-89				EMT12645.1|6.0e-32|Subtilisin-chymotrypsin inhibitor-2A [Aegilops tauschii]
TraesCS4D02G302000	18.25	2.91	3.13	7.8	22.79	6.23	38.37	61.77	13.07	16.26	33.21	6.47	2.22606	0	1.21399	7.40737e-176	1.6194	0	0.607328	2.26801e-55	1.47652	0			K07893//Ras-related protein Rab-6A;K00850//6-phosphofructokinase 1 [EC:2.7.1.11]+ko00010//Glycolysis / Gluconeogenesis+ko00030//Pentose phosphate pathway+ko01230//Biosynthesis of amino acids+ko03018//RNA degradation+ko01100//Metabolic pathways+ko00052//Galactose metabolism+ko00051//Fructose and mannose metabolism+ko01110//Biosynthesis of secondary metabolites+ko01200//Carbon metabolism;K22020//mu…	XP_020153350.1|7.7e-220|purine permease 3-like [Aegilops tauschii subsp. tauschii]
BGI_novel_G004709	2.22	1.45	1.34	1.81	2.69	1.93	6.09	8.17	3.06	5.08	4.44	3.97	1.79412	1.14036e-143	1.43231	3.93179e-81	1.43035	1.19764e-103	1.06854	1.17229e-51	1.43321	2.63808e-183			K04733//interleukin-1 receptor-associated kinase 4 [EC:2.7.11.1];K08360//cytochrome b-561 [EC:1.16.5.1]
TraesCS1A02G078600	2.36	0.33	0.21	1.72	5.13	1.94	7.9	12.62	2.59	2.58	6.51	0.67	3.00083	9.62465e-202	1.76359	1.44121e-46	1.39296	9.26639e-77	0.155721	0.0953729	1.50092	2.43935e-121			K00430//peroxidase [EC:1.11.1.7]+ko01100//Metabolic pathways+ko01110//Biosynthesis of secondary metabolites+ko00940//Phenylpropanoid biosynthesis	EMS60334.1|1.4e-193|Peroxidase 5 [Triticum urartu]
TraesCS1B02G397400	0.96	1.26	1.05	9.73	5.55	6.04	1.03	1.56	1.72	24.29	20.27	56	0.302027	0.172133	4.85058	0	-1.73068	1.24173e-28	2.81787	0	2.55857	0				XP_020175998.1|1.0e-31|uncharacterized protein LOC109761595 [Aegilops tauschii subsp. tauschii]
TraesCS6A02G337800	1.7	0.73	0.76	0.41	1.27	1.38	7.72	9.08	4.97	0.17	0.12	0.13	2.77136	0	-2.91066	4.06433e-61	2.83239	0	-2.84963	3.36918e-57	1.83799	9.39018e-242			K15333//tRNA guanosine-2'-O-methyltransferase [EC:2.1.1.34];K12619//5'-3' exoribonuclease 2 [EC:3.1.13.-]+ko03018//RNA degradation+ko03008//Ribosome biogenesis in eukaryotes;K13199//plasminogen activator inhibitor 1 RNA-binding protein;K13412//calcium-dependent protein kinase [EC:2.7.11.1]+ko04626//Plant-pathogen interaction	XP_020165840.1|0.0e+00|subtilisin-like protease SBT1.4 [Aegilops tauschii subsp. tauschii]
TraesCS4A02G440200	9.94	7.15	5.95	5.11	6.6	3.61	2.52	4.49	2.04	24.9	25.89	24.35	-1.33742	9.30711e-14	1.73857	8.00763e-61	-0.787007	7.01541e-05	2.28899	6.5783e-86	1.14086	1.30893e-36				XP_020162824.1|9.7e-47|uncharacterized protein LOC109748199 [Aegilops tauschii subsp. tauschii]
BGI_novel_G005953	2.87	1.61	0.67	1.46	2.61	0.86	8.09	12.08	4.9	4.08	3.05	2.07	2.29055	2.59381e-114	0.849593	5.91936e-11	2.34162	9.14326e-117	0.900669	6.81354e-12	1.77235	7.97365e-112
TraesCS4B02G271900	76.63	33.34	34.85	47.91	102.47	51	177.51	234.39	118.55	87.98	131.56	60.23	1.87745	0	0.960525	0	1.39194	0	0.475017	2.98267e-107	1.23151	0			K00430//peroxidase [EC:1.11.1.7]+ko01100//Metabolic pathways+ko01110//Biosynthesis of secondary metabolites+ko00940//Phenylpropanoid biosynthesis;K05747//Wiskott-Aldrich syndrome protein+ko04144//Endocytosis	XP_020193259.1|2.7e-85|mavicyanin-like [Aegilops tauschii subsp. tauschii]
TraesCS4A02G216100	5.93	5.25	4.83	7.34	11.18	6.25	23.89	27.82	21.37	9.22	8.28	10.06	2.19164	0	0.785986	5.07091e-68	1.5578	0	0.152147	0.000172541	1.30779	0			K18875//enhanced disease susceptibility 1 protein+ko04626//Plant-pathogen interaction;K18875//enhanced disease susceptibility 1 protein+ko04626//Plant-pathogen interaction	BAJ89353.1|0.0e+00|predicted protein [Hordeum vulgare subsp. vulgare]
TraesCS3D02G354200	1.72	1.27	0.76	0.89	1.7	1.21	4.13	4.18	3.09	1.67	2.04	1.36	1.60914	1.60399e-79	0.442026	2.40091e-05	1.584	2.07761e-77	0.416889	6.56736e-05	1.13145	3.81385e-67			K05909//laccase [EC:1.10.3.2]	XP_020188127.1|0.0e+00|laccase-4-like [Aegilops tauschii subsp. tauschii]	GO:1901575//organic substance catabolic process;GO:0009987//cellular process;GO:0009698//phenylpropanoid metabolic process;GO:0019748//secondary metabolic process;GO:0071704//organic substance metabolic process;GO:0006725//cellular aromatic compound metabolic process;GO:0009056//catabolic process;GO:0019439//aromatic compound catabolic process;GO:0044248//cellular catabolic process;GO:1901361//or…
TraesCS1D02G039300	91.15	53.19	47.55	63.44	99.87	87.01	225.26	297.91	173.13	133.01	169.04	112.07	1.86234	0	1.11574	0	1.47404	0	0.727445	0	1.33286	0			K10775//phenylalanine ammonia-lyase [EC:4.3.1.24]+ko01100//Metabolic pathways+ko01110//Biosynthesis of secondary metabolites+ko00940//Phenylpropanoid biosynthesis+ko00360//Phenylalanine metabolism	ADB97626.1|6.2e-283|phenylalanine ammonia-lyase [Bambusa oldhamii]	GO:0043436//oxoacid metabolic process;GO:0071704//organic substance metabolic process;GO:0072330//monocarboxylic acid biosynthetic process;GO:1901361//organic cyclic compound catabolic process;GO:0009056//catabolic process;GO:1901362//organic cyclic compound biosynthetic process;GO:0046395//carboxylic acid catabolic process;GO:0042537//benzene-containing compound metabolic process;GO:0006082//org…
TraesCS3A02G444500	0.48	0.29	0.21	2.85	1.93	2.26	3.08	3.86	1.83	2.58	2.77	3.4	3.16172	9.27718e-188	3.1565	1.15723e-185	0.315435	1.90478e-06	0.310211	3.07845e-06	1.13021	2.74898e-97			K17302//coatomer subunit beta'	CDM85900.1|0.0e+00|unnamed protein product [Triticum aestivum]
TraesCS7B02G079500	20.82	9.59	9.25	9	16.9	14.26	33.08	35.4	22.79	35.18	32.33	24.55	1.20561	2.4125e-259	1.22159	5.03192e-266	1.18149	4.91255e-250	1.19747	1.33035e-256	1.20152	0			K05894//12-oxophytodienoic acid reductase [EC:1.3.1.42]+ko00592//alpha-Linolenic acid metabolism+ko01100//Metabolic pathways+ko01110//Biosynthesis of secondary metabolites	BAJ97467.1|9.6e-209|predicted protein [Hordeum vulgare subsp. vulgare]
TraesCS7D02G171000	10.47	4.85	4.21	5.46	12.02	8.97	31.2	37.34	14.11	10.62	13.14	8.96	2.0865	0	0.750222	1.45539e-57	1.64336	0	0.307091	1.77117e-12	1.33432	0			K13172//serine/arginine repetitive matrix protein 2;K22020//mucin-19;K13412//calcium-dependent protein kinase [EC:2.7.11.1]+ko04626//Plant-pathogen interaction	XP_020183569.1|3.0e-282|uncharacterized protein LOC109769225 [Aegilops tauschii subsp. tauschii]	GO:0006629//lipid metabolic process;GO:0044238//primary metabolic process;GO:0071704//organic substance metabolic process;GO:0008152//metabolic process;GO:0003824//catalytic activity;GO:0016787//hydrolase activity;
TraesCS7A02G391100	3.55	2.71	2.41	2.05	2.47	2.98	5.09	5.3	3.05	11.83	15.84	9.79	0.634131	9.85664e-56	2.06869	0	0.846727	1.16087e-90	2.28128	0	1.6205	0		pleiotropic drug resistance 12 (best arabidopsis hit); pleiotropic drug resistance protein, putative, expressed (best rice hit)	K05681//ATP-binding cassette, subfamily G (WHITE), member 2+ko02010//ABC transporters;K21396//ATP-binding cassette, subfamily G (WHITE), eye pigment precursor transporter;K16296//serine carboxypeptidase-like clade I [EC:3.4.16.-];K05681//ATP-binding cassette, subfamily G (WHITE), member 2+ko02010//ABC transporters	BAK01114.1|0.0e+00|predicted protein [Hordeum vulgare subsp. vulgare]	GO:0005623//cell;GO:0005886//plasma membrane;GO:0031224//intrinsic component of membrane;GO:0044464//cell part;GO:0071944//cell periphery;GO:0016021//integral component of membrane;GO:0044425//membrane part;GO:0016020//membrane;GO:0022804//active transmembrane transporter activity;GO:0016818//hydrolase activity, acting on acid anhydrides, in phosphorus-containing anhydrides;GO:0017111//nucleoside…
TraesCS2B02G271700	17.49	13.19	12.79	20.63	33.24	22.78	47.28	58.21	31.72	39.63	45.44	30.36	1.66126	0	1.41412	0	0.838699	0	0.591559	8.19109e-171	1.07654	0			K07198//5'-AMP-activated protein kinase, catalytic alpha subunit [EC:2.7.11.11]	AOO86834.1|6.0e-267|CBL-interacting protein kinase 23 [Triticum aestivum]
TraesCS7B02G317600	2.79	1.7	1.37	0	0.26	0.26	8.16	15.61	4.18	1.52	1.73	0.28	2.26521	9.90932e-44	-0.702955	0.0103153	5.74251	3.80637e-82	2.77435	3.23378e-08	2.31597	2.4155e-50			K11855//ubiquitin carboxyl-terminal hydrolase 36/42 [EC:3.4.19.12]	EMS53002.1|4.3e-60|14 kDa proline-rich protein DC2.15 [Triticum urartu]	GO:0016020//membrane;GO:0044425//membrane part;GO:0031224//intrinsic component of membrane;GO:0016021//integral component of membrane;
BGI_novel_G007270	0.72	0.59	0.73	0.38	0.52	8.08	4.08	1.62	3.45	22.85	16.22	12.59	2.17057	2.78799e-26	4.67926	1.65295e-271	0.0130179	0.926518	2.52171	1.43218e-166	2.46144	1.93719e-190			K11855//ubiquitin carboxyl-terminal hydrolase 36/42 [EC:3.4.19.12]
TraesCS1A02G037700	35.65	16.55	14.54	13.87	25.88	20.63	180.7	280	112.86	53.07	75.99	47.92	3.10836	0	1.40984	0	3.24962	0	1.5511	0	2.56922	0			K10775//phenylalanine ammonia-lyase [EC:4.3.1.24]+ko01100//Metabolic pathways+ko01110//Biosynthesis of secondary metabolites+ko00940//Phenylpropanoid biosynthesis+ko00360//Phenylalanine metabolism;K10775//phenylalanine ammonia-lyase [EC:4.3.1.24]+ko01100//Metabolic pathways+ko01110//Biosynthesis of secondary metabolites+ko00940//Phenylpropanoid biosynthesis+ko00360//Phenylalanine metabolism;K1077…	XP_020173247.1|0.0e+00|phenylalanine ammonia-lyase-like [Aegilops tauschii subsp. tauschii]
TraesCS5B02G339200	0.79	1.13	0.92	1.19	0.98	1.83	1	0.62	1.15	3.84	3.02	4.5	-0.0342255	0.797128	2.00256	4.74561e-101	-0.53304	1.33298e-05	1.50375	4.91202e-68	1.04197	2.68031e-48			K20826//RNA polymerase II-associated protein 1;K10418//dynein light chain LC8-type	XP_020172686.1|3.2e-277|rop guanine nucleotide exchange factor 1 [Aegilops tauschii subsp. tauschii]	GO:0022604//regulation of cell morphogenesis;GO:0009856//pollination;GO:0044706//multi-multicellular organism process;GO:0022414//reproductive process;GO:0065007//biological regulation;GO:0032989//cellular component morphogenesis;GO:0016049//cell growth;GO:0040008//regulation of growth;GO:0050793//regulation of developmental process;GO:0001558//regulation of cell growth;GO:0048856//anatomical str…
TraesCS3D02G406900	2.3	0.89	0.79	1.08	3.48	1.31	11.9	19.29	7.38	3.86	5.65	1.66	3.28434	0	1.49425	3.16703e-38	2.71666	2.56093e-274	0.926575	1.11181e-18	2.34554	2.00684e-300			K00430//peroxidase [EC:1.11.1.7]+ko01100//Metabolic pathways+ko01110//Biosynthesis of secondary metabolites+ko00940//Phenylpropanoid biosynthesis;K00430//peroxidase [EC:1.11.1.7]+ko01100//Metabolic pathways+ko01110//Biosynthesis of secondary metabolites+ko00940//Phenylpropanoid biosynthesis;K00430//peroxidase [EC:1.11.1.7]+ko01100//Metabolic pathways+ko01110//Biosynthesis of secondary metabolites…	XP_020189959.1|9.9e-183|peroxidase 2-like [Aegilops tauschii subsp. tauschii]
TraesCS2A02G410400	1.24	1.66	1.31	1.77	1.98	1.55	4.7	7	5.45	4.65	5.28	5.83	2.01557	1.45855e-217	1.89825	1.88022e-184	1.6938	2.17011e-171	1.57648	5.13477e-142	1.7894	0			K17686//Cu+-exporting ATPase [EC:3.6.3.54]+ko04016//MAPK signaling pathway - plant;K17686//Cu+-exporting ATPase [EC:3.6.3.54]+ko04016//MAPK signaling pathway - plant;K17686//Cu+-exporting ATPase [EC:3.6.3.54]+ko04016//MAPK signaling pathway - plant;K17686//Cu+-exporting ATPase [EC:3.6.3.54]+ko04016//MAPK signaling pathway - plant;K17686//Cu+-exporting ATPase [EC:3.6.3.54]+ko04016//MAPK signaling …	XP_020177972.1|0.0e+00|probable copper-transporting ATPase HMA5 isoform X2 [Aegilops tauschii subsp. tauschii]	GO:0010035//response to inorganic substance;GO:0006810//transport;GO:0006812//cation transport;GO:0006811//ion transport;GO:0051234//establishment of localization;GO:0030001//metal ion transport;GO:0051179//localization;GO:0010038//response to metal ion;GO:0050896//response to stimulus;GO:0046688//response to copper ion;GO:0097501//stress response to metal ion;GO:0006950//response to stress;GO:00…
TraesCS2A02G461500	7.18	1.99	1.71	4.2	12.27	2.09	13.35	15.3	7.54	17.61	19	3.03	1.75713	9.06034e-24	1.91224	4.00142e-29	0.938233	6.81041e-10	1.09334	1.79393e-13	1.37139	5.23889e-34			K06236//collagen, type I, alpha+ko04933//AGE-RAGE signaling pathway in diabetic complications	EMS65753.1|4.9e-36|hypothetical protein TRIUR3_02614 [Triticum urartu]
TraesCS7D02G530700	6.81	4.29	2.83	3.25	14.69	10.76	37.02	21.62	9.57	7.26	17.55	1.31	2.29889	0	0.92062	1.6673e-57	1.25058	4.8627e-240	-0.12769	0.00799903	1.15754	3.22764e-294			K13412//calcium-dependent protein kinase [EC:2.7.11.1]+ko04626//Plant-pathogen interaction;K01051//pectinesterase [EC:3.1.1.11]+ko00040//Pentose and glucuronate interconversions+ko01100//Metabolic pathways;K14306//nuclear pore complex protein Nup62+ko03013//RNA transport	XP_020175745.1|2.2e-220|GDSL esterase/lipase At4g28780-like [Aegilops tauschii subsp. tauschii]	GO:0016787//hydrolase activity;GO:0016788//hydrolase activity, acting on ester bonds;GO:0003824//catalytic activity;
TraesCS3B02G392200	32.24	22.12	22.35	13.96	20.67	12.8	57.94	78.07	73.84	27.1	34.49	23.04	1.4545	0	0.155151	0.000870603	2.1332	0	0.833848	1.03298e-56	1.24848	0			K01803//triosephosphate isomerase (TIM) [EC:5.3.1.1]+ko00010//Glycolysis / Gluconeogenesis+ko01230//Biosynthesis of amino acids+ko01100//Metabolic pathways+ko00051//Fructose and mannose metabolism+ko01110//Biosynthesis of secondary metabolites+ko00710//Carbon fixation in photosynthetic organisms+ko01200//Carbon metabolism+ko00562//Inositol phosphate metabolism;K12486//stromal membrane-associated …	CDM84975.1|7.3e-87|unnamed protein product [Triticum aestivum]
TraesCS5B02G059200	5.18	7.28	5.87	3.7	3.61	3.83	22.86	20.19	22.15	2	1.81	3.25	1.54914	5.69352e-287	-1.35067	8.41933e-81	2.22659	0	-0.67322	3.85187e-17	1.03524	2.2799e-174			K04450//cyclic AMP-dependent transcription factor ATF-2;K14432//ABA responsive element binding factor+ko04075//Plant hormone signal transduction;K09060//plant G-box-binding factor;K04450//cyclic AMP-dependent transcription factor ATF-2;K14432//ABA responsive element binding factor+ko04075//Plant hormone signal transduction;K09060//plant G-box-binding factor;K04450//cyclic AMP-dependent transcript…	XP_020183207.1|1.4e-155|light-inducible protein CPRF2-like isoform X1 [Aegilops tauschii subsp. tauschii]	GO:0097159//organic cyclic compound binding;GO:0003700//DNA binding transcription factor activity;GO:1901363//heterocyclic compound binding;GO:0005488//binding;GO:0003676//nucleic acid binding;GO:0140110//transcription regulator activity;GO:0003677//DNA binding;
TraesCS3B02G396400	1.67	2.99	1.54	2.58	3.11	3.58	5.5	4.5	5.31	4.8	5.34	7.12	1.29116	8.08597e-17	1.49125	3.10438e-23	0.70973	4.37052e-07	0.90982	2.32676e-11	1.0756	6.4336e-26				CDM84993.1|1.1e-57|unnamed protein product [Triticum aestivum]	GO:0030054//cell junction;GO:0055044//symplast;GO:0005911//cell-cell junction;GO:0009506//plasmodesma;
TraesCS6A02G377500	5.89	2.27	2.01	2	4.09	2.49	29.39	44.23	16.84	2.39	3.78	2.98	3.15685	0	-0.148622	0.0276937	3.39758	0	0.0921032	0.191739	2.41807	0			K04733//interleukin-1 receptor-associated kinase 4 [EC:2.7.11.1]	XP_020157547.1|0.0e+00|wall-associated receptor kinase 2-like [Aegilops tauschii subsp. tauschii]
TraesCS5A02G234300	7.26	8.66	7.46	3.96	4.46	3.06	12.78	8.82	14.58	13.62	13.09	17.7	0.6303	6.90004e-38	0.930164	1.86687e-88	1.64967	2.03314e-174	1.94953	1.91176e-267	1.2062	1.87131e-241			K05933//aminocyclopropanecarboxylate oxidase [EC:1.14.17.4]+ko01100//Metabolic pathways+ko01110//Biosynthesis of secondary metabolites+ko00270//Cysteine and methionine metabolism;K05933//aminocyclopropanecarboxylate oxidase [EC:1.14.17.4]+ko01100//Metabolic pathways+ko01110//Biosynthesis of secondary metabolites+ko00270//Cysteine and methionine metabolism	XP_020169459.1|7.4e-175|1-aminocyclopropane-1-carboxylate oxidase 1-like [Aegilops tauschii subsp. tauschii]
TraesCSU02G271000	1.05	5.49	2.93	3.81	0	21.9	0	0	0	48.79	0	42.01	-6.62921	3.14573e-13	3.31466	4.56135e-92	-8.14311	3.67348e-31	1.80076	1.27063e-46	1.36178	1.35304e-31			K16040//trans-resveratrol di-O-methyltransferase [EC:2.1.1.240]+ko00945//Stilbenoid, diarylheptanoid and gingerol biosynthesis	XP_020181790.1|1.9e-17|acetylserotonin O-methyltransferase 3-like [Aegilops tauschii subsp. tauschii]
TraesCS5D02G269400	25.49	15.58	12.89	21.99	34	16.62	34.95	53	22.61	52.31	63.73	32.89	1.04094	5.76017e-122	1.47792	1.51915e-281	0.599003	5.41953e-48	1.03598	2.31335e-161	1.03776	4.5456e-281			K13171//serine/arginine repetitive matrix protein 1+ko03015//mRNA surveillance pathway+ko03013//RNA transport;K12897//transformer-2 protein+ko03040//Spliceosome	XP_020165506.1|8.2e-71|uncharacterized protein LOC109751004 [Aegilops tauschii subsp. tauschii]	GO:0043167//ion binding;GO:0005509//calcium ion binding;GO:0005488//binding;GO:0043169//cation binding;GO:0046872//metal ion binding;
TraesCS2B02G606900	3.7	1.59	1.15	0.17	0.24	0.13	8.96	14.65	3.81	0	0	0	2.09609	3.08194e-226	-9.84952	2.47027e-80	5.67402	0	-6.27159	8.83425e-11	1.98337	6.15295e-211			K07418//cytochrome P450 family 2 subfamily J [EC:1.14.14.1]+ko00591//Linoleic acid metabolism+ko00590//Arachidonic acid metabolism+ko01100//Metabolic pathways;K00512//steroid 17alpha-monooxygenase / 17alpha-hydroxyprogesterone deacetylase [EC:1.14.14.19 1.14.14.32]+ko01100//Metabolic pathways	EMS54343.1|2.2e-274|Cytochrome P450 71D8 [Triticum urartu]
TraesCS4D02G221900	2.55	0.86	0.76	1.6	3.76	1.32	6.46	7.78	3.46	3.48	3.52	1.22	2.09137	1.14805e-79	0.989585	1.76462e-13	1.40003	6.13891e-46	0.298241	0.0125498	1.26144	5.28559e-57			K13412//calcium-dependent protein kinase [EC:2.7.11.1]+ko04626//Plant-pathogen interaction;K22020//mucin-19	XP_020156393.1|2.0e-187|uncharacterized protein LOC109741730 [Aegilops tauschii subsp. tauschii]	GO:0031224//intrinsic component of membrane;GO:0044425//membrane part;GO:0016021//integral component of membrane;GO:0016020//membrane;
TraesCS7D02G386600	20	10.52	11.27	10.94	17.98	13.05	63.68	94.83	37.42	29.18	41.94	18.91	2.23172	0	1.11203	0	2.22566	0	1.10598	0	1.77823	0		pleiotropic drug resistance 12 (best arabidopsis hit); pleiotropic drug resistance protein, putative, expressed (best rice hit)	K05681//ATP-binding cassette, subfamily G (WHITE), member 2+ko02010//ABC transporters;K21396//ATP-binding cassette, subfamily G (WHITE), eye pigment precursor transporter;K16296//serine carboxypeptidase-like clade I [EC:3.4.16.-];K05681//ATP-binding cassette, subfamily G (WHITE), member 2+ko02010//ABC transporters	BAJ99663.1|0.0e+00|predicted protein [Hordeum vulgare subsp. vulgare]	GO:0071944//cell periphery;GO:0016020//membrane;GO:0031224//intrinsic component of membrane;GO:0005886//plasma membrane;GO:0044425//membrane part;GO:0044464//cell part;GO:0016021//integral component of membrane;GO:0005623//cell;GO:0015399//primary active transmembrane transporter activity;GO:0042623//ATPase activity, coupled;GO:0017076//purine nucleotide binding;GO:0016887//ATPase activity;GO:000…
BGI_novel_G003949	3.85	4.87	2.71	6.03	7.94	5.81	12.43	13.46	12.2	8.25	8.16	11.26	1.74122	9.34273e-155	1.28402	2.01748e-72	0.938978	2.5163e-60	0.48178	9.82214e-15	1.07777	9.84561e-129			K03006//DNA-directed RNA polymerase II subunit RPB1 [EC:2.7.7.6]+ko03020//RNA polymerase;K02184//formin 2
TraesCS7D02G303500	20.3	14.28	18.2	10.5	14.5	21.95	50.83	43.32	29.65	31.75	32.83	20.2	1.23241	0	0.688577	2.55201e-160	1.3994	0	0.855566	1.58124e-231	1.06835	0			K17871//NADH:ubiquinone reductase (non-electrogenic) [EC:1.6.5.9]	XP_020148500.1|0.0e+00|external alternative NAD(P)H-ubiquinone oxidoreductase B2, mitochondrial-like [Aegilops tauschii subsp. tauschii]
TraesCS2D02G296100	12.25	4.89	5.53	5.58	14.29	6.4	29.83	44.75	16.29	17.83	23.71	10.78	2.00714	0	1.21413	2.39555e-190	1.78909	0	0.996081	4.50583e-138	1.55427	0		PREDICTED: Vitis vinifera hypothetical protein LOC100249092 (LOC100249092), mRNA	K08332//vacuolar protein 8;K04733//interleukin-1 receptor-associated kinase 4 [EC:2.7.11.1]	XP_020194067.1|3.0e-244|E3 ubiquitin-protein ligase PUB23-like [Aegilops tauschii subsp. tauschii]	GO:0003824//catalytic activity;GO:0019787//ubiquitin-like protein transferase activity;GO:0016740//transferase activity;GO:0140096//catalytic activity, acting on a protein;GO:0004842//ubiquitin-protein transferase activity;
TraesCS5B02G334600	5.05	7.82	6.04	4.22	4.2	8.78	5.93	3.48	9.71	19.35	16.4	22.43	0.0153997	0.795977	1.62487	6.10746e-283	0.144338	0.0180707	1.75381	0	1.09191	3.78915e-204			K14525//ribonucleases P/MRP protein subunit RPP25 [EC:3.1.26.5]+ko03013//RNA transport+ko03008//Ribosome biogenesis in eukaryotes;K14525//ribonucleases P/MRP protein subunit RPP25 [EC:3.1.26.5]+ko03013//RNA transport+ko03008//Ribosome biogenesis in eukaryotes;K14525//ribonucleases P/MRP protein subunit RPP25 [EC:3.1.26.5]+ko03013//RNA transport+ko03008//Ribosome biogenesis in eukaryotes	BAJ96858.1|1.4e-186|predicted protein, partial [Hordeum vulgare subsp. vulgare]	GO:0005488//binding;GO:0003676//nucleic acid binding;GO:0097159//organic cyclic compound binding;GO:1901363//heterocyclic compound binding;
TraesCS2D02G466200	1.74	1.69	1.15	0.22	0.41	1.33	4.39	4.4	5.2	9.76	10.64	10.72	1.61449	5.18005e-41	2.77499	1.01917e-173	2.82604	2.29604e-80	3.98653	1.00672e-233	2.78436	6.11074e-251				EES15527.2|1.4e-46|hypothetical protein SORBI_3008G009400 [Sorghum bicolor]
TraesCS4D02G019200	2.16	1.1	1.04	0.64	1.44	0.48	5.18	7.66	3.39	0.96	0.42	0.39	1.92173	8.66074e-87	-1.26812	7.79534e-14	2.6624	2.5422e-127	-0.527446	0.00638194	1.40065	8.39571e-62	bHLH		K13422//transcription factor MYC2+ko04016//MAPK signaling pathway - plant+ko04075//Plant hormone signal transduction;K13422//transcription factor MYC2+ko04016//MAPK signaling pathway - plant+ko04075//Plant hormone signal transduction	XP_020175444.1|1.6e-189|transcription factor bHLH25-like [Aegilops tauschii subsp. tauschii]	GO:0046983//protein dimerization activity;GO:0005515//protein binding;GO:0005488//binding;
TraesCS3A02G175400	8.98	9.23	8.38	13.92	17.18	13.52	37.43	34.96	35.63	22.07	17.99	31.47	2.02514	0	1.43656	1.1724e-133	1.2658	2.59099e-165	0.677221	9.06656e-40	1.3352	1.93689e-297			K14325//RNA-binding protein with serine-rich domain 1+ko03015//mRNA surveillance pathway+ko03013//RNA transport;K00430//peroxidase [EC:1.11.1.7]+ko01100//Metabolic pathways+ko01110//Biosynthesis of secondary metabolites+ko00940//Phenylpropanoid biosynthesis	CDM82648.1|3.9e-44|unnamed protein product [Triticum aestivum]
TraesCS7B02G317800	7.86	2.54	2.23	0.52	3.74	0.74	14.45	25.38	4.93	0.08	0	0	1.83996	1.5289e-57	-7.34164	2.17855e-38	3.15244	4.56996e-105	-6.02916	2.79555e-17	1.36045	7.34217e-38			K11855//ubiquitin carboxyl-terminal hydrolase 36/42 [EC:3.4.19.12]	XP_020189096.1|3.0e-67|lipid transfer protein EARLI 1-like [Aegilops tauschii subsp. tauschii]
TraesCS2B02G303600	15.14	8.89	9.39	11.7	20.95	14.72	40.82	53.16	28.12	27.78	29.5	21.95	1.9029	0	1.24835	1.66586e-261	1.36424	0	0.709691	1.29396e-102	1.32141	0	Tify		K13464//jasmonate ZIM domain-containing protein+ko04075//Plant hormone signal transduction;K13464//jasmonate ZIM domain-containing protein+ko04075//Plant hormone signal transduction	XP_020151845.1|5.6e-85|protein TIFY 9-like [Aegilops tauschii subsp. tauschii]	GO:2001141//regulation of RNA biosynthetic process;GO:2000022//regulation of jasmonic acid mediated signaling pathway;GO:0023051//regulation of signaling;GO:0009889//regulation of biosynthetic process;GO:0031323//regulation of cellular metabolic process;GO:0031326//regulation of cellular biosynthetic process;GO:0019222//regulation of metabolic process;GO:0051172//negative regulation of nitrogen c…
TraesCS3A02G347500	26.78	21.94	20.46	20.67	26.71	22.04	48.88	56.35	48.24	46.49	42.33	42.27	1.12863	0	0.936621	0	1.09956	0	0.907545	0	1.02188	0	WRKY	Arabidopsis thaliana WRKY19; transcription factor (WRKY19) mRNA, complete cds	K13424//WRKY transcription factor 33+ko04016//MAPK signaling pathway - plant+ko04626//Plant-pathogen interaction;K13424//WRKY transcription factor 33+ko04016//MAPK signaling pathway - plant+ko04626//Plant-pathogen interaction	EMS64237.1|0.0e+00|putative WRKY transcription factor 33 [Triticum urartu]	GO:0010648//negative regulation of cell communication;GO:0009059//macromolecule biosynthetic process;GO:0043170//macromolecule metabolic process;GO:0001101//response to acid chemical;GO:0008152//metabolic process;GO:0050896//response to stimulus;GO:0010557//positive regulation of macromolecule biosynthetic process;GO:0010646//regulation of cell communication;GO:0031328//positive regulation of cel…
TraesCS2B02G124100	2.23	1.38	0.89	1.75	3.79	2.61	4.65	6.9	3.31	5.64	4.85	2.83	1.72951	2.5784e-70	1.57502	2.4837e-55	0.86331	1.09753e-24	0.708822	2.9921e-16	1.15967	1.11664e-72			K12761//carbon catabolite-derepressing protein kinase [EC:2.7.11.1];K07198//5'-AMP-activated protein kinase, catalytic alpha subunit [EC:2.7.11.11]	XP_020180072.1|3.9e-244|CBL-interacting protein kinase 29-like [Aegilops tauschii subsp. tauschii]
TraesCS2B02G182500	8.96	4.14	4.24	3.59	11.1	7.18	30.35	54.36	13.53	15.3	23.93	9.23	2.50761	0	1.49137	2.02521e-223	2.16779	0	1.15155	8.13456e-150	1.91118	0			K00487//trans-cinnamate 4-monooxygenase [EC:1.14.13.11]+ko00130//Ubiquinone and other terpenoid-quinone biosynthesis+ko01100//Metabolic pathways+ko01110//Biosynthesis of secondary metabolites+ko00940//Phenylpropanoid biosynthesis+ko00941//Flavonoid biosynthesis+ko00945//Stilbenoid, diarylheptanoid and gingerol biosynthesis+ko00360//Phenylalanine metabolism	BAJ98052.1|2.4e-296|predicted protein [Hordeum vulgare subsp. vulgare]	GO:0008152//metabolic process;GO:0019748//secondary metabolic process;GO:0044550//secondary metabolite biosynthetic process;GO:0009058//biosynthetic process;GO:0031224//intrinsic component of membrane;GO:0044425//membrane part;GO:0016020//membrane;GO:0016021//integral component of membrane;GO:0016709//oxidoreductase activity, acting on paired donors, with incorporation or reduction of molecular o…
TraesCS5A02G226400	0.43	0.42	0.25	2.07	1.79	1.43	2.74	1.7	2.81	1.89	2.34	1.46	2.72612	2.98332e-59	2.38203	1.75177e-40	0.448073	7.82035e-05	0.10398	0.389323	1.02143	1.14243e-27			K05278//flavonol synthase [EC:1.14.11.23]+ko01100//Metabolic pathways+ko01110//Biosynthesis of secondary metabolites+ko00941//Flavonoid biosynthesis	BAJ95341.1|4.3e-187|predicted protein [Hordeum vulgare subsp. vulgare]
BGI_novel_G001545	1.62	0.61	0.63	1.61	2.97	0.9	6.54	9.1	3.56	1.68	2.11	0.62	2.753	1.85742e-213	0.635643	6.59498e-07	1.8067	7.8752e-128	-0.310661	0.00428183	1.5107	2.46161e-122
TraesCS5A02G499900	17.78	10.87	8.6	11.08	20.14	14.69	32.26	48.65	23.27	20.94	25.03	17.22	1.4871	0	0.767214	8.04015e-175	1.18148	0	0.461588	3.53505e-71	1.01367	0			K13447//respiratory burst oxidase [EC:1.6.3.- 1.11.1.-]+ko04016//MAPK signaling pathway - plant+ko04626//Plant-pathogen interaction	XP_020164916.1|0.0e+00|respiratory burst oxidase homolog protein B-like [Aegilops tauschii subsp. tauschii]	GO:0016020//membrane;GO:0031224//intrinsic component of membrane;GO:0016021//integral component of membrane;GO:0044425//membrane part;GO:0004601//peroxidase activity;GO:0005488//binding;GO:0043169//cation binding;GO:0016209//antioxidant activity;GO:0043167//ion binding;GO:0005509//calcium ion binding;GO:0016651//oxidoreductase activity, acting on NAD(P)H;GO:0046872//metal ion binding;GO:0016491//…
TraesCS3B02G612100	1.07	1.13	1.06	1.11	1.73	1.47	3.85	3.11	4.25	2.56	2.14	1.84	1.78145	2.5019e-88	0.612807	2.40569e-08	1.68249	2.67087e-81	0.513844	2.05149e-06	1.26577	4.79251e-77			K21952//CASK-interacting protein;K21952//CASK-interacting protein	XP_020185557.1|2.9e-242|protein UPSTREAM OF FLC-like [Aegilops tauschii subsp. tauschii]
TraesCS4D02G102000	3	4.79	3.47	2.54	2.66	3.75	11.55	8.15	7.04	9.14	7.81	8.75	1.25197	1.34556e-49	1.1999	1.19684e-44	1.57252	6.00293e-69	1.52046	4.51878e-63	1.37697	6.51518e-110			K10752//histone-binding protein RBBP4;K07213//copper chaperone	XP_020172725.1|1.5e-79|heavy metal-associated isoprenylated plant protein 23-like [Aegilops tauschii subsp. tauschii]	GO:0055080//cation homeostasis;GO:0030001//metal ion transport;GO:0019725//cellular homeostasis;GO:0009987//cellular process;GO:0055065//metal ion homeostasis;GO:0098771//inorganic ion homeostasis;GO:0006811//ion transport;GO:0050801//ion homeostasis;GO:0046916//cellular transition metal ion homeostasis;GO:0055082//cellular chemical homeostasis;GO:0006873//cellular ion homeostasis;GO:0042592//hom…
TraesCS2B02G220100	2.51	2.55	1.72	0.78	2.05	0.93	7.78	17.91	7.44	8.33	6.89	3.35	2.29267	4.1223e-152	1.46419	1.42986e-47	3.13038	2.64234e-210	2.30189	5.48422e-86	2.29659	3.3277e-236			K08908//light-harvesting complex I chlorophyll a/b binding protein 2+ko00196//Photosynthesis - antenna proteins	CAA59049.1|2.8e-148|LHCI-680, photosystem I antenna protein [Hordeum vulgare subsp. vulgare]	GO:0008152//metabolic process;GO:0044238//primary metabolic process;GO:0006091//generation of precursor metabolites and energy;GO:1901564//organonitrogen compound metabolic process;GO:0044237//cellular metabolic process;GO:0071704//organic substance metabolic process;GO:0044267//cellular protein metabolic process;GO:0006807//nitrogen compound metabolic process;GO:0019538//protein metabolic proces…
TraesCS7A02G373600	12.26	7.41	4.67	7.98	12.94	8.09	23.87	28	14.33	16.84	20.67	15.82	1.4499	5.04774e-139	1.14335	4.09455e-78	1.18388	1.08863e-101	0.877317	7.59438e-51	1.16721	2.88615e-178				BAJ91431.1|1.7e-48|predicted protein, partial [Hordeum vulgare subsp. vulgare]
TraesCS5A02G545200	0.44	0.15	0.01	29.44	42.54	15.51	67.25	110.6	34.6	25.4	51.17	12.45	8.49125	0	7.24284	0	1.275	0	0.0265896	0.460186	1.78266	0		Leucine-rich repeat protein kinase family protein (best arabidopsis hit)		XP_020159656.1|1.6e-127|germin-like protein 8-5 [Aegilops tauschii subsp. tauschii]
TraesCS1B02G385100	3.05	1.91	1.79	2.82	4.5	2.68	6.64	7.33	5.46	5.66	5.39	4.62	1.52777	6.82732e-105	1.22125	1.05773e-60	0.954336	1.15131e-50	0.647815	7.53588e-22	1.06993	1.90925e-108			K20716//mitogen-activated protein kinase kinase kinase 17/18+ko04016//MAPK signaling pathway - plant	XP_020158372.1|1.2e-208|mitogen-activated protein kinase kinase kinase NPK1-like [Aegilops tauschii subsp. tauschii]
TraesCS5D02G435900	3.28	1.79	1.24	1.7	2.86	2.01	6.52	10.07	2.85	3.66	4.2	1.56	1.6304	2.51828e-291	0.587731	7.28097e-28	1.56786	4.09842e-274	0.525183	6.20893e-23	1.17298	8.26552e-262		LRR and NB-ARC domains-containing disease resistance protein (best arabidopsis hit)	K11817//indole-3-acetaldehyde oxidase [EC:1.2.3.7]+ko00380//Tryptophan metabolism;K11817//indole-3-acetaldehyde oxidase [EC:1.2.3.7]+ko00380//Tryptophan metabolism;K09842//abscisic-aldehyde oxidase [EC:1.2.3.14]+ko00906//Carotenoid biosynthesis+ko01100//Metabolic pathways+ko01110//Biosynthesis of secondary metabolites;K11817//indole-3-acetaldehyde oxidase [EC:1.2.3.7]+ko00380//Tryptophan metaboli…	XP_020162364.1|0.0e+00|indole-3-acetaldehyde oxidase-like isoform X1 [Aegilops tauschii subsp. tauschii]
TraesCS3D02G161000	7.1	5.2	6.55	5.86	7.3	8.22	13.49	15.6	13.48	12.7	13.22	12.02	1.17926	7.0027e-252	1.01306	4.89019e-175	0.99242	6.21428e-190	0.826225	3.28735e-124	1.00308	0				EMT17115.1|0.0e+00|hypothetical protein F775_05725 [Aegilops tauschii]
TraesCS3A02G000400	0.93	0.44	0.54	0.95	1.46	3.24	37.81	30.87	30.55	24.58	21.06	28.27	5.70111	0	5.27857	0	4.13058	0	3.70805	0	4.52081	0			K13171//serine/arginine repetitive matrix protein 1+ko03015//mRNA surveillance pathway+ko03013//RNA transport;K14325//RNA-binding protein with serine-rich domain 1+ko03015//mRNA surveillance pathway+ko03013//RNA transport	XP_020183666.1|6.3e-96|uncharacterized protein LOC109769325 [Aegilops tauschii subsp. tauschii]
TraesCS1D02G179900	3.57	2.61	1.42	0.61	1.26	1.05	7.12	4.78	2.25	7.36	4.76	2.26	0.905051	2.75783e-21	0.931047	1.71995e-22	2.27659	2.33795e-78	2.30258	2.49698e-80	1.44356	1.20984e-84			K02703//photosystem II P680 reaction center D1 protein [EC:1.10.3.9]+ko01100//Metabolic pathways+ko00195//Photosynthesis	NP_114239.1|2.1e-203|photosystem II protein D1 (chloroplast) [Triticum aestivum]	GO:0042221//response to chemical;GO:0071704//organic substance metabolic process;GO:0009767//photosynthetic electron transport chain;GO:0022900//electron transport chain;GO:0044238//primary metabolic process;GO:0008152//metabolic process;GO:0015979//photosynthesis;GO:0043170//macromolecule metabolic process;GO:0044237//cellular metabolic process;GO:0009635//response to herbicide;GO:0050896//respo…
TraesCS6A02G110600	5.22	2.04	2.53	2.19	4.57	2.41	11.06	12.92	11.06	6.45	7.77	4.64	1.84131	2.46305e-212	0.952655	5.04193e-43	1.93088	3.8208e-225	1.04222	2.08895e-49	1.51095	1.10782e-245			K22020//mucin-19	XP_020199837.1|3.4e-226|probable F-box protein At4g22030 [Aegilops tauschii subsp. tauschii]
TraesCS2B02G046800	0.79	0.56	0.61	2.36	3.24	2.23	2.88	3.62	3.29	3.18	3.13	5.82	2.33011	8.94503e-55	2.66399	4.90043e-79	0.333639	0.00165089	0.667517	2.93247e-11	1.19065	6.46519e-48			K01061//carboxymethylenebutenolidase [EC:3.1.1.45]+ko01100//Metabolic pathways+ko01110//Biosynthesis of secondary metabolites;K01061//carboxymethylenebutenolidase [EC:3.1.1.45]+ko01100//Metabolic pathways+ko01110//Biosynthesis of secondary metabolites	EMS62203.1|1.4e-120|Putative uncharacterized protein yghX [Triticum urartu]
TraesCS1D02G050700	3.52	1.74	2.31	0	3.78	4.97	41.68	4.69	2.21	0	0	0	2.7179	1.21703e-229	-8.81078	1.18585e-45	2.47159	4.70341e-206	-9.05709	4.99636e-52	1.59918	3.03778e-118				OEL35569.1|7.3e-18|Salt stress-induced protein [Dichanthelium oligosanthes]	GO:0048046//apoplast;GO:0005576//extracellular region;GO:0005488//binding;GO:0003824//catalytic activity;GO:0030246//carbohydrate binding;GO:0016853//isomerase activity;
TraesCS2B02G500100	28.86	27.14	25.43	20.24	35.89	31.51	112.25	113.93	63.6	53.4	60.98	46.62	1.83464	0	0.987836	7.59012e-194	1.75707	0	0.910271	1.5321e-168	1.43598	0				XP_020161190.1|2.8e-78|pathogenesis-related protein 1-like [Aegilops tauschii subsp. tauschii]
TraesCS5A02G236100	8.83	10.04	9.23	9.74	8.72	10.02	21.07	35.41	24.57	10.96	11.84	9.91	1.52995	0	0.224838	1.19902e-07	1.50558	0	0.200475	2.26132e-06	1.01189	0			K19984//exocyst complex component 5	XP_020181968.1|5.2e-258|uncharacterized protein LOC109767646 [Aegilops tauschii subsp. tauschii]	GO:0009058//biosynthetic process;GO:0008152//metabolic process;GO:0009536//plastid;GO:0044424//intracellular part;GO:0005737//cytoplasm;GO:0005622//intracellular;GO:0043229//intracellular organelle;GO:0043226//organelle;GO:0009507//chloroplast;GO:0005623//cell;GO:0043231//intracellular membrane-bounded organelle;GO:0044444//cytoplasmic part;GO:0043227//membrane-bounded organelle;GO:0044464//cell …
TraesCS1A02G379700	2.2	1.46	1.25	2.53	3.68	1.88	11.44	14.68	8.91	4.13	4.2	2.71	2.83824	0	1.17569	4.94329e-33	2.10949	3.45243e-232	0.446946	2.58244e-07	1.8308	6.36173e-254	MYB		K09422//transcription factor MYB, plant	XP_020191444.1|4.0e-173|transcription repressor MYB6-like [Aegilops tauschii subsp. tauschii]	GO:0009987//cellular process;GO:0030154//cell differentiation;GO:0006355//regulation of transcription, DNA-templated;GO:0065007//biological regulation;GO:0031326//regulation of cellular biosynthetic process;GO:0050789//regulation of biological process;GO:0006357//regulation of transcription from RNA polymerase II promoter;GO:0019222//regulation of metabolic process;GO:0031323//regulation of cellu…
TraesCS1B02G253000	1.26	0.78	0.96	1.03	1.99	0.83	1.58	3.09	1.22	3.86	2.7	2.1	0.975736	1.64577e-11	1.53581	2.46175e-31	0.612141	7.15934e-06	1.17222	3.64111e-21	1.08867	7.26272e-31			K13412//calcium-dependent protein kinase [EC:2.7.11.1]+ko04626//Plant-pathogen interaction;K13172//serine/arginine repetitive matrix protein 2	XP_020148165.1|1.0e-110|uncharacterized protein LOC109733368 [Aegilops tauschii subsp. tauschii]
TraesCS2D02G317600	0.4	0.7	0.5	1.17	1.33	1.93	0.84	0.73	1.24	3.61	4.11	3.15	0.863594	1.02988e-08	2.78377	3.02052e-145	-0.626674	8.03761e-08	1.2935	1.61373e-53	1.1904	2.69197e-59			K14801//pre-rRNA-processing protein TSR4;K14801//pre-rRNA-processing protein TSR4	XP_020192336.1|1.3e-257|programmed cell death protein 2-like [Aegilops tauschii subsp. tauschii]	GO:0044464//cell part;GO:0005737//cytoplasm;GO:0044424//intracellular part;GO:0005622//intracellular;GO:0005623//cell;
BGI_novel_G003372	6.29	2.71	3.39	1.71	4.42	2.01	12.18	16.41	15.81	4.28	5.52	2.72	1.84245	3.18503e-127	0.0274183	0.794941	2.43875	1.44073e-179	0.623723	1.04341e-07	1.47456	8.95431e-119
TraesCS3B02G392300	1.64	1.28	1.27	0.61	0.99	0.7	3.31	4.07	5.5	1.46	1.83	1.05	1.61536	4.24693e-114	0.0537144	0.56588	2.48217	4.80527e-197	0.920522	3.00511e-17	1.40802	3.18544e-124			K01803//triosephosphate isomerase (TIM) [EC:5.3.1.1]+ko00010//Glycolysis / Gluconeogenesis+ko01230//Biosynthesis of amino acids+ko01100//Metabolic pathways+ko00051//Fructose and mannose metabolism+ko01110//Biosynthesis of secondary metabolites+ko00710//Carbon fixation in photosynthetic organisms+ko01200//Carbon metabolism+ko00562//Inositol phosphate metabolism;K05402//toll-interacting protein;K12…	CDM84974.1|1.9e-70|unnamed protein product [Triticum aestivum]
TraesCS1A02G210100	0	0	0.09	2.71	4.54	6.91	31.66	4.88	20.81	0	0.09	0	9.38778	7.3907e-120	0.0506803	0.980181	1.99033	2.02106e-70	-7.34677	2.50577e-38	1.9999	2.40392e-71			K11855//ubiquitin carboxyl-terminal hydrolase 36/42 [EC:3.4.19.12]	EMS45029.1|3.2e-60|Cortical cell-delineating protein [Triticum urartu]
TraesCS1A02G370400	1.54	1.26	1.16	2.78	3.21	2.55	14.78	15.9	9.49	5.14	2.78	4.55	3.34517	0	1.65768	6.35563e-57	2.23008	3.59152e-265	0.542589	3.00694e-10	2.07988	0	AP2-EREBP	Malus x domestica AP2 domain class transcription factor (AP2D43) mRNA, complete cds	K09286//EREBP-like factor	XP_020149085.1|3.8e-125|ethylene-responsive transcription factor ERF109-like [Aegilops tauschii subsp. tauschii]
TraesCS5A02G373300	1.01	1.9	1.98	0.72	1.27	0.8	2.59	4.8	7.29	1.1	1.77	1.2	1.58132	9.39365e-14	-0.244776	0.402215	2.36826	2.71496e-22	0.542167	0.106317	1.28349	5.96424e-13				BAB21232.1|1.6e-13|hypothetical protein [Oryza sativa Japonica Group]	GO:0016021//integral component of membrane;GO:0031224//intrinsic component of membrane;GO:0044425//membrane part;GO:0016020//membrane;
TraesCS2A02G444900	2.55	2.98	2.11	2.06	1.99	1.87	13.69	16.06	10.55	5.86	4.54	10.46	2.41688	0	1.46397	1.94386e-167	2.77342	0	1.82051	5.65093e-227	2.18706	0			K15333//tRNA guanosine-2'-O-methyltransferase [EC:2.1.1.34];K14568//rRNA small subunit pseudouridine methyltransferase Nep1 [EC:2.1.1.260]+ko03008//Ribosome biogenesis in eukaryotes;K13172//serine/arginine repetitive matrix protein 2;K15333//tRNA guanosine-2'-O-methyltransferase [EC:2.1.1.34];K13412//calcium-dependent protein kinase [EC:2.7.11.1]+ko04626//Plant-pathogen interaction	XP_020196951.1|0.0e+00|CO(2)-response secreted protease-like [Aegilops tauschii subsp. tauschii]	GO:0016787//hydrolase activity;GO:0140096//catalytic activity, acting on a protein;GO:0017171//serine hydrolase activity;GO:0008233//peptidase activity;GO:0004175//endopeptidase activity;GO:0003824//catalytic activity;GO:0004252//serine-type endopeptidase activity;GO:0070011//peptidase activity, acting on L-amino acid peptides;GO:0008236//serine-type peptidase activity;
TraesCS5B02G219700	77.49	50.59	52.29	57.32	96.78	48.06	150.74	198.52	121.63	96.18	142.03	67.94	1.38728	0	0.771796	0	1.21519	0	0.599703	2.19787e-240	1.02583	0			K17987//next to BRCA1 gene 1 protein;K14306//nuclear pore complex protein Nup62+ko03013//RNA transport	XP_020165195.1|3.5e-149|tetraspanin-8 [Aegilops tauschii subsp. tauschii]	GO:0016021//integral component of membrane;GO:0044425//membrane part;GO:0016020//membrane;GO:0031224//intrinsic component of membrane;
TraesCS2A02G319500	12.32	9.38	6.51	13.95	22.7	15.32	37.92	44.1	22.36	28.88	22.6	26.15	1.8937	7.85531e-240	1.4737	8.99811e-126	0.996781	1.72327e-91	0.576781	1.4351e-27	1.18525	3.58918e-209				EMS55192.1|2.3e-40|hypothetical protein TRIUR3_28225 [Triticum urartu]
TraesCS5D02G387200	1.38	1.24	0.63	1	1.97	1.57	4.81	4.82	3.23	3.58	2.87	3.05	1.98784	1.76421e-64	1.5549	1.38762e-34	1.49779	9.08321e-44	1.06485	7.35858e-20	1.52433	8.74959e-77			K13420//LRR receptor-like serine/threonine-protein kinase FLS2 [EC:2.7.11.1]+ko04016//MAPK signaling pathway - plant+ko04626//Plant-pathogen interaction	XP_020182223.1|3.9e-227|leucine-rich repeat extensin-like protein 6 [Aegilops tauschii subsp. tauschii]
TraesCS4A02G106500	1.96	2.32	2.52	1.99	1.42	2.06	5.48	4.54	5.61	5.14	5.18	5.29	1.20061	1.44212e-51	1.20293	1.72565e-51	1.5108	3.1876e-72	1.51313	4.69256e-72	1.34781	2.43668e-120			K05359//arogenate/prephenate dehydratase [EC:4.2.1.91 4.2.1.51]+ko01230//Biosynthesis of amino acids+ko01100//Metabolic pathways+ko01110//Biosynthesis of secondary metabolites+ko00400//Phenylalanine, tyrosine and tryptophan biosynthesis	XP_020172375.1|1.8e-224|arogenate dehydratase/prephenate dehydratase 2, chloroplastic-like [Aegilops tauschii subsp. tauschii]	GO:1901576//organic substance biosynthetic process;GO:0044238//primary metabolic process;GO:0009058//biosynthetic process;GO:0008152//metabolic process;GO:1901607//alpha-amino acid biosynthetic process;GO:1901564//organonitrogen compound metabolic process;GO:0009072//aromatic amino acid family metabolic process;GO:0009987//cellular process;GO:0019752//carboxylic acid metabolic process;GO:0009095/…
TraesCS5A02G525100	1.3	0.66	0.54	0.49	2.11	0.95	7.67	9.19	3.89	1.77	2.16	0.98	3.05654	3.90681e-123	0.984774	1.20038e-07	2.5431	1.06126e-101	0.471337	0.00573379	2.09178	6.05472e-100		cysteine-rich RLK (RECEPTOR-like protein kinase) 10 (best arabidopsis hit)	K04733//interleukin-1 receptor-associated kinase 4 [EC:2.7.11.1]	XP_020193594.1|8.2e-121|cysteine-rich repeat secretory protein 38-like [Aegilops tauschii subsp. tauschii]	GO:0016301//kinase activity;GO:0016772//transferase activity, transferring phosphorus-containing groups;GO:0016740//transferase activity;GO:0003824//catalytic activity;
TraesCS7A02G555600	1.5	2.12	1.03	1.84	2.42	3.32	9.19	2.29	11.97	1.01	0.9	1.52	2.33628	0	-0.433114	6.97522e-06	1.62419	9.20365e-209	-1.14521	5.13465e-41	1.14262	3.20137e-141			K20923//mixed-linked glucan synthase [EC:2.4.1.-]	EMS45037.1|0.0e+00|Mixed-linked glucan synthase 2 [Triticum urartu]
TraesCS1B02G287800	1.68	0.91	0.84	1.02	1.03	0.61	4.98	5.02	3.76	1.44	1.89	1.48	2.0045	2.45117e-96	0.491932	8.83515e-05	2.36716	1.77657e-117	0.854592	1.76489e-10	1.61147	4.04127e-96			K19747//BAHD acyltransferase [EC:2.3.1.-]	XP_020154948.1|7.0e-304|uncharacterized acetyltransferase At3g50280-like [Aegilops tauschii subsp. tauschii]	GO:0016740//transferase activity;GO:0016746//transferase activity, transferring acyl groups;GO:0016747//transferase activity, transferring acyl groups other than amino-acyl groups;GO:0003824//catalytic activity;
BGI_novel_G007164	2.88	3.25	2.45	4.72	4.61	4.24	19.36	31.31	21.59	4.45	4.81	4.55	3.07564	0	0.691977	8.58238e-21	2.40776	0	0.024104	0.715217	1.96406	0			K00002//alcohol dehydrogenase (NADP+) [EC:1.1.1.2]+ko00010//Glycolysis / Gluconeogenesis+ko00040//Pentose and glucuronate interconversions+ko01100//Metabolic pathways+ko01110//Biosynthesis of secondary metabolites+ko00561//Glycerolipid metabolism;K00011//aldehyde reductase [EC:1.1.1.21]+ko00040//Pentose and glucuronate interconversions+ko01100//Metabolic pathways+ko00052//Galactose metabolism+ko0…		GO:0019290//siderophore biosynthetic process;GO:0050896//response to stimulus;GO:0051186//cofactor metabolic process;GO:0006807//nitrogen compound metabolic process;GO:0034224//cellular response to zinc ion starvation;GO:0043603//cellular amide metabolic process;GO:0006518//peptide metabolic process;GO:1901564//organonitrogen compound metabolic process;GO:0051188//cofactor biosynthetic process;GO…
TraesCS6D02G314300	59.7	38.3	36.38	37.63	52.18	44.01	112.93	110.42	85.42	88.52	95.63	86.49	1.2034	0	1.01756	0	1.20082	0	1.01497	0	1.11277	0			K10525//allene oxide cyclase [EC:5.3.99.6]+ko00592//alpha-Linolenic acid metabolism+ko01100//Metabolic pathways+ko01110//Biosynthesis of secondary metabolites	XP_020162997.1|2.1e-134|allene oxide cyclase, chloroplastic-like [Aegilops tauschii subsp. tauschii]
TraesCS2A02G398500	1.77	2.62	1.74	1.61	1.85	2.86	6.33	5.3	3.92	7.43	4.6	7.49	1.34819	3.8987e-73	1.67447	3.63914e-124	1.29637	1.23689e-68	1.62265	3.09795e-118	1.49349	5.41847e-188			K21952//CASK-interacting protein	XP_020188112.1|5.8e-233|fasciclin-like arabinogalactan protein 8 [Aegilops tauschii subsp. tauschii]
TraesCS4B02G378400	14.55	2.23	2.19	9.71	16.91	7.49	50.49	74.77	20.36	19.55	30.1	8.49	2.94569	0	1.6346	6.11257e-188	2.07342	0	0.762329	2.15176e-56	1.93904	0		Leucine-rich repeat protein kinase family protein (best arabidopsis hit)		XP_020191846.1|6.8e-124|germin-like protein 8-11 [Aegilops tauschii subsp. tauschii]
TraesCS7D02G122600	17.94	12.86	14.26	10.93	14.68	14.22	57.33	79.36	39.89	24.29	25.31	21.9	1.97461	0	0.671214	3.14756e-123	2.1477	0	0.844307	9.16673e-182	1.55275	0			K02492//glutamyl-tRNA reductase [EC:1.2.1.70]+ko00860//Porphyrin and chlorophyll metabolism+ko01100//Metabolic pathways+ko01110//Biosynthesis of secondary metabolites;K02492//glutamyl-tRNA reductase [EC:1.2.1.70]+ko00860//Porphyrin and chlorophyll metabolism+ko01100//Metabolic pathways+ko01110//Biosynthesis of secondary metabolites	XP_020199265.1|5.1e-297|glutamyl-tRNA reductase 3, chloroplastic [Aegilops tauschii subsp. tauschii]	GO:0042440//pigment metabolic process;GO:0006782//protoporphyrinogen IX biosynthetic process;GO:0046483//heterocycle metabolic process;GO:0009058//biosynthetic process;GO:0034641//cellular nitrogen compound metabolic process;GO:0006779//porphyrin-containing compound biosynthetic process;GO:1901564//organonitrogen compound metabolic process;GO:0046501//protoporphyrinogen IX metabolic process;GO:19…
TraesCS2B02G579100	9.16	9.12	7.37	10.44	17.57	12.54	40.81	48.49	26.8	9.85	9.3	7.74	2.18231	0	0.073225	0.0658573	1.51637	0	-0.59271	2.18064e-62	1.11925	0			K17839//polyamine oxidase [EC:1.5.3.17 1.5.3.-]+ko00410//beta-Alanine metabolism+ko00330//Arginine and proline metabolism	OEL32729.1|2.5e-244|putative polyamine oxidase 2 [Dichanthelium oligosanthes]	GO:0016491//oxidoreductase activity;GO:0003824//catalytic activity;
TraesCS5B02G328000	5.8	3	3.33	2.07	4.81	3.64	10.41	13.99	8	6.45	5.16	6.5	1.42014	5.2387e-83	0.583959	7.6643e-12	1.61742	1.11495e-99	0.781236	1.06681e-18	1.15917	7.70984e-94			K01771//1-phosphatidylinositol phosphodiesterase [EC:4.6.1.13]+ko00562//Inositol phosphate metabolism;K22020//mucin-19	XP_003578518.1|3.4e-144|PREDICTED: uncharacterized protein LOC100830569 [Brachypodium distachyon]	GO:0006629//lipid metabolic process;GO:0044238//primary metabolic process;GO:0008152//metabolic process;GO:0071704//organic substance metabolic process;GO:0016787//hydrolase activity;GO:0003824//catalytic activity;GO:0008081//phosphoric diester hydrolase activity;GO:0042578//phosphoric ester hydrolase activity;GO:0016788//hydrolase activity, acting on ester bonds;
TraesCS5D02G422800	1.84	2.41	1.3	1.39	2.43	0.91	4.31	8.89	4.87	5.75	4.95	2.66	1.70641	1.41458e-62	1.27785	5.74741e-31	1.92782	2.74753e-73	1.49926	7.85304e-39	1.61526	2.87424e-99			K02694//photosystem I subunit III+ko01100//Metabolic pathways+ko00195//Photosynthesis;K02694//photosystem I subunit III+ko01100//Metabolic pathways+ko00195//Photosynthesis;K17987//next to BRCA1 gene 1 protein;K01051//pectinesterase [EC:3.1.1.11]+ko00040//Pentose and glucuronate interconversions+ko01100//Metabolic pathways	YP_008145507.1|1.2e-42|photosystem I subunit III (chloroplast) [Phaeocystis globosa]	GO:0009987//cellular process;GO:0008152//metabolic process;GO:0044237//cellular metabolic process;GO:0015979//photosynthesis;GO:0043234//protein complex;GO:0009538//photosystem I reaction center;GO:0009521//photosystem;GO:0044436//thylakoid part;GO:0044444//cytoplasmic part;GO:0043231//intracellular membrane-bounded organelle;GO:0009579//thylakoid;GO:0043227//membrane-bounded organelle;GO:0034357…
TraesCS2B02G097400	0.49	0.58	0.43	1.48	1.84	1.39	6.53	9.68	3.48	1.05	0.67	1.51	3.68614	0	1.03752	1.24126e-11	2.05563	6.10022e-175	-0.592993	2.98503e-07	1.87543	2.39377e-180			K02902//large subunit ribosomal protein L28+ko03010//Ribosome;K15363//fanconi-associated nuclease 1 [EC:3.1.21.- 3.1.4.1];K01807//ribose 5-phosphate isomerase A [EC:5.3.1.6]+ko00030//Pentose phosphate pathway+ko01230//Biosynthesis of amino acids+ko01100//Metabolic pathways+ko01110//Biosynthesis of secondary metabolites+ko00710//Carbon fixation in photosynthetic organisms+ko01200//Carbon metabolis…	KQJ82293.1|5.7e-247|hypothetical protein BRADI_5g08260 [Brachypodium distachyon]	GO:0006810//transport;GO:0051234//establishment of localization;GO:0055085//transmembrane transport;GO:0051179//localization;GO:0043226//organelle;GO:0005773//vacuole;GO:0044422//organelle part;GO:0005737//cytoplasm;GO:0005623//cell;GO:0098805//whole membrane;GO:0044425//membrane part;GO:0098588//bounding membrane of organelle;GO:0044424//intracellular part;GO:0016021//integral component of membr…
TraesCS6B02G138900	2.55	1.64	1.81	1.58	2.74	1.37	6.51	7.71	5.8	3.37	4.87	1.95	1.74111	1.34805e-111	0.774596	3.75394e-17	1.80962	4.63199e-117	0.843106	1.63941e-19	1.37395	9.08323e-119			K22020//mucin-19	XP_020199837.1|2.7e-228|probable F-box protein At4g22030 [Aegilops tauschii subsp. tauschii]
TraesCS4B02G377700	1.74	0.32	0.15	2.98	1.69	1.49	5.23	11.02	3.74	3.82	3.01	0.88	3.18604	4.98605e-72	1.81974	7.33807e-16	1.6854	1.09783e-34	0.319097	0.0672891	1.72901	3.07276e-49		Leucine-rich repeat protein kinase family protein (best arabidopsis hit)		XP_020190032.1|3.6e-95|germin-like protein 8-5 [Aegilops tauschii subsp. tauschii]
TraesCS5A02G350600	3.13	2.07	1.62	1.73	2.64	1.94	6.29	14.6	6.73	6.08	4.91	2.46	2.0224	1.69385e-93	0.992998	4.48148e-17	2.12191	7.59033e-99	1.09251	1.28838e-19	1.64941	7.50199e-105			K08912//light-harvesting complex II chlorophyll a/b binding protein 1+ko01100//Metabolic pathways+ko00196//Photosynthesis - antenna proteins	XP_020169258.1|9.7e-153|chlorophyll a-b binding protein of LHCII type 1-like [Aegilops tauschii subsp. tauschii]	GO:0044238//primary metabolic process;GO:0009768//photosynthesis, light harvesting in photosystem I;GO:0019538//protein metabolic process;GO:0044267//cellular protein metabolic process;GO:0019684//photosynthesis, light reaction;GO:0071704//organic substance metabolic process;GO:0036211//protein modification process;GO:0015979//photosynthesis;GO:0044237//cellular metabolic process;GO:0044260//cell…
TraesCS4A02G257900	10.61	5.91	4.87	13.73	17.72	15.13	32.7	38.26	27.03	24.69	21.41	26.89	2.20451	0	1.79546	0	1.06801	0	0.658962	1.05654e-115	1.34092	0			K13412//calcium-dependent protein kinase [EC:2.7.11.1]+ko04626//Plant-pathogen interaction;K13172//serine/arginine repetitive matrix protein 2;K13412//calcium-dependent protein kinase [EC:2.7.11.1]+ko04626//Plant-pathogen interaction;K13172//serine/arginine repetitive matrix protein 2	XP_020152395.1|2.4e-184|transcription factor bHLH18-like [Aegilops tauschii subsp. tauschii]	GO:0044464//cell part;GO:0005623//cell;GO:0005634//nucleus;GO:0044424//intracellular part;GO:0043229//intracellular organelle;GO:0043226//organelle;GO:0005622//intracellular;GO:0043227//membrane-bounded organelle;GO:0043231//intracellular membrane-bounded organelle;GO:0005488//binding;GO:1901363//heterocyclic compound binding;GO:0003677//DNA binding;GO:0003676//nucleic acid binding;GO:0046983//pr…
TraesCS5B02G372500	5.79	4.69	3.54	5.64	8.65	6.71	18.23	19.27	9.96	10.53	10.41	8.9	1.76539	8.99389e-294	1.09669	9.1651e-91	1.17528	6.05376e-160	0.506583	6.21227e-25	1.14789	6.381e-250			K05359//arogenate/prephenate dehydratase [EC:4.2.1.91 4.2.1.51]+ko01230//Biosynthesis of amino acids+ko01100//Metabolic pathways+ko01110//Biosynthesis of secondary metabolites+ko00400//Phenylalanine, tyrosine and tryptophan biosynthesis	XP_020155658.1|9.2e-230|arogenate dehydratase/prephenate dehydratase 6, chloroplastic-like [Aegilops tauschii subsp. tauschii]	GO:0044249//cellular biosynthetic process;GO:0009095//aromatic amino acid family biosynthetic process, prephenate pathway;GO:0006558//L-phenylalanine metabolic process;GO:0017144//drug metabolic process;GO:0071704//organic substance metabolic process;GO:0006807//nitrogen compound metabolic process;GO:0019438//aromatic compound biosynthetic process;GO:0044238//primary metabolic process;GO:0009073/…
TraesCS4B02G006600	0.94	0.76	0.78	2.81	2.64	3.27	8.21	6.71	8.55	5.71	4.23	5.44	3.24955	1.10265e-240	2.63104	1.60472e-127	1.43301	1.06774e-88	0.814508	2.88059e-24	1.80188	2.45665e-201			K21026//acetylajmaline esterase [EC:3.1.1.80];K13412//calcium-dependent protein kinase [EC:2.7.11.1]+ko04626//Plant-pathogen interaction;K13412//calcium-dependent protein kinase [EC:2.7.11.1]+ko04626//Plant-pathogen interaction;K17987//next to BRCA1 gene 1 protein;K14306//nuclear pore complex protein Nup62+ko03013//RNA transport	XP_002457210.1|6.3e-108|GDSL esterase/lipase At5g03610 [Sorghum bicolor]	GO:0031224//intrinsic component of membrane;GO:0016020//membrane;GO:0044425//membrane part;GO:0016021//integral component of membrane;GO:0003824//catalytic activity;GO:0016787//hydrolase activity;GO:0016788//hydrolase activity, acting on ester bonds;
TraesCS5A02G396900	3.93	3.89	3.13	4.19	4.44	4.59	19.08	23.88	15.34	5.76	4.61	4.72	2.41532	0	0.467496	2.01853e-13	2.13865	0	0.190827	0.0016959	1.60889	0			K13172//serine/arginine repetitive matrix protein 2;K13171//serine/arginine repetitive matrix protein 1+ko03015//mRNA surveillance pathway+ko03013//RNA transport	XP_020194101.1|7.5e-300|uncharacterized protein LOC109779905 [Aegilops tauschii subsp. tauschii]
TraesCS2A02G539100	4.13	2.12	1.41	3.88	7.4	3.64	15.84	17.89	9.96	13.5	11.54	8.68	2.52263	1.98592e-78	2.16501	2.30049e-51	1.53136	1.99869e-41	1.17375	3.58874e-22	1.77913	3.52175e-89			K04733//interleukin-1 receptor-associated kinase 4 [EC:2.7.11.1];K10572//inositol-pentakisphosphate 2-kinase [EC:2.7.1.158]+ko01100//Metabolic pathways+ko04070//Phosphatidylinositol signaling system+ko00562//Inositol phosphate metabolism;K19307//25S rRNA (uracil2634-N3)-methyltransferase [EC:2.1.1.313];K12823//ATP-dependent RNA helicase DDX5/DBP2 [EC:3.6.4.13]+ko03040//Spliceosome	XP_020168072.1|1.5e-55|heavy metal-associated isoprenylated plant protein 39-like [Aegilops tauschii subsp. tauschii]
TraesCS5D02G294600	24.15	6.65	6.63	17.48	46.35	18.86	64.31	97.23	38.52	29.78	49.34	15.03	2.42361	0	1.33812	0	1.27966	0	0.194169	9.04262e-18	1.30399	0			K00423//L-ascorbate oxidase [EC:1.10.3.3]+ko01100//Metabolic pathways+ko00053//Ascorbate and aldarate metabolism;K00423//L-ascorbate oxidase [EC:1.10.3.3]+ko01100//Metabolic pathways+ko00053//Ascorbate and aldarate metabolism	XP_020178164.1|0.0e+00|L-ascorbate oxidase-like [Aegilops tauschii subsp. tauschii]
TraesCS3B02G230400	2.66	2.15	3.14	2.7	3.72	2.82	2.71	2.93	2.58	11.42	11.39	12.74	0.0844866	0.306883	2.39032	0	-0.203217	0.0099619	2.10262	0	1.49966	7.35936e-260			K21398//natural resistance-associated macrophage protein 2;K21398//natural resistance-associated macrophage protein 2;K21398//natural resistance-associated macrophage protein 2	ANT73694.1|2.2e-308|metal transporter NRAMP6 [Triticum polonicum]	GO:0016020//membrane;GO:0031224//intrinsic component of membrane;GO:0044425//membrane part;GO:0016021//integral component of membrane;GO:0005215//transporter activity;
TraesCS5B02G336200	1.67	0.9	0.71	1.04	2.02	1.95	8.2	10.22	4.21	9.18	12.12	9.02	2.79376	1.4665e-240	3.21683	0	2.1752	2.3395e-180	2.59827	9.25781e-295	2.67869	0			K01581//ornithine decarboxylase [EC:4.1.1.17]+ko00330//Arginine and proline metabolism+ko01100//Metabolic pathways+ko01110//Biosynthesis of secondary metabolites+ko00480//Glutathione metabolism	XP_020187683.1|2.3e-233|ornithine decarboxylase-like [Aegilops tauschii subsp. tauschii]
TraesCS3A02G103100	1.93	2.86	1.3	2.95	4.29	2.58	6.02	9.32	8.58	3.12	3.31	4.75	1.97643	2.57391e-109	0.882493	2.83723e-16	1.27567	1.14643e-58	0.181733	0.0577719	1.14318	4.09094e-72			K19519//transforming growth factor-beta-induced protein;K13412//calcium-dependent protein kinase [EC:2.7.11.1]+ko04626//Plant-pathogen interaction;K00430//peroxidase [EC:1.11.1.7]+ko01100//Metabolic pathways+ko01110//Biosynthesis of secondary metabolites+ko00940//Phenylpropanoid biosynthesis	ABI95408.1|1.9e-135|fasciclin-like protein FLA18 [Triticum aestivum]
TraesCS4A02G175800	0.71	0.84	0.79	2.2	3.25	2.87	5.58	5.04	4.68	4.22	4.31	5.03	2.71693	1.05381e-56	2.55166	3.02355e-47	0.866677	3.44296e-12	0.701415	4.88651e-08	1.43768	7.12112e-47				EMS56218.1|1.5e-95|hypothetical protein TRIUR3_20848 [Triticum urartu]
TraesCS2A02G522100	10.19	9.05	6.94	15.06	16.62	14.49	47.74	47.35	40.32	39.18	39.91	55	2.3736	0	2.36233	0	1.54626	0	1.53499	0	1.89775	0				EMS62831.1|3.6e-57|hypothetical protein TRIUR3_32658 [Triticum urartu]
TraesCS5B02G359500	3.03	2.55	2.85	2.62	2.75	2.56	9.98	13.51	7.35	2.73	3.12	2.39	1.85266	0	-0.028418	0.638156	1.93965	0	0.0585714	0.340859	1.24702	5.83787e-282		U-box domain-containing protein kinase family protein (best arabidopsis hit); protein kinase, putative, expressed (best rice hit)	K17768//mitochondrial import receptor subunit TOM70;K21991//protein unc-45;K22020//mucin-19;K17768//mitochondrial import receptor subunit TOM70;K21991//protein unc-45;K22020//mucin-19	XP_020160386.1|0.0e+00|HSP-interacting protein-like [Aegilops tauschii subsp. tauschii]
TraesCS4B02G291700	3.42	2.13	2.13	2.05	4.42	2.51	7.41	8.29	4.68	6.9	6.41	3.85	1.41265	1.03866e-96	1.16725	5.65556e-61	1.18046	2.62753e-73	0.935057	9.42268e-43	1.17573	1.16411e-132			K07437//cytochrome P450 family 26 subfamily A+ko01100//Metabolic pathways;K20667//beta-amyrin 28-monooxygenase [EC:1.14.13.201];K07437//cytochrome P450 family 26 subfamily A+ko01100//Metabolic pathways;K20667//beta-amyrin 28-monooxygenase [EC:1.14.13.201]	XP_020154541.1|2.1e-272|cytochrome P450 716B1-like [Aegilops tauschii subsp. tauschii]
TraesCS6D02G367100	7.08	2.73	3.45	1.74	4.04	1.37	10.62	17.53	6.53	7.83	10.96	3.9	1.39064	5.26643e-146	0.783389	1.12265e-38	2.27479	3.45296e-284	1.66754	3.98364e-124	1.49396	1.96985e-266		PREDICTED: Vitis vinifera hypothetical protein LOC100249092 (LOC100249092), mRNA	K08332//vacuolar protein 8;K10260//F-box and WD-40 domain protein 7+ko04120//Ubiquitin mediated proteolysis;K04733//interleukin-1 receptor-associated kinase 4 [EC:2.7.11.1];K13172//serine/arginine repetitive matrix protein 2	XP_020194705.1|1.3e-236|E3 ubiquitin-protein ligase PUB23-like [Aegilops tauschii subsp. tauschii]
TraesCS7D02G334700	8.94	2.6	2	3.87	15.09	5.35	30.99	48.93	12.3	6.57	16.43	2.03	2.77396	0	0.899119	8.55441e-43	1.92255	0	0.0477119	0.400182	1.64136	0			K00430//peroxidase [EC:1.11.1.7]+ko01100//Metabolic pathways+ko01110//Biosynthesis of secondary metabolites+ko00940//Phenylpropanoid biosynthesis	XP_020150150.1|5.9e-184|peroxidase P7-like [Aegilops tauschii subsp. tauschii]
BGI_novel_G001293	1.11	0.63	1.45	1.33	0.85	0.94	2.85	4.8	2.39	6.08	5.88	3.83	1.66186	3.02149e-08	2.34066	2.13714e-18	1.65086	3.78131e-08	2.32966	3.19764e-18	2.03323	1.71274e-24
TraesCS3B02G014000	2.55	0.25	0.71	0.73	3.12	0.48	3.16	9.76	2.17	1.01	2.77	1.13	2.1294	2.6015e-15	0.5259	0.140278	1.77965	2.45532e-12	0.176156	0.600568	1.35981	3.02727e-11				ACU00677.1|2.9e-45|putative protein [Triticum aestivum]
TraesCS2B02G500300	24.59	23.44	19.02	0.05	0.54	1.16	99.21	111.04	64.14	37.01	46.55	27.74	2.03947	0	0.695317	3.64587e-65	7.33683	0	5.99268	0	2.4798	0			K14496//abscisic acid receptor PYR/PYL family+ko04016//MAPK signaling pathway - plant+ko04075//Plant hormone signal transduction	XP_020161190.1|9.2e-80|pathogenesis-related protein 1-like [Aegilops tauschii subsp. tauschii]
TraesCS5D02G301100	7.38	8.47	8.94	4.86	6.57	8.5	23.1	27.77	21.9	36.83	18.21	46.11	1.55585	7.89393e-191	2.03455	0	1.86091	7.72282e-244	2.3396	0	1.95722	0				EMT29630.1|5.4e-104|hypothetical protein F775_05672 [Aegilops tauschii]
TraesCS3D02G285900	1.67	1.5	1.01	0.99	1.02	1	1.93	2.71	1.83	2.52	2.47	3.34	0.630353	7.49955e-08	0.997017	1.60474e-19	1.09814	6.69516e-18	1.4648	2.61182e-34	1.03806	1.42154e-35			K19366//spartin+ko04144//Endocytosis	XP_020157090.1|2.2e-208|senescence/dehydration-associated protein At4g35985, chloroplastic-like [Aegilops tauschii subsp. tauschii]
TraesCS6D02G099300	2.33	1.54	1.56	1.06	1.82	0.99	4.59	5.24	5.01	3.2	3.62	2.15	1.4514	2.95956e-66	0.732705	2.17945e-14	1.93089	6.62055e-98	1.21219	3.9722e-31	1.35736	5.0668e-95			K22020//mucin-19	XP_020199836.1|5.1e-238|probable F-box protein At4g22030 [Aegilops tauschii subsp. tauschii]
TraesCS6D02G298700	1.89	0.88	1.28	2.01	4.88	3.46	13.63	14.52	11.64	7.21	5.56	5.59	3.29488	0	2.18313	1.78318e-110	1.93718	2.82334e-203	0.825428	1.60424e-26	2.01692	0	AP2-EREBP	PREDICTED: Brachypodium distachyon disease resistance protein RPH8A-like (LOC100842838), mRNA.	K09286//EREBP-like factor	XP_020193072.1|2.1e-101|ethylene-responsive transcription factor ERF109-like [Aegilops tauschii subsp. tauschii]
TraesCS2A02G134400	1.91	1.36	1.14	0.81	1.27	1.12	4.49	5.7	4.36	2.35	2.1	2.15	1.72111	1.44354e-123	0.604044	9.37842e-12	2.20317	9.72055e-170	1.0861	2.43211e-29	1.49131	6.05101e-146			K22020//mucin-19;K00430//peroxidase [EC:1.11.1.7]+ko01100//Metabolic pathways+ko01110//Biosynthesis of secondary metabolites+ko00940//Phenylpropanoid biosynthesis	XP_020183671.1|1.2e-307|CTL-like protein DDB_G0274487 [Aegilops tauschii subsp. tauschii]	GO:0016020//membrane;GO:0016021//integral component of membrane;GO:0044425//membrane part;GO:0031224//intrinsic component of membrane;
TaCBFIVc-B14	0.64	1.04	0.2	2.11	1.55	1.77	0.38	0.77	0.63	4.39	3.86	5.07	-0.0752593	0.770963	2.83263	4.64313e-73	-1.61475	4.07706e-16	1.29314	5.87079e-27	1.04341	5.09437e-22	AP2-EREBP		K09286//EREBP-like factor	AAT76662.1|5.1e-123|C repeat-binding factor 2 [Triticum aestivum]
BGI_novel_G010598	0	0	0	3.36	2.13	3.23	2.91	2.78	4.1	3.64	3.32	4.92	8.72592	2.2605e-42	9.01646	2.0392e-49	0.15023	0.300428	0.440779	0.00144689	1.30878	3.96093e-28
TraesCS3B02G219700	1.07	1.08	1.11	0.84	1.56	0.96	2.86	7.63	1.96	5.04	5.63	1.98	1.9399	1.23236e-82	1.96694	3.6673e-85	1.89709	6.87238e-80	1.92412	2.23325e-82	1.93193	4.78077e-163			K04035//magnesium-protoporphyrin IX monomethyl ester (oxidative) cyclase [EC:1.14.13.81]+ko00860//Porphyrin and chlorophyll metabolism+ko01100//Metabolic pathways+ko01110//Biosynthesis of secondary metabolites;K04035//magnesium-protoporphyrin IX monomethyl ester (oxidative) cyclase [EC:1.14.13.81]+ko00860//Porphyrin and chlorophyll metabolism+ko01100//Metabolic pathways+ko01110//Biosynthesis of s…	XP_020190830.1|3.1e-186|magnesium-protoporphyrin IX monomethyl ester [oxidative] cyclase, chloroplastic [Aegilops tauschii subsp. tauschii]
TraesCS7A02G042600	1.18	0.68	0.35	0.99	2.89	1.23	0.99	2.22	0.59	11.78	18.15	6.73	0.775602	3.01234e-08	4.0627	0	-0.471718	3.00775e-05	2.81538	0	2.44429	0			K13029//4-hydroxyphenylacetaldehyde oxime monooxygenase [EC:1.14.14.37]+ko01110//Biosynthesis of secondary metabolites+ko00460//Cyanoamino acid metabolism;K13029//4-hydroxyphenylacetaldehyde oxime monooxygenase [EC:1.14.14.37]+ko01110//Biosynthesis of secondary metabolites+ko00460//Cyanoamino acid metabolism	XP_020165455.1|5.6e-297|4-hydroxyphenylacetaldehyde oxime monooxygenase-like [Aegilops tauschii subsp. tauschii]
TraesCS3A02G105700	6.26	4.6	3.64	6.44	9.85	6.93	15.86	16.53	11.71	13	9.87	14.9	1.5878	0	1.42398	5.10691e-306	0.821875	4.99325e-142	0.658053	2.88919e-86	1.07731	0			K22020//mucin-19;K17987//next to BRCA1 gene 1 protein	BAJ95396.1|3.3e-307|predicted protein [Hordeum vulgare subsp. vulgare]
BGI_novel_G008490	0.75	1.32	1.21	1.29	0.95	0.84	1.61	1.83	3.43	1.65	2.01	2.62	1.06665	5.87024e-11	0.946841	1.39074e-08	1.14476	4.66682e-12	1.02496	1.48994e-09	1.04671	5.08913e-19			K03879//NADH-ubiquinone oxidoreductase chain 2 [EC:1.6.5.3]+ko01100//Metabolic pathways+ko00190//Oxidative phosphorylation		GO:0005623//cell;GO:0044464//cell part;GO:0016021//integral component of membrane;GO:0043226//organelle;GO:0043229//intracellular organelle;GO:0043231//intracellular membrane-bounded organelle;GO:0016020//membrane;GO:0043227//membrane-bounded organelle;GO:0044444//cytoplasmic part;GO:0031224//intrinsic component of membrane;GO:0005737//cytoplasm;GO:0005739//mitochondrion;GO:0044425//membrane part…
TraesCS4A02G043400	2.57	1.59	0.97	1.64	4.44	1.41	5.36	9.09	7.7	2.24	4.24	0.75	2.07946	8.04481e-256	0.490817	1.0324e-09	1.52255	2.78361e-166	-0.0660959	0.366453	1.19429	2.73413e-153			K17470//sulfate transporter 1, high-affinity;K17470//sulfate transporter 1, high-affinity;K17470//sulfate transporter 1, high-affinity;K17470//sulfate transporter 1, high-affinity	CAD55695.1|0.0e+00|sulphate transporter [Aegilops speltoides]	GO:0044425//membrane part;GO:0071944//cell periphery;GO:0044464//cell part;GO:0016021//integral component of membrane;GO:0016020//membrane;GO:0005886//plasma membrane;GO:0031224//intrinsic component of membrane;GO:0005623//cell;GO:0015075//ion transmembrane transporter activity;GO:0005215//transporter activity;GO:0015318//inorganic molecular entity transmembrane transporter activity;GO:0022804//a…
TraesCSU02G097600	19.95	11.04	9.13	14.78	25.51	22.22	79.23	95.61	50.79	39.63	45.56	34.64	2.48883	0	1.57323	0	1.85355	0	0.937951	0	1.75444	0		Hordeum vulgare subsp. vulgare mRNA for predicted protein, complete cds, clone: NIASHv2100P20	K05681//ATP-binding cassette, subfamily G (WHITE), member 2+ko02010//ABC transporters;K05681//ATP-binding cassette, subfamily G (WHITE), member 2+ko02010//ABC transporters;K21396//ATP-binding cassette, subfamily G (WHITE), eye pigment precursor transporter;K16296//serine carboxypeptidase-like clade I [EC:3.4.16.-];K05681//ATP-binding cassette, subfamily G (WHITE), member 2+ko02010//ABC transporte…	EMS61936.1|0.0e+00|Pleiotropic drug resistance protein 4 [Triticum urartu]	GO:0005886//plasma membrane;GO:0031224//intrinsic component of membrane;GO:0005623//cell;GO:0044425//membrane part;GO:0071944//cell periphery;GO:0016020//membrane;GO:0044464//cell part;GO:0016021//integral component of membrane;GO:0097159//organic cyclic compound binding;GO:1901265//nucleoside phosphate binding;GO:0022857//transmembrane transporter activity;GO:0043168//anion binding;GO:0005488//b…
TraesCS7B02G000200	11.81	5.31	6.62	4.33	8.72	4.06	23.76	32.45	14.72	10.2	17.89	2.64	1.58133	0	0.380215	6.27511e-45	2.05129	0	0.850174	6.88342e-184	1.32073	0		Triticum aestivum PDR-type ABC transporter (PDR1) mRNA, complete cds	K05681//ATP-binding cassette, subfamily G (WHITE), member 2+ko02010//ABC transporters	ACL80650.1|0.0e+00|PDR-type ABC transporter [Triticum aestivum]	GO:0051234//establishment of localization;GO:0006810//transport;GO:0051179//localization;GO:0044425//membrane part;GO:0016020//membrane;GO:0016021//integral component of membrane;GO:0031224//intrinsic component of membrane;GO:0016462//pyrophosphatase activity;GO:0035639//purine ribonucleoside triphosphate binding;GO:0097159//organic cyclic compound binding;GO:0016818//hydrolase activity, acting o…
TraesCS4D02G342800	5.07	1.54	4.43	1.57	1.87	1.38	8.3	14.42	13.47	2.69	4.84	3.08	1.71048	4.34302e-237	-0.0538837	0.446929	2.90159	0	1.13722	8.66958e-39	1.56097	2.54051e-268				XP_020197120.1|1.5e-289|uncharacterized protein LOC109782895 [Aegilops tauschii subsp. tauschii]	GO:0009405//pathogenesis;GO:0051704//multi-organism process;GO:0044419//interspecies interaction between organisms;GO:0005576//extracellular region;
TraesCS2A02G212800	5.16	3.66	4.08	6.49	5.81	7.9	24.15	27.31	19.08	11.67	8.62	15.78	2.49382	0	1.52734	4.23074e-165	1.85724	0	0.890758	8.41665e-71	1.74136	0			K09602//ubiquitin thioesterase protein OTUB1 [EC:3.4.19.12];K09602//ubiquitin thioesterase protein OTUB1 [EC:3.4.19.12];K09602//ubiquitin thioesterase protein OTUB1 [EC:3.4.19.12]	EMS54059.1|2.0e-119|hypothetical protein TRIUR3_17897 [Triticum urartu]
TraesCS4D02G071100	1.33	0.83	0.74	1.24	2.16	1.48	5.43	6.66	4.03	2.68	1.85	2.22	2.47488	2.52995e-130	1.22	7.72615e-22	1.72169	3.23681e-82	0.466804	2.95699e-05	1.56007	4.73533e-101			K14963//COMPASS component SWD3;K16794//platelet-activating factor acetylhydrolase IB subunit alpha+ko01100//Metabolic pathways+ko00565//Ether lipid metabolism	XP_020159033.1|1.3e-277|protein JINGUBANG-like [Aegilops tauschii subsp. tauschii]
TraesCS7A02G225200	5.52	5.1	4.56	4.74	5.81	6.9	16.2	15.17	12.32	10.92	7.9	16.37	1.52905	1.71872e-123	1.21959	5.80753e-71	1.31749	1.3845e-98	1.00802	2.09909e-52	1.27442	9.25065e-168				XP_020177936.1|1.3e-74|uncharacterized protein LOC109763499 [Aegilops tauschii subsp. tauschii]
TraesCS1B02G389900	1.31	1.11	0.99	2.05	3.21	1.75	5.35	6.62	3.24	3.89	2.08	3.2	2.16135	1.30902e-72	1.4338	8.05662e-26	1.11416	1.09716e-28	0.386615	0.000702735	1.23101	1.81478e-52	AP2-EREBP	Malus x domestica AP2 domain class transcription factor (AP2D43) mRNA, complete cds	K09286//EREBP-like factor	XP_020149086.1|1.4e-140|ethylene-responsive transcription factor ERF109-like [Aegilops tauschii subsp. tauschii]	GO:0098542//defense response to other organism;GO:0044271//cellular nitrogen compound biosynthetic process;GO:0009058//biosynthetic process;GO:0051704//multi-organism process;GO:0046483//heterocycle metabolic process;GO:0009059//macromolecule biosynthetic process;GO:0050832//defense response to fungus;GO:0010200//response to chitin;GO:0043170//macromolecule metabolic process;GO:0018130//heterocyc…
TraesCS6D02G236500	2.34	4.35	2.15	1.98	2.75	2.82	5.49	6.14	7.26	5.05	5.26	5.71	1.09819	3.16422e-70	0.863448	1.50348e-40	1.31744	1.32437e-92	1.0827	5.22855e-58	1.09127	2.28854e-126			K03695//ATP-dependent Clp protease ATP-binding subunit ClpB;K13412//calcium-dependent protein kinase [EC:2.7.11.1]+ko04626//Plant-pathogen interaction;K13172//serine/arginine repetitive matrix protein 2	XP_020184107.1|9.9e-279|aluminum-activated malate transporter 10 [Aegilops tauschii subsp. tauschii]	GO:0016021//integral component of membrane;GO:0044444//cytoplasmic part;GO:0044424//intracellular part;GO:0043227//membrane-bounded organelle;GO:0043231//intracellular membrane-bounded organelle;GO:0044425//membrane part;GO:0000325//plant-type vacuole;GO:0005623//cell;GO:0043229//intracellular organelle;GO:0016020//membrane;GO:0005737//cytoplasm;GO:0005774//vacuolar membrane;GO:0005773//vacuole;G…
BGI_novel_G012926	9.19	6.96	6.11	4.65	7.01	5.72	41.6	47.19	32.25	12.66	9.9	16.68	2.44601	0	0.822453	1.09504e-47	2.79442	0	1.17086	8.44214e-84	2.01903	0	Tify		K13464//jasmonate ZIM domain-containing protein+ko04075//Plant hormone signal transduction
TraesCS3D02G223400	1.25	0.52	0.52	1.14	3.32	1.15	4.48	2.94	2.48	2.46	2.89	0.72	2.11285	1.64989e-33	1.41645	8.96176e-13	0.810979	7.1168e-09	0.114581	0.469951	1.01828	4.68746e-19			K02184//formin 2	XP_020172554.1|5.3e-137|uncharacterized protein LOC109758119 [Aegilops tauschii subsp. tauschii]
TraesCS6B02G167900	28.6	22.31	26.18	21.41	28.55	22.42	129	180.44	114.83	39.35	40.31	36.58	2.46182	0	0.59617	5.82023e-144	2.54875	0	0.683106	5.74212e-182	1.85943	0			K04733//interleukin-1 receptor-associated kinase 4 [EC:2.7.11.1]	XP_020156576.1|3.2e-226|putative serine/threonine-protein kinase [Aegilops tauschii subsp. tauschii]	GO:0036094//small molecule binding;GO:0000166//nucleotide binding;GO:0043167//ion binding;GO:0016772//transferase activity, transferring phosphorus-containing groups;GO:0004674//protein serine/threonine kinase activity;GO:0016773//phosphotransferase activity, alcohol group as acceptor;GO:1901265//nucleoside phosphate binding;GO:0005524//ATP binding;GO:0003824//catalytic activity;GO:0017076//purin…
TraesCS6D02G362100	8.87	3.02	3.29	2.71	7.36	2.53	23.38	39.05	13.98	4.11	6.85	3.03	2.28678	0	-0.125196	0.0196699	2.55496	0	0.142983	0.0111847	1.66865	0			K04733//interleukin-1 receptor-associated kinase 4 [EC:2.7.11.1];K04733//interleukin-1 receptor-associated kinase 4 [EC:2.7.11.1]	XP_020157550.1|0.0e+00|wall-associated receptor kinase 2-like [Aegilops tauschii subsp. tauschii]
TraesCS3D02G353800	7.8	3.42	4.18	3.47	5.65	3.31	22.98	30.25	33.65	10.05	11.34	7.83	2.50842	0	0.939916	4.8807e-29	2.80996	0	1.24145	1.89605e-44	2.0743	0			K01803//triosephosphate isomerase (TIM) [EC:5.3.1.1]+ko00010//Glycolysis / Gluconeogenesis+ko01230//Biosynthesis of amino acids+ko01100//Metabolic pathways+ko00051//Fructose and mannose metabolism+ko01110//Biosynthesis of secondary metabolites+ko00710//Carbon fixation in photosynthetic organisms+ko01200//Carbon metabolism+ko00562//Inositol phosphate metabolism;K05402//toll-interacting protein;K13…	XP_020192350.1|1.3e-79|elicitor-responsive protein 1-like [Aegilops tauschii subsp. tauschii]
TraesCS2B02G384900	1.31	1.2	1	1.82	2.4	1.91	5.78	5.95	6.31	1.2	1.74	1.65	2.36271	1.07358e-294	0.392265	1.58988e-05	1.55304	1.13478e-168	-0.417401	1.35408e-07	1.23698	1.55926e-150			K04733//interleukin-1 receptor-associated kinase 4 [EC:2.7.11.1]	XP_020156837.1|0.0e+00|G-type lectin S-receptor-like serine/threonine-protein kinase At2g19130 [Aegilops tauschii subsp. tauschii]
TraesCS6B02G049200	1.47	2.33	2.59	1.2	0.88	1.47	1.6	1.25	3.05	5.17	4.09	5.53	-0.117749	0.442005	1.21723	1.77274e-23	0.718863	5.11201e-05	2.05384	6.87017e-48	1.05155	1.07376e-25			K11251//histone H2A	P02275.2|4.9e-74|RecName: Full=Histone H2A.1; AltName: Full=wcH2A-9
[truncated: 2,920 more rows]

## Sheet: Sheet5
Table S6. KEGG pathways significantly enriched by DEGs
[truncated: 22 more rows]

[truncated: 4 more sheets: Sheet6, Sheet11, Sheet7, Sheet8]
